# Supplementary material for: Tools for experimental and computational analyses of off-target editing by programmable nucleases
Source: Springer Nature journal article supplement (doi:10.1038/s41596-020-00431-y), 2020-12-07
Supplement: MOESM2 [file 41596_2020_431_MOESM2_ESM.xlsx]

## Sheet: Algorithm
Supplementary Table S1
Structures and training sets of machine-learning-based algorithms for off-target prediction
Algorithm	Availablity	Model type	Main features	Dataset for model training	PUBMED
predictCRISPR (Command line)	https://github.com/penn-hui/OfftargetPredict	Machine learning, ensemble Support-Vector Machine classifier	Mismatch positions, numbers and sequence dependent thermodynamics features (281 total features without selection)	Combination of 5 genome-wide unbiased methods based datasets (Tsai et al., 2015, Kim et al., 2015, Frock et al., 2015, Kim et al., 2016, Tsai et al., 2017)	30423065
CRISTA (Website, Command line)	http://crista.tau.ac.il/	Machine learning, Random Forest	Nucleotide identities, alignment, thermodynamics and genomic content related features (30 selected/64 total features)	Combination of 5 in-vivo genome-wide unbiased methods based datasets (Tsai et al., 2015; Kleinstiver et al., 2016; Frock et al., 2014; Ran et al., 2015; Slaymaker et al., 2015)	29036168
Elevation (Website, Command line)	https://crispr.ml https://github.com/microsoft/Elevation	Machine learning, Boosted Regression Trees to L1-regularized linear regression combiner model, two layered regression	gRNA spacer sequence and off-target sequence	The local version was trained by CFD and GUIDE-seq data(Doench et al., 2016; Tsai et al., 2015). The Elevation model deployed in the cloud service was trained by Avana data (Doench et al., 2016).	29998038
CNN_std (Command line)	https://github.com/MichaelLinn/off_target_prediction	Deep learning, Convolutional Neural Network	gRNA spacer sequence and off-target sequence	CRISPOR dataset excluding GUIDE-seq data (Cho et al., 2014; Hsu et al., 2013; Kim et al., 2015, 2016; Ran et al., 2015; Frock et al., 2015; Wang et al., 2015)	30423072
deepCRISPR (Command line)	https://github.com/bm2-lab/DeepCRISPR	Deep learning, Deep Convolutional Denoising Neural Network	gRNA spacer sequence and off-target sequence, cell type specific features (CTCF, Dnase I, H3K4Me3 and RRBS)	A subset of CRISPOR data that was validated through whole genome off-target detection techniques (Kim et al., 2015, 2016; Ran et al., 2015; Tsai et al., 2015; Frock et al., 2015; Wang et al., 2015)	29945655
Synergizing CRISPR (Command line)	https://github.com/Alexzsx/CRISPR	Deep learning, Adaptive Boosting	Scores from 5 other algorithms (CFD, MIT Website, MIT score, Cropit, CCTop) and evolutionary conservation	CRISPOR dataset (Cho et al., 2014; Hsu et al., 2013; Kim et al., 2015, 2016; Ran et al., 2015; Tsai et al., 2015; Frock et al., 2015; Wang et al., 2015)	30169558
