# Supplementary material for: Tools for experimental and computational analyses of off-target editing by programmable nucleases
Source: Springer Nature journal article supplement (doi:10.1038/s41596-020-00431-y), 2020-12-07
Supplement: MOESM4 [file 41596_2020_431_MOESM4_ESM15.xlsx]

## Sheet: Dataset
Supplementary Table S3
Dataset	PUBMED ID	Detection of True OT	Cell Type	#True OTs/#Total checked OTs	Note
2019_Gomez_Ospina	31492863	OT amplicon NGS (Indel rate >0.1%)	CD34+ HSPC	5/67	Screened OT sites with up to 3 mismatches, or up to 2 bases mismatches and 1 base DNA- or RNA-bulge identified by COSMID. Cas9 and chemically modified gRNAs were delivered as RNP complexes.
2020_Vaidyanathan	31839569	OT amplicon NGS (Indel rate >0.1%)	UABC	1/47	Screened OT sites with 3 bases mismatches identified by COSMID. Cas9 and chemically modified gRNAs were delivered as RNP complexes.
2013_Fu	23792628	OT amplicon T7EI	U2OS-EGFPs	24/291	Screened all potential OT sites with up to 2 mismatches and a subset of OT sites with 3-6 mismatches in the 5' half. Both Cas9 and gRNAs were delivered through plasmid transfection. OTs that had no optimized primers were removed.
2014_Cho	24253446	OT amplicon NGS (Indel rate >0.1%)	K562	10/106	Screened potential OT sites with up to 3 mismatches. Cas9 was delivered through plasmid transfection, and in vitro transcribed crRNAs and tracrRNAs were delivered 1 day after Cas9 transfection.
2019_Pavel-Dinu	30967552	OT amplicon NGS (Indel rate >0.1%)	mPB CD34+ HSPC	1/122	Screened OT sites with 3 bases mismatches identified by COSMID. Cas9 and gRNAs were delivered as RNP complexes. OTs that had significant editing efficiency in mocks (>0.1%) were removed from our analysis.
2019_Park	31147717	OT amplicon NGS (Indel rate >0.1%)	PB CD34+ HSPC	9/57	Screened OT sites with up to 3 mismatches, or up to 2 bases mismatches and 1 base DNA- or RNA-bulge identified by COSMID. Cas9 and chemically modified gRNAs were delivered as RNP complexes.
2015_Kim	25664545	OT amplicon NGS (Indel rate >0.1%)	HAP1	11/153	Screened OT sites identified in both of the two independent digenome-seqs, and OT sites with up to 3 mismatches identified by Cas-Offinder. Both Cas9 and gRNAs were delivered through plasmid transfection.
2015_Wang	25599175	OT amplicon NGS (Indel rate >0.1%)	HEK293T	11/52	Screened a subset of OT sites with up to 4 mismatches identified by Bioconductor package "Biostrings". Cas9 and gRNAs were delivered in the same plasmid through transfection.
2016_Kim	26786045	OT amplicon NGS (Indel rate >0.1%)	HeLa and HEK293T	118/257	Screened OT sites that were commonly captured by using Digenome-seq and GUIDE-seq. Both Cas9 and gRNAs were delivered through plasmid transfection.
