# Supplementary material for: Tools for experimental and computational analyses of off-target editing by programmable nucleases
Source: Springer Nature journal article supplement (doi:10.1038/s41596-020-00431-y), 2020-12-07
Supplement: MOESM6 [file 41596_2020_431_MOESM6_ESM.xlsx]

## Sheet: Sheet 1 - Supplementary Table S
Supplementary Table S3
Supplementary Table S5
#Bulge type	Bulge Size	Chromosome	Position	Direction	Mismatches	DNA	DNA_noind	crRNA	crRNA_noind	Dataset	TrueOT	cell_type	elevation	Cropit	Hsu	CCTOP	COSMID	MIT	CFD	CNN_std	Expanded_offtarget	CRISTA	predictCRISPR
RNA	1	chr4	3744369	+	2	CCAGCAGAGTGAGCCCAG-AGGG	CCAGCAGAGTGAGCCCAGAGGG	GCAGCATAGTGAGCCCAGAANRG	GCAGCATAGTGAGCCCAGAANRG	2019_Gomez-Ospina	0	CD34	0	0	0	0	42.54	0	0	0	ACACCAGCAGAGTGAGCCCAGAGGGTTTA	0.552281	0
RNA	1	chr4	3744369	+	3	CCAGCAGAGTGAGCCCA-GAGGG	CCAGCAGAGTGAGCCCAGAGGG	GCAGCATAGTGAGCCCAGAANRG	GCAGCATAGTGAGCCCAGAANRG	2019_Gomez-Ospina	0	CD34	0	0	0	0	38.54	0	0	0	ACACCAGCAGAGTGAGCCCAGAGGGTTTA	0.552281	0
RNA	1	chr17	40986920	-	2	TCAGGA-AGTGAGCCCAGAAAGG	TCAGGAAGTGAGCCCAGAAAGG	GCAGCATAGTGAGCCCAGAANRG	GCAGCATAGTGAGCCCAGAANRG	2019_Gomez-Ospina	0	CD34	0	0	0	0	47.35	0	0	0	AACATCAGGAAGTGAGCCCAGAAAGGTAA	0.251186	0
RNA	1	chrX	72341090	+	2	TCAGCAT-GTGAGCCCAGCATGG	TCAGCATGTGAGCCCAGCATGG	GCAGCATAGTGAGCCCAGAANRG	GCAGCATAGTGAGCCCAGAANRG	2019_Gomez-Ospina	0	CD34	0	0	0	0	42.5	0	0	0	CATTCAGCATGTGAGCCCAGCATGGCTTG	0.140556	0
RNA	1	chr9	124327586	+	2	TCAGAATAGTGA-CCCAGAAGGG	TCAGAATAGTGACCCAGAAGGG	GCAGCATAGTGAGCCCAGAANRG	GCAGCATAGTGAGCCCAGAANRG	2019_Gomez-Ospina	0	CD34	0	0	0	0	46.48	0	0	0	TGTTCAGAATAGTGACCCAGAAGGGAATC	0.157689	0
RNA	1	chr1	6176373	-	3	AAAG-CTAGTGAGCCCAGAATGG	AAAGCTAGTGAGCCCAGAATGG	GCAGCATAGTGAGCCCAGAANRG	GCAGCATAGTGAGCCCAGAANRG	2019_Gomez-Ospina	0	CD34	0	0	0	0	47.24	0	0	0	AGACAAAGCTAGTGAGCCCAGAATGGGCA	0.30874	0
RNA	1	chr1	6176373	-	2	AAAGC-TAGTGAGCCCAGAATGG	AAAGCTAGTGAGCCCAGAATGG	GCAGCATAGTGAGCCCAGAANRG	GCAGCATAGTGAGCCCAGAANRG	2019_Gomez-Ospina	0	CD34	0	0	0	0	47.43	0	0	0	AGACAAAGCTAGTGAGCCCAGAATGGGCA	0.30874	0
RNA	1	chr1	6176373	-	3	AAAGCT-AGTGAGCCCAGAATGG	AAAGCTAGTGAGCCCAGAATGG	GCAGCATAGTGAGCCCAGAANRG	GCAGCATAGTGAGCCCAGAANRG	2019_Gomez-Ospina	0	CD34	0	0	0	0	47.2	0	0	0	AGACAAAGCTAGTGAGCCCAGAATGGGCA	0.30874	0
DNA	1	chr13	29073686	-	2	TCAGCAAAGTGAGCCCCAGAAAGG	TCAGCAAAGTGAGCCCCAGAAAGG	GCAGCATAGTGAGCC-CAGAANRG	GCAGCATAGTGAGCCCAGAANRG	2019_Gomez-Ospina	0	CD34	0	0	0	0	45.05	0	0	0	GATCAGCAAAGTGAGCCCCAGAAAGGTGA	0.391199	0
RNA	1	chr13	95195397	+	2	GAAGCAA-GTGAGCCCAGAAGGG	GAAGCAAGTGAGCCCAGAAGGG	GCAGCATAGTGAGCCCAGAANRG	GCAGCATAGTGAGCCCAGAANRG	2019_Gomez-Ospina	0	CD34	0	0	0	0	47.26	0	0	0	CAGGAAGCAAGTGAGCCCAGAAGGGTAGG	0.187702	0
DNA	1	chr13	29073686	-	3	TCAGCAAAGTGAGCCCCAGAAAGG	TCAGCAAAGTGAGCCCCAGAAAGG	GCAGCATAGTGAGCCCA-GAANRG	GCAGCATAGTGAGCCCAGAANRG	2019_Gomez-Ospina	0	CD34	0	0	0	0	40.35	0	0	0	GATCAGCAAAGTGAGCCCCAGAAAGGTGA	0.391199	0
RNA	1	chr13	95195397	+	1	GAAGCA-AGTGAGCCCAGAAGGG	GAAGCAAGTGAGCCCAGAAGGG	GCAGCATAGTGAGCCCAGAANRG	GCAGCATAGTGAGCCCAGAANRG	2019_Gomez-Ospina	0	CD34	0	0	0	0	47.53	0	0	0	CAGGAAGCAAGTGAGCCCAGAAGGGTAGG	0.187702	0
DNA	1	chr13	29073686	-	3	TCAGCAAAGTGAGCCCCAGAAAGG	TCAGCAAAGTGAGCCCCAGAAAGG	GCAGCATAGTGA-GCCCAGAANRG	GCAGCATAGTGAGCCCAGAANRG	2019_Gomez-Ospina	0	CD34	0	0	0	0	44.95	0	0	0	GATCAGCAAAGTGAGCCCCAGAAAGGTGA	0.391199	0
DNA	1	chr13	29073686	-	2	TCAGCAAAGTGAGCCCCAGAAAGG	TCAGCAAAGTGAGCCCCAGAAAGG	GCAGCATAGTGAGC-CCAGAANRG	GCAGCATAGTGAGCCCAGAANRG	2019_Gomez-Ospina	0	CD34	0	0	0	0	45.45	0	0	0	GATCAGCAAAGTGAGCCCCAGAAAGGTGA	0.391199	0
RNA	1	chr13	95195397	+	3	GAAG-CAAGTGAGCCCAGAAGGG	GAAGCAAGTGAGCCCAGAAGGG	GCAGCATAGTGAGCCCAGAANRG	GCAGCATAGTGAGCCCAGAANRG	2019_Gomez-Ospina	0	CD34	0	0	0	0	47.13	0	0	0	CAGGAAGCAAGTGAGCCCAGAAGGGTAGG	0.187702	0
RNA	1	chr13	95195397	+	2	GAAGC-AAGTGAGCCCAGAAGGG	GAAGCAAGTGAGCCCAGAAGGG	GCAGCATAGTGAGCCCAGAANRG	GCAGCATAGTGAGCCCAGAANRG	2019_Gomez-Ospina	0	CD34	0	0	0	0	47.32	0	0	0	CAGGAAGCAAGTGAGCCCAGAAGGGTAGG	0.187702	0
DNA	1	chr13	29073686	-	2	TCAGCAAAGTGAGCCCCAGAAAGG	TCAGCAAAGTGAGCCCCAGAAAGG	GCAGCATAGTGAG-CCCAGAANRG	GCAGCATAGTGAGCCCAGAANRG	2019_Gomez-Ospina	0	CD34	0	0	0	0	46.05	0	0	0	GATCAGCAAAGTGAGCCCCAGAAAGGTGA	0.391199	0
RNA	1	chr13	95195397	+	3	GAAGCAAG-TGAGCCCAGAAGGG	GAAGCAAGTGAGCCCAGAAGGG	GCAGCATAGTGAGCCCAGAANRG	GCAGCATAGTGAGCCCAGAANRG	2019_Gomez-Ospina	0	CD34	0	0	0	0	46.91	0	0	0	CAGGAAGCAAGTGAGCCCAGAAGGGTAGG	0.187702	0
DNA	1	chr13	29073686	-	2	TCAGCAAAGTGAGCCCCAGAAAGG	TCAGCAAAGTGAGCCCCAGAAAGG	GCAGCATAGTGAGCCC-AGAANRG	GCAGCATAGTGAGCCCAGAANRG	2019_Gomez-Ospina	0	CD34	0	0	0	0	44.35	0	0	0	GATCAGCAAAGTGAGCCCCAGAAAGGTGA	0.391199	0
RNA	1	chr12	2076986	-	3	ACAG-CTAGTGAGCCCAGCATGG	ACAGCTAGTGAGCCCAGCATGG	GCAGCATAGTGAGCCCAGAANRG	GCAGCATAGTGAGCCCAGAANRG	2019_Gomez-Ospina	0	CD34	0	0	0	0	42.37	0	0	0	AGCCACAGCTAGTGAGCCCAGCATGGCGT	0.281059	0
RNA	1	chr12	2076986	-	2	ACAGC-TAGTGAGCCCAGCATGG	ACAGCTAGTGAGCCCAGCATGG	GCAGCATAGTGAGCCCAGAANRG	GCAGCATAGTGAGCCCAGAANRG	2019_Gomez-Ospina	0	CD34	0	0	0	0	42.56	0	0	0	AGCCACAGCTAGTGAGCCCAGCATGGCGT	0.281059	0
RNA	1	chr12	2076986	-	3	ACAGCT-AGTGAGCCCAGCATGG	ACAGCTAGTGAGCCCAGCATGG	GCAGCATAGTGAGCCCAGAANRG	GCAGCATAGTGAGCCCAGAANRG	2019_Gomez-Ospina	0	CD34	0	0	0	0	42.33	0	0	0	AGCCACAGCTAGTGAGCCCAGCATGGCGT	0.281059	0
RNA	1	chr4	165291650	-	3	ACAGAATAGAGAGCCCAG-AAAG	ACAGAATAGAGAGCCCAGAAAG	GCAGCATAGTGAGCCCAGAANRG	GCAGCATAGTGAGCCCAGAANRG				0	0	0	0	42.08	0	0	0	CACAACAGAATAGAGAGCCCAGAAAGAGA	0.0695668	0
RNA	1	chr4	174693481	-	3	ACAGAATAGAGAGCCCAG-AAAG	ACAGAATAGAGAGCCCAGAAAG	GCAGCATAGTGAGCCCAGAANRG	GCAGCATAGTGAGCCCAGAANRG				0	0	0	0	42.08	0	0	0	CTGAACAGAATAGAGAGCCCAGAAAGAAG	0.0675251	0
RNA	1	chr4	183995858	-	3	GCAGCATGCTGAGCCCAG-GCAG	GCAGCATGCTGAGCCCAGGCAG	GCAGCATAGTGAGCCCAGAANRG	GCAGCATAGTGAGCCCAGAANRG				0	0	0	0	36.27	0	0	0	GGGTGCAGCATGCTGAGCCCAGGCAGCCC	0.126914	0
RNA	1	chr4	141139475	+	3	GCATCACAGTTAGCCCAG-ATAG	GCATCACAGTTAGCCCAGATAG	GCAGCATAGTGAGCCCAGAANRG	GCAGCATAGTGAGCCCAGAANRG				0	0	0	0	41.79	0	0	0	TCTGCATCACAGTTAGCCCAGATAGCCTT	0.296912	0
RNA	1	chr4	114937303	-	3	GCATCATGGTGAGCACAG-AGAG	GCATCATGGTGAGCACAGAGAG	GCAGCATAGTGAGCCCAGAANRG	GCAGCATAGTGAGCCCAGAANRG				0	0	0	0	40.55	0	0	0	AATAGCATCATGGTGAGCACAGAGAGCCA	0.0553278	0
DNA	1	chr4	79964686	+	3	GCAGCGAGAGTGAGACCAAAACGG	GCAGCGAGAGTGAGACCAAAACGG	GCAGC-ATAGTGAGCCCAGAANRG	GCAGCATAGTGAGCCCAGAANRG				0	0	0	0	40.32	0	0	0	CAGGCAGCGAGAGTGAGACCAAAACGGTT	0.13887	0
DNA	1	chr4	120404	+	3	GGAGCCAAACTGAGCCCAGAATAG	GGAGCCAAACTGAGCCCAGAATAG	GCAGC-ATAGTGAGCCCAGAANRG	GCAGCATAGTGAGCCCAGAANRG				0	0	0	0	46.59	0	0	0	GAAGGAGCCAAACTGAGCCCAGAATAGCC	0.122947	0
RNA	1	chr4	163811474	+	3	GCAACATAGTGAGAA-AGAAAAG	GCAACATAGTGAGAAAGAAAAG	GCAGCATAGTGAGCCCAGAANRG	GCAGCATAGTGAGCCCAGAANRG				0	0	0	0	42.22	0	0	0	CCAGCAACATAGTGAGAAAGAAAAGAAAG	0.155286	0
RNA	1	chr4	163811474	+	3	GCAACATAGTGAGA-AAGAAAAG	GCAACATAGTGAGAAAGAAAAG	GCAGCATAGTGAGCCCAGAANRG	GCAGCATAGTGAGCCCAGAANRG				0	0	0	0	42.22	0	0	0	CCAGCAACATAGTGAGAAAGAAAAGAAAG	0.155286	0
RNA	1	chr4	163811474	+	3	GCAACATAGTGAG-AAAGAAAAG	GCAACATAGTGAGAAAGAAAAG	GCAGCATAGTGAGCCCAGAANRG	GCAGCATAGTGAGCCCAGAANRG				0	0	0	0	42.22	0	0	0	CCAGCAACATAGTGAGAAAGAAAAGAAAG	0.155286	0
RNA	1	chr4	138595759	+	3	GAAGCACAGTGAGAC-AGAAAAG	GAAGCACAGTGAGACAGAAAAG	GCAGCATAGTGAGCCCAGAANRG	GCAGCATAGTGAGCCCAGAANRG				0	0	0	0	43.93	0	0	0	AGGGAAGCACAGTGAGACAGAAAAGGAGA	0.155984	0
RNA	1	chr4	138595759	+	3	GAAGCACAGTGAGA-CAGAAAAG	GAAGCACAGTGAGACAGAAAAG	GCAGCATAGTGAGCCCAGAANRG	GCAGCATAGTGAGCCCAGAANRG				0	0	0	0	44.33	0	0	0	AGGGAAGCACAGTGAGACAGAAAAGGAGA	0.155984	0
RNA	1	chr4	138595759	+	3	GAAGCACAGTGAG-ACAGAAAAG	GAAGCACAGTGAGACAGAAAAG	GCAGCATAGTGAGCCCAGAANRG	GCAGCATAGTGAGCCCAGAANRG				0	0	0	0	44.33	0	0	0	AGGGAAGCACAGTGAGACAGAAAAGGAGA	0.155984	0
RNA	1	chr4	137892659	+	3	GCAGCTGAGTGAACC-AGAAAAG	GCAGCTGAGTGAACCAGAAAAG	GCAGCATAGTGAGCCCAGAANRG	GCAGCATAGTGAGCCCAGAANRG				0	0	0	0	44.05	0	0	0	ATTGCAGCTGAGTGAACCAGAAAAGTCTA	0.142023	0
RNA	1	chr4	137892659	+	3	GCAGCTGAGTGAAC-CAGAAAAG	GCAGCTGAGTGAACCAGAAAAG	GCAGCATAGTGAGCCCAGAANRG	GCAGCATAGTGAGCCCAGAANRG				0	0	0	0	44.45	0	0	0	ATTGCAGCTGAGTGAACCAGAAAAGTCTA	0.142023	0
RNA	1	chr4	137892659	+	3	GCAGCTGAGTGAA-CCAGAAAAG	GCAGCTGAGTGAACCAGAAAAG	GCAGCATAGTGAGCCCAGAANRG	GCAGCATAGTGAGCCCAGAANRG				0	0	0	0	45.05	0	0	0	ATTGCAGCTGAGTGAACCAGAAAAGTCTA	0.142023	0
RNA	1	chr4	130331432	+	3	GCAGCCTCCTGAGC-CAGAATGG	GCAGCCTCCTGAGCCAGAATGG	GCAGCATAGTGAGCCCAGAANRG	GCAGCATAGTGAGCCCAGAANRG				0	0	0	0	45.16	0	0	0	CAGGCAGCCTCCTGAGCCAGAATGGGCTC	0.145129	0
RNA	1	chr4	130331432	+	3	GCAGCCTCCTGAG-CCAGAATGG	GCAGCCTCCTGAGCCAGAATGG	GCAGCATAGTGAGCCCAGAANRG	GCAGCATAGTGAGCCCAGAANRG				0	0	0	0	45.76	0	0	0	CAGGCAGCCTCCTGAGCCAGAATGGGCTC	0.145129	0
RNA	1	chr4	117164468	+	3	GCAGCCAAGAGAGCC-AGAAGAG	GCAGCCAAGAGAGCCAGAAGAG	GCAGCATAGTGAGCCCAGAANRG	GCAGCATAGTGAGCCCAGAANRG				0	0	0	0	44.65	0	0	0	CCAGCAGCCAAGAGAGCCAGAAGAGTTTC	0.137085	0
RNA	1	chr4	117164468	+	3	GCAGCCAAGAGAGC-CAGAAGAG	GCAGCCAAGAGAGCCAGAAGAG	GCAGCATAGTGAGCCCAGAANRG	GCAGCATAGTGAGCCCAGAANRG				0	0	0	0	45.05	0	0	0	CCAGCAGCCAAGAGAGCCAGAAGAGTTTC	0.137085	0
RNA	1	chr4	117164468	+	3	GCAGCCAAGAGAG-CCAGAAGAG	GCAGCCAAGAGAGCCAGAAGAG	GCAGCATAGTGAGCCCAGAANRG	GCAGCATAGTGAGCCCAGAANRG				0	0	0	0	45.65	0	0	0	CCAGCAGCCAAGAGAGCCAGAAGAGTTTC	0.137085	0
RNA	1	chr4	108486127	-	3	GGAGCAGAGTGAACC-AGAAGGG	GGAGCAGAGTGAACCAGAAGGG	GCAGCATAGTGAGCCCAGAANRG	GCAGCATAGTGAGCCCAGAANRG				0	0	0	0	44.13	0	0	0	TCTGGGAGCAGAGTGAACCAGAAGGGGCT	0.114628	0
RNA	1	chr4	108486127	-	3	GGAGCAGAGTGAAC-CAGAAGGG	GGAGCAGAGTGAACCAGAAGGG	GCAGCATAGTGAGCCCAGAANRG	GCAGCATAGTGAGCCCAGAANRG				0	0	0	0	44.53	0	0	0	TCTGGGAGCAGAGTGAACCAGAAGGGGCT	0.114628	0
RNA	1	chr4	108486127	-	3	GGAGCAGAGTGAA-CCAGAAGGG	GGAGCAGAGTGAACCAGAAGGG	GCAGCATAGTGAGCCCAGAANRG	GCAGCATAGTGAGCCCAGAANRG				0	0	0	0	45.13	0	0	0	TCTGGGAGCAGAGTGAACCAGAAGGGGCT	0.114628	0
RNA	1	chr4	98211379	-	3	GCAGCATCCTGAGCC-AGAGTAG	GCAGCATCCTGAGCCAGAGTAG	GCAGCATAGTGAGCCCAGAANRG	GCAGCATAGTGAGCCCAGAANRG				0	0	0	0	38.97	0	0	0	TCAGGCAGCATCCTGAGCCAGAGTAGGCT	0.095702	0
RNA	1	chr4	130331432	+	3	GCAGCCTCCTGAGCC-AGAATGG	GCAGCCTCCTGAGCCAGAATGG	GCAGCATAGTGAGCCCAGAANRG	GCAGCATAGTGAGCCCAGAANRG				0	0	0	0	44.76	0	0	0	CAGGCAGCCTCCTGAGCCAGAATGGGCTC	0.145129	0
RNA	1	chr4	98211379	-	3	GCAGCATCCTGAG-CCAGAGTAG	GCAGCATCCTGAGCCAGAGTAG	GCAGCATAGTGAGCCCAGAANRG	GCAGCATAGTGAGCCCAGAANRG				0	0	0	0	39.97	0	0	0	TCAGGCAGCATCCTGAGCCAGAGTAGGCT	0.095702	0
RNA	1	chr4	18667489	+	3	GCAGCCTCCTGAGCC-AGAATAG	GCAGCCTCCTGAGCCAGAATAG	GCAGCATAGTGAGCCCAGAANRG	GCAGCATAGTGAGCCCAGAANRG				0	0	0	0	44.76	0	0	0	CGGGCAGCCTCCTGAGCCAGAATAGGCTC	0.154846	0
RNA	1	chr4	18667489	+	3	GCAGCCTCCTGAGC-CAGAATAG	GCAGCCTCCTGAGCCAGAATAG	GCAGCATAGTGAGCCCAGAANRG	GCAGCATAGTGAGCCCAGAANRG				0	0	0	0	45.16	0	0	0	CGGGCAGCCTCCTGAGCCAGAATAGGCTC	0.154846	0
RNA	1	chr4	18667489	+	3	GCAGCCTCCTGAG-CCAGAATAG	GCAGCCTCCTGAGCCAGAATAG	GCAGCATAGTGAGCCCAGAANRG	GCAGCATAGTGAGCCCAGAANRG				0	0	0	0	45.76	0	0	0	CGGGCAGCCTCCTGAGCCAGAATAGGCTC	0.154846	0
RNA	1	chr4	98211379	-	3	GCAGCATCCTGAGC-CAGAGTAG	GCAGCATCCTGAGCCAGAGTAG	GCAGCATAGTGAGCCCAGAANRG	GCAGCATAGTGAGCCCAGAANRG				0	0	0	0	39.37	0	0	0	TCAGGCAGCATCCTGAGCCAGAGTAGGCT	0.095702	0
DNA	1	chr7	62846314	+	3	GTAGCATAATGAAGCCCAGAGGAG	GTAGCATAATGAAGCCCAGAGGAG	GCAGCATAGTGA-GCCCAGAANRG	GCAGCATAGTGAGCCCAGAANRG				0	0	0	0	46.12	0	0	0	TTGGTAGCATAATGAAGCCCAGAGGAGAA	0.160825	0
DNA	1	chr4	146840287	+	3	GCAGCAGATGTGATCCCAGTAAAG	GCAGCAGATGTGATCCCAGTAAAG	GCAGCATA-GTGAGCCCAGAANRG	GCAGCATAGTGAGCCCAGAANRG				0	0	0	0	39.82	0	0	0	GCAGCAGCAGATGTGATCCCAGTAAAGAG	0.0797548	0
DNA	1	chr4	146659103	-	3	GCAGTATATGTCAGCCAAGAAAAG	GCAGTATATGTCAGCCAAGAAAAG	GCAGCATA-GTGAGCCCAGAANRG	GCAGCATAGTGAGCCCAGAANRG				0	0	0	0	43.36	0	0	0	CTGCAGTATATGTCAGCCAAGAAAAGGAA	0.109756	0
DNA	1	chr4	78876501	-	3	TCAGCATATCTGAGCCAAGAATAG	TCAGCATATCTGAGCCAAGAATAG	GCAGCATA-GTGAGCCCAGAANRG	GCAGCATAGTGAGCCCAGAANRG				0	0	0	0	43.73	0	0	0	CTTCAGCATATCTGAGCCAAGAATAGGAT	0.108995	0
DNA	1	chr4	61878327	+	3	GGAGCATAATTGAGCCCATAACAG	GGAGCATAATTGAGCCCATAACAG	GCAGCATA-GTGAGCCCAGAANRG	GCAGCATAGTGAGCCCAGAANRG				0	0	0	0	41.72	0	0	0	AGGGGAGCATAATTGAGCCCATAACAGGT	0.084218	0
DNA	1	chr4	52894974	-	3	TCAAAATAAGTGAGCCCAGAAAGG	TCAAAATAAGTGAGCCCAGAAAGG	GCAGCATA-GTGAGCCCAGAANRG	GCAGCATAGTGAGCCCAGAANRG				0	0	0	0	46.87	0	0	0	TTTCAAAATAAGTGAGCCCAGAAAGGCTT	0.214169	0
DNA	1	chr4	13537364	+	3	GCAGCAGCTGTGAGCCCAGAGCGG	GCAGCAGCTGTGAGCCCAGAGCGG	GCAGCATA-GTGAGCCCAGAANRG	GCAGCATAGTGAGCCCAGAANRG				0	0	0	0	46.85	0	0	0	TCCGCAGCAGCTGTGAGCCCAGAGCGGTT	0.171321	0
DNA	1	chr7	64537955	+	3	AACAGAATAGAGAGCCCAGAAAAG	AACAGAATAGAGAGCCCAGAAAAG	G-CAGCATAGTGAGCCCAGAANRG	GCAGCATAGTGAGCCCAGAANRG				0	0	0	0	46.54	0	0	0	AAAAACAGAATAGAGAGCCCAGAAAAGAA	0.070243	0
DNA	1	chr7	107714461	+	3	ACCAGCTTAGTGAGCCCAGGAAAG	ACCAGCTTAGTGAGCCCAGGAAAG	G-CAGCATAGTGAGCCCAGAANRG	GCAGCATAGTGAGCCCAGAANRG				0	0	0	0	41.22	0	0	0	CCCACCAGCTTAGTGAGCCCAGGAAAGTC	0.0926014	0
RNA	1	chr4	185563993	+	3	AGAGCAT-GTGAGTCCAGAATGG	AGAGCATGTGAGTCCAGAATGG	GCAGCATAGTGAGCCCAGAANRG	GCAGCATAGTGAGCCCAGAANRG				0	0	0	0	46.07	0	0	0	AGAAGAGCATGTGAGTCCAGAATGGAGCC	0.134332	0
RNA	1	chr4	131587806	+	3	ACAGAAT-GTGAGCCCAGATGAG	ACAGAATGTGAGCCCAGATGAG	GCAGCATAGTGAGCCCAGAANRG	GCAGCATAGTGAGCCCAGAANRG				0	0	0	0	41.31	0	0	0	CCAACAGAATGTGAGCCCAGATGAGGCAT	0.156148	0
RNA	1	chr4	109040383	-	3	GCAGCAT-GTGATCAGAGAAGGG	GCAGCATGTGATCAGAGAAGGG	GCAGCATAGTGAGCCCAGAANRG	GCAGCATAGTGAGCCCAGAANRG				0	0	0	0	42.32	0	0	0	TTTGGCAGCATGTGATCAGAGAAGGGCTC	0.0831821	0
RNA	1	chr4	75971781	+	3	GCATCAC-TTGAGCCCAGAAGGG	GCATCACTTGAGCCCAGAAGGG	GCAGCATAGTGAGCCCAGAANRG	GCAGCATAGTGAGCCCAGAANRG				0	0	0	0	46.87	0	0	0	GGAGCATCACTTGAGCCCAGAAGGGGGAA	0.195453	0
RNA	1	chr4	53632255	-	3	GGAGGAT-GGGAGCCCAGAAGAG	GGAGGATGGGAGCCCAGAAGAG	GCAGCATAGTGAGCCCAGAANRG	GCAGCATAGTGAGCCCAGAANRG				0	0	0	0	46.8	0	0	0	AAAGGGAGGATGGGAGCCCAGAAGAGAAA	0.0703033	0
RNA	1	chr4	14600886	-	3	GCAGCAG-ATGAGTCCAGAAAGG	GCAGCAGATGAGTCCAGAAAGG	GCAGCATAGTGAGCCCAGAANRG	GCAGCATAGTGAGCCCAGAANRG				0	0	0	0	45.74	0	0	0	AGCAGCAGCAGATGAGTCCAGAAAGGGAT	0.27584	0
RNA	1	chr4	7959955	+	3	GCAGCCT-GGGAACCCAGAAAGG	GCAGCCTGGGAACCCAGAAAGG	GCAGCATAGTGAGCCCAGAANRG	GCAGCATAGTGAGCCCAGAANRG				0	0	0	0	45.81	0	0	0	GGGGCAGCCTGGGAACCCAGAAAGGGGAG	0.171385	0
DNA	1	chr7	19625745	+	3	ACAGCATAGAGAGCCCAGAAATAG	ACAGCATAGAGAGCCCAGAAATAG	GCAGCATAGTGAGCCCA-GAANRG	GCAGCATAGTGAGCCCAGAANRG				0	0	0	0	38.08	0	0	0	GGAACAGCATAGAGAGCCCAGAAATAGAC	0.731654	0
DNA	1	chr7	36477661	-	3	GCAGAATAGAGAGCCCAGAAATAG	GCAGAATAGAGAGCCCAGAAATAG	GCAGCATAGTGAGCCCA-GAANRG	GCAGCATAGTGAGCCCAGAANRG				0	0	0	0	38.01	0	0	0	GAGCAGAATAGAGAGCCCAGAAATAGAGC	0.294451	0
DNA	1	chr7	152866737	-	3	GCAGCACAGGGAGACCACGAAGAG	GCAGCACAGGGAGACCACGAAGAG	GCAGCATAGTGAGCCCA-GAANRG	GCAGCATAGTGAGCCCAGAANRG				0	0	0	0	41.67	0	0	0	GGGCAGCACAGGGAGACCACGAAGAGAGA	0.133223	0
RNA	1	chr7	63407186	-	3	GCAACATAGTGAGACCAC-ATGG	GCAACATAGTGAGACCACATGG	GCAGCATAGTGAGCCCAGAANRG	GCAGCATAGTGAGCCCAGAANRG				0	0	0	0	37.42	0	0	0	CTGGGCAACATAGTGAGACCACATGGCTA	0.105707	0
RNA	1	chr7	63340912	+	3	GCAACATAGTGAGACCAC-ATGG	GCAACATAGTGAGACCACATGG	GCAGCATAGTGAGCCCAGAANRG	GCAGCATAGTGAGCCCAGAANRG				0	0	0	0	37.42	0	0	0	TGGGCAACATAGTGAGACCACATGGCTAC	0.302471	0
RNA	1	chr5	140544098	+	3	GCA-CACAGTGACTCCAGAAGAG	GCACACAGTGACTCCAGAAGAG	GCAGCATAGTGAGCCCAGAANRG	GCAGCATAGTGAGCCCAGAANRG				0	0	0	0	45.09	0	0	0	ACAGCACACAGTGACTCCAGAAGAGTTAG	0.160234	0
RNA	1	chr7	70382649	-	3	GCTGCATAATGAGTCCAG-ATAG	GCTGCATAATGAGTCCAGATAG	GCAGCATAGTGAGCCCAGAANRG	GCAGCATAGTGAGCCCAGAANRG				0	0	0	0	41.09	0	0	0	CAAAGCTGCATAATGAGTCCAGATAGAAA	0.0564461	0
RNA	1	chr7	84163343	+	3	GCAGCATAGTGAGCGAAG-GTAG	GCAGCATAGTGAGCGAAGGTAG	GCAGCATAGTGAGCCCAGAANRG	GCAGCATAGTGAGCCCAGAANRG				0	0	0	0	32.69	0	0	0	AAAGCAGCATAGTGAGCGAAGGTAGATGG	0.316662	0
RNA	1	chr7	149134474	-	3	GGAGCATCTTGAGCCCAG-AGGG	GGAGCATCTTGAGCCCAGAGGG	GCAGCATAGTGAGCCCAGAANRG	GCAGCATAGTGAGCCCAGAANRG				0	0	0	0	42.14	0	0	0	GGTGGGAGCATCTTGAGCCCAGAGGGTGG	0.069598	0
RNA	1	chr7	6634433	-	3	ACAGCA-AGGGACCCCAGAAGAG	ACAGCAAGGGACCCCAGAAGAG	GCAGCATAGTGAGCCCAGAANRG	GCAGCATAGTGAGCCCAGAANRG				0	0	0	0	45.94	0	0	0	GTGGACAGCAAGGGACCCCAGAAGAGGAG	0.0685474	0
RNA	1	chr7	43944534	-	3	GCAGCT-GGTGAGCACAGAAGGG	GCAGCTGGTGAGCACAGAAGGG	GCAGCATAGTGAGCCCAGAANRG	GCAGCATAGTGAGCCCAGAANRG				0	0	0	0	45.28	0	0	0	AGCTGCAGCTGGTGAGCACAGAAGGGGCT	0.249757	0
RNA	1	chr7	44142271	-	3	GCAGCC-AGTGAGCCCAGCCTGG	GCAGCCAGTGAGCCCAGCCTGG	GCAGCATAGTGAGCCCAGAANRG	GCAGCATAGTGAGCCCAGAANRG				0	0	0	0	36.45	0	0	0	GGCAGCAGCCAGTGAGCCCAGCCTGGGGT	0.16304	0
RNA	1	chr7	64792179	-	3	GCAGCC-TGTGGGCCCAGAATAG	GCAGCCTGTGGGCCCAGAATAG	GCAGCATAGTGAGCCCAGAANRG	GCAGCATAGTGAGCCCAGAANRG				0	0	0	0	46.38	0	0	0	TCAGGCAGCCTGTGGGCCCAGAATAGGCT	0.206408	0
RNA	1	chr7	86981337	-	3	GCAGTT-AGTGAGCCCAGACTAG	GCAGTTAGTGAGCCCAGACTAG	GCAGCATAGTGAGCCCAGAANRG	GCAGCATAGTGAGCCCAGAANRG				0	0	0	0	41.26	0	0	0	AATGGCAGTTAGTGAGCCCAGACTAGTCT	0.246355	0
RNA	1	chr7	136501793	-	3	GCAGCA-AGTGAGATCAGAGTGG	GCAGCAAGTGAGATCAGAGTGG	GCAGCATAGTGAGCCCAGAANRG	GCAGCATAGTGAGCCCAGAANRG				0	0	0	0	38.46	0	0	0	GCTGGCAGCAAGTGAGATCAGAGTGGGGG	0.13539	0
RNA	1	chr7	143520713	+	2	GCAGCA-GGTGAGTCCAGAAGAG	GCAGCAGGTGAGTCCAGAAGAG	GCAGCATAGTGAGCCCAGAANRG	GCAGCATAGTGAGCCCAGAANRG				0	0	0	0	46.09	0	0	0	ATTGCAGCAGGTGAGTCCAGAAGAGTGAT	0.231552	0
RNA	1	chr7	149805230	+	3	CCAGCA-AGTGAGCTGAGAAGGG	CCAGCAAGTGAGCTGAGAAGGG	GCAGCATAGTGAGCCCAGAANRG	GCAGCATAGTGAGCCCAGAANRG				0	0	0	0	43.34	0	0	0	GTCCCAGCAAGTGAGCTGAGAAGGGGCAG	0.140966	0
RNA	1	chr7	150962477	+	3	TCAGCA-AGACAGCCCAGAATGG	TCAGCAAGACAGCCCAGAATGG	GCAGCATAGTGAGCCCAGAANRG	GCAGCATAGTGAGCCCAGAANRG				0	0	0	0	46.34	0	0	0	TGCTCAGCAAGACAGCCCAGAATGGCATT	0.13666	0
DNA	1	chr7	62846314	+	3	GTAGCATAATGAAGCCCAGAGGAG	GTAGCATAATGAAGCCCAGAGGAG	GCAGCATAGTG-AGCCCAGAANRG	GCAGCATAGTGAGCCCAGAANRG				0	0	0	0	46.42	0	0	0	TTGGTAGCATAATGAAGCCCAGAGGAGAA	0.160825	0
DNA	1	chr7	73306068	+	3	ACAGCACAGTGGAGCCAAGAAAGG	ACAGCACAGTGGAGCCAAGAAAGG	GCAGCATAGTG-AGCCCAGAANRG	GCAGCATAGTGAGCCCAGAANRG				0	0	0	0	43.55	0	0	0	GGGACAGCACAGTGGAGCCAAGAAAGGGC	0.130407	0
DNA	1	chr7	118067242	-	3	GCAGCATAGTGTAAGCCAAAAGAG	GCAGCATAGTGTAAGCCAAAAGAG	GCAGCATAGTG-AGCCCAGAANRG	GCAGCATAGTGAGCCCAGAANRG				0	0	0	0	38.7	0	0	0	TTGCAGCATAGTGTAAGCCAAAAGAGAAA	0.167312	0
RNA	1	chr4	14600886	-	3	GCAGCA-GATGAGTCCAGAAAGG	GCAGCAGATGAGTCCAGAAAGG	GCAGCATAGTGAGCCCAGAANRG	GCAGCATAGTGAGCCCAGAANRG				0	0	0	0	45.74	0	0	0	AGCAGCAGCAGATGAGTCCAGAAAGGGAT	0.27584	0
RNA	1	chr4	75971781	+	3	GCATCA-CTTGAGCCCAGAAGGG	GCATCACTTGAGCCCAGAAGGG	GCAGCATAGTGAGCCCAGAANRG	GCAGCATAGTGAGCCCAGAANRG				0	0	0	0	46.87	0	0	0	GGAGCATCACTTGAGCCCAGAAGGGGGAA	0.195453	0
RNA	1	chr4	79262446	-	3	GCTGCA-AGTGAGACTAGAAAAG	GCTGCAAGTGAGACTAGAAAAG	GCAGCATAGTGAGCCCAGAANRG	GCAGCATAGTGAGCCCAGAANRG				0	0	0	0	43.91	0	0	0	CATAGCTGCAAGTGAGACTAGAAAAGTGA	0.0561642	0
RNA	1	chr4	110642249	+	3	TGTGCA-AGTGAGCCCAGAACAG	TGTGCAAGTGAGCCCAGAACAG	GCAGCATAGTGAGCCCAGAANRG	GCAGCATAGTGAGCCCAGAANRG				0	0	0	0	47.26	0	0	0	ATGTGTGCAAGTGAGCCCAGAACAGCTCC	0.16103	0
RNA	1	chr4	180988537	-	3	GCAGCA-AGTAAGCACACAATAG	GCAGCAAGTAAGCACACAATAG	GCAGCATAGTGAGCCCAGAANRG	GCAGCATAGTGAGCCCAGAANRG				0	0	0	0	41.06	0	0	0	GGTTGCAGCAAGTAAGCACACAATAGAAG	0.062826	0
DNA	1	chr4	67414582	-	3	GCAGCATTGTTTAGCCCAAAATGG	GCAGCATTGTTTAGCCCAAAATGG	GCAGCATAGTG-AGCCCAGAANRG	GCAGCATAGTGAGCCCAGAANRG				0	0	0	0	40.93	0	0	0	TGGCAGCATTGTTTAGCCCAAAATGGAAG	0.198642	0
DNA	1	chr4	90512246	-	3	GCACCATAGTAGAACCCAGAAAAG	GCACCATAGTAGAACCCAGAAAAG	GCAGCATAGTG-AGCCCAGAANRG	GCAGCATAGTGAGCCCAGAANRG				0	0	0	0	44.73	0	0	0	AGGCACCATAGTAGAACCCAGAAAAGGAG	0.33527	0
DNA	1	chr4	166172153	-	3	GCAGCCCAGTGAAGCCCAAAATAG	GCAGCCCAGTGAAGCCCAAAATAG	GCAGCATAGTG-AGCCCAGAANRG	GCAGCATAGTGAGCCCAGAANRG				0	0	0	0	41.46	0	0	0	AAGCAGCCCAGTGAAGCCCAAAATAGATG	0.16802	0
DNA	1	chr7	73306068	+	3	ACAGCACAGTGGAGCCAAGAAAGG	ACAGCACAGTGGAGCCAAGAAAGG	GCAGCATAGT-GAGCCCAGAANRG	GCAGCATAGTGAGCCCAGAANRG				0	0	0	0	43.65	0	0	0	GGGACAGCACAGTGGAGCCAAGAAAGGGC	0.130407	0
RNA	1	chr4	97996258	+	2	GCAGAATAGAGAGCCCAG-AAAG	GCAGAATAGAGAGCCCAGAAAG	GCAGCATAGTGAGCCCAGAANRG	GCAGCATAGTGAGCCCAGAANRG				0	0	0	0	42.2	0	0	0	AGAGCAGAATAGAGAGCCCAGAAAGAATG	0.572276	0
RNA	1	chr4	100090503	-	3	ACAGAATAGTGAACCCAG-AAAG	ACAGAATAGTGAACCCAGAAAG	GCAGCATAGTGAGCCCAGAANRG	GCAGCATAGTGAGCCCAGAANRG				0	0	0	0	41.48	0	0	0	TGGAACAGAATAGTGAACCCAGAAAGAAA	0.0935216	0
RNA	1	chr5	181113147	+	3	GCAG-ATAGTGAGGGCAAAAGAG	GCAGATAGTGAGGGCAAAAGAG	GCAGCATAGTGAGCCCAGAANRG	GCAGCATAGTGAGCCCAGAANRG				0	0	0	0	40.5	0	0	0	TAGGCAGATAGTGAGGGCAAAAGAGTCCT	0.137377	0
RNA	1	chr5	177514157	-	3	GGAG-ATGGTGAGCACAGAAAAG	GGAGATGGTGAGCACAGAAAAG	GCAGCATAGTGAGCCCAGAANRG	GCAGCATAGTGAGCCCAGAANRG				0	0	0	0	45.4	0	0	0	TTAGGGAGATGGTGAGCACAGAAAAGGTG	0.0570498	0
RNA	1	chr5	163154841	+	3	GCAG-ATGGCGAGCACAGAAAAG	GCAGATGGCGAGCACAGAAAAG	GCAGCATAGTGAGCCCAGAANRG	GCAGCATAGTGAGCCCAGAANRG				0	0	0	0	45.03	0	0	0	GGTGCAGATGGCGAGCACAGAAAAGTGAA	0.140765	0
RNA	1	chr5	139214342	+	3	GCAG-AAACTGAGCTCAGAAAAG	GCAGAAACTGAGCTCAGAAAAG	GCAGCATAGTGAGCCCAGAANRG	GCAGCATAGTGAGCCCAGAANRG				0	0	0	0	45.22	0	0	0	GATGCAGAAACTGAGCTCAGAAAAGTTGA	0.135619	0
RNA	1	chr5	130723514	+	3	GCAG-ATAGTGAGGGCAAAAGAG	GCAGATAGTGAGGGCAAAAGAG	GCAGCATAGTGAGCCCAGAANRG	GCAGCATAGTGAGCCCAGAANRG				0	0	0	0	40.5	0	0	0	TAGGCAGATAGTGAGGGCAAAAGAGTCCT	0.137377	0
RNA	1	chr5	130313325	+	3	GCAG-AAAGGGAGCCCAAAAGAG	GCAGAAAGGGAGCCCAAAAGAG	GCAGCATAGTGAGCCCAGAANRG	GCAGCATAGTGAGCCCAGAANRG				0	0	0	0	42.97	0	0	0	ATAGCAGAAAGGGAGCCCAAAAGAGGGTT	0.171917	0
RNA	1	chr5	113847524	+	3	GCAG-ATAGTGAGGGCAAAAGAG	GCAGATAGTGAGGGCAAAAGAG	GCAGCATAGTGAGCCCAGAANRG	GCAGCATAGTGAGCCCAGAANRG				0	0	0	0	40.5	0	0	0	TAGGCAGATAGTGAGGGCAAAAGAGTCCT	0.137377	0
DNA	1	chr4	18109286	-	3	GCACCATAGTGTGACCATGAACAG	GCACCATAGTGTGACCATGAACAG	GCAGCATAGTGAGCCCA-GAANRG	GCAGCATAGTGAGCCCAGAANRG				0	0	0	0	41.43	0	0	0	TGGCACCATAGTGTGACCATGAACAGAGC	0.119567	0
DNA	1	chr4	171505501	+	3	GCTGCATAGTTAGCCAAAGAAAAG	GCTGCATAGTTAGCCAAAGAAAAG	GCAGCATAGTGAGCCCA-GAANRG	GCAGCATAGTGAGCCCAGAANRG				0	0	0	0	40.55	0	0	0	ACTGCTGCATAGTTAGCCAAAGAAAAGAA	0.035986	0
RNA	1	chr5	112514459	-	3	GCAG-ATAGTGAGGGCAAAAGAG	GCAGATAGTGAGGGCAAAAGAG	GCAGCATAGTGAGCCCAGAANRG	GCAGCATAGTGAGCCCAGAANRG				0	0	0	0	40.5	0	0	0	TTAGGCAGATAGTGAGGGCAAAAGAGTCC	0.0713921	0
DNA	1	chr5	124220624	-	3	GCTGCATAGTGAGCTAAAGAAAAG	GCTGCATAGTGAGCTAAAGAAAAG	GCAGCATAGTGAGC-CCAGAANRG	GCAGCATAGTGAGCCCAGAANRG				0	0	0	0	40.35	0	0	0	TTGCTGCATAGTGAGCTAAAGAAAAGCCT	0.140856	0
DNA	1	chr5	38916936	+	3	GCAGCATGGTGAGAGCCACAATAG	GCAGCATGGTGAGAGCCACAATAG	GCAGCATAGTGAGC-CCAGAANRG	GCAGCATAGTGAGCCCAGAANRG				0	0	0	0	39.23	0	0	0	AAAGCAGCATGGTGAGAGCCACAATAGAA	0.136387	0
DNA	1	chr5	153534074	-	3	GCAGCATAGCAAGCACCAGCATAG	GCAGCATAGCAAGCACCAGCATAG	GCAGCATAGTGAGC-CCAGAANRG	GCAGCATAGTGAGCCCAGAANRG				0	0	0	0	38.6	0	0	0	AGGCAGCATAGCAAGCACCAGCATAGCCC	0.169215	0
DNA	1	chr5	173553883	-	3	GCAGCAAAGTGAGCTCTAAAAGAG	GCAGCAAAGTGAGCTCTAAAAGAG	GCAGCATAGTGAGC-CCAGAANRG	GCAGCATAGTGAGCCCAGAANRG				0	0	0	0	37.57	0	0	0	AGGCAGCAAAGTGAGCTCTAAAAGAGCCT	0.127842	0
DNA	1	chr5	166921787	+	3	GCAAGATAGTGAGCTCCACAAGGG	GCAAGATAGTGAGCTCCACAAGGG	GCAGCATAGTGAGC-CCAGAANRG	GCAGCATAGTGAGCCCAGAANRG				0	0	0	0	40.44	0	0	0	TTTGCAAGATAGTGAGCTCCACAAGGGCA	0.165002	0
DNA	1	chr5	173863583	-	3	GCTGCATGAATGAGCCCAGCAGAG	GCTGCATGAATGAGCCCAGCAGAG	GCAGCAT-AGTGAGCCCAGAANRG	GCAGCATAGTGAGCCCAGAANRG				0	0	0	0	40.78	0	0	0	TGGCTGCATGAATGAGCCCAGCAGAGCCT	0.101491	0
DNA	1	chr5	142834565	-	2	GCTGCACAAGTGAGCCCAGAAGAG	GCTGCACAAGTGAGCCCAGAAGAG	GCAGCAT-AGTGAGCCCAGAANRG	GCAGCATAGTGAGCCCAGAANRG				0	0	0	0	47.05	0	0	0	TAGCTGCACAAGTGAGCCCAGAAGAGGAC	0.3335	0
DNA	1	chr5	175210702	+	3	GCAGCAAGAGTGAGGCCAGATGGG	GCAGCAAGAGTGAGGCCAGATGGG	GCAGCAT-AGTGAGCCCAGAANRG	GCAGCATAGTGAGCCCAGAANRG				0	0	0	0	45.3	0	0	0	AAAGCAGCAAGAGTGAGGCCAGATGGGTT	0.132688	0
DNA	1	chr5	169238033	-	3	ACAGAATAGCGAGCCCAGAAATAG	ACAGAATAGCGAGCCCAGAAATAG	GCAGCATAGTGAGCCCAG-AANRG	GCAGCATAGTGAGCCCAGAANRG				0	0	0	0	41.89	0	0	0	GGACAGAATAGCGAGCCCAGAAATAGACC	0.148696	0
DNA	1	chr5	164872723	+	3	GCAGGATAGAGAGTCCAGAAATAG	GCAGGATAGAGAGTCCAGAAATAG	GCAGCATAGTGAGCCCAG-AANRG	GCAGCATAGTGAGCCCAGAANRG				0	0	0	0	40.71	0	0	0	GGAGCAGGATAGAGAGTCCAGAAATAGAT	0.473371	0
DNA	1	chr5	157412202	+	3	GCAGAATAGACAGCCCAGAAATAG	GCAGAATAGACAGCCCAGAAATAG	GCAGCATAGTGAGCCCAG-AANRG	GCAGCATAGTGAGCCCAGAANRG				0	0	0	0	41.31	0	0	0	GGAGCAGAATAGACAGCCCAGAAATAGGA	0.469694	0
DNA	1	chr5	140618076	+	3	ACAGAATAGAGAGCCCAGAAACAG	ACAGAATAGAGAGCCCAGAAACAG	GCAGCATAGTGAGCCCAG-AANRG	GCAGCATAGTGAGCCCAGAANRG				0	0	0	0	41.89	0	0	0	GGAACAGAATAGAGAGCCCAGAAACAGAC	0.359547	0
DNA	1	chr5	135610139	+	3	CCAGCATGGAGAGCCCAGGAAAGG	CCAGCATGGAGAGCCCAGGAAAGG	GCAGCATAGTGAGCCCAG-AANRG	GCAGCATAGTGAGCCCAGAANRG				0	0	0	0	41.81	0	0	0	GCTCCAGCATGGAGAGCCCAGGAAAGGGG	0.173543	0
DNA	1	chr5	134492317	-	3	TCAGAAGAGTGAGCCCAGAAAAGG	TCAGAAGAGTGAGCCCAGAAAAGG	GCAGCATAGTGAGCCCAG-AANRG	GCAGCATAGTGAGCCCAGAANRG				0	0	0	0	42.16	0	0	0	CTTCAGAAGAGTGAGCCCAGAAAAGGTGG	0.179507	0
DNA	1	chr5	96543880	-	3	ACAGAATAGAGAGCCCAGAAACAG	ACAGAATAGAGAGCCCAGAAACAG	GCAGCATAGTGAGCCCAG-AANRG	GCAGCATAGTGAGCCCAGAANRG				0	0	0	0	41.89	0	0	0	GAACAGAATAGAGAGCCCAGAAACAGATT	0.131011	0
DNA	1	chr5	87632488	+	3	GCAGAATAGAAAGCCCAGAAACAG	GCAGAATAGAAAGCCCAGAAACAG	GCAGCATAGTGAGCCCAG-AANRG	GCAGCATAGTGAGCCCAGAANRG				0	0	0	0	41.31	0	0	0	GTGGCAGAATAGAAAGCCCAGAAACAGAC	0.372397	0
DNA	1	chr5	84621248	+	3	ACAGGATAGAGAGCCCAGAAATAG	ACAGGATAGAGAGCCCAGAAATAG	GCAGCATAGTGAGCCCAG-AANRG	GCAGCATAGTGAGCCCAGAANRG				0	0	0	0	41.89	0	0	0	GAAACAGGATAGAGAGCCCAGAAATAGAC	0.457402	0
DNA	1	chr5	84442715	+	3	ACAGAATAGAGAGCCCAGAAATAG	ACAGAATAGAGAGCCCAGAAATAG	GCAGCATAGTGAGCCCAG-AANRG	GCAGCATAGTGAGCCCAGAANRG				0	0	0	0	41.89	0	0	0	GGAACAGAATAGAGAGCCCAGAAATAGAT	0.460785	0
DNA	1	chr5	78899580	-	3	GCAGCAGAGTGAGCCAAGCAGAGG	GCAGCAGAGTGAGCCAAGCAGAGG	GCAGCATAGTGAGCCCAG-AANRG	GCAGCATAGTGAGCCCAGAANRG				0	0	0	0	40.17	0	0	0	GAGCAGCAGAGTGAGCCAAGCAGAGGAAA	0.211054	0
DNA	1	chr5	76582941	-	3	GCAGCTGAGTGAGGCCAGCAACGG	GCAGCTGAGTGAGGCCAGCAACGG	GCAGCATAGTGAGCCCAG-AANRG	GCAGCATAGTGAGCCCAGAANRG				0	0	0	0	40.96	0	0	0	GTGCAGCTGAGTGAGGCCAGCAACGGAGG	0.198308	0
DNA	1	chr5	45815786	+	3	CCAGAATAGAGAGCCCAGAAATAG	CCAGAATAGAGAGCCCAGAAATAG	GCAGCATAGTGAGCCCAG-AANRG	GCAGCATAGTGAGCCCAGAANRG				0	0	0	0	41.89	0	0	0	AGACCAGAATAGAGAGCCCAGAAATAGAC	0.4437	0
DNA	1	chr5	36097392	-	3	CCAGAATAGAGAGCCCAGAAATAG	CCAGAATAGAGAGCCCAGAAATAG	GCAGCATAGTGAGCCCAG-AANRG	GCAGCATAGTGAGCCCAGAANRG				0	0	0	0	41.89	0	0	0	GACCAGAATAGAGAGCCCAGAAATAGACC	0.10528	0
DNA	1	chr5	35578840	-	3	ACAGAATAGAGAGCCCAGAAATAG	ACAGAATAGAGAGCCCAGAAATAG	GCAGCATAGTGAGCCCAG-AANRG	GCAGCATAGTGAGCCCAGAANRG				0	0	0	0	41.89	0	0	0	GAACAGAATAGAGAGCCCAGAAATAGACT	0.118474	0
RNA	1	chr5	173553885	-	3	GCAGCAAAGTGAGCTCT-AAAAG	GCAGCAAAGTGAGCTCTAAAAG	GCAGCATAGTGAGCCCAGAANRG	GCAGCATAGTGAGCCCAGAANRG				0	0	0	0	38.76	0	0	0	TGAGGCAGCAAAGTGAGCTCTAAAAGAGC	0.0715354	0
RNA	1	chr5	169262481	+	3	GCAGCAGAGTGACACCA-AATGG	GCAGCAGAGTGACACCAAATGG	GCAGCATAGTGAGCCCAGAANRG	GCAGCATAGTGAGCCCAGAANRG				0	0	0	0	41.26	0	0	0	ACGGCAGCAGAGTGACACCAAATGGGATC	0.0684639	0
RNA	1	chr5	163727336	+	3	GCAGAATTGTGAGCCAA-AATGG	GCAGAATTGTGAGCCAAAATGG	GCAGCATAGTGAGCCCAGAANRG	GCAGCATAGTGAGCCCAGAANRG				0	0	0	0	41.13	0	0	0	CCAGCAGAATTGTGAGCCAAAATGGACTG	0.0397819	0
RNA	1	chr5	92945776	-	3	GCAGCACAGAGAGCCCA-CATGG	GCAGCACAGAGAGCCCACATGG	GCAGCATAGTGAGCCCAGAANRG	GCAGCATAGTGAGCCCAGAANRG				0	0	0	0	38.16	0	0	0	CTTGGCAGCACAGAGAGCCCACATGGTGA	0.110344	0
RNA	1	chr5	113240034	-	3	GCAGAATAGG-AGACCAGAAAAG	GCAGAATAGGAGACCAGAAAAG	GCAGCATAGTGAGCCCAGAANRG	GCAGCATAGTGAGCCCAGAANRG				0	0	0	0	45.2	0	0	0	ATTTGCAGAATAGGAGACCAGAAAAGAGT	0.198747	0
RNA	1	chr5	100684794	-	3	GGAGCATAGC-AGCCCAGTATAG	GGAGCATAGCAGCCCAGTATAG	GCAGCATAGTGAGCCCAGAANRG	GCAGCATAGTGAGCCCAGAANRG				0	0	0	0	41.56	0	0	0	TTGTGGAGCATAGCAGCCCAGTATAGCAC	0.0605161	0
RNA	1	chr5	83872137	-	3	GCAGCTTAGT-AGCCCACAGGAG	GCAGCTTAGTAGCCCACAGGAG	GCAGCATAGTGAGCCCAGAANRG	GCAGCATAGTGAGCCCAGAANRG				0	0	0	0	36.98	0	0	0	GGCTGCAGCTTAGTAGCCCACAGGAGAGG	0.0600259	0
RNA	1	chr5	54596016	-	3	CCAGCCTAGT-AGCCAAGAAGAG	CCAGCCTAGTAGCCAAGAAGAG	GCAGCATAGTGAGCCCAGAANRG	GCAGCATAGTGAGCCCAGAANRG				0	0	0	0	44.56	0	0	0	AAGGCCAGCCTAGTAGCCAAGAAGAGATT	0.0536944	0
RNA	1	chr5	38709862	-	3	GCAGCATAGC-AGCCCAGGCTGG	GCAGCATAGCAGCCCAGGCTGG	GCAGCATAGTGAGCCCAGAANRG	GCAGCATAGTGAGCCCAGAANRG				0	0	0	0	35.69	0	0	0	GTGGGCAGCATAGCAGCCCAGGCTGGAAG	0.148164	0
DNA	1	chr4	183490452	-	3	GCAGCAAATTCAGCCACAGAATGG	GCAGCAAATTCAGCCACAGAATGG	GCAGCATAGTGAGCC-CAGAANRG	GCAGCATAGTGAGCCCAGAANRG				0	0	0	0	44.12	0	0	0	CAGCAGCAAATTCAGCCACAGAATGGGAA	0.136008	0
DNA	1	chr4	152108067	-	3	AGAGCATTGTGAGCCTCAGAAGGG	AGAGCATTGTGAGCCTCAGAAGGG	GCAGCATAGTGAGCC-CAGAANRG	GCAGCATAGTGAGCCCAGAANRG				0	0	0	0	44.88	0	0	0	AGAGAGCATTGTGAGCCTCAGAAGGGAAG	0.213862	0
DNA	1	chr4	7139626	-	3	GCAGCTCAGTGGGCCTCAGAAGAG	GCAGCTCAGTGGGCCTCAGAAGAG	GCAGCATAGTGAGCC-CAGAANRG	GCAGCATAGTGAGCCCAGAANRG				0	0	0	0	44.16	0	0	0	AGGCAGCTCAGTGGGCCTCAGAAGAGCAG	0.15601	0
DNA	1	chr4	28797262	+	3	GCAGTATAGGGAGCCACATAAGAG	GCAGTATAGGGAGCCACATAAGAG	GCAGCATAGTGAGCC-CAGAANRG	GCAGCATAGTGAGCCCAGAANRG				0	0	0	0	39.71	0	0	0	ATAGCAGTATAGGGAGCCACATAAGAGCC	0.126849	0
DNA	1	chr4	74511476	-	2	GCAGCAAAGTGAGCATCAGAAAGG	GCAGCAAAGTGAGCATCAGAAAGG	GCAGCATAGTGAGCC-CAGAANRG	GCAGCATAGTGAGCCCAGAANRG				0	0	0	0	43.27	0	0	0	TAGCAGCAAAGTGAGCATCAGAAAGGTAT	0.424445	0
DNA	1	chr4	171505501	+	3	GCTGCATAGTTAGCCAAAGAAAAG	GCTGCATAGTTAGCCAAAGAAAAG	GCAGCATAGTGAGCC-CAGAANRG	GCAGCATAGTGAGCCCAGAANRG				0	0	0	0	41.55	0	0	0	ACTGCTGCATAGTTAGCCAAAGAAAAGAA	0.035986	0
DNA	1	chr4	110308823	+	3	CCAAGCATAGTGGGCCCAGAGGAG	CCAAGCATAGTGGGCCCAGAGGAG	GC-AGCATAGTGAGCCCAGAANRG	GCAGCATAGTGAGCCCAGAANRG				0	0	0	0	46.33	0	0	0	GAGCCAAGCATAGTGGGCCCAGAGGAGAG	0.0792395	0
DNA	1	chr4	59360089	+	3	GCTTGCATAGTGTGCCTAGAAAAG	GCTTGCATAGTGTGCCTAGAAAAG	GC-AGCATAGTGAGCCCAGAANRG	GCAGCATAGTGAGCCCAGAANRG				0	0	0	0	43.28	0	0	0	CCAGCTTGCATAGTGTGCCTAGAAAAGTC	0.0856314	0
DNA	1	chr4	41066733	+	3	GCCTGCAGAGTGAGGCCAGAAAAG	GCCTGCAGAGTGAGGCCAGAAAAG	GC-AGCATAGTGAGCCCAGAANRG	GCAGCATAGTGAGCCCAGAANRG				0	0	0	0	45.21	0	0	0	GAGGCCTGCAGAGTGAGGCCAGAAAAGAA	0.0561711	0
RNA	1	chr4	12376893	+	3	GC-ACATAGTAAGCCCTGAACAG	GCACATAGTAAGCCCTGAACAG	GCAGCATAGTGAGCCCAGAANRG	GCAGCATAGTGAGCCCAGAANRG				0	0	0	0	43.87	0	0	0	AATGCACATAGTAAGCCCTGAACAGATAG	0.175564	0
DNA	1	chr4	120404	+	3	GGAGCCAAACTGAGCCCAGAATAG	GGAGCCAAACTGAGCCCAGAATAG	GCAG-CATAGTGAGCCCAGAANRG	GCAGCATAGTGAGCCCAGAANRG				0	0	0	0	46.61	0	0	0	GAAGGAGCCAAACTGAGCCCAGAATAGCC	0.122947	0
RNA	1	chr4	53324752	+	3	GGAGCATAA-GAGCCCAGCAGAG	GGAGCATAAGAGCCCAGCAGAG	GCAGCATAGTGAGCCCAGAANRG	GCAGCATAGTGAGCCCAGAANRG				0	0	0	0	41.91	0	0	0	CTGGGAGCATAAGAGCCCAGCAGAGGGAA	0.150142	0
RNA	1	chr4	53632255	-	3	GGAGGATGG-GAGCCCAGAAGAG	GGAGGATGGGAGCCCAGAAGAG	GCAGCATAGTGAGCCCAGAANRG	GCAGCATAGTGAGCCCAGAANRG				0	0	0	0	46.8	0	0	0	AAAGGGAGGATGGGAGCCCAGAAGAGAAA	0.0703033	0
RNA	1	chr4	6317451	-	3	GCATCATAG-AACCCCAGAAAGG	GCATCATAGAACCCCAGAAAGG	GCAGCATAGTGAGCCCAGAANRG	GCAGCATAGTGAGCCCAGAANRG				0	0	0	0	45.42	0	0	0	GTTTGCATCATAGAACCCCAGAAAGGCTC	0.121545	0
RNA	1	chr4	7283665	+	3	GCAGCACAG-CAGCTCAGAAAAG	GCAGCACAGCAGCTCAGAAAAG	GCAGCATAGTGAGCCCAGAANRG	GCAGCATAGTGAGCCCAGAANRG				0	0	0	0	44.56	0	0	0	TCTGCAGCACAGCAGCTCAGAAAAGCACT	0.160537	0
RNA	1	chr4	7959955	+	3	GCAGCCTGG-GAACCCAGAAAGG	GCAGCCTGGGAACCCAGAAAGG	GCAGCATAGTGAGCCCAGAANRG	GCAGCATAGTGAGCCCAGAANRG				0	0	0	0	45.81	0	0	0	GGGGCAGCCTGGGAACCCAGAAAGGGGAG	0.171385	0
RNA	1	chr4	14600886	-	3	GCAGCAGAT-GAGTCCAGAAAGG	GCAGCAGATGAGTCCAGAAAGG	GCAGCATAGTGAGCCCAGAANRG	GCAGCATAGTGAGCCCAGAANRG				0	0	0	0	45.51	0	0	0	AGCAGCAGCAGATGAGTCCAGAAAGGGAT	0.27584	0
RNA	1	chr4	33106567	-	2	GCATCATAG-GAGCCAAGAACAG	GCATCATAGGAGCCAAGAACAG	GCAGCATAGTGAGCCCAGAANRG	GCAGCATAGTGAGCCCAGAANRG				0	0	0	0	44.92	0	0	0	TGTTGCATCATAGGAGCCAAGAACAGAAA	0.209714	0
RNA	1	chr4	144609822	-	3	TCATC-TAGAGAGCCCAGAAGAG	TCATCTAGAGAGCCCAGAAGAG	GCAGCATAGTGAGCCCAGAANRG	GCAGCATAGTGAGCCCAGAANRG				0	0	0	0	46.89	0	0	0	ATTCTCATCTAGAGAGCCCAGAAGAGAAT	0.059794	0
RNA	1	chr5	149241211	-	3	GCAACCTC-TGAGCCCAGAACAG	GCAACCTCTGAGCCCAGAACAG	GCAGCATAGTGAGCCCAGAANRG	GCAGCATAGTGAGCCCAGAANRG				0	0	0	0	46.89	0	0	0	AGTTGCAACCTCTGAGCCCAGAACAGTGC	0.0692833	0
RNA	1	chr5	136814884	-	3	GCAGCATG-TGCTCCCAGAAGAG	GCAGCATGTGCTCCCAGAAGAG	GCAGCATAGTGAGCCCAGAANRG	GCAGCATAGTGAGCCCAGAANRG				0	0	0	0	45.37	0	0	0	CCCTGCAGCATGTGCTCCCAGAAGAGACT	0.258563	0
RNA	1	chr5	126097465	-	3	CCAGCATA-TGAGCCCAGCCCAG	CCAGCATATGAGCCCAGCCCAG	GCAGCATAGTGAGCCCAGAANRG	GCAGCATAGTGAGCCCAGAANRG				0	0	0	0	36.42	0	0	0	GATTCCAGCATATGAGCCCAGCCCAGAGT	0.092841	0
RNA	1	chr5	113240034	-	3	GCAGAATA-GGAGACCAGAAAAG	GCAGAATAGGAGACCAGAAAAG	GCAGCATAGTGAGCCCAGAANRG	GCAGCATAGTGAGCCCAGAANRG				0	0	0	0	45.55	0	0	0	ATTTGCAGAATAGGAGACCAGAAAAGAGT	0.198747	0
RNA	1	chr5	104276735	+	3	CCAGGATA-TGATCCCAGAAGAG	CCAGGATATGATCCCAGAAGAG	GCAGCATAGTGAGCCCAGAANRG	GCAGCATAGTGAGCCCAGAANRG				0	0	0	0	46.13	0	0	0	GCACCAGGATATGATCCCAGAAGAGGAGA	0.135617	0
RNA	1	chr5	92840562	-	3	GCAGCATA-TGTGCCAAAAAAAG	GCAGCATATGTGCCAAAAAAAG	GCAGCATAGTGAGCCCAGAANRG	GCAGCATAGTGAGCCCAGAANRG				0	0	0	0	40.44	0	0	0	CTAAGCAGCATATGTGCCAAAAAAAGAAA	0.0657013	0
RNA	1	chr5	81911557	+	3	GCAGCACA-TGGGGCCAGAAGAG	GCAGCACATGGGGCCAGAAGAG	GCAGCATAGTGAGCCCAGAANRG	GCAGCATAGTGAGCCCAGAANRG				0	0	0	0	45.21	0	0	0	CTAGCAGCACATGGGGCCAGAAGAGGCAC	0.158768	0
RNA	1	chr4	13717688	+	3	GAAGCAAAGGGAGCCCA-AAGGG	GAAGCAAAGGGAGCCCAAAGGG	GCAGCATAGTGAGCCCAGAANRG	GCAGCATAGTGAGCCCAGAANRG				0	0	0	0	43.03	0	0	0	TAAGAAGCAAAGGGAGCCCAAAGGGCAAG	0.0878503	0
RNA	1	chr4	97996258	+	3	GCAGAATAGAGAGCCCA-GAAAG	GCAGAATAGAGAGCCCAGAAAG	GCAGCATAGTGAGCCCAGAANRG	GCAGCATAGTGAGCCCAGAANRG				0	0	0	0	38.2	0	0	0	AGAGCAGAATAGAGAGCCCAGAAAGAATG	0.572276	0
DNA	1	chr4	40087941	-	3	GGCAGCATAGTGAGACCAGCCTGG	GGCAGCATAGTGAGACCAGCCTGG	G-CAGCATAGTGAGCCCAGAANRG	GCAGCATAGTGAGCCCAGAANRG				0	0	0	0	39.67	0	0	0	TGGGCAGCATAGTGAGACCAGCCTGGCCA	0.564896	0
DNA	1	chr4	41066733	+	3	GCCTGCAGAGTGAGGCCAGAAAAG	GCCTGCAGAGTGAGGCCAGAAAAG	G-CAGCATAGTGAGCCCAGAANRG	GCAGCATAGTGAGCCCAGAANRG				0	0	0	0	45.23	0	0	0	GAGGCCTGCAGAGTGAGGCCAGAAAAGAA	0.0561711	0
DNA	1	chr4	80734787	-	3	GACAGAATAGAGAACCCAGAAAGG	GACAGAATAGAGAACCCAGAAAGG	G-CAGCATAGTGAGCCCAGAANRG	GCAGCATAGTGAGCCCAGAANRG				0	0	0	0	45.36	0	0	0	TGGACAGAATAGAGAACCCAGAAAGGAAT	0.33875	0
DNA	1	chr4	122925392	-	3	GACAGCAGTGGGAGCCCAGAAAGG	GACAGCAGTGGGAGCCCAGAAAGG	G-CAGCATAGTGAGCCCAGAANRG	GCAGCATAGTGAGCCCAGAANRG				0	0	0	0	46.25	0	0	0	CTGACAGCAGTGGGAGCCCAGAAAGGGAT	0.339482	0
RNA	1	chr4	12376893	+	2	GCA-CATAGTAAGCCCTGAACAG	GCACATAGTAAGCCCTGAACAG	GCAGCATAGTGAGCCCAGAANRG	GCAGCATAGTGAGCCCAGAANRG				0	0	0	0	44.02	0	0	0	AATGCACATAGTAAGCCCTGAACAGATAG	0.175564	0
RNA	1	chr4	146117441	-	3	GTA-CATACTGAACCCAGAAGAG	GTACATACTGAACCCAGAAGAG	GCAGCATAGTGAGCCCAGAANRG	GCAGCATAGTGAGCCCAGAANRG				0	0	0	0	46.14	0	0	0	CCATGTACATACTGAACCCAGAAGAGGGG	0.0746158	0
RNA	1	chr4	66031997	-	3	GCA-CTTAGTGAGCCCAAGACAG	GCACTTAGTGAGCCCAAGACAG	GCAGCATAGTGAGCCCAGAANRG	GCAGCATAGTGAGCCCAGAANRG				0	0	0	0	38.51	0	0	0	CCCAGCACTTAGTGAGCCCAAGACAGGAG	0.0813979	0
DNA	1	chr4	41066733	+	3	GCCTGCAGAGTGAGGCCAGAAAAG	GCCTGCAGAGTGAGGCCAGAAAAG	GCA-GCATAGTGAGCCCAGAANRG	GCAGCATAGTGAGCCCAGAANRG				0	0	0	0	45.21	0	0	0	GAGGCCTGCAGAGTGAGGCCAGAAAAGAA	0.0561711	0
DNA	1	chr4	59360089	+	3	GCTTGCATAGTGTGCCTAGAAAAG	GCTTGCATAGTGTGCCTAGAAAAG	GCA-GCATAGTGAGCCCAGAANRG	GCAGCATAGTGAGCCCAGAANRG				0	0	0	0	43.28	0	0	0	CCAGCTTGCATAGTGTGCCTAGAAAAGTC	0.0856314	0
DNA	1	chr4	110308823	+	3	CCAAGCATAGTGGGCCCAGAGGAG	CCAAGCATAGTGGGCCCAGAGGAG	GCA-GCATAGTGAGCCCAGAANRG	GCAGCATAGTGAGCCCAGAANRG				0	0	0	0	46.31	0	0	0	GAGCCAAGCATAGTGGGCCCAGAGGAGAG	0.0792395	0
DNA	1	chr4	61590791	+	3	GCAGCATTAGTGGAACCAGAAGAG	GCAGCATTAGTGGAACCAGAAGAG	GCAGCAT-AGTGAGCCCAGAANRG	GCAGCATAGTGAGCCCAGAANRG				0	0	0	0	43.13	0	0	0	ATGGCAGCATTAGTGGAACCAGAAGAGAC	0.130049	0
DNA	1	chr4	52894974	-	3	TCAAAATAAGTGAGCCCAGAAAGG	TCAAAATAAGTGAGCCCAGAAAGG	GCAGCAT-AGTGAGCCCAGAANRG	GCAGCATAGTGAGCCCAGAANRG				0	0	0	0	46.95	0	0	0	TTTCAAAATAAGTGAGCCCAGAAAGGCTT	0.214169	0
DNA	1	chr4	25091637	-	3	GCTGCATGAGTGAGCCCAGGTGAG	GCTGCATGAGTGAGCCCAGGTGAG	GCAGCAT-AGTGAGCCCAGAANRG	GCAGCATAGTGAGCCCAGAANRG				0	0	0	0	41.28	0	0	0	CAGCTGCATGAGTGAGCCCAGGTGAGTCC	0.165735	0
DNA	1	chr4	21957268	-	3	GATGCATGAGTGAGCCCAGATGAG	GATGCATGAGTGAGCCCAGATGAG	GCAGCAT-AGTGAGCCCAGAANRG	GCAGCATAGTGAGCCCAGAANRG				0	0	0	0	47.15	0	0	0	CAGATGCATGAGTGAGCCCAGATGAGCAC	0.164983	0
DNA	1	chr4	166172153	-	3	GCAGCCCAGTGAAGCCCAAAATAG	GCAGCCCAGTGAAGCCCAAAATAG	GCAGCATAGTGA-GCCCAGAANRG	GCAGCATAGTGAGCCCAGAANRG				0	0	0	0	41.16	0	0	0	AAGCAGCCCAGTGAAGCCCAAAATAGATG	0.16802	0
DNA	1	chr4	13537364	+	3	GCAGCAGCTGTGAGCCCAGAGCGG	GCAGCAGCTGTGAGCCCAGAGCGG	GCAGCAT-AGTGAGCCCAGAANRG	GCAGCATAGTGAGCCCAGAANRG				0	0	0	0	46.85	0	0	0	TCCGCAGCAGCTGTGAGCCCAGAGCGGTT	0.171321	0
DNA	1	chr4	170631707	+	3	GCAACATGAGTGAGCCCAGTGTAG	GCAACATGAGTGAGCCCAGTGTAG	GCAGCAT-AGTGAGCCCAGAANRG	GCAGCATAGTGAGCCCAGAANRG				0	0	0	0	41.26	0	0	0	TTTGCAACATGAGTGAGCCCAGTGTAGCC	0.173195	0
DNA	1	chr4	162803913	-	3	GCCCCATGAGTGAGCCCAGTAAGG	GCCCCATGAGTGAGCCCAGTAAGG	GCAGCAT-AGTGAGCCCAGAANRG	GCAGCATAGTGAGCCCAGAANRG				0	0	0	0	41.11	0	0	0	CAGCCCCATGAGTGAGCCCAGTAAGGACT	0.204949	0
DNA	1	chr4	83037061	-	3	TCTGCATGAGTGAGCCCAGACAAG	TCTGCATGAGTGAGCCCAGACAAG	GCAGCAT-AGTGAGCCCAGAANRG	GCAGCATAGTGAGCCCAGAANRG				0	0	0	0	47.16	0	0	0	TATCTGCATGAGTGAGCCCAGACAAGACC	0.126902	0
DNA	1	chr4	61878327	+	3	GGAGCATAATTGAGCCCATAACAG	GGAGCATAATTGAGCCCATAACAG	GCAGCAT-AGTGAGCCCAGAANRG	GCAGCATAGTGAGCCCAGAANRG				0	0	0	0	41.8	0	0	0	AGGGGAGCATAATTGAGCCCATAACAGGT	0.084218	0
DNA	1	chr4	155568923	-	3	TCAACATAGTGAGAGCCAGAAGGG	TCAACATAGTGAGAGCCAGAAGGG	GCAGCATAGTGAGC-CCAGAANRG	GCAGCATAGTGAGCCCAGAANRG				0	0	0	0	44.21	0	0	0	AGTCAACATAGTGAGAGCCAGAAGGGCCT	0.210952	0
RNA	1	chr4	12376893	+	3	GCAC-ATAGTAAGCCCTGAACAG	GCACATAGTAAGCCCTGAACAG	GCAGCATAGTGAGCCCAGAANRG	GCAGCATAGTGAGCCCAGAANRG				0	0	0	0	43.83	0	0	0	AATGCACATAGTAAGCCCTGAACAGATAG	0.175564	0
RNA	1	chr4	16676924	+	3	CCAG-ATGGTGAGGCCAGAACAG	CCAGATGGTGAGGCCAGAACAG	GCAGCATAGTGAGCCCAGAANRG	GCAGCATAGTGAGCCCAGAANRG				0	0	0	0	46.01	0	0	0	GTGCCAGATGGTGAGGCCAGAACAGAGAC	0.113008	0
RNA	1	chr4	75923316	+	3	GCAG-ATAGTGAGGGTAGAAGAG	GCAGATAGTGAGGGTAGAAGAG	GCAGCATAGTGAGCCCAGAANRG	GCAGCATAGTGAGCCCAGAANRG				0	0	0	0	42.2	0	0	0	TAGGCAGATAGTGAGGGTAGAAGAGTCCT	0.16258	0
RNA	1	chr4	88440895	-	3	GCAG-ATAGTGAGGGCAAAAGAG	GCAGATAGTGAGGGCAAAAGAG	GCAGCATAGTGAGCCCAGAANRG	GCAGCATAGTGAGCCCAGAANRG				0	0	0	0	40.5	0	0	0	TTAGGCAGATAGTGAGGGCAAAAGAGTCC	0.0713921	0
RNA	1	chr4	119296494	+	3	GCAG-ACAGTAAGCCCAGGAAAG	GCAGACAGTAAGCCCAGGAAAG	GCAGCATAGTGAGCCCAGAANRG	GCAGCATAGTGAGCCCAGAANRG				0	0	0	0	41.77	0	0	0	TCCGCAGACAGTAAGCCCAGGAAAGCCAA	0.215793	0
RNA	1	chr4	125736891	+	3	GAAG-ACAGTGAGCCCAGGAAAG	GAAGACAGTGAGCCCAGGAAAG	GCAGCATAGTGAGCCCAGAANRG	GCAGCATAGTGAGCCCAGAANRG				0	0	0	0	42.34	0	0	0	TTTGAAGACAGTGAGCCCAGGAAAGGGCC	0.181581	0
RNA	1	chr4	132782122	+	3	GCTG-ATAGTGTGCCTAGAACAG	GCTGATAGTGTGCCTAGAACAG	GCAGCATAGTGAGCCCAGAANRG	GCAGCATAGTGAGCCCAGAANRG				0	0	0	0	44.45	0	0	0	TTTGCTGATAGTGTGCCTAGAACAGGGCC	0.133281	0
RNA	1	chr4	154760187	-	3	ACAG-ATAGTCAGCCCATAACAG	ACAGATAGTCAGCCCATAACAG	GCAGCATAGTGAGCCCAGAANRG	GCAGCATAGTGAGCCCAGAANRG				0	0	0	0	42.88	0	0	0	ATACACAGATAGTCAGCCCATAACAGATA	0.080779	0
DNA	1	chr4	74511476	-	2	GCAGCAAAGTGAGCATCAGAAAGG	GCAGCAAAGTGAGCATCAGAAAGG	GCAGCATAGTGAGC-CCAGAANRG	GCAGCATAGTGAGCCCAGAANRG				0	0	0	0	43.27	0	0	0	TAGCAGCAAAGTGAGCATCAGAAAGGTAT	0.424445	0
DNA	1	chr4	4834005	+	3	ACAGCATAGAGAGTCCAGAAATGG	ACAGCATAGAGAGTCCAGAAATGG	GCAGCATAGTGAGCCCAG-AANRG	GCAGCATAGTGAGCCCAGAANRG				0	0	0	0	40.78	0	0	0	GTAACAGCATAGAGAGTCCAGAAATGGAG	0.56482	0
DNA	1	chr4	42804278	-	3	ACAGAATAGCGAGCCCAGAAATAG	ACAGAATAGCGAGCCCAGAAATAG	GCAGCATAGTGAGCCCAG-AANRG	GCAGCATAGTGAGCCCAGAANRG				0	0	0	0	41.89	0	0	0	GAACAGAATAGCGAGCCCAGAAATAGACC	0.147187	0
DNA	1	chr4	45799049	-	3	ACAGAATAGAGAGCCCAGAAATAG	ACAGAATAGAGAGCCCAGAAATAG	GCAGCATAGTGAGCCCAG-AANRG	GCAGCATAGTGAGCCCAGAANRG				0	0	0	0	41.89	0	0	0	AAACAGAATAGAGAGCCCAGAAATAGACC	0.116496	0
DNA	1	chr4	97684399	+	3	ACAGAATAGGGAGCCCAGAAATAG	ACAGAATAGGGAGCCCAGAAATAG	GCAGCATAGTGAGCCCAG-AANRG	GCAGCATAGTGAGCCCAGAANRG				0	0	0	0	41.89	0	0	0	GGAACAGAATAGGGAGCCCAGAAATAGAC	0.459556	0
DNA	1	chr4	108054326	+	3	GCAGCGTAGTGAGTGCAGTAACAG	GCAGCGTAGTGAGTGCAGTAACAG	GCAGCATAGTGAGCCCAG-AANRG	GCAGCATAGTGAGCCCAGAANRG				0	0	0	0	39.29	0	0	0	GAAGCAGCGTAGTGAGTGCAGTAACAGCA	0.226363	0
DNA	1	chr4	145683561	+	3	GTAGAATAGAGAGCCCAGAAATAG	GTAGAATAGAGAGCCCAGAAATAG	GCAGCATAGTGAGCCCAG-AANRG	GCAGCATAGTGAGCCCAGAANRG				0	0	0	0	41.88	0	0	0	GAAGTAGAATAGAGAGCCCAGAAATAGGT	0.462868	0
DNA	1	chr4	157278290	+	3	ACAGAATAGAGAGCCCAGCAATAG	ACAGAATAGAGAGCCCAGCAATAG	GCAGCATAGTGAGCCCAG-AANRG	GCAGCATAGTGAGCCCAGAANRG				0	0	0	0	41.89	0	0	0	GGAACAGAATAGAGAGCCCAGCAATAGAC	0.287507	0
DNA	1	chr4	161669459	+	3	GCAGAATAGAGAGGCCAGAAATAG	GCAGAATAGAGAGGCCAGAAATAG	GCAGCATAGTGAGCCCAG-AANRG	GCAGCATAGTGAGCCCAGAANRG				0	0	0	0	40.71	0	0	0	GGGGCAGAATAGAGAGGCCAGAAATAGAA	0.462883	0
DNA	1	chr4	165157075	+	3	ACAGAATAGTGAACCCAGAAATAG	ACAGAATAGTGAACCCAGAAATAG	GCAGCATAGTGAGCCCAG-AANRG	GCAGCATAGTGAGCCCAGAANRG				0	0	0	0	41.29	0	0	0	GGAACAGAATAGTGAACCCAGAAATAGAG	0.529746	0
DNA	1	chr4	165291648	-	3	ACAGAATAGAGAGCCCAGAAAGAG	ACAGAATAGAGAGCCCAGAAAGAG	GCAGCATAGTGAGCCCAG-AANRG	GCAGCATAGTGAGCCCAGAANRG				0	0	0	0	41.89	0	0	0	CAACAGAATAGAGAGCCCAGAAAGAGACC	0.126291	0
DNA	1	chr4	174056484	-	3	ACAGAATAGAGAGCCCAGAAATAG	ACAGAATAGAGAGCCCAGAAATAG	GCAGCATAGTGAGCCCAG-AANRG	GCAGCATAGTGAGCCCAGAANRG				0	0	0	0	41.89	0	0	0	GAACAGAATAGAGAGCCCAGAAATAGAGC	0.122859	0
DNA	1	chr4	175867571	-	3	ACAGAATAGAGAGCCCAGAAATAG	ACAGAATAGAGAGCCCAGAAATAG	GCAGCATAGTGAGCCCAG-AANRG	GCAGCATAGTGAGCCCAGAANRG				0	0	0	0	41.89	0	0	0	GAACAGAATAGAGAGCCCAGAAATAGCCC	0.110663	0
RNA	1	chr5	174319931	+	3	ACAGCATAG-GAGCCCAATAAAG	ACAGCATAGGAGCCCAATAAAG	GCAGCATAGTGAGCCCAGAANRG	GCAGCATAGTGAGCCCAGAANRG				0	0	0	0	38.27	0	0	0	CACACAGCATAGGAGCCCAATAAAGTTCC	0.169691	0
RNA	1	chr5	173798395	+	3	GGAGTATAG-GAGCACAGAAAGG	GGAGTATAGGAGCACAGAAAGG	GCAGCATAGTGAGCCCAGAANRG	GCAGCATAGTGAGCCCAGAANRG				0	0	0	0	45.17	0	0	0	GAGGGAGTATAGGAGCACAGAAAGGAAAG	0.124974	0
RNA	1	chr5	171230193	+	3	GTGCCATAG-GAGCCCAGAAGAG	GTGCCATAGGAGCCCAGAAGAG	GCAGCATAGTGAGCCCAGAANRG	GCAGCATAGTGAGCCCAGAANRG				0	0	0	0	46.94	0	0	0	AGAGTGCCATAGGAGCCCAGAAGAGATTT	0.178831	0
RNA	1	chr5	155115088	-	3	GCTGCACAG-GAGCCCAGAGTGG	GCTGCACAGGAGCCCAGAGTGG	GCAGCATAGTGAGCCCAGAANRG	GCAGCATAGTGAGCCCAGAANRG				0	0	0	0	41.01	0	0	0	TCCAGCTGCACAGGAGCCCAGAGTGGAGG	0.111057	0
RNA	1	chr5	142289309	+	3	TCAGCATAG-GAGTCGAGAAAAG	TCAGCATAGGAGTCGAGAAAAG	GCAGCATAGTGAGCCCAGAANRG	GCAGCATAGTGAGCCCAGAANRG				0	0	0	0	43.67	0	0	0	ATATCAGCATAGGAGTCGAGAAAAGCCAG	0.137433	0
RNA	1	chr5	117058952	-	3	CAAGCATAG-GAGACCAGAACAG	CAAGCATAGGAGACCAGAACAG	GCAGCATAGTGAGCCCAGAANRG	GCAGCATAGTGAGCCCAGAANRG				0	0	0	0	45.84	0	0	0	TAACCAAGCATAGGAGACCAGAACAGTAA	0.0747835	0
RNA	1	chr5	114245860	-	3	GCAGCACAG-GAGAGCAGAAAAG	GCAGCACAGGAGAGCAGAAAAG	GCAGCATAGTGAGCCCAGAANRG	GCAGCATAGTGAGCCCAGAANRG				0	0	0	0	43.96	0	0	0	AGAGGCAGCACAGGAGAGCAGAAAAGAGT	0.0857471	0
RNA	1	chr5	113240034	-	2	GCAGAATAG-GAGACCAGAAAAG	GCAGAATAGGAGACCAGAAAAG	GCAGCATAGTGAGCCCAGAANRG	GCAGCATAGTGAGCCCAGAANRG				0	0	0	0	45.9	0	0	0	ATTTGCAGAATAGGAGACCAGAAAAGAGT	0.198747	0
RNA	1	chr5	100684794	-	3	GGAGCATAG-CAGCCCAGTATAG	GGAGCATAGCAGCCCAGTATAG	GCAGCATAGTGAGCCCAGAANRG	GCAGCATAGTGAGCCCAGAANRG				0	0	0	0	41.56	0	0	0	TTGTGGAGCATAGCAGCCCAGTATAGCAC	0.0605161	0
RNA	1	chr5	74040356	+	3	ACAGCACAG-GAGCCCAGCATGG	ACAGCACAGGAGCCCAGCATGG	GCAGCATAGTGAGCCCAGAANRG	GCAGCATAGTGAGCCCAGAANRG				0	0	0	0	42.04	0	0	0	TCCACAGCACAGGAGCCCAGCATGGTGAG	0.151112	0
RNA	1	chr5	38709862	-	3	GCAGCATAG-CAGCCCAGGCTGG	GCAGCATAGCAGCCCAGGCTGG	GCAGCATAGTGAGCCCAGAANRG	GCAGCATAGTGAGCCCAGAANRG				0	0	0	0	35.69	0	0	0	GTGGGCAGCATAGCAGCCCAGGCTGGAAG	0.148164	0
RNA	1	chr4	14600886	-	2	GCAGCAGA-TGAGTCCAGAAAGG	GCAGCAGATGAGTCCAGAAAGG	GCAGCATAGTGAGCCCAGAANRG	GCAGCATAGTGAGCCCAGAANRG				0	0	0	0	46.01	0	0	0	AGCAGCAGCAGATGAGTCCAGAAAGGGAT	0.27584	0
RNA	1	chr4	33106567	-	3	GCATCATA-GGAGCCAAGAACAG	GCATCATAGGAGCCAAGAACAG	GCAGCATAGTGAGCCCAGAANRG	GCAGCATAGTGAGCCCAGAANRG				0	0	0	0	44.57	0	0	0	TGTTGCATCATAGGAGCCAAGAACAGAAA	0.209714	0
RNA	1	chr4	53324752	+	3	GGAGCATA-AGAGCCCAGCAGAG	GGAGCATAAGAGCCCAGCAGAG	GCAGCATAGTGAGCCCAGAANRG	GCAGCATAGTGAGCCCAGAANRG				0	0	0	0	41.91	0	0	0	CTGGGAGCATAAGAGCCCAGCAGAGGGAA	0.150142	0
RNA	1	chr4	75971781	+	3	GCATCACT-TGAGCCCAGAAGGG	GCATCACTTGAGCCCAGAAGGG	GCAGCATAGTGAGCCCAGAANRG	GCAGCATAGTGAGCCCAGAANRG				0	0	0	0	46.87	0	0	0	GGAGCATCACTTGAGCCCAGAAGGGGGAA	0.195453	0
RNA	1	chr4	86267570	-	3	GCAGCAGA-TGAGGCCAGGAGAG	GCAGCAGATGAGGCCAGGAGAG	GCAGCATAGTGAGCCCAGAANRG	GCAGCATAGTGAGCCCAGAANRG				0	0	0	0	41.01	0	0	0	AATGGCAGCAGATGAGGCCAGGAGAGGCA	0.0657029	0
RNA	1	chr5	159300069	-	3	GG-GAAAAGTGAGCCCAGAAAGG	GGGAAAAGTGAGCCCAGAAAGG	GCAGCATAGTGAGCCCAGAANRG	GCAGCATAGTGAGCCCAGAANRG				0	0	0	0	47.19	0	0	0	ATGAGGGAAAAGTGAGCCCAGAAAGGAAC	0.112202	0
DNA	1	chr4	47460688	-	3	GCAACATAGTGAGACCCTCAAAAG	GCAACATAGTGAGACCCTCAAAAG	GCAGCATAGTGAG-CCCAGAANRG	GCAGCATAGTGAGCCCAGAANRG				0	0	0	0	37.23	0	0	0	GGGCAACATAGTGAGACCCTCAAAAGAAA	0.135404	0
DNA	1	chr4	74511476	-	3	GCAGCAAAGTGAGCATCAGAAAGG	GCAGCAAAGTGAGCATCAGAAAGG	GCAGCATAGTGAG-CCCAGAANRG	GCAGCATAGTGAGCCCAGAANRG				0	0	0	0	41.97	0	0	0	TAGCAGCAAAGTGAGCATCAGAAAGGTAT	0.424445	0
DNA	1	chr4	155568923	-	3	TCAACATAGTGAGAGCCAGAAGGG	TCAACATAGTGAGAGCCAGAAGGG	GCAGCATAGTGAG-CCCAGAANRG	GCAGCATAGTGAGCCCAGAANRG				0	0	0	0	44.21	0	0	0	AGTCAACATAGTGAGAGCCAGAAGGGCCT	0.210952	0
DNA	1	chr4	61878327	+	3	GGAGCATAATTGAGCCCATAACAG	GGAGCATAATTGAGCCCATAACAG	GCAGCATAGT-GAGCCCAGAANRG	GCAGCATAGTGAGCCCAGAANRG				0	0	0	0	41.52	0	0	0	AGGGGAGCATAATTGAGCCCATAACAGGT	0.084218	0
DNA	1	chr4	67414582	-	3	GCAGCATTGTTTAGCCCAAAATGG	GCAGCATTGTTTAGCCCAAAATGG	GCAGCATAGT-GAGCCCAGAANRG	GCAGCATAGTGAGCCCAGAANRG				0	0	0	0	40.93	0	0	0	TGGCAGCATTGTTTAGCCCAAAATGGAAG	0.198642	0
DNA	1	chr4	90512246	-	2	GCACCATAGTAGAACCCAGAAAAG	GCACCATAGTAGAACCCAGAAAAG	GCAGCATAGT-GAGCCCAGAANRG	GCAGCATAGTGAGCCCAGAANRG				0	0	0	0	45.53	0	0	0	AGGCACCATAGTAGAACCCAGAAAAGGAG	0.33527	0
RNA	1	chr5	170554498	+	3	GCAGC-TCTTGAGGCCAGAAGAG	GCAGCTCTTGAGGCCAGAAGAG	GCAGCATAGTGAGCCCAGAANRG	GCAGCATAGTGAGCCCAGAANRG				0	0	0	0	45.76	0	0	0	GGAGCAGCTCTTGAGGCCAGAAGAGTGGG	0.123768	0
RNA	1	chr5	145997300	+	3	GCAGC-TAGTGAAACCAGAGCAG	GCAGCTAGTGAAACCAGAGCAG	GCAGCATAGTGAGCCCAGAANRG	GCAGCATAGTGAGCCCAGAANRG				0	0	0	0	39.28	0	0	0	AAAGCAGCTAGTGAAACCAGAGCAGCTCC	0.141524	0
RNA	1	chr5	88998730	+	3	GCAAC-TAGTGAGCTCGGAAGAG	GCAACTAGTGAGCTCGGAAGAG	GCAGCATAGTGAGCCCAGAANRG	GCAGCATAGTGAGCCCAGAANRG				0	0	0	0	42.61	0	0	0	TAAGCAACTAGTGAGCTCGGAAGAGGACC	0.153601	0
RNA	1	chr5	32794154	+	3	GCAGC-TACAGAGACCAGAATAG	GCAGCTACAGAGACCAGAATAG	GCAGCATAGTGAGCCCAGAANRG	GCAGCATAGTGAGCCCAGAANRG				0	0	0	0	45.53	0	0	0	CTAGCAGCTACAGAGACCAGAATAGAGAT	0.132527	0
RNA	1	chr4	189722553	-	3	CCTGCAAAGTG-GCCCAGAATGG	CCTGCAAAGTGGCCCAGAATGG	GCAGCATAGTGAGCCCAGAANRG	GCAGCATAGTGAGCCCAGAANRG				0	0	0	0	46.59	0	0	0	AGCTCCTGCAAAGTGGCCCAGAATGGTGG	0.0668905	0
RNA	1	chr4	108684680	+	3	GCAGACAAGTG-GCCCAGAAAAG	GCAGACAAGTGGCCCAGAAAAG	GCAGCATAGTGAGCCCAGAANRG	GCAGCATAGTGAGCCCAGAANRG				0	0	0	0	46.46	0	0	0	AGTGCAGACAAGTGGCCCAGAAAAGGAAT	0.150568	0
RNA	1	chr4	6317451	-	3	GCATCATAGA-ACCCCAGAAAGG	GCATCATAGAACCCCAGAAAGG	GCAGCATAGTGAGCCCAGAANRG	GCAGCATAGTGAGCCCAGAANRG				0	0	0	0	45.42	0	0	0	GTTTGCATCATAGAACCCCAGAAAGGCTC	0.121545	0
RNA	1	chr4	7283665	+	3	GCAGCACAGC-AGCTCAGAAAAG	GCAGCACAGCAGCTCAGAAAAG	GCAGCATAGTGAGCCCAGAANRG	GCAGCATAGTGAGCCCAGAANRG				0	0	0	0	44.56	0	0	0	TCTGCAGCACAGCAGCTCAGAAAAGCACT	0.160537	0
RNA	1	chr4	33106567	-	3	GCATCATAGG-AGCCAAGAACAG	GCATCATAGGAGCCAAGAACAG	GCAGCATAGTGAGCCCAGAANRG	GCAGCATAGTGAGCCCAGAANRG				0	0	0	0	44.22	0	0	0	TGTTGCATCATAGGAGCCAAGAACAGAAA	0.209714	0
RNA	1	chr4	154256730	-	3	TCAGTATAGT-AGCCCAGGAGAG	TCAGTATAGTAGCCCAGGAGAG	GCAGCATAGTGAGCCCAGAANRG	GCAGCATAGTGAGCCCAGAANRG				0	0	0	0	41.88	0	0	0	TTCATCAGTATAGTAGCCCAGGAGAGAGA	0.0718741	0
RNA	1	chr4	164189375	-	3	GCCTCATAGT-AGACCAGAACAG	GCCTCATAGTAGACCAGAACAG	GCAGCATAGTGAGCCCAGAANRG	GCAGCATAGTGAGCCCAGAANRG				0	0	0	0	45.57	0	0	0	ACAGGCCTCATAGTAGACCAGAACAGATC	0.0764841	0
RNA	1	chr4	175161770	-	3	GCAGCATTGT-AGCCAACAAAGG	GCAGCATTGTAGCCAACAAAGG	GCAGCATAGTGAGCCCAGAANRG	GCAGCATAGTGAGCCCAGAANRG				0	0	0	0	40.62	0	0	0	GTCAGCAGCATTGTAGCCAACAAAGGAAC	0.0867809	0
RNA	1	chr5	177527746	-	3	GCATCATAGTGA-CCTGGAATAG	GCATCATAGTGACCTGGAATAG	GCAGCATAGTGAGCCCAGAANRG	GCAGCATAGTGAGCCCAGAANRG				0	0	0	0	41.32	0	0	0	GAGTGCATCATAGTGACCTGGAATAGCAT	0.0724694	0
RNA	1	chr4	7090105	+	3	G-AGCTTAGGGAGGCCAGAAAAG	GAGCTTAGGGAGGCCAGAAAAG	GCAGCATAGTGAGCCCAGAANRG	GCAGCATAGTGAGCCCAGAANRG				0	0	0	0	45.75	0	0	0	GAAGAGCTTAGGGAGGCCAGAAAAGACCC	0.123875	0
RNA	1	chr4	15421391	+	3	G-AGCATAGAGAACCCAGGATAG	GAGCATAGAGAACCCAGGATAG	GCAGCATAGTGAGCCCAGAANRG	GCAGCATAGTGAGCCCAGAANRG				0	0	0	0	41.16	0	0	0	GAGGAGCATAGAGAACCCAGGATAGTCAA	0.0529396	0
RNA	1	chr4	52131017	+	3	G-AGCACAGAGAGCCCAGCACAG	GAGCACAGAGAGCCCAGCACAG	GCAGCATAGTGAGCCCAGAANRG	GCAGCATAGTGAGCCCAGAANRG				0	0	0	0	42.03	0	0	0	ATCGAGCACAGAGAGCCCAGCACAGGTCT	0.121248	0
RNA	1	chr4	93665125	-	3	G-ACCATAGTAAACCCAGAAAAG	GACCATAGTAAACCCAGAAAAG	GCAGCATAGTGAGCCCAGAANRG	GCAGCATAGTGAGCCCAGAANRG				0	0	0	0	45.79	0	0	0	TACTGACCATAGTAAACCCAGAAAAGGAA	0.0375532	0
RNA	1	chr4	110308825	+	3	A-AGCATAGTGGGCCCAGAGGAG	AAGCATAGTGGGCCCAGAGGAG	GCAGCATAGTGAGCCCAGAANRG	GCAGCATAGTGAGCCCAGAANRG				0	0	0	0	40.84	0	0	0	GCCAAGCATAGTGGGCCCAGAGGAGAGCA	0.122647	0
RNA	1	chr5	146139387	-	3	TTAGCATTGTGA-CCCAGAAGAG	TTAGCATTGTGACCCAGAAGAG	GCAGCATAGTGAGCCCAGAANRG	GCAGCATAGTGAGCCCAGAANRG				0	0	0	0	46.27	0	0	0	GAGCTTAGCATTGTGACCCAGAAGAGTTT	0.0604962	0
RNA	1	chr5	144818148	+	3	GCAGGCTAGAGA-CCCAGAAGAG	GCAGGCTAGAGACCCAGAAGAG	GCAGCATAGTGAGCCCAGAANRG	GCAGCATAGTGAGCCCAGAANRG				0	0	0	0	45.89	0	0	0	CAGGCAGGCTAGAGACCCAGAAGAGCTGA	0.156306	0
RNA	1	chr5	123475879	+	3	GTAGCCCAGTGA-CCCAGAAAGG	GTAGCCCAGTGACCCAGAAAGG	GCAGCATAGTGAGCCCAGAANRG	GCAGCATAGTGAGCCCAGAANRG				0	0	0	0	46.22	0	0	0	AAAGTAGCCCAGTGACCCAGAAAGGGATA	0.153675	0
RNA	1	chr5	99997805	-	3	ACAGCAAAATGA-CCCAGAAGAG	ACAGCAAAATGACCCAGAAGAG	GCAGCATAGTGAGCCCAGAANRG	GCAGCATAGTGAGCCCAGAANRG				0	0	0	0	46.09	0	0	0	ACGAACAGCAAAATGACCCAGAAGAGAAT	0.104628	0
RNA	1	chr5	74671043	+	3	CCAGCAAAGTGA-CCGAGAAAAG	CCAGCAAAGTGACCGAGAAAAG	GCAGCATAGTGAGCCCAGAANRG	GCAGCATAGTGAGCCCAGAANRG				0	0	0	0	44.14	0	0	0	CAGCCAGCAAAGTGACCGAGAAAAGTCCT	0.130041	0
RNA	1	chr5	44225976	+	3	GTAGGCTAGTGA-CCCAGAAAAG	GTAGGCTAGTGACCCAGAAAAG	GCAGCATAGTGAGCCCAGAANRG	GCAGCATAGTGAGCCCAGAANRG				0	0	0	0	46.26	0	0	0	TTTGTAGGCTAGTGACCCAGAAAAGCCAT	0.129929	0
RNA	1	chr5	31460149	-	3	TCAGCATAATGA-CTCAGAAGAG	TCAGCATAATGACTCAGAAGAG	GCAGCATAGTGAGCCCAGAANRG	GCAGCATAGTGAGCCCAGAANRG				0	0	0	0	44.42	0	0	0	AAATTCAGCATAATGACTCAGAAGAGGAA	0.0645389	0
RNA	1	chr5	16406359	+	3	GCAGCCTAGAGA-CCCAGGAAAG	GCAGCCTAGAGACCCAGGAAAG	GCAGCATAGTGAGCCCAGAANRG	GCAGCATAGTGAGCCCAGAANRG				0	0	0	0	41.08	0	0	0	CGGGCAGCCTAGAGACCCAGGAAAGAATT	0.0495115	0
RNA	1	chr5	1797527	-	3	GCAGCAGGGTCA-CCCAGAAAGG	GCAGCAGGGTCACCCAGAAAGG	GCAGCATAGTGAGCCCAGAANRG	GCAGCATAGTGAGCCCAGAANRG				0	0	0	0	45.59	0	0	0	GGGCGCAGCAGGGTCACCCAGAAAGGCCT	0.123105	0
DNA	1	chr4	61590791	+	3	GCAGCATTAGTGGAACCAGAAGAG	GCAGCATTAGTGGAACCAGAAGAG	GCAGCA-TAGTGAGCCCAGAANRG	GCAGCATAGTGAGCCCAGAANRG				0	0	0	0	43.17	0	0	0	ATGGCAGCATTAGTGGAACCAGAAGAGAC	0.130049	0
DNA	1	chr4	13537364	+	3	GCAGCAGCTGTGAGCCCAGAGCGG	GCAGCAGCTGTGAGCCCAGAGCGG	GCAGCA-TAGTGAGCCCAGAANRG	GCAGCATAGTGAGCCCAGAANRG				0	0	0	0	46.85	0	0	0	TCCGCAGCAGCTGTGAGCCCAGAGCGGTT	0.171321	0
DNA	1	chr4	175867571	-	3	ACAGAATAGAGAGCCCAGAAATAG	ACAGAATAGAGAGCCCAGAAATAG	GCAGCATAGTGAGCCCAGA-ANRG	GCAGCATAGTGAGCCCAGAANRG				0	0	0	0	40.89	0	0	0	GAACAGAATAGAGAGCCCAGAAATAGCCC	0.110663	0
DNA	1	chr4	174056484	-	3	ACAGAATAGAGAGCCCAGAAATAG	ACAGAATAGAGAGCCCAGAAATAG	GCAGCATAGTGAGCCCAGA-ANRG	GCAGCATAGTGAGCCCAGAANRG				0	0	0	0	40.89	0	0	0	GAACAGAATAGAGAGCCCAGAAATAGAGC	0.122859	0
DNA	1	chr4	165291648	-	3	ACAGAATAGAGAGCCCAGAAAGAG	ACAGAATAGAGAGCCCAGAAAGAG	GCAGCATAGTGAGCCCAGA-ANRG	GCAGCATAGTGAGCCCAGAANRG				0	0	0	0	40.89	0	0	0	CAACAGAATAGAGAGCCCAGAAAGAGACC	0.126291	0
DNA	1	chr4	165157075	+	3	ACAGAATAGTGAACCCAGAAATAG	ACAGAATAGTGAACCCAGAAATAG	GCAGCATAGTGAGCCCAGA-ANRG	GCAGCATAGTGAGCCCAGAANRG				0	0	0	0	40.29	0	0	0	GGAACAGAATAGTGAACCCAGAAATAGAG	0.529746	0
DNA	1	chr4	161669459	+	3	GCAGAATAGAGAGGCCAGAAATAG	GCAGAATAGAGAGGCCAGAAATAG	GCAGCATAGTGAGCCCAGA-ANRG	GCAGCATAGTGAGCCCAGAANRG				0	0	0	0	39.71	0	0	0	GGGGCAGAATAGAGAGGCCAGAAATAGAA	0.462883	0
DNA	1	chr4	145683561	+	3	GTAGAATAGAGAGCCCAGAAATAG	GTAGAATAGAGAGCCCAGAAATAG	GCAGCATAGTGAGCCCAGA-ANRG	GCAGCATAGTGAGCCCAGAANRG				0	0	0	0	40.88	0	0	0	GAAGTAGAATAGAGAGCCCAGAAATAGGT	0.462868	0
DNA	1	chr4	97684399	+	3	ACAGAATAGGGAGCCCAGAAATAG	ACAGAATAGGGAGCCCAGAAATAG	GCAGCATAGTGAGCCCAGA-ANRG	GCAGCATAGTGAGCCCAGAANRG				0	0	0	0	40.89	0	0	0	GGAACAGAATAGGGAGCCCAGAAATAGAC	0.459556	0
DNA	1	chr4	93562854	-	3	ACAGAATAGAGAGCCCAGATATAG	ACAGAATAGAGAGCCCAGATATAG	GCAGCATAGTGAGCCCAGA-ANRG	GCAGCATAGTGAGCCCAGAANRG				0	0	0	0	40.89	0	0	0	GAACAGAATAGAGAGCCCAGATATAGACT	0.130894	0
DNA	1	chr4	45799049	-	3	ACAGAATAGAGAGCCCAGAAATAG	ACAGAATAGAGAGCCCAGAAATAG	GCAGCATAGTGAGCCCAGA-ANRG	GCAGCATAGTGAGCCCAGAANRG				0	0	0	0	40.89	0	0	0	AAACAGAATAGAGAGCCCAGAAATAGACC	0.116496	0
DNA	1	chr4	42804278	-	3	ACAGAATAGCGAGCCCAGAAATAG	ACAGAATAGCGAGCCCAGAAATAG	GCAGCATAGTGAGCCCAGA-ANRG	GCAGCATAGTGAGCCCAGAANRG				0	0	0	0	40.89	0	0	0	GAACAGAATAGCGAGCCCAGAAATAGACC	0.147187	0
DNA	1	chr4	4834005	+	3	ACAGCATAGAGAGTCCAGAAATGG	ACAGCATAGAGAGTCCAGAAATGG	GCAGCATAGTGAGCCCAGA-ANRG	GCAGCATAGTGAGCCCAGAANRG				0	0	0	0	39.78	0	0	0	GTAACAGCATAGAGAGTCCAGAAATGGAG	0.56482	0
DNA	1	chr4	1678400	+	3	GCAGAACAGAGAGCCCAGATATAG	GCAGAACAGAGAGCCCAGATATAG	GCAGCATAGTGAGCCCAGA-ANRG	GCAGCATAGTGAGCCCAGAANRG				0	0	0	0	40.78	0	0	0	CAGGCAGAACAGAGAGCCCAGATATAGAA	0.316931	0
DNA	1	chr5	67914757	+	3	GCAGCCAAGTGAGGCCCAGGAAGG	GCAGCCAAGTGAGGCCCAGGAAGG	GCAGCATAGTGAG-CCCAGAANRG	GCAGCATAGTGAGCCCAGAANRG				0	0	0	0	39.96	0	0	0	AATGCAGCCAAGTGAGGCCCAGGAAGGCT	0.111274	0
DNA	1	chr5	38916936	+	3	GCAGCATGGTGAGAGCCACAATAG	GCAGCATGGTGAGAGCCACAATAG	GCAGCATAGTGAG-CCCAGAANRG	GCAGCATAGTGAGCCCAGAANRG				0	0	0	0	39.23	0	0	0	AAAGCAGCATGGTGAGAGCCACAATAGAA	0.136387	0
DNA	1	chr5	9176441	+	3	GCAGCCTAGTGAAACCCTGAACGG	GCAGCCTAGTGAAACCCTGAACGG	GCAGCATAGTGAG-CCCAGAANRG	GCAGCATAGTGAGCCCAGAANRG				0	0	0	0	41.09	0	0	0	ATTGCAGCCTAGTGAAACCCTGAACGGAG	0.100359	0
DNA	1	chr5	142834565	-	3	GCTGCACAAGTGAGCCCAGAAGAG	GCTGCACAAGTGAGCCCAGAAGAG	GCAGCATAG-TGAGCCCAGAANRG	GCAGCATAGTGAGCCCAGAANRG				0	0	0	0	46.47	0	0	0	TAGCTGCACAAGTGAGCCCAGAAGAGGAC	0.3335	0
RNA	1	chr4	9592430	+	3	GCAGTATTGTGA-CCCTGAATAG	GCAGTATTGTGACCCTGAATAG	GCAGCATAGTGAGCCCAGAANRG	GCAGCATAGTGAGCCCAGAANRG				0	0	0	0	43.33	0	0	0	GTTGCAGTATTGTGACCCTGAATAGAAGA	0.111113	0
RNA	1	chr4	9714212	-	3	GCAGCATGGTGA-CACAAAACAG	GCAGCATGGTGACACAAAACAG	GCAGCATAGTGAGCCCAGAANRG	GCAGCATAGTGAGCCCAGAANRG				0	0	0	0	40.62	0	0	0	GGGGGCAGCATGGTGACACAAAACAGGAG	0.0746629	0
RNA	1	chr4	90074620	-	3	GCAGCATAGAGA-CACAGCATAG	GCAGCATAGAGACACAGCATAG	GCAGCATAGTGAGCCCAGAANRG	GCAGCATAGTGAGCCCAGAANRG				0	0	0	0	39.39	0	0	0	AAGAGCAGCATAGAGACACAGCATAGACA	0.0628504	0
RNA	1	chr4	108486127	-	3	GGAGCAGAGTGA-ACCAGAAGGG	GGAGCAGAGTGAACCAGAAGGG	GCAGCATAGTGAGCCCAGAANRG	GCAGCATAGTGAGCCCAGAANRG				0	0	0	0	45.13	0	0	0	TCTGGGAGCAGAGTGAACCAGAAGGGGCT	0.114628	0
RNA	1	chr4	137892659	+	3	GCAGCTGAGTGA-ACCAGAAAAG	GCAGCTGAGTGAACCAGAAAAG	GCAGCATAGTGAGCCCAGAANRG	GCAGCATAGTGAGCCCAGAANRG				0	0	0	0	45.05	0	0	0	ATTGCAGCTGAGTGAACCAGAAAAGTCTA	0.142023	0
RNA	1	chr5	159300069	-	3	G-GGAAAAGTGAGCCCAGAAAGG	GGGAAAAGTGAGCCCAGAAAGG	GCAGCATAGTGAGCCCAGAANRG	GCAGCATAGTGAGCCCAGAANRG				0	0	0	0	47.19	0	0	0	ATGAGGGAAAAGTGAGCCCAGAAAGGAAC	0.112202	0
RNA	1	chr5	142069899	+	3	G-ATCATAGTGAGACCAGAGTGG	GATCATAGTGAGACCAGAGTGG	GCAGCATAGTGAGCCCAGAANRG	GCAGCATAGTGAGCCCAGAANRG				0	0	0	0	40.29	0	0	0	AGTGATCATAGTGAGACCAGAGTGGGTAA	0.104128	0
RNA	1	chr5	134492318	-	3	C-AGAAGAGTGAGCCCAGAAAAG	CAGAAGAGTGAGCCCAGAAAAG	GCAGCATAGTGAGCCCAGAANRG	GCAGCATAGTGAGCCCAGAANRG				0	0	0	0	47.22	0	0	0	GCTTCAGAAGAGTGAGCCCAGAAAAGGTG	0.334207	0
RNA	1	chr5	121980869	-	3	G-AGCAGGGTAAGCCCAGAAGGG	GAGCAGGGTAAGCCCAGAAGGG	GCAGCATAGTGAGCCCAGAANRG	GCAGCATAGTGAGCCCAGAANRG				0	0	0	0	46.56	0	0	0	GAGAGAGCAGGGTAAGCCCAGAAGGGAGA	0.154599	0
RNA	1	chr5	36394724	+	3	G-ATCAAAGTGAGCCCTGAAGAG	GATCAAAGTGAGCCCTGAAGAG	GCAGCATAGTGAGCCCAGAANRG	GCAGCATAGTGAGCCCAGAANRG				0	0	0	0	44.36	0	0	0	GAAGATCAAAGTGAGCCCTGAAGAGTCAG	0.105928	0
RNA	1	chr5	20304590	+	3	G-AGCTTAATGAGCCCAAAACAG	GAGCTTAATGAGCCCAAAACAG	GCAGCATAGTGAGCCCAGAANRG	GCAGCATAGTGAGCCCAGAANRG				0	0	0	0	43.2	0	0	0	ACAGAGCTTAATGAGCCCAAAACAGAGCT	0.158022	0
RNA	1	chr5	39358387	+	3	G-AGCAGAGTGAGCCAAAAAGAG	GAGCAGAGTGAGCCAAAAAGAG	GCAGCATAGTGAGCCCAGAANRG	GCAGCATAGTGAGCCCAGAANRG				0	0	0	0	41.23	0	0	0	TTAGAGCAGAGTGAGCCAAAAAGAGAGTG	0.153003	0
DNA	1	chr4	12352283	-	3	CCAGGATGGATGAGCCCAGAAAAG	CCAGGATGGATGAGCCCAGAAAAG	GCAGCATAG-TGAGCCCAGAANRG	GCAGCATAGTGAGCCCAGAANRG				0	0	0	0	46.62	0	0	0	AACCAGGATGGATGAGCCCAGAAAAGTCA	0.112752	0
DNA	1	chr4	24225013	+	3	GCAGCAGAGATGAGCACAGAGAGG	GCAGCAGAGATGAGCACAGAGAGG	GCAGCATAG-TGAGCCCAGAANRG	GCAGCATAGTGAGCCCAGAANRG				0	0	0	0	44.67	0	0	0	AATGCAGCAGAGATGAGCACAGAGAGGGA	0.13871	0
DNA	1	chr4	61878327	+	3	GGAGCATAATTGAGCCCATAACAG	GGAGCATAATTGAGCCCATAACAG	GCAGCATAG-TGAGCCCAGAANRG	GCAGCATAGTGAGCCCAGAANRG				0	0	0	0	41.72	0	0	0	AGGGGAGCATAATTGAGCCCATAACAGGT	0.084218	0
DNA	1	chr4	67414582	-	3	GCAGCATTGTTTAGCCCAAAATGG	GCAGCATTGTTTAGCCCAAAATGG	GCAGCATAG-TGAGCCCAGAANRG	GCAGCATAGTGAGCCCAGAANRG				0	0	0	0	41.13	0	0	0	TGGCAGCATTGTTTAGCCCAAAATGGAAG	0.198642	0
DNA	1	chr4	78876501	-	3	TCAGCATATCTGAGCCAAGAATAG	TCAGCATATCTGAGCCAAGAATAG	GCAGCATAG-TGAGCCCAGAANRG	GCAGCATAGTGAGCCCAGAANRG				0	0	0	0	43.73	0	0	0	CTTCAGCATATCTGAGCCAAGAATAGGAT	0.108995	0
DNA	1	chr4	90512246	-	3	GCACCATAGTAGAACCCAGAAAAG	GCACCATAGTAGAACCCAGAAAAG	GCAGCATAG-TGAGCCCAGAANRG	GCAGCATAGTGAGCCCAGAANRG				0	0	0	0	45.03	0	0	0	AGGCACCATAGTAGAACCCAGAAAAGGAG	0.33527	0
DNA	1	chr4	172799299	-	3	GCAGCATAGATTAGTCAAGAATAG	GCAGCATAGATTAGTCAAGAATAG	GCAGCATAG-TGAGCCCAGAANRG	GCAGCATAGTGAGCCCAGAANRG				0	0	0	0	41.5	0	0	0	CTGCAGCATAGATTAGTCAAGAATAGCTT	0.103314	0
DNA	1	chr4	74511476	-	3	GCAGCAAAGTGAGCATCAGAAAGG	GCAGCAAAGTGAGCATCAGAAAGG	GCAGCATAGTGAGCCC-AGAANRG	GCAGCATAGTGAGCCCAGAANRG				0	0	0	0	40.27	0	0	0	TAGCAGCAAAGTGAGCATCAGAAAGGTAT	0.424445	0
DNA	1	chr4	57689419	+	3	GAAGCATAGAGAGCCCTAGTAAAG	GAAGCATAGAGAGCCCTAGTAAAG	GCAGCATAGTGAGCCC-AGAANRG	GCAGCATAGTGAGCCCAGAANRG				0	0	0	0	38.07	0	0	0	ACAGAAGCATAGAGAGCCCTAGTAAAGTT	0.113479	0
DNA	1	chr4	171505501	+	3	GCTGCATAGTTAGCCAAAGAAAAG	GCTGCATAGTTAGCCAAAGAAAAG	GCAGCATAGTGAGCCC-AGAANRG	GCAGCATAGTGAGCCCAGAANRG				0	0	0	0	41.55	0	0	0	ACTGCTGCATAGTTAGCCAAAGAAAAGAA	0.035986	0
DNA	1	chr5	115105093	+	3	GCAGAGTAGCTGAGCCCAGCAAGG	GCAGAGTAGCTGAGCCCAGCAAGG	GCAGCATAG-TGAGCCCAGAANRG	GCAGCATAGTGAGCCCAGAANRG				0	0	0	0	40.8	0	0	0	AGTGCAGAGTAGCTGAGCCCAGCAAGGAA	0.114506	0
DNA	1	chr3	71139232	-	3	TCAGACAGTGTGAGCCCAGAACAG	TCAGACAGTGTGAGCCCAGAACAG	GCAG-CATAGTGAGCCCAGAANRG	GCAGCATAGTGAGCCCAGAANRG				0	0	0	0	46.77	0	0	0	ATTCAGACAGTGTGAGCCCAGAACAGAGG	0.123999	0
DNA	1	chr3	46373151	-	3	GGCAGCATAGTGAGCCCAGAAGGG	GGCAGCATAGTGAGCCCAGAAGGG	GCAG-CATAGTGAGCCCAGAANRG	GCAGCATAGTGAGCCCAGAANRG				0	0	0	0	47.06	0	0	0	GCGGCAGCATAGTGAGCCCAGAAGGGGAC	0.943055	0
DNA	1	chr3	23445157	-	3	GTTGACATAGTGAGCCCATAATAG	GTTGACATAGTGAGCCCATAATAG	GCAG-CATAGTGAGCCCAGAANRG	GCAGCATAGTGAGCCCAGAANRG				0	0	0	0	42.23	0	0	0	GAGTTGACATAGTGAGCCCATAATAGAGT	0.134535	0
DNA	1	chr3	11092200	+	4	GGAGCCATAGGGAGCCGAGAGCAG	GGAGCCATAGGGAGCCGAGAGCAG	GCAG-CATAGTGAGCCCAGAANRG	GCAGCATAGTGAGCCCAGAANRG				0	0	0	0	43.68	0	0	0	CACGGAGCCATAGGGAGCCGAGAGCAGGC	0.106026	0
DNA	1	chr3	10251250	+	4	GATGGAGTAGTGAGCCCAGAATGG	GATGGAGTAGTGAGCCCAGAATGG	GCAG-CATAGTGAGCCCAGAANRG	GCAGCATAGTGAGCCCAGAANRG				0	0	0	0	46.79	0	0	0	TATGATGGAGTAGTGAGCCCAGAATGGAG	0.109406	0
DNA	1	chr3	5205602	-	4	GCAACCAAAGTGAGCCTGGAAGGG	GCAACCAAAGTGAGCCTGGAAGGG	GCAG-CATAGTGAGCCCAGAANRG	GCAGCATAGTGAGCCCAGAANRG				0	0	0	0	40.07	0	0	0	CAGCAACCAAAGTGAGCCTGGAAGGGGAT	0.0512546	0
DNA	1	chr3	1294791	-	3	GCATTATAGGGAGCCCAGAGAAGG	GCATTATAGGGAGCCCAGAGAAGG	GCAGCATAGTGAGCCCAGA-ANRG	GCAGCATAGTGAGCCCAGAANRG				0	0	0	0	40.84	0	0	0	AGGCATTATAGGGAGCCCAGAGAAGGAGC	0.235875	0
DNA	1	chr3	35532061	+	3	ACAGAATAGAGAGCCCAGAAAGAG	ACAGAATAGAGAGCCCAGAAAGAG	GCAGCATAGTGAGCCCAGA-ANRG	GCAGCATAGTGAGCCCAGAANRG				0	0	0	0	40.89	0	0	0	TGAACAGAATAGAGAGCCCAGAAAGAGAC	0.424347	0
DNA	1	chr3	44354237	-	3	ACAGAATAGAGAGCCCAGAAATAG	ACAGAATAGAGAGCCCAGAAATAG	GCAGCATAGTGAGCCCAGA-ANRG	GCAGCATAGTGAGCCCAGAANRG				0	0	0	0	40.89	0	0	0	AAACAGAATAGAGAGCCCAGAAATAGATT	0.116676	0
DNA	1	chr3	46373150	-	1	GCAGCATAGTGAGCCCAGAAGGGG	GCAGCATAGTGAGCCCAGAAGGGG	GCAGCATAGTGAGCCCAGA-ANRG	GCAGCATAGTGAGCCCAGAANRG				0	0	0	0	41.7	0	0	0	CGGCAGCATAGTGAGCCCAGAAGGGGACA	0.710145	0
DNA	1	chr3	190135499	+	3	ACAGAATAGAGAGCCCAGAAATAG	ACAGAATAGAGAGCCCAGAAATAG	GCAGCATAGTGAGCCCAGA-ANRG	GCAGCATAGTGAGCCCAGAANRG				0	0	0	0	40.89	0	0	0	GGAACAGAATAGAGAGCCCAGAAATAGAC	0.453381	0
DNA	1	chr3	148591169	+	3	ACAGAATAGAGAGCCCAGATATAG	ACAGAATAGAGAGCCCAGATATAG	GCAGCATAGTGAGCCCAGA-ANRG	GCAGCATAGTGAGCCCAGAANRG				0	0	0	0	40.89	0	0	0	GGAACAGAATAGAGAGCCCAGATATAGAC	0.315317	0
DNA	1	chr3	136557286	+	3	GCAGAATAGAGAACCCAGAAAAAG	GCAGAATAGAGAACCCAGAAAAAG	GCAGCATAGTGAGCCCAGA-ANRG	GCAGCATAGTGAGCCCAGAANRG				0	0	0	0	39.91	0	0	0	TTAGCAGAATAGAGAACCCAGAAAAAGAC	0.343242	0
DNA	1	chr3	130613335	-	3	ACAGAATAGAGAGCCCAGAAATAG	ACAGAATAGAGAGCCCAGAAATAG	GCAGCATAGTGAGCCCAGA-ANRG	GCAGCATAGTGAGCCCAGAANRG				0	0	0	0	40.89	0	0	0	GAACAGAATAGAGAGCCCAGAAATAGAGC	0.122859	0
DNA	1	chr3	122474495	+	3	ACAGAATAGAGAGCCCAGAAATAG	ACAGAATAGAGAGCCCAGAAATAG	GCAGCATAGTGAGCCCAGA-ANRG	GCAGCATAGTGAGCCCAGAANRG				0	0	0	0	40.89	0	0	0	GAAACAGAATAGAGAGCCCAGAAATAGAC	0.454716	0
DNA	1	chr3	88819615	-	3	GAAGTATAATGAGCCCAGATATAG	GAAGTATAATGAGCCCAGATATAG	GCAGCATAGTGAGCCCAGA-ANRG	GCAGCATAGTGAGCCCAGAANRG				0	0	0	0	41.03	0	0	0	AAGAAGTATAATGAGCCCAGATATAGGCC	0.129323	0
DNA	1	chr3	82525994	-	3	GCAGAATAGAGAACCCAGATATAG	GCAGAATAGAGAACCCAGATATAG	GCAGCATAGTGAGCCCAGA-ANRG	GCAGCATAGTGAGCCCAGAANRG				0	0	0	0	39.91	0	0	0	GAGCAGAATAGAGAACCCAGATATAGATC	0.119645	0
DNA	1	chr3	75074648	-	3	GCAGAATAGAGAGCCCAGAATTAG	GCAGAATAGAGAGCCCAGAATTAG	GCAGCATAGTGAGCCCAGA-ANRG	GCAGCATAGTGAGCCCAGAANRG				0	0	0	0	41.01	0	0	0	GAGCAGAATAGAGAGCCCAGAATTAGACC	0.313838	0
DNA	1	chr3	73689984	-	3	ACAGAATAGAGAGCCCAGAAATAG	ACAGAATAGAGAGCCCAGAAATAG	GCAGCATAGTGAGCCCAGA-ANRG	GCAGCATAGTGAGCCCAGAANRG				0	0	0	0	40.89	0	0	0	GAACAGAATAGAGAGCCCAGAAATAGACT	0.118474	0
DNA	1	chr3	57411991	+	3	ACAGAATAGAGAGCCCAGATATAG	ACAGAATAGAGAGCCCAGATATAG	GCAGCATAGTGAGCCCAGA-ANRG	GCAGCATAGTGAGCCCAGAANRG				0	0	0	0	40.89	0	0	0	GGAACAGAATAGAGAGCCCAGATATAGAC	0.315317	0
DNA	1	chr3	49447895	+	3	GCGACATAGTGAGGCCAGACACGG	GCGACATAGTGAGGCCAGACACGG	GCAGCATAGTGAGCCCAGA-ANRG	GCAGCATAGTGAGCCCAGAANRG				0	0	0	0	40.08	0	0	0	TGGGCGACATAGTGAGGCCAGACACGGTG	0.287107	0
DNA	1	chr3	46782293	+	2	GCAGAATAGTAAGCCCAGAAATAG	GCAGAATAGTAAGCCCAGAAATAG	GCAGCATAGTGAGCCCAGA-ANRG	GCAGCATAGTGAGCCCAGAANRG				0	0	0	0	40.81	0	0	0	AAAGCAGAATAGTAAGCCCAGAAATAGAC	0.733888	0
DNA	1	chr3	147397633	+	3	GCAGCATCGTGTGCGCAGAGATGG	GCAGCATCGTGTGCGCAGAGATGG	GCAGCATAGTGAGCCCAGA-ANRG	GCAGCATAGTGAGCCCAGAANRG				0	0	0	0	38.73	0	0	0	TGGGCAGCATCGTGTGCGCAGAGATGGCG	0.283742	0
DNA	1	chr3	10251250	+	3	GATGGAGTAGTGAGCCCAGAATGG	GATGGAGTAGTGAGCCCAGAATGG	GCAGCA-TAGTGAGCCCAGAANRG	GCAGCATAGTGAGCCCAGAANRG				0	0	0	0	47	0	0	0	TATGATGGAGTAGTGAGCCCAGAATGGAG	0.109406	0
DNA	1	chr3	46357811	-	3	GCAGCAGAGTGAGCCCACAATGGG	GCAGCAGAGTGAGCCCACAATGGG	GCAGCATAGTGAGCCCAGA-ANRG	GCAGCATAGTGAGCCCAGAANRG				0	0	0	0	37.47	0	0	0	TTGCAGCAGAGTGAGCCCACAATGGGAGA	0.418973	0
DNA	1	chr3	53118756	+	3	GCAGCAGCACTGACCCCAGAAGAG	GCAGCAGCACTGACCCCAGAAGAG	GCAGCA-TAGTGAGCCCAGAANRG	GCAGCATAGTGAGCCCAGAANRG				0	0	0	0	45.4	0	0	0	TGGGCAGCAGCACTGACCCCAGAAGAGCC	0.140175	0
RNA	1	chr3	123210031	+	3	GCA-GAAAGTGAGGCCAGAAAGG	GCAGAAAGTGAGGCCAGAAAGG	GCAGCATAGTGAGCCCAGAANRG	GCAGCATAGTGAGCCCAGAANRG				0	0	0	0	46	0	0	0	GTTGCAGAAAGTGAGGCCAGAAAGGTAGG	0.15569	0
RNA	1	chr3	46373151	-	3	CAG-CATAGTGAGCCCAGAAGGG	CAGCATAGTGAGCCCAGAAGGG	GCAGCATAGTGAGCCCAGAANRG	GCAGCATAGTGAGCCCAGAANRG				0	0	0	0	47.32	0	0	0	GCGGCAGCATAGTGAGCCCAGAAGGGGAC	0.943055	0
RNA	1	chr3	41796871	+	3	GCA-CAAAAGGAGCCCAGAACGG	GCACAAAAGGAGCCCAGAACGG	GCAGCATAGTGAGCCCAGAANRG	GCAGCATAGTGAGCCCAGAANRG				0	0	0	0	46.64	0	0	0	AAAGCACAAAAGGAGCCCAGAACGGTACG	0.143893	0
RNA	1	chr3	39266235	+	3	TCA-AATAGTGAGTCCAGAAGGG	TCAAATAGTGAGTCCAGAAGGG	GCAGCATAGTGAGCCCAGAANRG	GCAGCATAGTGAGCCCAGAANRG				0	0	0	0	46.11	0	0	0	TTATCAAATAGTGAGTCCAGAAGGGCAAA	0.126646	0
RNA	1	chr3	23445157	-	3	TGA-CATAGTGAGCCCATAATAG	TGACATAGTGAGCCCATAATAG	GCAGCATAGTGAGCCCAGAANRG	GCAGCATAGTGAGCCCAGAANRG				0	0	0	0	43.47	0	0	0	GAGTTGACATAGTGAGCCCATAATAGAGT	0.134535	0
RNA	1	chr3	181450402	-	3	GCA-CATAGTAAGCACTGAATGG	GCACATAGTAAGCACTGAATGG	GCAGCATAGTGAGCCCAGAANRG	GCAGCATAGTGAGCCCAGAANRG				0	0	0	0	42.12	0	0	0	TAGGGCACATAGTAAGCACTGAATGGGTT	0.0797877	0
DNA	1	chr3	166676847	-	4	GCTTGCATTGTGAGCCTGGAAAAG	GCTTGCATTGTGAGCCTGGAAAAG	GC-AGCATAGTGAGCCCAGAANRG	GCAGCATAGTGAGCCCAGAANRG				0	0	0	0	40.03	0	0	0	CAGCTTGCATTGTGAGCCTGGAAAAGCCG	0.0359962	0
DNA	1	chr3	157859492	+	4	GGGAGCAGAGTGAGCCCATACAAG	GGGAGCAGAGTGAGCCCATACAAG	GC-AGCATAGTGAGCCCAGAANRG	GCAGCATAGTGAGCCCAGAANRG				0	0	0	0	42.15	0	0	0	CTGGGGAGCAGAGTGAGCCCATACAAGAA	0.0544067	0
DNA	1	chr3	149693645	+	4	GACAGAATAGAGAACCCAGAATAG	GACAGAATAGAGAACCCAGAATAG	GC-AGCATAGTGAGCCCAGAANRG	GCAGCATAGTGAGCCCAGAANRG				0	0	0	0	45.21	0	0	0	TGGGACAGAATAGAGAACCCAGAATAGAG	0.120955	0
DNA	1	chr3	141255590	-	4	GCCAGGATTCTGAGCCCAGAGCGG	GCCAGGATTCTGAGCCCAGAGCGG	GC-AGCATAGTGAGCCCAGAANRG	GCAGCATAGTGAGCCCAGAANRG				0	0	0	0	46.49	0	0	0	CAGCCAGGATTCTGAGCCCAGAGCGGGAC	0.0671256	0
DNA	1	chr3	131739974	+	4	TCAAGAATAGTAAGCACAGAATGG	TCAAGAATAGTAAGCACAGAATGG	GC-AGCATAGTGAGCCCAGAANRG	GCAGCATAGTGAGCCCAGAANRG				0	0	0	0	44.12	0	0	0	TTTTCAAGAATAGTAAGCACAGAATGGGA	0.0871753	0
DNA	1	chr3	111341636	+	4	GCTTGCATCGTGCACCCAGAAAAG	GCTTGCATCGTGCACCCAGAAAAG	GC-AGCATAGTGAGCCCAGAANRG	GCAGCATAGTGAGCCCAGAANRG				0	0	0	0	44.63	0	0	0	TGAGCTTGCATCGTGCACCCAGAAAAGCT	0.0744348	0
DNA	1	chr3	108842331	-	4	GGTAGCATAGTTAGCAAAGAAAGG	GGTAGCATAGTTAGCAAAGAAAGG	GC-AGCATAGTGAGCCCAGAANRG	GCAGCATAGTGAGCCCAGAANRG				0	0	0	0	41.32	0	0	0	TAGGTAGCATAGTTAGCAAAGAAAGGAAA	0.270892	0
DNA	1	chr3	82017286	+	4	GCCAGCATGGTGTGTCCAGAGAAG	GCCAGCATGGTGTGTCCAGAGAAG	GC-AGCATAGTGAGCCCAGAANRG	GCAGCATAGTGAGCCCAGAANRG				0	0	0	0	44.2	0	0	0	TAAGCCAGCATGGTGTGTCCAGAGAAGTG	0.0544336	0
DNA	1	chr3	78035840	+	4	ACCAGTAAAGTGATCCCAGAAGAG	ACCAGTAAAGTGATCCCAGAAGAG	GC-AGCATAGTGAGCCCAGAANRG	GCAGCATAGTGAGCCCAGAANRG				0	0	0	0	45.65	0	0	0	GGGACCAGTAAAGTGATCCCAGAAGAGAA	0.0771312	0
DNA	1	chr3	72089798	+	4	GGCAGCATAGGGAGACCAAAAAAG	GGCAGCATAGGGAGACCAAAAAAG	GC-AGCATAGTGAGCCCAGAANRG	GCAGCATAGTGAGCCCAGAANRG				0	0	0	0	39.82	0	0	0	CTGGGCAGCATAGGGAGACCAAAAAAGAA	0.169311	0
DNA	1	chr3	178990048	-	4	GCTTGCATCATGTGCCCAGAAAAG	GCTTGCATCATGTGCCCAGAAAAG	GC-AGCATAGTGAGCCCAGAANRG	GCAGCATAGTGAGCCCAGAANRG				0	0	0	0	45.43	0	0	0	CAGCTTGCATCATGTGCCCAGAAAAGACA	0.0381969	0
DNA	1	chr3	63878827	+	4	GCCAGAAAAGGGAGCCCAGAGCAG	GCCAGAAAAGGGAGCCCAGAGCAG	GC-AGCATAGTGAGCCCAGAANRG	GCAGCATAGTGAGCCCAGAANRG				0	0	0	0	46.37	0	0	0	ACTGCCAGAAAAGGGAGCCCAGAGCAGGG	0.0652719	0
DNA	1	chr3	59960187	+	4	GGGAGCATGGTGAGATCAGAATGG	GGGAGCATGGTGAGATCAGAATGG	GC-AGCATAGTGAGCCCAGAANRG	GCAGCATAGTGAGCCCAGAANRG				0	0	0	0	42.87	0	0	0	ACAGGGAGCATGGTGAGATCAGAATGGAG	0.0646907	0
DNA	1	chr3	48961030	+	4	GAGAGCATATAGAGGCCAGAAAGG	GAGAGCATATAGAGGCCAGAAAGG	GC-AGCATAGTGAGCCCAGAANRG	GCAGCATAGTGAGCCCAGAANRG				0	0	0	0	44.32	0	0	0	CCTGAGAGCATATAGAGGCCAGAAAGGCT	0.0649261	0
DNA	1	chr3	46373151	-	1	GGCAGCATAGTGAGCCCAGAAGGG	GGCAGCATAGTGAGCCCAGAAGGG	GC-AGCATAGTGAGCCCAGAANRG	GCAGCATAGTGAGCCCAGAANRG				0	0	0	0	47.42	0	0	0	GCGGCAGCATAGTGAGCCCAGAAGGGGAC	0.943055	0
DNA	1	chr3	46357812	-	4	TGCAGCAGAGTGAGCCCACAATGG	TGCAGCAGAGTGAGCCCACAATGG	GC-AGCATAGTGAGCCCAGAANRG	GCAGCATAGTGAGCCCAGAANRG				0	0	0	0	42.03	0	0	0	TTTGCAGCAGAGTGAGCCCACAATGGGAG	0.726654	0
DNA	1	chr3	42455149	-	4	GCTTGCAATGTGTGCCCAGAATAG	GCTTGCAATGTGTGCCCAGAATAG	GC-AGCATAGTGAGCCCAGAANRG	GCAGCATAGTGAGCCCAGAANRG				0	0	0	0	45.66	0	0	0	CAGCTTGCAATGTGTGCCCAGAATAGCCA	0.0251855	0
DNA	1	chr3	39668630	+	4	TAAAGCATAGTGAGGCAAGAAAAG	TAAAGCATAGTGAGGCAAGAAAAG	GC-AGCATAGTGAGCCCAGAANRG	GCAGCATAGTGAGCCCAGAANRG				0	0	0	0	42.4	0	0	0	ACGTAAAGCATAGTGAGGCAAGAAAAGAG	0.0592658	0
DNA	1	chr3	38886237	+	4	CCTAACACAGAGAGCCCAGAATAG	CCTAACACAGAGAGCCCAGAATAG	GC-AGCATAGTGAGCCCAGAANRG	GCAGCATAGTGAGCCCAGAANRG				0	0	0	0	46.27	0	0	0	AGGCCTAACACAGAGAGCCCAGAATAGAA	0.12066	0
DNA	1	chr3	23445157	-	4	GTTGACATAGTGAGCCCATAATAG	GTTGACATAGTGAGCCCATAATAG	GC-AGCATAGTGAGCCCAGAANRG	GCAGCATAGTGAGCCCAGAANRG				0	0	0	0	42.06	0	0	0	GAGTTGACATAGTGAGCCCATAATAGAGT	0.134535	0
DNA	1	chr3	19805373	+	4	GCCATCATACTGAACACAGAAAAG	GCCATCATACTGAACACAGAAAAG	GC-AGCATAGTGAGCCCAGAANRG	GCAGCATAGTGAGCCCAGAANRG				0	0	0	0	43.26	0	0	0	GCCGCCATCATACTGAACACAGAAAAGCT	0.070069	0
DNA	1	chr3	19075219	+	4	GCTTGCATCCTGAGCCTAGAAAAG	GCTTGCATCCTGAGCCTAGAAAAG	GC-AGCATAGTGAGCCCAGAANRG	GCAGCATAGTGAGCCCAGAANRG				0	0	0	0	43.53	0	0	0	GAAGCTTGCATCCTGAGCCTAGAAAAGCT	0.0725107	0
DNA	1	chr3	60297629	-	3	GCCAGCACAGTGAGCCAAGGAAAG	GCCAGCACAGTGAGCCAAGGAAAG	GC-AGCATAGTGAGCCCAGAANRG	GCAGCATAGTGAGCCCAGAANRG				0	0	0	0	38.28	0	0	0	TTGCCAGCACAGTGAGCCAAGGAAAGGAA	0.162196	0
DNA	1	chr3	195684235	+	4	CCGAGCCAAGGGAGCCCAGAAGAG	CCGAGCCAAGGGAGCCCAGAAGAG	GC-AGCATAGTGAGCCCAGAANRG	GCAGCATAGTGAGCCCAGAANRG				0	0	0	0	46.23	0	0	0	GTCCCGAGCCAAGGGAGCCCAGAAGAGAC	0.0961072	0
DNA	1	chr3	195965038	-	4	CCGAGCCAAGGGAGCCCAGAAGAG	CCGAGCCAAGGGAGCCCAGAAGAG	GC-AGCATAGTGAGCCCAGAANRG	GCAGCATAGTGAGCCCAGAANRG				0	0	0	0	46.23	0	0	0	TCCCGAGCCAAGGGAGCCCAGAAGAGATC	0.0476978	0
DNA	1	chr3	11387154	-	4	GTGTGGACAGTGAGCCCAGAAAAG	GTGTGGACAGTGAGCCCAGAAAAG	GC-AGCATAGTGAGCCCAGAANRG	GCAGCATAGTGAGCCCAGAANRG				0	0	0	0	46.77	0	0	0	GTGTGTGGACAGTGAGCCCAGAAAAGGCT	0.0305576	0
DNA	1	chr3	10251250	+	4	GATGGAGTAGTGAGCCCAGAATGG	GATGGAGTAGTGAGCCCAGAATGG	GC-AGCATAGTGAGCCCAGAANRG	GCAGCATAGTGAGCCCAGAANRG				0	0	0	0	46.81	0	0	0	TATGATGGAGTAGTGAGCCCAGAATGGAG	0.109406	0
DNA	1	chr3	9243945	-	4	GGCAGGAATGTGAGCCCAGAAAGG	GGCAGGAATGTGAGCCCAGAAAGG	GC-AGCATAGTGAGCCCAGAANRG	GCAGCATAGTGAGCCCAGAANRG				0	0	0	0	46.59	0	0	0	TAGGCAGGAATGTGAGCCCAGAAAGGTCA	0.484284	0
DNA	1	chr3	6298369	-	4	AACAGAATAGAGAGCCCAGAATAG	AACAGAATAGAGAGCCCAGAATAG	GC-AGCATAGTGAGCCCAGAANRG	GCAGCATAGTGAGCCCAGAANRG				0	0	0	0	46.39	0	0	0	GGAACAGAATAGAGAGCCCAGAATAGTCA	0.336099	0
DNA	1	chr3	5205602	-	4	GCAACCAAAGTGAGCCTGGAAGGG	GCAACCAAAGTGAGCCTGGAAGGG	GC-AGCATAGTGAGCCCAGAANRG	GCAGCATAGTGAGCCCAGAANRG				0	0	0	0	40.09	0	0	0	CAGCAACCAAAGTGAGCCTGGAAGGGGAT	0.0512546	0
RNA	1	chr3	194136467	+	3	ACAGCAT-CTGAGCACAGAAAGG	ACAGCATCTGAGCACAGAAAGG	GCAGCATAGTGAGCCCAGAANRG	GCAGCATAGTGAGCCCAGAANRG				0	0	0	0	45.25	0	0	0	AAGACAGCATCTGAGCACAGAAAGGTAAG	0.131092	0
RNA	1	chr3	139494095	+	3	GCTGCAT-GTGGCCCCAGAAGAG	GCTGCATGTGGCCCCAGAAGAG	GCAGCATAGTGAGCCCAGAANRG	GCAGCATAGTGAGCCCAGAANRG				0	0	0	0	45.57	0	0	0	CAAGCTGCATGTGGCCCCAGAAGAGTACC	0.140971	0
RNA	1	chr3	123210031	+	3	GCAGAAA-GTGAGGCCAGAAAGG	GCAGAAAGTGAGGCCAGAAAGG	GCAGCATAGTGAGCCCAGAANRG	GCAGCATAGTGAGCCCAGAANRG				0	0	0	0	45.9	0	0	0	GTTGCAGAAAGTGAGGCCAGAAAGGTAGG	0.15569	0
RNA	1	chr3	111762663	-	3	GCAGTAT-GTGAGCCAAAAAAGG	GCAGTATGTGAGCCAAAAAAGG	GCAGCATAGTGAGCCCAGAANRG	GCAGCATAGTGAGCCCAGAANRG				0	0	0	0	41.13	0	0	0	TACAGCAGTATGTGAGCCAAAAAAGGCCA	0.123046	0
RNA	1	chr3	44058682	-	3	GCACCAG-GTGAGCCCAGCAGGG	GCACCAGGTGAGCCCAGCAGGG	GCAGCATAGTGAGCCCAGAANRG	GCAGCATAGTGAGCCCAGAANRG				0	0	0	0	42.22	0	0	0	TCAGGCACCAGGTGAGCCCAGCAGGGCGT	0.134167	0
RNA	1	chr3	24462182	+	3	GCAGCAT-GTTATCCCAAAAAGG	GCAGCATGTTATCCCAAAAAGG	GCAGCATAGTGAGCCCAGAANRG	GCAGCATAGTGAGCCCAGAANRG				0	0	0	0	41.82	0	0	0	TCAGCAGCATGTTATCCCAAAAAGGGCCC	0.158553	0
RNA	1	chr3	18336490	-	3	AGATCAT-GTGAGCCCAGAAAGG	AGATCATGTGAGCCCAGAAAGG	GCAGCATAGTGAGCCCAGAANRG	GCAGCATAGTGAGCCCAGAANRG				0	0	0	0	47.2	0	0	0	GGGAAGATCATGTGAGCCCAGAAAGGCAA	0.113598	0
RNA	1	chr3	13661220	-	3	GCAGCCT-GCGAGCCCAGAGAGG	GCAGCCTGCGAGCCCAGAGAGG	GCAGCATAGTGAGCCCAGAANRG	GCAGCATAGTGAGCCCAGAANRG				0	0	0	0	40.91	0	0	0	GGGAGCAGCCTGCGAGCCCAGAGAGGCTG	0.148428	0
RNA	1	chr3	13188322	+	3	ACAGCAT-GTGATCCCAGACCAG	ACAGCATGTGATCCCAGACCAG	GCAGCATAGTGAGCCCAGAANRG	GCAGCATAGTGAGCCCAGAANRG				0	0	0	0	40.4	0	0	0	AAGACAGCATGTGATCCCAGACCAGCTAT	0.149993	0
RNA	1	chr3	139233982	-	3	GCAGCATATTGTC-CCAGAAAAG	GCAGCATATTGTCCCAGAAAAG	GCAGCATAGTGAGCCCAGAANRG	GCAGCATAGTGAGCCCAGAANRG				0	0	0	0	44.34	0	0	0	GGCAGCAGCATATTGTCCCAGAAAAGCCA	0.234804	0
RNA	1	chr3	96820852	+	3	GCAACATAGTAAGCC-AGCAGAG	GCAACATAGTAAGCCAGCAGAG	GCAGCATAGTGAGCCCAGAANRG	GCAGCATAGTGAGCCCAGAANRG				0	0	0	0	39.72	0	0	0	ATGGCAACATAGTAAGCCAGCAGAGTCTA	0.149071	0
RNA	1	chr3	96820852	+	3	GCAACATAGTAAGC-CAGCAGAG	GCAACATAGTAAGCCAGCAGAG	GCAGCATAGTGAGCCCAGAANRG	GCAGCATAGTGAGCCCAGAANRG				0	0	0	0	40.12	0	0	0	ATGGCAACATAGTAAGCCAGCAGAGTCTA	0.149071	0
RNA	1	chr3	96820852	+	3	GCAACATAGTAAG-CCAGCAGAG	GCAACATAGTAAGCCAGCAGAG	GCAGCATAGTGAGCCCAGAANRG	GCAGCATAGTGAGCCCAGAANRG				0	0	0	0	40.72	0	0	0	ATGGCAACATAGTAAGCCAGCAGAGTCTA	0.149071	0
RNA	1	chr3	55574603	-	3	GCAGAATACTGAGCC-AGCAGAG	GCAGAATACTGAGCCAGCAGAG	GCAGCATAGTGAGCCCAGAANRG	GCAGCATAGTGAGCCCAGAANRG				0	0	0	0	40.05	0	0	0	ACATGCAGAATACTGAGCCAGCAGAGCCT	0.0483831	0
RNA	1	chr3	55574603	-	3	GCAGAATACTGAGC-CAGCAGAG	GCAGAATACTGAGCCAGCAGAG	GCAGCATAGTGAGCCCAGAANRG	GCAGCATAGTGAGCCCAGAANRG				0	0	0	0	40.45	0	0	0	ACATGCAGAATACTGAGCCAGCAGAGCCT	0.0483831	0
RNA	1	chr3	55574603	-	3	GCAGAATACTGAG-CCAGCAGAG	GCAGAATACTGAGCCAGCAGAG	GCAGCATAGTGAGCCCAGAANRG	GCAGCATAGTGAGCCCAGAANRG				0	0	0	0	41.05	0	0	0	ACATGCAGAATACTGAGCCAGCAGAGCCT	0.0483831	0
RNA	1	chr3	46373152	-	3	GCAGCATAGTGAGCC-CAGAAGG	GCAGCATAGTGAGCCCAGAAGG	GCAGCATAGTGAGCCCAGAANRG	GCAGCATAGTGAGCCCAGAANRG				0	0	0	0	33.59	0	0	0	GGCGGCAGCATAGTGAGCCCAGAAGGGGA	0.514849	0
RNA	1	chr3	46373152	-	3	GCAGCATAGTGAGC-CCAGAAGG	GCAGCATAGTGAGCCCAGAAGG	GCAGCATAGTGAGCCCAGAANRG	GCAGCATAGTGAGCCCAGAANRG				0	0	0	0	33.99	0	0	0	GGCGGCAGCATAGTGAGCCCAGAAGGGGA	0.514849	0
RNA	1	chr3	46373152	-	3	GCAGCATAGTGAG-CCCAGAAGG	GCAGCATAGTGAGCCCAGAAGG	GCAGCATAGTGAGCCCAGAANRG	GCAGCATAGTGAGCCCAGAANRG				0	0	0	0	34.59	0	0	0	GGCGGCAGCATAGTGAGCCCAGAAGGGGA	0.514849	0
RNA	1	chr3	139233982	-	3	GCAGCATATTGTCC-CAGAAAAG	GCAGCATATTGTCCCAGAAAAG	GCAGCATAGTGAGCCCAGAANRG	GCAGCATAGTGAGCCCAGAANRG				0	0	0	0	43.74	0	0	0	GGCAGCAGCATATTGTCCCAGAAAAGCCA	0.234804	0
RNA	1	chr3	34003579	-	3	GCAGCATAATTAGCC-AGAGGAG	GCAGCATAATTAGCCAGAGGAG	GCAGCATAGTGAGCCCAGAANRG	GCAGCATAGTGAGCCCAGAANRG				0	0	0	0	38.54	0	0	0	ATTGGCAGCATAATTAGCCAGAGGAGCCC	0.0747251	0
RNA	1	chr3	34003579	-	3	GCAGCATAATTAG-CCAGAGGAG	GCAGCATAATTAGCCAGAGGAG	GCAGCATAGTGAGCCCAGAANRG	GCAGCATAGTGAGCCCAGAANRG				0	0	0	0	39.54	0	0	0	ATTGGCAGCATAATTAGCCAGAGGAGCCC	0.0747251	0
RNA	1	chr3	34003579	-	3	GCAGCATAATTAGC-CAGAGGAG	GCAGCATAATTAGCCAGAGGAG	GCAGCATAGTGAGCCCAGAANRG	GCAGCATAGTGAGCCCAGAANRG				0	0	0	0	38.94	0	0	0	ATTGGCAGCATAATTAGCCAGAGGAGCCC	0.0747251	0
RNA	1	chr3	139233982	-	3	GCAGCATATTGTCCC-AGAAAAG	GCAGCATATTGTCCCAGAAAAG	GCAGCATAGTGAGCCCAGAANRG	GCAGCATAGTGAGCCCAGAANRG				0	0	0	0	43.34	0	0	0	GGCAGCAGCATATTGTCCCAGAAAAGCCA	0.234804	0
RNA	1	chr3	164226349	+	3	GCAGCCTCCTGAG-CCAGAATAG	GCAGCCTCCTGAGCCAGAATAG	GCAGCATAGTGAGCCCAGAANRG	GCAGCATAGTGAGCCCAGAANRG				0	0	0	0	45.76	0	0	0	CGGGCAGCCTCCTGAGCCAGAATAGGCTC	0.154846	0
RNA	1	chr3	164226349	+	3	GCAGCCTCCTGAGC-CAGAATAG	GCAGCCTCCTGAGCCAGAATAG	GCAGCATAGTGAGCCCAGAANRG	GCAGCATAGTGAGCCCAGAANRG				0	0	0	0	45.16	0	0	0	CGGGCAGCCTCCTGAGCCAGAATAGGCTC	0.154846	0
RNA	1	chr3	184167544	-	3	GCAGAATGGTGAGGC-AGAAAGG	GCAGAATGGTGAGGCAGAAAGG	GCAGCATAGTGAGCCCAGAANRG	GCAGCATAGTGAGCCCAGAANRG				0	0	0	0	43.83	0	0	0	GGAGGCAGAATGGTGAGGCAGAAAGGGGC	0.109743	0
RNA	1	chr3	184167544	-	3	GCAGAATGGTGAGG-CAGAAAGG	GCAGAATGGTGAGGCAGAAAGG	GCAGCATAGTGAGCCCAGAANRG	GCAGCATAGTGAGCCCAGAANRG				0	0	0	0	44.23	0	0	0	GGAGGCAGAATGGTGAGGCAGAAAGGGGC	0.109743	0
RNA	1	chr3	184167544	-	3	GCAGAATGGTGAG-GCAGAAAGG	GCAGAATGGTGAGGCAGAAAGG	GCAGCATAGTGAGCCCAGAANRG	GCAGCATAGTGAGCCCAGAANRG				0	0	0	0	44.23	0	0	0	GGAGGCAGAATGGTGAGGCAGAAAGGGGC	0.109743	0
RNA	1	chr3	169768119	+	3	GCAGCAAAGAGAGCC-AGCACAG	GCAGCAAAGAGAGCCAGCACAG	GCAGCATAGTGAGCCCAGAANRG	GCAGCATAGTGAGCCCAGAANRG				0	0	0	0	39.86	0	0	0	CCAGCAGCAAAGAGAGCCAGCACAGCCTG	0.105734	0
RNA	1	chr3	169768119	+	3	GCAGCAAAGAGAGC-CAGCACAG	GCAGCAAAGAGAGCCAGCACAG	GCAGCATAGTGAGCCCAGAANRG	GCAGCATAGTGAGCCCAGAANRG				0	0	0	0	40.26	0	0	0	CCAGCAGCAAAGAGAGCCAGCACAGCCTG	0.105734	0
RNA	1	chr3	169768119	+	3	GCAGCAAAGAGAG-CCAGCACAG	GCAGCAAAGAGAGCCAGCACAG	GCAGCATAGTGAGCCCAGAANRG	GCAGCATAGTGAGCCCAGAANRG				0	0	0	0	40.86	0	0	0	CCAGCAGCAAAGAGAGCCAGCACAGCCTG	0.105734	0
RNA	1	chr3	164226349	+	3	GCAGCCTCCTGAGCC-AGAATAG	GCAGCCTCCTGAGCCAGAATAG	GCAGCATAGTGAGCCCAGAANRG	GCAGCATAGTGAGCCCAGAANRG				0	0	0	0	44.76	0	0	0	CGGGCAGCCTCCTGAGCCAGAATAGGCTC	0.154846	0
RNA	1	chr3	184130024	+	3	GCAACA-AGTGAGCCCAGCTGAG	GCAACAAGTGAGCCCAGCTGAG	GCAGCATAGTGAGCCCAGAANRG	GCAGCATAGTGAGCCCAGAANRG				0	0	0	0	36.49	0	0	0	TAAGCAACAAGTGAGCCCAGCTGAGAAGC	0.160436	0
RNA	1	chr3	146602945	-	3	GCAGCT-AGTGATCTCAGAATAG	GCAGCTAGTGATCTCAGAATAG	GCAGCATAGTGAGCCCAGAANRG	GCAGCATAGTGAGCCCAGAANRG				0	0	0	0	44.45	0	0	0	AGAAGCAGCTAGTGATCTCAGAATAGTGA	0.221078	0
RNA	1	chr3	143948501	-	3	GCAGAA-AGTGAGGGCAGAAGAG	GCAGAAAGTGAGGGCAGAAGAG	GCAGCATAGTGAGCCCAGAANRG	GCAGCATAGTGAGCCCAGAANRG				0	0	0	0	44.27	0	0	0	TTCTGCAGAAAGTGAGGGCAGAAGAGCCA	0.0747815	0
RNA	1	chr3	141019533	-	3	GCAGCA-AGGGAGTCCAGGAAAG	GCAGCAAGGGAGTCCAGGAAAG	GCAGCATAGTGAGCCCAGAANRG	GCAGCATAGTGAGCCCAGAANRG				0	0	0	0	40.86	0	0	0	CAAGGCAGCAAGGGAGTCCAGGAAAGTCC	0.0802617	0
RNA	1	chr3	123210031	+	2	GCAGAA-AGTGAGGCCAGAAAGG	GCAGAAAGTGAGGCCAGAAAGG	GCAGCATAGTGAGCCCAGAANRG	GCAGCATAGTGAGCCCAGAANRG				0	0	0	0	46.17	0	0	0	GTTGCAGAAAGTGAGGCCAGAAAGGTAGG	0.15569	0
RNA	1	chr3	46354398	+	3	GCAGCA-AGCGAGGCCAGGACAG	GCAGCAAGCGAGGCCAGGACAG	GCAGCATAGTGAGCCCAGAANRG	GCAGCATAGTGAGCCCAGAANRG				0	0	0	0	40.86	0	0	0	TGGGCAGCAAGCGAGGCCAGGACAGCCAC	0.154094	0
RNA	1	chr3	42660271	+	3	GCAGCA-AGTGAGCACACGATGG	GCAGCAAGTGAGCACACGATGG	GCAGCATAGTGAGCCCAGAANRG	GCAGCATAGTGAGCCCAGAANRG				0	0	0	0	36.76	0	0	0	ACTGCAGCAAGTGAGCACACGATGGGAGG	0.15302	0
RNA	1	chr3	33906159	+	3	GAAGCA-AGTGATCCAAGAAGGG	GAAGCAAGTGATCCAAGAAGGG	GCAGCATAGTGAGCCCAGAANRG	GCAGCATAGTGAGCCCAGAANRG				0	0	0	0	44.13	0	0	0	CAGGAAGCAAGTGATCCAAGAAGGGGGTG	0.122946	0
RNA	1	chr3	27279750	-	3	GAAGCT-AGTGAGCTCAGAATGG	GAAGCTAGTGAGCTCAGAATGG	GCAGCATAGTGAGCCCAGAANRG	GCAGCATAGTGAGCCCAGAANRG				0	0	0	0	45.42	0	0	0	CACAGAAGCTAGTGAGCTCAGAATGGGAT	0.264982	0
RNA	1	chr3	10579300	+	3	GCTGCA-AATGTGCCCAGAACAG	GCTGCAAATGTGCCCAGAACAG	GCAGCATAGTGAGCCCAGAANRG	GCAGCATAGTGAGCCCAGAANRG				0	0	0	0	46.36	0	0	0	GATGCTGCAAATGTGCCCAGAACAGGGCT	0.144987	0
RNA	1	chr3	44058682	-	3	GCACCA-GGTGAGCCCAGCAGGG	GCACCAGGTGAGCCCAGCAGGG	GCAGCATAGTGAGCCCAGAANRG	GCAGCATAGTGAGCCCAGAANRG				0	0	0	0	42.22	0	0	0	TCAGGCACCAGGTGAGCCCAGCAGGGCGT	0.134167	0
DNA	1	chr3	197548197	+	3	GCAGCAGAATGGAGCCCAGACTGG	GCAGCAGAATGGAGCCCAGACTGG	GCAGCATAGTG-AGCCCAGAANRG	GCAGCATAGTGAGCCCAGAANRG				0	0	0	0	46.32	0	0	0	AGAGCAGCAGAATGGAGCCCAGACTGGCT	0.155038	0
DNA	1	chr3	63372767	+	2	GCTGCAAAGTGCAGCCCAGAAGAG	GCTGCAAAGTGCAGCCCAGAAGAG	GCAGCATAGTG-AGCCCAGAANRG	GCAGCATAGTGAGCCCAGAANRG				0	0	0	0	46.52	0	0	0	AGGGCTGCAAAGTGCAGCCCAGAAGAGTC	0.132347	0
DNA	1	chr3	13122694	-	3	GCAGCAAAGTGAAGCCAATAACAG	GCAGCAAAGTGAAGCCAATAACAG	GCAGCATAGTG-AGCCCAGAANRG	GCAGCATAGTGAGCCCAGAANRG				0	0	0	0	38.67	0	0	0	TGGCAGCAAAGTGAAGCCAATAACAGAGA	0.0952239	0
RNA	1	chr3	134475576	-	3	GCAGCAGAGTGAGGCC-AAATGG	GCAGCAGAGTGAGGCCAAATGG	GCAGCATAGTGAGCCCAGAANRG	GCAGCATAGTGAGCCCAGAANRG				0	0	0	0	39.36	0	0	0	CAGTGCAGCAGAGTGAGGCCAAATGGACT	0.228291	0
RNA	1	chr3	46373152	-	2	GCAGCATAGTGAGCCC-AGAAGG	GCAGCATAGTGAGCCCAGAAGG	GCAGCATAGTGAGCCCAGAANRG	GCAGCATAGTGAGCCCAGAANRG				0	0	0	0	35.89	0	0	0	GGCGGCAGCATAGTGAGCCCAGAAGGGGA	0.514849	0
DNA	1	chr3	195143339	-	3	GCACCAGACTGAGCCCAAGAATGG	GCACCAGACTGAGCCCAAGAATGG	GCAGCATAGTGAGCCC-AGAANRG	GCAGCATAGTGAGCCCAGAANRG				0	0	0	0	43.95	0	0	0	GTGCACCAGACTGAGCCCAAGAATGGCCA	0.159635	0
DNA	1	chr3	107867424	+	3	GCTGTATAGTGAGTCCAAGAAAAG	GCTGTATAGTGAGTCCAAGAAAAG	GCAGCATAGTGAGCCC-AGAANRG	GCAGCATAGTGAGCCCAGAANRG				0	0	0	0	43.06	0	0	0	TCAGCTGTATAGTGAGTCCAAGAAAAGTC	0.0599935	0
DNA	1	chr3	46373150	-	3	GCAGCATAGTGAGCCCAGAAGGGG	GCAGCATAGTGAGCCCAGAAGGGG	GCAGCATAGTGAGCCC-AGAANRG	GCAGCATAGTGAGCCCAGAANRG				0	0	0	0	35.7	0	0	0	CGGCAGCATAGTGAGCCCAGAAGGGGACA	0.710145	0
DNA	1	chr3	194989416	-	3	GCTGCATAAGTGACCCCAGATGAG	GCTGCATAAGTGACCCCAGATGAG	GCAGCATA-GTGAGCCCAGAANRG	GCAGCATAGTGAGCCCAGAANRG				0	0	0	0	45.9	0	0	0	GAGCTGCATAAGTGACCCCAGATGAGACT	0.116073	0
DNA	1	chr3	147405193	+	3	GCAGCATCCGGGTGCCCAGAATAG	GCAGCATCCGGGTGCCCAGAATAG	GCAGCATA-GTGAGCCCAGAANRG	GCAGCATAGTGAGCCCAGAANRG				0	0	0	0	45.28	0	0	0	TGGGCAGCATCCGGGTGCCCAGAATAGAG	0.127437	0
DNA	1	chr3	50529502	+	3	GCAGCAGATGTGGGCCCAGAGCAG	GCAGCAGATGTGGGCCCAGAGCAG	GCAGCATA-GTGAGCCCAGAANRG	GCAGCATAGTGAGCCCAGAANRG				0	0	0	0	46.02	0	0	0	CTAGCAGCAGATGTGGGCCCAGAGCAGAA	0.140346	0
DNA	1	chr3	33093011	+	3	CCAGCATGTGTGTGCCCAGAAAGG	CCAGCATGTGTGTGCCCAGAAAGG	GCAGCATA-GTGAGCCCAGAANRG	GCAGCATAGTGAGCCCAGAANRG				0	0	0	0	45.86	0	0	0	TGCCCAGCATGTGTGTGCCCAGAAAGGAT	0.0775389	0
RNA	1	chr3	139233982	-	2	GCAGCATATTG-TCCCAGAAAAG	GCAGCATATTGTCCCAGAAAAG	GCAGCATAGTGAGCCCAGAANRG	GCAGCATAGTGAGCCCAGAANRG				0	0	0	0	45.64	0	0	0	GGCAGCAGCATATTGTCCCAGAAAAGCCA	0.234804	0
RNA	1	chr3	60322154	-	3	GCATCATAATT-GCCCAGAAAAG	GCATCATAATTGCCCAGAAAAG	GCAGCATAGTGAGCCCAGAANRG	GCAGCATAGTGAGCCCAGAANRG				0	0	0	0	45.87	0	0	0	GCAGGCATCATAATTGCCCAGAAAAGCAT	0.0706147	0
RNA	1	chr3	38643332	-	3	GCAGGAAAGTG-GCCCAGACAAG	GCAGGAAAGTGGCCCAGACAAG	GCAGCATAGTGAGCCCAGAANRG	GCAGCATAGTGAGCCCAGAANRG				0	0	0	0	40.67	0	0	0	AAGCGCAGGAAAGTGGCCCAGACAAGCCC	0.0626321	0
DNA	1	chr3	68703360	-	4	GCAGCCTAGTGAGACCCTGAGCAG	GCAGCCTAGTGAGACCCTGAGCAG	GCAGCATAGTGAGC-CCAGAANRG	GCAGCATAGTGAGCCCAGAANRG				0	0	0	0	40.29	0	0	0	TTGCAGCCTAGTGAGACCCTGAGCAGAGG	0.117376	0
DNA	1	chr3	64858119	-	4	GAAACATTGTGAGCACCAGCATGG	GAAACATTGTGAGCACCAGCATGG	GCAGCATAGTGAGC-CCAGAANRG	GCAGCATAGTGAGCCCAGAANRG				0	0	0	0	39.23	0	0	0	CTGAAACATTGTGAGCACCAGCATGGTGC	0.0479599	0
DNA	1	chr3	56876411	+	4	TCATGTTAGTGAGCTCCAGAAGAG	TCATGTTAGTGAGCTCCAGAAGAG	GCAGCATAGTGAGC-CCAGAANRG	GCAGCATAGTGAGCCCAGAANRG				0	0	0	0	45.11	0	0	0	CAGTCATGTTAGTGAGCTCCAGAAGAGCC	0.0911337	0
DNA	1	chr3	54516982	+	4	GCAGGAGTGGGAGCCCCAGAAAAG	GCAGGAGTGGGAGCCCCAGAAAAG	GCAGCATAGTGAGC-CCAGAANRG	GCAGCATAGTGAGCCCAGAANRG				0	0	0	0	44.61	0	0	0	CCTGCAGGAGTGGGAGCCCCAGAAAAGGC	0.0881252	0
DNA	1	chr3	49276630	+	4	GCAGCAAAAGGAGCAGCAGAAGAG	GCAGCAAAAGGAGCAGCAGAAGAG	GCAGCATAGTGAGC-CCAGAANRG	GCAGCATAGTGAGCCCAGAANRG				0	0	0	0	42.42	0	0	0	ACAGCAGCAAAAGGAGCAGCAGAAGAGCA	0.102632	0
DNA	1	chr3	46373150	-	4	GCAGCATAGTGAGCCCAGAAGGGG	GCAGCATAGTGAGCCCAGAAGGGG	GCAGCATAGTGAGC-CCAGAANRG	GCAGCATAGTGAGCCCAGAANRG				0	0	0	0	33.8	0	0	0	CGGCAGCATAGTGAGCCCAGAAGGGGACA	0.710145	0
DNA	1	chr3	45491873	-	4	GGAGCAGAGTTAGCACCAGGAGGG	GGAGCAGAGTTAGCACCAGGAGGG	GCAGCATAGTGAGC-CCAGAANRG	GCAGCATAGTGAGCCCAGAANRG				0	0	0	0	38.74	0	0	0	AGGGAGCAGAGTTAGCACCAGGAGGGAGG	0.072316	0
DNA	1	chr3	32987565	-	4	GCACCATAGTGAGAGACAGTACAG	GCACCATAGTGAGAGACAGTACAG	GCAGCATAGTGAGC-CCAGAANRG	GCAGCATAGTGAGCCCAGAANRG				0	0	0	0	36.03	0	0	0	GGGCACCATAGTGAGAGACAGTACAGAGT	0.0626986	0
DNA	1	chr3	13798810	-	4	GCGGCTTAATCAGCACCAGAAAAG	GCGGCTTAATCAGCACCAGAAAAG	GCAGCATAGTGAGC-CCAGAANRG	GCAGCATAGTGAGCCCAGAANRG				0	0	0	0	44.39	0	0	0	TGGCGGCTTAATCAGCACCAGAAAAGATG	0.0378515	0
DNA	1	chr3	13750259	-	3	ACAGCATATTGAGCTCCAAAATGG	ACAGCATATTGAGCTCCAAAATGG	GCAGCATAGTGAGC-CCAGAANRG	GCAGCATAGTGAGCCCAGAANRG				0	0	0	0	40.33	0	0	0	CCACAGCATATTGAGCTCCAAAATGGGAT	0.230521	0
DNA	1	chr3	13321311	-	4	GCAGCAGTGAGAACCCCAGAAAAG	GCAGCAGTGAGAACCCCAGAAAAG	GCAGCATAGTGAGC-CCAGAANRG	GCAGCATAGTGAGCCCAGAANRG				0	0	0	0	43.7	0	0	0	GGGCAGCAGTGAGAACCCCAGAAAAGGTG	0.0335637	0
DNA	1	chr3	1132718	-	4	GCAGTAAAGTGACCCCCAGCAAGG	GCAGTAAAGTGACCCCCAGCAAGG	GCAGCATAGTGAGC-CCAGAANRG	GCAGCATAGTGAGCCCAGAANRG				0	0	0	0	38.28	0	0	0	GTGCAGTAAAGTGACCCCCAGCAAGGATG	0.0639647	0
DNA	1	chr3	2722871	-	4	GCAGCATATTGATGTACAGAAGGG	GCAGCATATTGATGTACAGAAGGG	GCAGCATAGTGAGC-CCAGAANRG	GCAGCATAGTGAGCCCAGAANRG				0	0	0	0	40.75	0	0	0	TAGCAGCATATTGATGTACAGAAGGGATA	0.200936	0
DNA	1	chr3	88180958	-	4	GCACTATAGTGAGACTCAGAAGGG	GCACTATAGTGAGACTCAGAAGGG	GCAGCATAGTGAGC-CCAGAANRG	GCAGCATAGTGAGCCCAGAANRG				0	0	0	0	41.84	0	0	0	ATGCACTATAGTGAGACTCAGAAGGGATG	0.243649	0
DNA	1	chr3	102455559	-	4	TCAGCATTTTGGGCCCCAGAAAGG	TCAGCATTTTGGGCCCCAGAAAGG	GCAGCATAGTGAGC-CCAGAANRG	GCAGCATAGTGAGCCCAGAANRG				0	0	0	0	44.26	0	0	0	GATCAGCATTTTGGGCCCCAGAAAGGATT	0.0820393	0
DNA	1	chr3	107867424	+	4	GCTGTATAGTGAGTCCAAGAAAAG	GCTGTATAGTGAGTCCAAGAAAAG	GCAGCATAGTGAGC-CCAGAANRG	GCAGCATAGTGAGCCCAGAANRG				0	0	0	0	41.16	0	0	0	TCAGCTGTATAGTGAGTCCAAGAAAAGTC	0.0599935	0
DNA	1	chr3	127002726	+	4	GCAGCATCGTGAGCTGCGGAGAAG	GCAGCATCGTGAGCTGCGGAGAAG	GCAGCATAGTGAGC-CCAGAANRG	GCAGCATAGTGAGCCCAGAANRG				0	0	0	0	39.23	0	0	0	CTTGCAGCATCGTGAGCTGCGGAGAAGAG	0.0213518	0
DNA	1	chr3	195143339	-	4	GCACCAGACTGAGCCCAAGAATGG	GCACCAGACTGAGCCCAAGAATGG	GCAGCATAGTGAGC-CCAGAANRG	GCAGCATAGTGAGCCCAGAANRG				0	0	0	0	42.05	0	0	0	GTGCACCAGACTGAGCCCAAGAATGGCCA	0.159635	0
DNA	1	chr3	169822951	-	4	AGAGCATAGTGACAGCCAGAAAAG	AGAGCATAGTGACAGCCAGAAAAG	GCAGCATAGTGAGC-CCAGAANRG	GCAGCATAGTGAGCCCAGAANRG				0	0	0	0	43.15	0	0	0	TGAGAGCATAGTGACAGCCAGAAAAGGAA	0.0842252	0
DNA	1	chr3	158235138	-	4	GCATCATAGTGACACTCAGAATGG	GCATCATAGTGACACTCAGAATGG	GCAGCATAGTGAGC-CCAGAANRG	GCAGCATAGTGAGCCCAGAANRG				0	0	0	0	40.93	0	0	0	ATGCATCATAGTGACACTCAGAATGGAAA	0.240934	0
DNA	1	chr3	157126922	+	4	GCAGCAGAGTGAGTGGCAGAGCAG	GCAGCAGAGTGAGTGGCAGAGCAG	GCAGCATAGTGAGC-CCAGAANRG	GCAGCATAGTGAGCCCAGAANRG				0	0	0	0	41.97	0	0	0	GAGGCAGCAGAGTGAGTGGCAGAGCAGTG	0.100658	0
DNA	1	chr3	143340593	-	4	GTACCAAAGTGAGCCCCAGGAAAG	GTACCAAAGTGAGCCCCAGGAAAG	GCAGCATAGTGAGC-CCAGAANRG	GCAGCATAGTGAGCCCAGAANRG				0	0	0	0	39.27	0	0	0	CGGTACCAAAGTGAGCCCCAGGAAAGATC	0.0410062	0
DNA	1	chr3	129036520	-	4	CCAGCATGGAGAGCCCCAGGAGAG	CCAGCATGGAGAGCCCCAGGAGAG	GCAGCATAGTGAGC-CCAGAANRG	GCAGCATAGTGAGCCCAGAANRG				0	0	0	0	38.91	0	0	0	CCCCAGCATGGAGAGCCCCAGGAGAGGGG	0.0676287	0
RNA	1	chr3	41178170	+	3	TCAG-AGAGTGAGCCTAGAACAG	TCAGAGAGTGAGCCTAGAACAG	GCAGCATAGTGAGCCCAGAANRG	GCAGCATAGTGAGCCCAGAANRG				0	0	0	0	45.05	0	0	0	GAGTCAGAGAGTGAGCCTAGAACAGCACT	0.13993	0
RNA	1	chr3	39266235	+	3	TCAA-ATAGTGAGTCCAGAAGGG	TCAAATAGTGAGTCCAGAAGGG	GCAGCATAGTGAGCCCAGAANRG	GCAGCATAGTGAGCCCAGAANRG				0	0	0	0	46.11	0	0	0	TTATCAAATAGTGAGTCCAGAAGGGCAAA	0.126646	0
RNA	1	chr3	27279750	-	3	GAAG-CTAGTGAGCTCAGAATGG	GAAGCTAGTGAGCTCAGAATGG	GCAGCATAGTGAGCCCAGAANRG	GCAGCATAGTGAGCCCAGAANRG				0	0	0	0	45.46	0	0	0	CACAGAAGCTAGTGAGCTCAGAATGGGAT	0.264982	0
RNA	1	chr3	11387154	-	3	GTGG-ACAGTGAGCCCAGAAAAG	GTGGACAGTGAGCCCAGAAAAG	GCAGCATAGTGAGCCCAGAANRG	GCAGCATAGTGAGCCCAGAANRG				0	0	0	0	47.19	0	0	0	GTGTGTGGACAGTGAGCCCAGAAAAGGCT	0.0305576	0
RNA	1	chr3	48236121	+	3	GCAG-ATAGTGAGGGCAAAAGAG	GCAGATAGTGAGGGCAAAAGAG	GCAGCATAGTGAGCCCAGAANRG	GCAGCATAGTGAGCCCAGAANRG				0	0	0	0	40.5	0	0	0	TAGGCAGATAGTGAGGGCAAAAGAGTCCT	0.137377	0
RNA	1	chr3	66597021	+	3	GCAG-ATAGTGAGGGCAAAAGAG	GCAGATAGTGAGGGCAAAAGAG	GCAGCATAGTGAGCCCAGAANRG	GCAGCATAGTGAGCCCAGAANRG				0	0	0	0	40.5	0	0	0	TAGGCAGATAGTGAGGGCAAAAGAGCCCT	0.16082	0
RNA	1	chr3	125141328	-	3	GCAG-ATGGTGGGCCCTGAAGAG	GCAGATGGTGGGCCCTGAAGAG	GCAGCATAGTGAGCCCAGAANRG	GCAGCATAGTGAGCCCAGAANRG				0	0	0	0	43.63	0	0	0	GGGAGCAGATGGTGGGCCCTGAAGAGCCA	0.0554074	0
RNA	1	chr3	123210031	+	2	GCAG-AAAGTGAGGCCAGAAAGG	GCAGAAAGTGAGGCCAGAAAGG	GCAGCATAGTGAGCCCAGAANRG	GCAGCATAGTGAGCCCAGAANRG				0	0	0	0	46.17	0	0	0	GTTGCAGAAAGTGAGGCCAGAAAGGTAGG	0.15569	0
RNA	1	chr3	178790556	-	3	GCAG-ATAGTGAACCCAGCTAGG	GCAGATAGTGAACCCAGCTAGG	GCAGCATAGTGAGCCCAGAANRG	GCAGCATAGTGAGCCCAGAANRG				0	0	0	0	35.6	0	0	0	GGCAGCAGATAGTGAACCCAGCTAGGCCT	0.137806	0
RNA	1	chr3	163695897	-	3	GCAG-ATATTGAACCCAAAAGAG	GCAGATATTGAACCCAAAAGAG	GCAGCATAGTGAGCCCAGAANRG	GCAGCATAGTGAGCCCAGAANRG				0	0	0	0	42.25	0	0	0	CCGAGCAGATATTGAACCCAAAAGAGCCA	0.090959	0
RNA	1	chr3	155835360	+	3	GCAG-ATAGTGAGGGCAAAAGAG	GCAGATAGTGAGGGCAAAAGAG	GCAGCATAGTGAGCCCAGAANRG	GCAGCATAGTGAGCCCAGAANRG				0	0	0	0	40.5	0	0	0	TAGGCAGATAGTGAGGGCAAAAGAGACCT	0.140698	0
RNA	1	chr3	146602945	-	3	GCAG-CTAGTGATCTCAGAATAG	GCAGCTAGTGATCTCAGAATAG	GCAGCATAGTGAGCCCAGAANRG	GCAGCATAGTGAGCCCAGAANRG				0	0	0	0	44.49	0	0	0	AGAAGCAGCTAGTGATCTCAGAATAGTGA	0.221078	0
RNA	1	chr3	143948501	-	3	GCAG-AAAGTGAGGGCAGAAGAG	GCAGAAAGTGAGGGCAGAAGAG	GCAGCATAGTGAGCCCAGAANRG	GCAGCATAGTGAGCCCAGAANRG				0	0	0	0	44.27	0	0	0	TTCTGCAGAAAGTGAGGGCAGAAGAGCCA	0.0747815	0
RNA	1	chr3	192789317	-	3	GCGGCACAG-GAGCCCAGGAGGG	GCGGCACAGGAGCCCAGGAGGG	GCAGCATAGTGAGCCCAGAANRG	GCAGCATAGTGAGCCCAGAANRG				0	0	0	0	42.01	0	0	0	TCGGGCGGCACAGGAGCCCAGGAGGGTTG	0.149778	0
RNA	1	chr3	182356801	+	3	TCAGCATAG-GAGGCCAGAGAGG	TCAGCATAGGAGGCCAGAGAGG	GCAGCATAGTGAGCCCAGAANRG	GCAGCATAGTGAGCCCAGAANRG				0	0	0	0	39.97	0	0	0	GATTCAGCATAGGAGGCCAGAGAGGAAGG	0.149802	0
RNA	1	chr3	168780395	-	3	GCAGCACAG-GAGCCCAGGGAGG	GCAGCACAGGAGCCCAGGGAGG	GCAGCATAGTGAGCCCAGAANRG	GCAGCATAGTGAGCCCAGAANRG				0	0	0	0	36.16	0	0	0	TCGGGCAGCACAGGAGCCCAGGGAGGGTG	0.178943	0
RNA	1	chr3	47257888	-	3	ACAGCATAG-GAGGACAGAAAAG	ACAGCATAGGAGGACAGAAAAG	GCAGCATAGTGAGCCCAGAANRG	GCAGCATAGTGAGCCCAGAANRG				0	0	0	0	44.07	0	0	0	GCAGACAGCATAGGAGGACAGAAAAGGGT	0.0772812	0
RNA	1	chr3	41796871	+	3	GCACAAAAG-GAGCCCAGAACGG	GCACAAAAGGAGCCCAGAACGG	GCAGCATAGTGAGCCCAGAANRG	GCAGCATAGTGAGCCCAGAANRG				0	0	0	0	46.8	0	0	0	AAAGCACAAAAGGAGCCCAGAACGGTACG	0.143893	0
RNA	1	chr3	40700810	+	3	GCAGCCTAG-GAGGACAGAATGG	GCAGCCTAGGAGGACAGAATGG	GCAGCATAGTGAGCCCAGAANRG	GCAGCATAGTGAGCCCAGAANRG				0	0	0	0	43.98	0	0	0	CCAGCAGCCTAGGAGGACAGAATGGTCTG	0.127557	0
RNA	1	chr3	10216956	-	3	GCAGCACAG-AAGCCCAGCACAG	GCAGCACAGAAGCCCAGCACAG	GCAGCATAGTGAGCCCAGAANRG	GCAGCATAGTGAGCCCAGAANRG				0	0	0	0	41.46	0	0	0	TCTTGCAGCACAGAAGCCCAGCACAGGTA	0.0989252	0
RNA	1	chr3	146602945	-	2	GCAGC-TAGTGATCTCAGAATAG	GCAGCTAGTGATCTCAGAATAG	GCAGCATAGTGAGCCCAGAANRG	GCAGCATAGTGAGCCCAGAANRG				0	0	0	0	44.68	0	0	0	AGAAGCAGCTAGTGATCTCAGAATAGTGA	0.221078	0
RNA	1	chr3	123210031	+	3	GCAGA-AAGTGAGGCCAGAAAGG	GCAGAAAGTGAGGCCAGAAAGG	GCAGCATAGTGAGCCCAGAANRG	GCAGCATAGTGAGCCCAGAANRG				0	0	0	0	45.96	0	0	0	GTTGCAGAAAGTGAGGCCAGAAAGGTAGG	0.15569	0
RNA	1	chr3	37903081	+	3	GCAGC-TAGAGAGCCAAGCACAG	GCAGCTAGAGAGCCAAGCACAG	GCAGCATAGTGAGCCCAGAANRG	GCAGCATAGTGAGCCCAGAANRG				0	0	0	0	39.88	0	0	0	CTGGCAGCTAGAGAGCCAAGCACAGGCCT	0.129931	0
RNA	1	chr3	27279750	-	2	GAAGC-TAGTGAGCTCAGAATGG	GAAGCTAGTGAGCTCAGAATGG	GCAGCATAGTGAGCCCAGAANRG	GCAGCATAGTGAGCCCAGAANRG				0	0	0	0	45.65	0	0	0	CACAGAAGCTAGTGAGCTCAGAATGGGAT	0.264982	0
RNA	1	chr3	17504710	+	3	CCAGC-TAGTTAGCCCAGAGTAG	CCAGCTAGTTAGCCCAGAGTAG	GCAGCATAGTGAGCCCAGAANRG	GCAGCATAGTGAGCCCAGAANRG				0	0	0	0	40.86	0	0	0	ACTCCAGCTAGTTAGCCCAGAGTAGGGTT	0.133185	0
RNA	1	chr3	184284086	-	3	GCAGC-TGGGGAGCACAGAAAAG	GCAGCTGGGGAGCACAGAAAAG	GCAGCATAGTGAGCCCAGAANRG	GCAGCATAGTGAGCCCAGAANRG				0	0	0	0	45.01	0	0	0	CAGTGCAGCTGGGGAGCACAGAAAAGCAA	0.0573778	0
DNA	1	chr3	94172019	-	4	GATGCATGAGTGAGCCCAGCTGAG	GATGCATGAGTGAGCCCAGCTGAG	GCAGCAT-AGTGAGCCCAGAANRG	GCAGCATAGTGAGCCCAGAANRG				0	0	0	0	41.15	0	0	0	CAGATGCATGAGTGAGCCCAGCTGAGATG	0.069549	0
DNA	1	chr3	88110640	-	4	GCAGAATGAATGAGTCCAAAATAG	GCAGAATGAATGAGTCCAAAATAG	GCAGCAT-AGTGAGCCCAGAANRG	GCAGCATAGTGAGCCCAGAANRG				0	0	0	0	39.84	0	0	0	GTGCAGAATGAATGAGTCCAAAATAGTAT	0.0630638	0
DNA	1	chr3	81602932	-	4	GGGGCATGAGTCAGCCAAGAAAAG	GGGGCATGAGTCAGCCAAGAAAAG	GCAGCAT-AGTGAGCCCAGAANRG	GCAGCATAGTGAGCCCAGAANRG				0	0	0	0	43.35	0	0	0	TTGGGGCATGAGTCAGCCAAGAAAAGATG	0.0300766	0
DNA	1	chr3	80743479	+	4	GATGCATTAGTGAGCTCATAAGAG	GATGCATTAGTGAGCTCATAAGAG	GCAGCAT-AGTGAGCCCAGAANRG	GCAGCATAGTGAGCCCAGAANRG				0	0	0	0	39.85	0	0	0	TGAGATGCATTAGTGAGCTCATAAGAGTC	0.0895285	0
DNA	1	chr3	71759461	-	4	GAGGCATGACTGAGCCAAGAAGGG	GAGGCATGACTGAGCCAAGAAGGG	GCAGCAT-AGTGAGCCCAGAANRG	GCAGCATAGTGAGCCCAGAANRG				0	0	0	0	43.65	0	0	0	AGGAGGCATGACTGAGCCAAGAAGGGTTT	0.0539495	0
DNA	1	chr3	64602583	-	4	GAAGCATCAGTAAGGCCAGCATAG	GAAGCATCAGTAAGGCCAGCATAG	GCAGCAT-AGTGAGCCCAGAANRG	GCAGCATAGTGAGCCCAGAANRG				0	0	0	0	38.6	0	0	0	AGGAAGCATCAGTAAGGCCAGCATAGCTG	0.0360077	0
DNA	1	chr3	55578722	-	4	GGAACATGAGTGAGCCCAGCCAAG	GGAACATGAGTGAGCCCAGCCAAG	GCAGCAT-AGTGAGCCCAGAANRG	GCAGCATAGTGAGCCCAGAANRG				0	0	0	0	41.13	0	0	0	GAGGAACATGAGTGAGCCCAGCCAAGACA	0.0303695	0
DNA	1	chr3	53118756	+	3	GCAGCAGCACTGACCCCAGAAGAG	GCAGCAGCACTGACCCCAGAAGAG	GCAGCAT-AGTGAGCCCAGAANRG	GCAGCATAGTGAGCCCAGAANRG				0	0	0	0	45.4	0	0	0	TGGGCAGCAGCACTGACCCCAGAAGAGCC	0.140175	0
DNA	1	chr3	50529502	+	4	GCAGCAGATGTGGGCCCAGAGCAG	GCAGCAGATGTGGGCCCAGAGCAG	GCAGCAT-AGTGAGCCCAGAANRG	GCAGCATAGTGAGCCCAGAANRG				0	0	0	0	45.75	0	0	0	CTAGCAGCAGATGTGGGCCCAGAGCAGAA	0.140346	0
DNA	1	chr3	50130569	-	4	GCAGGAAGACTGAGACCAGAAGGG	GCAGGAAGACTGAGACCAGAAGGG	GCAGCAT-AGTGAGCCCAGAANRG	GCAGCATAGTGAGCCCAGAANRG				0	0	0	0	44.61	0	0	0	AGGCAGGAAGACTGAGACCAGAAGGGGCT	0.0713473	0
DNA	1	chr3	112417342	+	4	GCCTCATAAGTGAGCCATGAAAGG	GCCTCATAAGTGAGCCATGAAAGG	GCAGCAT-AGTGAGCCCAGAANRG	GCAGCATAGTGAGCCCAGAANRG				0	0	0	0	40.11	0	0	0	TCTGCCTCATAAGTGAGCCATGAAAGGGG	0.0703555	0
DNA	1	chr3	41167544	-	4	CCAGCATTAGAGAGCCTAGGAGGG	CCAGCATTAGAGAGCCTAGGAGGG	GCAGCAT-AGTGAGCCCAGAANRG	GCAGCATAGTGAGCCCAGAANRG				0	0	0	0	37.61	0	0	0	TGCCAGCATTAGAGAGCCTAGGAGGGCGA	0.0631564	0
DNA	1	chr3	26596013	+	4	GCAGCTTCAGTGTGCACAGATGAG	GCAGCTTCAGTGTGCACAGATGAG	GCAGCAT-AGTGAGCCCAGAANRG	GCAGCATAGTGAGCCCAGAANRG				0	0	0	0	43.82	0	0	0	GGAGCAGCTTCAGTGTGCACAGATGAGTG	0.101681	0
DNA	1	chr3	16126041	-	4	TGTGCATGAGTGAGCCCAGCAGAG	TGTGCATGAGTGAGCCCAGCAGAG	GCAGCAT-AGTGAGCCCAGAANRG	GCAGCATAGTGAGCCCAGAANRG				0	0	0	0	41.03	0	0	0	GTTGTGCATGAGTGAGCCCAGCAGAGACT	0.035086	0
DNA	1	chr3	10251250	+	4	GATGGAGTAGTGAGCCCAGAATGG	GATGGAGTAGTGAGCCCAGAATGG	GCAGCAT-AGTGAGCCCAGAANRG	GCAGCATAGTGAGCCCAGAANRG				0	0	0	0	46.73	0	0	0	TATGATGGAGTAGTGAGCCCAGAATGGAG	0.109406	0
DNA	1	chr3	8316483	+	4	GAAGCAACAGGGAGGCCAGAAGAG	GAAGCAACAGGGAGGCCAGAAGAG	GCAGCAT-AGTGAGCCCAGAANRG	GCAGCATAGTGAGCCCAGAANRG				0	0	0	0	44.47	0	0	0	AGGGAAGCAACAGGGAGGCCAGAAGAGTT	0.114131	0
DNA	1	chr3	5639561	-	4	GCAGCATCAGAGACCCAGGAACAG	GCAGCATCAGAGACCCAGGAACAG	GCAGCAT-AGTGAGCCCAGAANRG	GCAGCATAGTGAGCCCAGAANRG				0	0	0	0	38.43	0	0	0	AAGCAGCATCAGAGACCCAGGAACAGGTG	0.0324179	0
DNA	1	chr3	682938	+	4	GCAGCAAAATTGGACCCAGAAAAG	GCAGCAAAATTGGACCCAGAAAAG	GCAGCAT-AGTGAGCCCAGAANRG	GCAGCATAGTGAGCCCAGAANRG				0	0	0	0	44.3	0	0	0	TGAGCAGCAAAATTGGACCCAGAAAAGGG	0.0748716	0
DNA	1	chr3	33093011	+	3	CCAGCATGTGTGTGCCCAGAAAGG	CCAGCATGTGTGTGCCCAGAAAGG	GCAGCAT-AGTGAGCCCAGAANRG	GCAGCATAGTGAGCCCAGAANRG				0	0	0	0	45.86	0	0	0	TGCCCAGCATGTGTGTGCCCAGAAAGGAT	0.0775389	0
DNA	1	chr3	113522459	-	4	TCTGCAGCAGTTAGCCCAGAATGG	TCTGCAGCAGTTAGCCCAGAATGG	GCAGCAT-AGTGAGCCCAGAANRG	GCAGCATAGTGAGCCCAGAANRG				0	0	0	0	46.13	0	0	0	CCTCTGCAGCAGTTAGCCCAGAATGGTCA	0.0519324	0
DNA	1	chr3	118491579	+	4	GCCACATGAGTGAGCTCAGAGTGG	GCCACATGAGTGAGCTCAGAGTGG	GCAGCAT-AGTGAGCCCAGAANRG	GCAGCATAGTGAGCCCAGAANRG				0	0	0	0	44.81	0	0	0	GCAGCCACATGAGTGAGCTCAGAGTGGAC	0.130487	0
DNA	1	chr3	123379520	+	4	GAACCTTGAGAGAGCCCAGAACAG	GAACCTTGAGAGAGCCCAGAACAG	GCAGCAT-AGTGAGCCCAGAANRG	GCAGCATAGTGAGCCCAGAANRG				0	0	0	0	46.22	0	0	0	CAAGAACCTTGAGAGAGCCCAGAACAGCA	0.0689421	0
DNA	1	chr3	197548197	+	4	GCAGCAGAATGGAGCCCAGACTGG	GCAGCAGAATGGAGCCCAGACTGG	GCAGCAT-AGTGAGCCCAGAANRG	GCAGCATAGTGAGCCCAGAANRG				0	0	0	0	46	0	0	0	AGAGCAGCAGAATGGAGCCCAGACTGGCT	0.155038	0
DNA	1	chr3	194989416	-	3	GCTGCATAAGTGACCCCAGATGAG	GCTGCATAAGTGACCCCAGATGAG	GCAGCAT-AGTGAGCCCAGAANRG	GCAGCATAGTGAGCCCAGAANRG				0	0	0	0	45.98	0	0	0	GAGCTGCATAAGTGACCCCAGATGAGACT	0.116073	0
DNA	1	chr3	194098246	+	4	TCGGCCTGAGTGAGCCCAGAGGGG	TCGGCCTGAGTGAGCCCAGAGGGG	GCAGCAT-AGTGAGCCCAGAANRG	GCAGCATAGTGAGCCCAGAANRG				0	0	0	0	46.95	0	0	0	CAGTCGGCCTGAGTGAGCCCAGAGGGGCC	0.154248	0
DNA	1	chr3	190631538	-	4	TCAGCATTAGCTGGCCCAGAATAG	TCAGCATTAGCTGGCCCAGAATAG	GCAGCAT-AGTGAGCCCAGAANRG	GCAGCATAGTGAGCCCAGAANRG				0	0	0	0	44.71	0	0	0	TTTCAGCATTAGCTGGCCCAGAATAGAAG	0.0454684	0
DNA	1	chr3	171802063	+	4	GCAACATCTGTGAGGTCAGAAAAG	GCAACATCTGTGAGGTCAGAAAAG	GCAGCAT-AGTGAGCCCAGAANRG	GCAGCATAGTGAGCCCAGAANRG				0	0	0	0	42.71	0	0	0	ACAGCAACATCTGTGAGGTCAGAAAAGAA	0.0782069	0
DNA	1	chr3	171005316	+	4	GCAGCATCAGTGCCACTAGAATAG	GCAGCATCAGTGCCACTAGAATAG	GCAGCAT-AGTGAGCCCAGAANRG	GCAGCATAGTGAGCCCAGAANRG				0	0	0	0	40.13	0	0	0	CATGCAGCATCAGTGCCACTAGAATAGGC	0.100347	0
DNA	1	chr3	147405193	+	3	GCAGCATCCGGGTGCCCAGAATAG	GCAGCATCCGGGTGCCCAGAATAG	GCAGCAT-AGTGAGCCCAGAANRG	GCAGCATAGTGAGCCCAGAANRG				0	0	0	0	45.28	0	0	0	TGGGCAGCATCCGGGTGCCCAGAATAGAG	0.127437	0
DNA	1	chr3	135624012	+	4	GCAGCCTGAGTGTGCTCAGAGAGG	GCAGCCTGAGTGTGCTCAGAGAGG	GCAGCAT-AGTGAGCCCAGAANRG	GCAGCATAGTGAGCCCAGAANRG				0	0	0	0	43.82	0	0	0	AAAGCAGCCTGAGTGTGCTCAGAGAGGGG	0.0918064	0
DNA	1	chr3	128379918	-	4	GGAGCATGTGTGGGCCCAGAGAGG	GGAGCATGTGTGGGCCCAGAGAGG	GCAGCAT-AGTGAGCCCAGAANRG	GCAGCATAGTGAGCCCAGAANRG				0	0	0	0	45.85	0	0	0	GTGGAGCATGTGTGGGCCCAGAGAGGCTG	0.0776388	0
DNA	1	chr3	127183473	-	4	GCAGCATAACTGAGCTGAGGACAG	GCAGCATAACTGAGCTGAGGACAG	GCAGCAT-AGTGAGCCCAGAANRG	GCAGCATAGTGAGCCCAGAANRG				0	0	0	0	35.63	0	0	0	GGGCAGCATAACTGAGCTGAGGACAGGCT	0.022253	0
DNA	1	chr3	124915488	+	4	GATGCTTAAGTGAGCCCAGCAGAG	GATGCTTAAGTGAGCCCAGCAGAG	GCAGCAT-AGTGAGCCCAGAANRG	GCAGCATAGTGAGCCCAGAANRG				0	0	0	0	40.94	0	0	0	GCAGATGCTTAAGTGAGCCCAGCAGAGAT	0.0878199	0
DNA	1	chr3	104590508	+	4	ACAAAATAGAGAGCCCAGAAATAG	ACAAAATAGAGAGCCCAGAAATAG	GCAGCATAGTGAGCCCAG-AANRG	GCAGCATAGTGAGCCCAGAANRG				0	0	0	0	41.72	0	0	0	GGAACAAAATAGAGAGCCCAGAAATAGAC	0.308224	0
DNA	1	chr3	88819615	-	4	GAAGTATAATGAGCCCAGATATAG	GAAGTATAATGAGCCCAGATATAG	GCAGCATAGTGAGCCCAG-AANRG	GCAGCATAGTGAGCCCAGAANRG				0	0	0	0	36.03	0	0	0	AAGAAGTATAATGAGCCCAGATATAGGCC	0.129323	0
DNA	1	chr3	82525994	-	4	GCAGAATAGAGAACCCAGATATAG	GCAGAATAGAGAACCCAGATATAG	GCAGCATAGTGAGCCCAG-AANRG	GCAGCATAGTGAGCCCAGAANRG				0	0	0	0	34.91	0	0	0	GAGCAGAATAGAGAACCCAGATATAGATC	0.119645	0
DNA	1	chr3	78530934	-	4	GCAATATAGTGAGTACAGGAAGGG	GCAATATAGTGAGTACAGGAAGGG	GCAGCATAGTGAGCCCAG-AANRG	GCAGCATAGTGAGCCCAGAANRG				0	0	0	0	39.14	0	0	0	AGGCAATATAGTGAGTACAGGAAGGGGAG	0.0923206	0
DNA	1	chr3	78334763	-	4	ACAGAACAGAGAGCCCAGAAATAG	ACAGAACAGAGAGCCCAGAAATAG	GCAGCATAGTGAGCCCAG-AANRG	GCAGCATAGTGAGCCCAGAANRG				0	0	0	0	41.66	0	0	0	GAACAGAACAGAGAGCCCAGAAATAGACC	0.0655568	0
DNA	1	chr3	78204149	+	4	ACAGAAGAGAGAGCCCAGCAAGAG	ACAGAAGAGAGAGCCCAGCAAGAG	GCAGCATAGTGAGCCCAG-AANRG	GCAGCATAGTGAGCCCAGAANRG				0	0	0	0	41.66	0	0	0	ACTACAGAAGAGAGAGCCCAGCAAGAGAT	0.093396	0
DNA	1	chr3	75074648	-	3	GCAGAATAGAGAGCCCAGAATTAG	GCAGAATAGAGAGCCCAGAATTAG	GCAGCATAGTGAGCCCAG-AANRG	GCAGCATAGTGAGCCCAGAANRG				0	0	0	0	42.01	0	0	0	GAGCAGAATAGAGAGCCCAGAATTAGACC	0.313838	0
DNA	1	chr3	73689984	-	3	ACAGAATAGAGAGCCCAGAAATAG	ACAGAATAGAGAGCCCAGAAATAG	GCAGCATAGTGAGCCCAG-AANRG	GCAGCATAGTGAGCCCAGAANRG				0	0	0	0	41.89	0	0	0	GAACAGAATAGAGAGCCCAGAAATAGACT	0.118474	0
DNA	1	chr3	71606081	+	4	ACAGAATAGAGAGTCCAGAAATAG	ACAGAATAGAGAGTCCAGAAATAG	GCAGCATAGTGAGCCCAG-AANRG	GCAGCATAGTGAGCCCAGAANRG				0	0	0	0	40.59	0	0	0	AGAACAGAATAGAGAGTCCAGAAATAGAT	0.284288	0
DNA	1	chr3	71515787	+	4	CCAGGGTAGTGAGACCAGGAAGAG	CCAGGGTAGTGAGACCAGGAAGAG	GCAGCATAGTGAGCCCAG-AANRG	GCAGCATAGTGAGCCCAGAANRG				0	0	0	0	40.88	0	0	0	CTACCAGGGTAGTGAGACCAGGAAGAGAT	0.0667886	0
DNA	1	chr3	105796260	+	4	ACAGAATAGACAGCCCAGAAATAG	ACAGAATAGACAGCCCAGAAATAG	GCAGCATAGTGAGCCCAG-AANRG	GCAGCATAGTGAGCCCAGAANRG				0	0	0	0	41.19	0	0	0	GGAACAGAATAGACAGCCCAGAAATAGTA	0.299999	0
DNA	1	chr3	67774706	-	4	TGAGCGTGGTGAGCCCAGTAAAGG	TGAGCGTGGTGAGCCCAGTAAAGG	GCAGCATAGTGAGCCCAG-AANRG	GCAGCATAGTGAGCCCAGAANRG				0	0	0	0	41.97	0	0	0	GTTGAGCGTGGTGAGCCCAGTAAAGGGGC	0.0734447	0
DNA	1	chr3	60297628	-	3	CCAGCACAGTGAGCCAAGGAAAGG	CCAGCACAGTGAGCCAAGGAAAGG	GCAGCATAGTGAGCCCAG-AANRG	GCAGCATAGTGAGCCCAGAANRG				0	0	0	0	40.05	0	0	0	TGCCAGCACAGTGAGCCAAGGAAAGGAAA	0.215438	0
DNA	1	chr3	60296963	-	4	ACAGAATAGAGAACCCAGAAACAG	ACAGAATAGAGAACCCAGAAACAG	GCAGCATAGTGAGCCCAG-AANRG	GCAGCATAGTGAGCCCAGAANRG				0	0	0	0	40.79	0	0	0	CAACAGAATAGAGAACCCAGAAACAGACC	0.0626692	0
DNA	1	chr3	57411991	+	4	ACAGAATAGAGAGCCCAGATATAG	ACAGAATAGAGAGCCCAGATATAG	GCAGCATAGTGAGCCCAG-AANRG	GCAGCATAGTGAGCCCAGAANRG				0	0	0	0	35.89	0	0	0	GGAACAGAATAGAGAGCCCAGATATAGAC	0.315317	0
DNA	1	chr3	53828041	+	4	ACAGAACAGAGAGCCCAGAAATAG	ACAGAACAGAGAGCCCAGAAATAG	GCAGCATAGTGAGCCCAG-AANRG	GCAGCATAGTGAGCCCAGAANRG				0	0	0	0	41.66	0	0	0	GGAACAGAACAGAGAGCCCAGAAATAGAC	0.31533	0
DNA	1	chr3	49447895	+	4	GCGACATAGTGAGGCCAGACACGG	GCGACATAGTGAGGCCAGACACGG	GCAGCATAGTGAGCCCAG-AANRG	GCAGCATAGTGAGCCCAGAANRG				0	0	0	0	35.08	0	0	0	TGGGCGACATAGTGAGGCCAGACACGGTG	0.287107	0
DNA	1	chr3	46827905	-	4	ACAGGATAGAGAGTCCAGAAATAG	ACAGGATAGAGAGTCCAGAAATAG	GCAGCATAGTGAGCCCAG-AANRG	GCAGCATAGTGAGCCCAGAANRG				0	0	0	0	40.59	0	0	0	AAACAGGATAGAGAGTCCAGAAATAGGCC	0.0432689	0
DNA	1	chr3	46782293	+	2	GCAGAATAGTAAGCCCAGAAATAG	GCAGAATAGTAAGCCCAGAAATAG	GCAGCATAGTGAGCCCAG-AANRG	GCAGCATAGTGAGCCCAGAANRG				0	0	0	0	41.81	0	0	0	AAAGCAGAATAGTAAGCCCAGAAATAGAC	0.733888	0
DNA	1	chr3	46373150	-	1	GCAGCATAGTGAGCCCAGAAGGGG	GCAGCATAGTGAGCCCAGAAGGGG	GCAGCATAGTGAGCCCAG-AANRG	GCAGCATAGTGAGCCCAGAANRG				0	0	0	0	42.7	0	0	0	CGGCAGCATAGTGAGCCCAGAAGGGGACA	0.710145	0
DNA	1	chr3	46357811	-	3	GCAGCAGAGTGAGCCCACAATGGG	GCAGCAGAGTGAGCCCACAATGGG	GCAGCATAGTGAGCCCAG-AANRG	GCAGCATAGTGAGCCCAGAANRG				0	0	0	0	38.47	0	0	0	TTGCAGCAGAGTGAGCCCACAATGGGAGA	0.418973	0
DNA	1	chr3	46165696	-	4	ACAGAATAGGCAGCCCAGAAATAG	ACAGAATAGGCAGCCCAGAAATAG	GCAGCATAGTGAGCCCAG-AANRG	GCAGCATAGTGAGCCCAGAANRG				0	0	0	0	41.19	0	0	0	GAACAGAATAGGCAGCCCAGAAATAGAGC	0.0405967	0
DNA	1	chr3	67067044	+	4	GCAGAATAGAGAGTTCAGAAATAG	GCAGAATAGAGAGTTCAGAAATAG	GCAGCATAGTGAGCCCAG-AANRG	GCAGCATAGTGAGCCCAGAANRG				0	0	0	0	38.81	0	0	0	GCTGCAGAATAGAGAGTTCAGAAATAGAC	0.28765	0
DNA	1	chr3	44354237	-	3	ACAGAATAGAGAGCCCAGAAATAG	ACAGAATAGAGAGCCCAGAAATAG	GCAGCATAGTGAGCCCAG-AANRG	GCAGCATAGTGAGCCCAGAANRG				0	0	0	0	41.89	0	0	0	AAACAGAATAGAGAGCCCAGAAATAGATT	0.116676	0
DNA	1	chr3	106568620	+	4	ACAGACTAGGGAGCCCAGCAATAG	ACAGACTAGGGAGCCCAGCAATAG	GCAGCATAGTGAGCCCAG-AANRG	GCAGCATAGTGAGCCCAGAANRG				0	0	0	0	41.68	0	0	0	AAAACAGACTAGGGAGCCCAGCAATAGAC	0.075452	0
DNA	1	chr3	108090863	+	4	GCAGCACGCCGAGCCCAGCAACAG	GCAGCACGCCGAGCCCAGCAACAG	GCAGCATAGTGAGCCCAG-AANRG	GCAGCATAGTGAGCCCAGAANRG				0	0	0	0	41.35	0	0	0	ACCGCAGCACGCCGAGCCCAGCAACAGCG	0.122976	0
DNA	1	chr3	171781132	+	4	ACAGGATAGAGAGCTCAGAAATAG	ACAGGATAGAGAGCTCAGAAATAG	GCAGCATAGTGAGCCCAG-AANRG	GCAGCATAGTGAGCCCAGAANRG				0	0	0	0	39.99	0	0	0	ACAACAGGATAGAGAGCTCAGAAATAGAT	0.290874	0
DNA	1	chr3	170766533	-	4	GCTGCAGAGTGAGCACAGCAGAAG	GCTGCAGAGTGAGCACAGCAGAAG	GCAGCATAGTGAGCCCAG-AANRG	GCAGCATAGTGAGCCCAGAANRG				0	0	0	0	40.42	0	0	0	GAGCTGCAGAGTGAGCACAGCAGAAGTCC	0.025698	0
DNA	1	chr3	169836840	+	4	GGAGCAGAGTGAGCCAGGGAAAAG	GGAGCAGAGTGAGCCAGGGAAAAG	GCAGCATAGTGAGCCCAG-AANRG	GCAGCATAGTGAGCCCAGAANRG				0	0	0	0	37.04	0	0	0	GCTGGAGCAGAGTGAGCCAGGGAAAAGGG	0.0307288	0
DNA	1	chr3	164166999	+	4	GCAAAATAGAGAGTCCAGAAATAG	GCAAAATAGAGAGTCCAGAAATAG	GCAGCATAGTGAGCCCAG-AANRG	GCAGCATAGTGAGCCCAGAANRG				0	0	0	0	40.54	0	0	0	AGAGCAAAATAGAGAGTCCAGAAATAGAG	0.288733	0
DNA	1	chr3	160160212	+	4	GCAGCCTACTGACCCCAGCACAGG	GCAGCCTACTGACCCCAGCACAGG	GCAGCATAGTGAGCCCAG-AANRG	GCAGCATAGTGAGCCCAGAANRG				0	0	0	0	41.04	0	0	0	TCAGCAGCCTACTGACCCCAGCACAGGGT	0.141721	0
DNA	1	chr3	154884380	+	4	ACAGAATAGAGATCCCAGAAACAG	ACAGAATAGAGATCCCAGAAACAG	GCAGCATAGTGAGCCCAG-AANRG	GCAGCATAGTGAGCCCAGAANRG				0	0	0	0	40.79	0	0	0	AGAACAGAATAGAGATCCCAGAAACAGAC	0.182113	0
DNA	1	chr3	151524211	+	4	GAAGCATAGTGATTCCTGAAAGAG	GAAGCATAGTGATTCCTGAAAGAG	GCAGCATAGTGAGCCCAG-AANRG	GCAGCATAGTGAGCCCAGAANRG				0	0	0	0	37.17	0	0	0	AAAGAAGCATAGTGATTCCTGAAAGAGCT	0.238312	0
DNA	1	chr3	148591169	+	4	ACAGAATAGAGAGCCCAGATATAG	ACAGAATAGAGAGCCCAGATATAG	GCAGCATAGTGAGCCCAG-AANRG	GCAGCATAGTGAGCCCAGAANRG				0	0	0	0	35.89	0	0	0	GGAACAGAATAGAGAGCCCAGATATAGAC	0.315317	0
DNA	1	chr3	147397633	+	4	GCAGCATCGTGTGCGCAGAGATGG	GCAGCATCGTGTGCGCAGAGATGG	GCAGCATAGTGAGCCCAG-AANRG	GCAGCATAGTGAGCCCAGAANRG				0	0	0	0	33.73	0	0	0	TGGGCAGCATCGTGTGCGCAGAGATGGCG	0.283742	0
DNA	1	chr3	139956932	-	4	GCAGCCTGCTAAGCCCAGAAAGAG	GCAGCCTGCTAAGCCCAGAAAGAG	GCAGCATAGTGAGCCCAG-AANRG	GCAGCATAGTGAGCCCAGAANRG				0	0	0	0	41.17	0	0	0	AAGCAGCCTGCTAAGCCCAGAAAGAGGGG	0.0444126	0
DNA	1	chr3	107867424	+	4	GCTGTATAGTGAGTCCAAGAAAAG	GCTGTATAGTGAGTCCAAGAAAAG	GCAGCATAGTGAGCCCAG-AANRG	GCAGCATAGTGAGCCCAGAANRG				0	0	0	0	37.06	0	0	0	TCAGCTGTATAGTGAGTCCAAGAAAAGTC	0.0599935	0
DNA	1	chr3	138144366	+	4	ACAGAATAGACAGCCCAGAAATAG	ACAGAATAGACAGCCCAGAAATAG	GCAGCATAGTGAGCCCAG-AANRG	GCAGCATAGTGAGCCCAGAANRG				0	0	0	0	41.19	0	0	0	GAAACAGAATAGACAGCCCAGAAATAGAT	0.308805	0
DNA	1	chr3	135543904	-	4	ACAGAATAGAGAGCCCCGAAATAG	ACAGAATAGAGAGCCCCGAAATAG	GCAGCATAGTGAGCCCAG-AANRG	GCAGCATAGTGAGCCCAGAANRG				0	0	0	0	38.89	0	0	0	GGACAGAATAGAGAGCCCCGAAATAGACC	0.0366003	0
DNA	1	chr3	134909051	+	4	GGAGCATATAGAGCTCAGCAATGG	GGAGCATATAGAGCTCAGCAATGG	GCAGCATAGTGAGCCCAG-AANRG	GCAGCATAGTGAGCCCAGAANRG				0	0	0	0	39.82	0	0	0	CGTGGAGCATATAGAGCTCAGCAATGGGT	0.0451441	0
DNA	1	chr3	132563147	-	4	GCAGAAGAGAGAGTCCAGGAATAG	GCAGAAGAGAGAGTCCAGGAATAG	GCAGCATAGTGAGCCCAG-AANRG	GCAGCATAGTGAGCCCAGAANRG				0	0	0	0	40.48	0	0	0	GAGCAGAAGAGAGAGTCCAGGAATAGATT	0.042992	0
DNA	1	chr3	132306916	-	3	TCAGCAGAGTGTGCCCAGGAAAGG	TCAGCAGAGTGTGCCCAGGAAAGG	GCAGCATAGTGAGCCCAG-AANRG	GCAGCATAGTGAGCCCAGAANRG				0	0	0	0	41.55	0	0	0	ATTCAGCAGAGTGTGCCCAGGAAAGGTCC	0.144031	0
DNA	1	chr3	130613335	-	3	ACAGAATAGAGAGCCCAGAAATAG	ACAGAATAGAGAGCCCAGAAATAG	GCAGCATAGTGAGCCCAG-AANRG	GCAGCATAGTGAGCCCAGAANRG				0	0	0	0	41.89	0	0	0	GAACAGAATAGAGAGCCCAGAAATAGAGC	0.122859	0
DNA	1	chr3	126229057	-	4	ACAGAGTAGAGAGCCCAGAAATAG	ACAGAGTAGAGAGCCCAGAAATAG	GCAGCATAGTGAGCCCAG-AANRG	GCAGCATAGTGAGCCCAGAANRG				0	0	0	0	41.68	0	0	0	GAACAGAGTAGAGAGCCCAGAAATAGATT	0.0469341	0
DNA	1	chr3	125905009	-	4	GGAGCATAGTGTGTCCAGAACTGG	GGAGCATAGTGTGTCCAGAACTGG	GCAGCATAGTGAGCCCAG-AANRG	GCAGCATAGTGAGCCCAGAANRG				0	0	0	0	40.47	0	0	0	GTGGAGCATAGTGTGTCCAGAACTGGTGG	0.196902	0
DNA	1	chr3	124955673	-	4	ACAGAATAGAGAACCCAGAAATAG	ACAGAATAGAGAACCCAGAAATAG	GCAGCATAGTGAGCCCAG-AANRG	GCAGCATAGTGAGCCCAGAANRG				0	0	0	0	40.79	0	0	0	GAACAGAATAGAGAACCCAGAAATAGTCA	0.0542231	0
DNA	1	chr3	122474495	+	3	ACAGAATAGAGAGCCCAGAAATAG	ACAGAATAGAGAGCCCAGAAATAG	GCAGCATAGTGAGCCCAG-AANRG	GCAGCATAGTGAGCCCAGAANRG				0	0	0	0	41.89	0	0	0	GAAACAGAATAGAGAGCCCAGAAATAGAC	0.454716	0
DNA	1	chr3	119241562	-	4	GAAGCTTAATGAGCCCAGCACTGG	GAAGCTTAATGAGCCCAGCACTGG	GCAGCATAGTGAGCCCAG-AANRG	GCAGCATAGTGAGCCCAGAANRG				0	0	0	0	42.01	0	0	0	ATGAAGCTTAATGAGCCCAGCACTGGCTC	0.0435151	0
DNA	1	chr3	136557286	+	3	GCAGAATAGAGAACCCAGAAAAAG	GCAGAATAGAGAACCCAGAAAAAG	GCAGCATAGTGAGCCCAG-AANRG	GCAGCATAGTGAGCCCAGAANRG				0	0	0	0	40.91	0	0	0	TTAGCAGAATAGAGAACCCAGAAAAAGAC	0.343242	0
DNA	1	chr3	41572956	+	4	GCATCATTGAGAGCCCACAAAAGG	GCATCATTGAGAGCCCACAAAAGG	GCAGCATAGTGAGCCCAG-AANRG	GCAGCATAGTGAGCCCAGAANRG				0	0	0	0	37.76	0	0	0	ATGGCATCATTGAGAGCCCACAAAAGGCA	0.135594	0
DNA	1	chr3	41295114	+	4	ATAGAATAGAGAGCCCAGAAACAG	ATAGAATAGAGAGCCCAGAAACAG	GCAGCATAGTGAGCCCAG-AANRG	GCAGCATAGTGAGCCCAGAANRG				0	0	0	0	41.76	0	0	0	GGAATAGAATAGAGAGCCCAGAAACAGAC	0.205354	0
DNA	1	chr3	37400489	-	4	ACAGAATTGTGAGCCCATAAACAG	ACAGAATTGTGAGCCCATAAACAG	GCAGCATAGTGAGCCCAG-AANRG	GCAGCATAGTGAGCCCAGAANRG				0	0	0	0	38.12	0	0	0	CCACAGAATTGTGAGCCCATAAACAGTTG	0.0532773	0
DNA	1	chr3	35825211	-	4	ACAGAATACTGAGCCTAGAAATAG	ACAGAATACTGAGCCTAGAAATAG	GCAGCATAGTGAGCCCAG-AANRG	GCAGCATAGTGAGCCCAGAANRG				0	0	0	0	39.74	0	0	0	TAACAGAATACTGAGCCTAGAAATAGTCT	0.0399506	0
DNA	1	chr3	35532061	+	3	ACAGAATAGAGAGCCCAGAAAGAG	ACAGAATAGAGAGCCCAGAAAGAG	GCAGCATAGTGAGCCCAG-AANRG	GCAGCATAGTGAGCCCAGAANRG				0	0	0	0	41.89	0	0	0	TGAACAGAATAGAGAGCCCAGAAAGAGAC	0.424347	0
DNA	1	chr3	33176915	-	4	TCAGAGTAGAGAGCCCAGAAATAG	TCAGAGTAGAGAGCCCAGAAATAG	GCAGCATAGTGAGCCCAG-AANRG	GCAGCATAGTGAGCCCAGAANRG				0	0	0	0	41.68	0	0	0	GATCAGAGTAGAGAGCCCAGAAATAGACC	0.0367514	0
DNA	1	chr3	26816564	+	4	ACAGAATAGAGACCCCAGAAATAG	ACAGAATAGAGACCCCAGAAATAG	GCAGCATAGTGAGCCCAG-AANRG	GCAGCATAGTGAGCCCAGAANRG				0	0	0	0	40.79	0	0	0	GTAACAGAATAGAGACCCCAGAAATAGAT	0.287618	0
DNA	1	chr3	22789721	+	4	ACAGAATAGACAGCCCAGAAATAG	ACAGAATAGACAGCCCAGAAATAG	GCAGCATAGTGAGCCCAG-AANRG	GCAGCATAGTGAGCCCAGAANRG				0	0	0	0	41.19	0	0	0	GAAACAGAATAGACAGCCCAGAAATAGAC	0.306742	0
DNA	1	chr3	20629809	-	4	ACAGAATAGAGAGTCCAGAAATAG	ACAGAATAGAGAGTCCAGAAATAG	GCAGCATAGTGAGCCCAG-AANRG	GCAGCATAGTGAGCCCAGAANRG				0	0	0	0	40.59	0	0	0	CAACAGAATAGAGAGTCCAGAAATAGAGC	0.0475215	0
DNA	1	chr3	19881204	+	4	CCTGCAGAGTGAGCTCAGGAATGG	CCTGCAGAGTGAGCTCAGGAATGG	GCAGCATAGTGAGCCCAG-AANRG	GCAGCATAGTGAGCCCAGAANRG				0	0	0	0	40.3	0	0	0	GCCCCTGCAGAGTGAGCTCAGGAATGGTT	0.0790033	0
DNA	1	chr3	18028920	+	4	GGAGCATAGTGAGCAAAGAAGGAG	GGAGCATAGTGAGCAAAGAAGGAG	GCAGCATAGTGAGCCCAG-AANRG	GCAGCATAGTGAGCCCAGAANRG				0	0	0	0	38.37	0	0	0	ACAGGAGCATAGTGAGCAAAGAAGGAGGC	0.410992	0
DNA	1	chr3	17648147	+	4	ACAGAATAGAGAGCCAAGAAATAG	ACAGAATAGAGAGCCAAGAAATAG	GCAGCATAGTGAGCCCAG-AANRG	GCAGCATAGTGAGCCCAGAANRG				0	0	0	0	39.59	0	0	0	GGAACAGAATAGAGAGCCAAGAAATAGGG	0.254184	0
DNA	1	chr3	13122694	-	4	GCAGCAAAGTGAAGCCAATAACAG	GCAGCAAAGTGAAGCCAATAACAG	GCAGCATAGTGAGCCCAG-AANRG	GCAGCATAGTGAGCCCAGAANRG				0	0	0	0	36.07	0	0	0	TGGCAGCAAAGTGAAGCCAATAACAGAGA	0.0952239	0
DNA	1	chr3	12365723	-	4	ACAGAATACAGAGCCCAGAAATAG	ACAGAATACAGAGCCCAGAAATAG	GCAGCATAGTGAGCCCAG-AANRG	GCAGCATAGTGAGCCCAGAANRG				0	0	0	0	41.54	0	0	0	GAACAGAATACAGAGCCCAGAAATAGGAC	0.0386538	0
DNA	1	chr3	9516404	-	4	ACAGAATGGAGAGCCCAGAAACAG	ACAGAATGGAGAGCCCAGAAACAG	GCAGCATAGTGAGCCCAG-AANRG	GCAGCATAGTGAGCCCAGAANRG				0	0	0	0	41.62	0	0	0	GGACAGAATGGAGAGCCCAGAAACAGACC	0.054554	0
DNA	1	chr3	8833079	+	4	ACAGAATAGAGAGCCAAGGAATAG	ACAGAATAGAGAGCCAAGGAATAG	GCAGCATAGTGAGCCCAG-AANRG	GCAGCATAGTGAGCCCAGAANRG				0	0	0	0	39.59	0	0	0	GCGACAGAATAGAGAGCCAAGGAATAGAC	0.0867494	0
DNA	1	chr3	7946497	+	4	GAAGCACAGATAGCCCAGAAAAAG	GAAGCACAGATAGCCCAGAAAAAG	GCAGCATAGTGAGCCCAG-AANRG	GCAGCATAGTGAGCCCAGAANRG				0	0	0	0	41.14	0	0	0	ATGGAAGCACAGATAGCCCAGAAAAAGAC	0.163254	0
DNA	1	chr3	2117355	-	4	GGAGGGTAGTGTGCCCAGAAAGGG	GGAGGGTAGTGTGCCCAGAAAGGG	GCAGCATAGTGAGCCCAG-AANRG	GCAGCATAGTGAGCCCAGAANRG				0	0	0	0	41.37	0	0	0	CTGGAGGGTAGTGTGCCCAGAAAGGGCAT	0.0772323	0
DNA	1	chr3	1294791	-	4	GCATTATAGGGAGCCCAGAGAAGG	GCATTATAGGGAGCCCAGAGAAGG	GCAGCATAGTGAGCCCAG-AANRG	GCAGCATAGTGAGCCCAGAANRG				0	0	0	0	35.84	0	0	0	AGGCATTATAGGGAGCCCAGAGAAGGAGC	0.235875	0
DNA	1	chr3	330880	+	4	ATAGCATAGTAAACCCAGAAACAG	ATAGCATAGTAAACCCAGAAACAG	GCAGCATAGTGAGCCCAG-AANRG	GCAGCATAGTGAGCCCAGAANRG				0	0	0	0	40.65	0	0	0	AGAATAGCATAGTAAACCCAGAAACAGAC	0.271145	0
DNA	1	chr3	180597177	+	4	ACAGAATAAAGAGCCCAGAAATAG	ACAGAATAAAGAGCCCAGAAATAG	GCAGCATAGTGAGCCCAG-AANRG	GCAGCATAGTGAGCCCAGAANRG				0	0	0	0	41.54	0	0	0	GGAACAGAATAAAGAGCCCAGAAATAGAC	0.323119	0
DNA	1	chr3	188079297	+	4	ACAGAATATAGAGCCCAGAAATAG	ACAGAATATAGAGCCCAGAAATAG	GCAGCATAGTGAGCCCAG-AANRG	GCAGCATAGTGAGCCCAGAANRG				0	0	0	0	41.54	0	0	0	AGAACAGAATATAGAGCCCAGAAATAGAC	0.309166	0
DNA	1	chr3	190135499	+	3	ACAGAATAGAGAGCCCAGAAATAG	ACAGAATAGAGAGCCCAGAAATAG	GCAGCATAGTGAGCCCAG-AANRG	GCAGCATAGTGAGCCCAGAANRG				0	0	0	0	41.89	0	0	0	GGAACAGAATAGAGAGCCCAGAAATAGAC	0.453381	0
RNA	1	chr3	15440658	+	3	TCATCATAGTGAGCCCA-GAGAG	TCATCATAGTGAGCCCAGAGAG	GCAGCATAGTGAGCCCAGAANRG	GCAGCATAGTGAGCCCAGAANRG				0	0	0	0	38.6	0	0	0	TCATCATCATAGTGAGCCCAGAGAGCCAC	0.474712	0
RNA	1	chr3	74145688	+	3	GCAGCAAGGTGAGTCCA-AAAGG	GCAGCAAGGTGAGTCCAAAAGG	GCAGCATAGTGAGCCCAGAANRG	GCAGCATAGTGAGCCCAGAANRG				0	0	0	0	42.09	0	0	0	ACGGCAGCAAGGTGAGTCCAAAAGGAATG	0.321049	0
RNA	1	chr3	46373152	-	1	GCAGCATAGTGAGCCCA-GAAGG	GCAGCATAGTGAGCCCAGAAGG	GCAGCATAGTGAGCCCAGAANRG	GCAGCATAGTGAGCCCAGAANRG				0	0	0	0	38.89	0	0	0	GGCGGCAGCATAGTGAGCCCAGAAGGGGA	0.514849	0
RNA	1	chr3	171226873	+	3	GTAACAAAGTGAGCCCA-AAAGG	GTAACAAAGTGAGCCCAAAAGG	GCAGCATAGTGAGCCCAGAANRG	GCAGCATAGTGAGCCCAGAANRG				0	0	0	0	43.36	0	0	0	AAGGTAACAAAGTGAGCCCAAAAGGTATG	0.360092	0
RNA	1	chr3	156993065	-	3	GCAGCATAGTATGCCTA-AAAAG	GCAGCATAGTATGCCTAAAAAG	GCAGCATAGTGAGCCCAGAANRG	GCAGCATAGTGAGCCCAGAANRG				0	0	0	0	40.09	0	0	0	TTAAGCAGCATAGTATGCCTAAAAAGAAA	0.0813441	0
RNA	1	chr3	134475576	-	2	GCAGCAGAGTGAGGCCA-AATGG	GCAGCAGAGTGAGGCCAAATGG	GCAGCATAGTGAGCCCAGAANRG	GCAGCATAGTGAGCCCAGAANRG				0	0	0	0	42.36	0	0	0	CAGTGCAGCAGAGTGAGGCCAAATGGACT	0.228291	0
RNA	1	chr3	131204009	+	3	GCTGCATAGAGAGGCCA-AATGG	GCTGCATAGAGAGGCCAAATGG	GCAGCATAGTGAGCCCAGAANRG	GCAGCATAGTGAGCCCAGAANRG				0	0	0	0	41.94	0	0	0	GATGCTGCATAGAGAGGCCAAATGGAATC	0.0507735	0
DNA	1	chr3	195143339	-	4	GCACCAGACTGAGCCCAAGAATGG	GCACCAGACTGAGCCCAAGAATGG	GCAGCATAGTGAGCCCAG-AANRG	GCAGCATAGTGAGCCCAGAANRG				0	0	0	0	37.95	0	0	0	GTGCACCAGACTGAGCCCAAGAATGGCCA	0.159635	0
DNA	1	chr3	195007511	+	4	GCAGAAAAGAGACCCCAGAAACAG	GCAGAAAAGAGACCCCAGAAACAG	GCAGCATAGTGAGCCCAG-AANRG	GCAGCATAGTGAGCCCAGAANRG				0	0	0	0	40.68	0	0	0	AGGGCAGAAAAGAGACCCCAGAAACAGAC	0.154271	0
DNA	1	chr3	194790545	-	4	ACAGAATAGAGAACCCAGAAATAG	ACAGAATAGAGAACCCAGAAATAG	GCAGCATAGTGAGCCCAG-AANRG	GCAGCATAGTGAGCCCAGAANRG				0	0	0	0	40.79	0	0	0	GAACAGAATAGAGAACCCAGAAATAGATT	0.0595652	0
DNA	1	chr3	194289139	+	4	ACAGAATAGAGAACCCAGAAATGG	ACAGAATAGAGAACCCAGAAATGG	GCAGCATAGTGAGCCCAG-AANRG	GCAGCATAGTGAGCCCAGAANRG				0	0	0	0	40.79	0	0	0	GAAACAGAATAGAGAACCCAGAAATGGGT	0.307266	0
DNA	1	chr3	193740694	-	4	ACAGAATAGACAGCCCAGAAATAG	ACAGAATAGACAGCCCAGAAATAG	GCAGCATAGTGAGCCCAG-AANRG	GCAGCATAGTGAGCCCAGAANRG				0	0	0	0	41.19	0	0	0	AAACAGAATAGACAGCCCAGAAATAGATC	0.0430051	0
DNA	1	chr3	190187376	+	4	GCAGTTCAGTGAGCCAAGGAAAAG	GCAGTTCAGTGAGCCAAGGAAAAG	GCAGCATAGTGAGCCCAG-AANRG	GCAGCATAGTGAGCCCAGAANRG				0	0	0	0	39.77	0	0	0	TATGCAGTTCAGTGAGCCAAGGAAAAGAT	0.0431448	0
DNA	1	chr3	189377337	-	4	ACAGAATACAGAGCCCAGAAATAG	ACAGAATACAGAGCCCAGAAATAG	GCAGCATAGTGAGCCCAG-AANRG	GCAGCATAGTGAGCCCAGAANRG				0	0	0	0	41.54	0	0	0	GAACAGAATACAGAGCCCAGAAATAGACC	0.039371	0
RNA	1	chr7	132973617	-	3	GCAA-ATAGTGAAGCCAGAATAG	GCAAATAGTGAAGCCAGAATAG	GCAGCATAGTGAGCCCAGAANRG	GCAGCATAGTGAGCCCAGAANRG				0	0	0	0	45.13	0	0	0	ATGGGCAAATAGTGAAGCCAGAATAGAGG	0.0982784	0
RNA	1	chr7	122891700	+	3	GCAA-ATATTTAGCCCAGAAGAG	GCAAATATTTAGCCCAGAAGAG	GCAGCATAGTGAGCCCAGAANRG	GCAGCATAGTGAGCCCAGAANRG				0	0	0	0	46.48	0	0	0	GAAGCAAATATTTAGCCCAGAAGAGAATG	0.131995	0
RNA	1	chr7	86981337	-	2	GCAG-TTAGTGAGCCCAGACTAG	GCAGTTAGTGAGCCCAGACTAG	GCAGCATAGTGAGCCCAGAANRG	GCAGCATAGTGAGCCCAGAANRG				0	0	0	0	41.49	0	0	0	AATGGCAGTTAGTGAGCCCAGACTAGTCT	0.246355	0
RNA	1	chr7	43944534	-	3	GCAG-CTGGTGAGCACAGAAGGG	GCAGCTGGTGAGCACAGAAGGG	GCAGCATAGTGAGCCCAGAANRG	GCAGCATAGTGAGCCCAGAANRG				0	0	0	0	45.32	0	0	0	AGCTGCAGCTGGTGAGCACAGAAGGGGCT	0.249757	0
RNA	1	chr7	36186188	-	3	GCAG-AGAGTGGGCCCAGAGAGG	GCAGAGAGTGGGCCCAGAGAGG	GCAGCATAGTGAGCCCAGAANRG	GCAGCATAGTGAGCCCAGAANRG				0	0	0	0	40.67	0	0	0	CCCAGCAGAGAGTGGGCCCAGAGAGGTGT	0.130877	0
RNA	1	chr7	31993384	+	3	GCAG-ACAGGGAGCCTAGAAGGG	GCAGACAGGGAGCCTAGAAGGG	GCAGCATAGTGAGCCCAGAANRG	GCAGCATAGTGAGCCCAGAANRG				0	0	0	0	44.67	0	0	0	AGGGCAGACAGGGAGCCTAGAAGGGTATG	0.145571	0
RNA	1	chr7	138491307	-	3	GCAGCAAAGGGAGCCAA-AAAGG	GCAGCAAAGGGAGCCAAAAAGG	GCAGCATAGTGAGCCCAGAANRG	GCAGCATAGTGAGCCCAGAANRG				0	0	0	0	40.86	0	0	0	AAAGGCAGCAAAGGGAGCCAAAAAGGTAG	0.156987	0
RNA	1	chr7	63407186	-	3	GCAACATAGTGAGACCA-CATGG	GCAACATAGTGAGACCACATGG	GCAGCATAGTGAGCCCAGAANRG	GCAGCATAGTGAGCCCAGAANRG				0	0	0	0	37.42	0	0	0	CTGGGCAACATAGTGAGACCACATGGCTA	0.105707	0
RNA	1	chr7	63340912	+	3	GCAACATAGTGAGACCA-CATGG	GCAACATAGTGAGACCACATGG	GCAGCATAGTGAGCCCAGAANRG	GCAGCATAGTGAGCCCAGAANRG				0	0	0	0	37.42	0	0	0	TGGGCAACATAGTGAGACCACATGGCTAC	0.302471	0
DNA	1	chr7	145201700	-	3	ACAGAATAGAGAGCCCAGAAATAG	ACAGAATAGAGAGCCCAGAAATAG	GCAGCATAGTGAGCCCAG-AANRG	GCAGCATAGTGAGCCCAGAANRG				0	0	0	0	41.89	0	0	0	GGACAGAATAGAGAGCCCAGAAATAGATC	0.118143	0
DNA	1	chr7	88455435	+	3	GCCTCATAGTAAGCCCAGCAAGGG	GCCTCATAGTAAGCCCAGCAAGGG	GCAGCATAGTGAGCCCAG-AANRG	GCAGCATAGTGAGCCCAGAANRG				0	0	0	0	41.68	0	0	0	AAGGCCTCATAGTAAGCCCAGCAAGGGCA	0.360885	0
DNA	1	chr7	63601926	+	3	GCAGAATAGAAAGCCCAGAAATAG	GCAGAATAGAAAGCCCAGAAATAG	GCAGCATAGTGAGCCCAG-AANRG	GCAGCATAGTGAGCCCAGAANRG				0	0	0	0	41.31	0	0	0	GGAGCAGAATAGAAAGCCCAGAAATAGAC	0.462886	0
DNA	1	chr7	56974998	-	3	GCAGAATAGAAAGCCCAGAAATAG	GCAGAATAGAAAGCCCAGAAATAG	GCAGCATAGTGAGCCCAG-AANRG	GCAGCATAGTGAGCCCAGAANRG				0	0	0	0	41.31	0	0	0	GAGCAGAATAGAAAGCCCAGAAATAGACA	0.13007	0
DNA	1	chr7	49901831	+	3	ACAGAATAGAGAGCCCAGAAATAG	ACAGAATAGAGAGCCCAGAAATAG	GCAGCATAGTGAGCCCAG-AANRG	GCAGCATAGTGAGCCCAGAANRG				0	0	0	0	41.89	0	0	0	GGAACAGAATAGAGAGCCCAGAAATAGAC	0.453381	0
DNA	1	chr7	36477661	-	2	GCAGAATAGAGAGCCCAGAAATAG	GCAGAATAGAGAGCCCAGAAATAG	GCAGCATAGTGAGCCCAG-AANRG	GCAGCATAGTGAGCCCAGAANRG				0	0	0	0	42.01	0	0	0	GAGCAGAATAGAGAGCCCAGAAATAGAGC	0.294451	0
DNA	1	chr7	19625745	+	2	ACAGCATAGAGAGCCCAGAAATAG	ACAGCATAGAGAGCCCAGAAATAG	GCAGCATAGTGAGCCCAG-AANRG	GCAGCATAGTGAGCCCAGAANRG				0	0	0	0	42.08	0	0	0	GGAACAGCATAGAGAGCCCAGAAATAGAC	0.731654	0
DNA	1	chr7	2339838	+	3	ACAGAATAGAGAGCCCAGAAACGG	ACAGAATAGAGAGCCCAGAAACGG	GCAGCATAGTGAGCCCAG-AANRG	GCAGCATAGTGAGCCCAGAANRG				0	0	0	0	41.89	0	0	0	AGAACAGAATAGAGAGCCCAGAAACGGAA	0.394709	0
DNA	1	chr7	5258561	+	3	GCAGAATAGAAAGCCCAGAAATAG	GCAGAATAGAAAGCCCAGAAATAG	GCAGCATAGTGAGCCCAG-AANRG	GCAGCATAGTGAGCCCAGAANRG				0	0	0	0	41.31	0	0	0	GGAGCAGAATAGAAAGCCCAGAAATAGAC	0.462886	0
RNA	1	chr7	143520713	+	3	GCAGC-AGGTGAGTCCAGAAGAG	GCAGCAGGTGAGTCCAGAAGAG	GCAGCATAGTGAGCCCAGAANRG	GCAGCATAGTGAGCCCAGAANRG				0	0	0	0	45.88	0	0	0	ATTGCAGCAGGTGAGTCCAGAAGAGTGAT	0.231552	0
RNA	1	chr7	124742893	-	3	GCAGC-TAGTGAAGCTAGAAAAG	GCAGCTAGTGAAGCTAGAAAAG	GCAGCATAGTGAGCCCAGAANRG	GCAGCATAGTGAGCCCAGAANRG				0	0	0	0	42.98	0	0	0	TAAAGCAGCTAGTGAAGCTAGAAAAGAAG	0.08167	0
RNA	1	chr7	132669481	+	3	GG-GCAATGTGAGCCCAGAAGAG	GGGCAATGTGAGCCCAGAAGAG	GCAGCATAGTGAGCCCAGAANRG	GCAGCATAGTGAGCCCAGAANRG				0	0	0	0	47.11	0	0	0	GAGGGGCAATGTGAGCCCAGAAGAGCTGA	0.126071	0
DNA	1	chr7	134871264	+	3	GCAGTATACCTGAGCCCAGATGGG	GCAGTATACCTGAGCCCAGATGGG	GCAGCATAG-TGAGCCCAGAANRG	GCAGCATAGTGAGCCCAGAANRG				0	0	0	0	46.66	0	0	0	TATGCAGTATACCTGAGCCCAGATGGGAG	0.166217	0
DNA	1	chr7	52459784	-	3	GCAGCCTCTGTGAGCCCAGAAGAG	GCAGCCTCTGTGAGCCCAGAAGAG	GCAGCATAG-TGAGCCCAGAANRG	GCAGCATAGTGAGCCCAGAANRG				0	0	0	0	46.37	0	0	0	AGGCAGCCTCTGTGAGCCCAGAAGAGGGC	0.341516	0
RNA	1	chr7	64537957	+	3	C-AGAATAGAGAGCCCAGAAAAG	CAGAATAGAGAGCCCAGAAAAG	GCAGCATAGTGAGCCCAGAANRG	GCAGCATAGTGAGCCCAGAANRG				0	0	0	0	46.95	0	0	0	AAACAGAATAGAGAGCCCAGAAAAGAACG	0.198999	0
RNA	1	chr7	96476947	+	3	G-AGCACAGTGAGGCCAGAGGAG	GAGCACAGTGAGGCCAGAGGAG	GCAGCATAGTGAGCCCAGAANRG	GCAGCATAGTGAGCCCAGAANRG				0	0	0	0	40.23	0	0	0	CTAGAGCACAGTGAGGCCAGAGGAGAGTG	0.163033	0
RNA	1	chr7	107714463	+	3	C-AGCTTAGTGAGCCCAGGAAAG	CAGCTTAGTGAGCCCAGGAAAG	GCAGCATAGTGAGCCCAGAANRG	GCAGCATAGTGAGCCCAGAANRG				0	0	0	0	42.43	0	0	0	CACCAGCTTAGTGAGCCCAGGAAAGTCAT	0.394635	0
RNA	1	chr7	121891026	-	3	G-AGGACAGTGAGGCCAGAAGAG	GAGGACAGTGAGGCCAGAAGAG	GCAGCATAGTGAGCCCAGAANRG	GCAGCATAGTGAGCCCAGAANRG				0	0	0	0	46.04	0	0	0	CTAGGAGGACAGTGAGGCCAGAAGAGGGG	0.157096	0
RNA	1	chr7	132669481	+	3	G-GGCAATGTGAGCCCAGAAGAG	GGGCAATGTGAGCCCAGAAGAG	GCAGCATAGTGAGCCCAGAANRG	GCAGCATAGTGAGCCCAGAANRG				0	0	0	0	47.11	0	0	0	GAGGGGCAATGTGAGCCCAGAAGAGCTGA	0.126071	0
RNA	1	chr7	147226508	+	3	G-AGCATTGGGAGCCAAGAAAAG	GAGCATTGGGAGCCAAGAAAAG	GCAGCATAGTGAGCCCAGAANRG	GCAGCATAGTGAGCCCAGAANRG				0	0	0	0	44.69	0	0	0	GAGGAGCATTGGGAGCCAAGAAAAGAAGC	0.0889144	0
RNA	1	chr7	125441342	+	3	GCAGC-TACTGAGACAAGAAGGG	GCAGCTACTGAGACAAGAAGGG	GCAGCATAGTGAGCCCAGAANRG	GCAGCATAGTGAGCCCAGAANRG				0	0	0	0	43.73	0	0	0	TCTGCAGCTACTGAGACAAGAAGGGGTCA	0.118667	0
RNA	1	chr7	97228779	-	3	GCTGC-TAGTAAGACCAGAAGAG	GCTGCTAGTAAGACCAGAAGAG	GCAGCATAGTGAGCCCAGAANRG	GCAGCATAGTGAGCCCAGAANRG				0	0	0	0	45.53	0	0	0	TTTTGCTGCTAGTAAGACCAGAAGAGGAC	0.060098	0
RNA	1	chr7	86981337	-	2	GCAGT-TAGTGAGCCCAGACTAG	GCAGTTAGTGAGCCCAGACTAG	GCAGCATAGTGAGCCCAGAANRG	GCAGCATAGTGAGCCCAGAANRG				0	0	0	0	41.49	0	0	0	AATGGCAGTTAGTGAGCCCAGACTAGTCT	0.246355	0
RNA	1	chr7	85766178	+	3	GCAGC-TAGTGCCCCCAGGAAAG	GCAGCTAGTGCCCCCAGGAAAG	GCAGCATAGTGAGCCCAGAANRG	GCAGCATAGTGAGCCCAGAANRG				0	0	0	0	40.78	0	0	0	CCGGCAGCTAGTGCCCCCAGGAAAGGAGT	0.189008	0
RNA	1	chr7	64792179	-	3	GCAGC-CTGTGGGCCCAGAATAG	GCAGCCTGTGGGCCCAGAATAG	GCAGCATAGTGAGCCCAGAANRG	GCAGCATAGTGAGCCCAGAANRG				0	0	0	0	46.38	0	0	0	TCAGGCAGCCTGTGGGCCCAGAATAGGCT	0.206408	0
RNA	1	chr7	44142271	-	3	GCAGC-CAGTGAGCCCAGCCTGG	GCAGCCAGTGAGCCCAGCCTGG	GCAGCATAGTGAGCCCAGAANRG	GCAGCATAGTGAGCCCAGAANRG				0	0	0	0	36.45	0	0	0	GGCAGCAGCCAGTGAGCCCAGCCTGGGGT	0.16304	0
RNA	1	chr7	43944534	-	2	GCAGC-TGGTGAGCACAGAAGGG	GCAGCTGGTGAGCACAGAAGGG	GCAGCATAGTGAGCCCAGAANRG	GCAGCATAGTGAGCCCAGAANRG				0	0	0	0	45.51	0	0	0	AGCTGCAGCTGGTGAGCACAGAAGGGGCT	0.249757	0
RNA	1	chr7	101592617	+	3	GCAGCAGAG-AAGCCCAGACAGG	GCAGCAGAGAAGCCCAGACAGG	GCAGCATAGTGAGCCCAGAANRG	GCAGCATAGTGAGCCCAGAANRG				0	0	0	0	40.46	0	0	0	GTGGCAGCAGAGAAGCCCAGACAGGAGCT	0.159572	0
RNA	1	chr7	78542414	+	3	GGAGCTTAA-GAGCCCAGAAAAG	GGAGCTTAAGAGCCCAGAAAAG	GCAGCATAGTGAGCCCAGAANRG	GCAGCATAGTGAGCCCAGAANRG				0	0	0	0	46.7	0	0	0	CAGGGAGCTTAAGAGCCCAGAAAAGACAT	0.123417	0
RNA	1	chr7	77345294	-	3	GCAGCATAG-GAACCTAGAGTGG	GCAGCATAGGAACCTAGAGTGG	GCAGCATAGTGAGCCCAGAANRG	GCAGCATAGTGAGCCCAGAANRG				0	0	0	0	37.99	0	0	0	AGGGGCAGCATAGGAACCTAGAGTGGTAT	0.107575	0
RNA	1	chr7	19773586	-	3	GCTGGATAG-AAGCCCAGAAAGG	GCTGGATAGAAGCCCAGAAAGG	GCAGCATAGTGAGCCCAGAANRG	GCAGCATAGTGAGCCCAGAANRG				0	0	0	0	46.35	0	0	0	CTCCGCTGGATAGAAGCCCAGAAAGGAGC	0.124793	0
RNA	1	chr7	19555244	-	3	GCAGCATAG-GTGGTCAGAAGAG	GCAGCATAGGTGGTCAGAAGAG	GCAGCATAGTGAGCCCAGAANRG	GCAGCATAGTGAGCCCAGAANRG				0	0	0	0	43.39	0	0	0	GTACGCAGCATAGGTGGTCAGAAGAGAGA	0.0755399	0
RNA	1	chr7	4143137	-	2	GCAGCACAG-GGGCCCAGAACAG	GCAGCACAGGGGCCCAGAACAG	GCAGCATAGTGAGCCCAGAANRG	GCAGCATAGTGAGCCCAGAANRG				0	0	0	0	46.36	0	0	0	GGAAGCAGCACAGGGGCCCAGAACAGACA	0.234285	0
DNA	1	chr7	52459784	-	3	GCAGCCTCTGTGAGCCCAGAAGAG	GCAGCCTCTGTGAGCCCAGAAGAG	GCAGCA-TAGTGAGCCCAGAANRG	GCAGCATAGTGAGCCCAGAANRG				0	0	0	0	46.64	0	0	0	AGGCAGCCTCTGTGAGCCCAGAAGAGGGC	0.341516	0
DNA	1	chr7	53289086	-	3	GCAGAAGCAGGGAGCCCAGAATGG	GCAGAAGCAGGGAGCCCAGAATGG	GCAGCA-TAGTGAGCCCAGAANRG	GCAGCATAGTGAGCCCAGAANRG				0	0	0	0	46.31	0	0	0	GTGCAGAAGCAGGGAGCCCAGAATGGTGC	0.215683	0
DNA	1	chr7	145201700	-	3	ACAGAATAGAGAGCCCAGAAATAG	ACAGAATAGAGAGCCCAGAAATAG	GCAGCATAGTGAGCCCAGA-ANRG	GCAGCATAGTGAGCCCAGAANRG				0	0	0	0	40.89	0	0	0	GGACAGAATAGAGAGCCCAGAAATAGATC	0.118143	0
DNA	1	chr7	133085039	-	3	GCAGCATAGTGAGACCACAGCTAG	GCAGCATAGTGAGACCACAGCTAG	GCAGCATAGTGAGCCCAGA-ANRG	GCAGCATAGTGAGCCCAGAANRG				0	0	0	0	36.4	0	0	0	GGGCAGCATAGTGAGACCACAGCTAGGTG	0.158481	0
DNA	1	chr7	88863097	-	3	GTAGCATAGTGAGCACGGAGACAG	GTAGCATAGTGAGCACGGAGACAG	GCAGCATAGTGAGCCCAGA-ANRG	GCAGCATAGTGAGCCCAGAANRG				0	0	0	0	36.67	0	0	0	CTGTAGCATAGTGAGCACGGAGACAGTAG	0.135402	0
DNA	1	chr7	63601926	+	3	GCAGAATAGAAAGCCCAGAAATAG	GCAGAATAGAAAGCCCAGAAATAG	GCAGCATAGTGAGCCCAGA-ANRG	GCAGCATAGTGAGCCCAGAANRG				0	0	0	0	40.31	0	0	0	GGAGCAGAATAGAAAGCCCAGAAATAGAC	0.462886	0
DNA	1	chr7	56974998	-	3	GCAGAATAGAAAGCCCAGAAATAG	GCAGAATAGAAAGCCCAGAAATAG	GCAGCATAGTGAGCCCAGA-ANRG	GCAGCATAGTGAGCCCAGAANRG				0	0	0	0	40.31	0	0	0	GAGCAGAATAGAAAGCCCAGAAATAGACA	0.13007	0
DNA	1	chr7	49901831	+	3	ACAGAATAGAGAGCCCAGAAATAG	ACAGAATAGAGAGCCCAGAAATAG	GCAGCATAGTGAGCCCAGA-ANRG	GCAGCATAGTGAGCCCAGAANRG				0	0	0	0	40.89	0	0	0	GGAACAGAATAGAGAGCCCAGAAATAGAC	0.453381	0
DNA	1	chr7	36477661	-	2	GCAGAATAGAGAGCCCAGAAATAG	GCAGAATAGAGAGCCCAGAAATAG	GCAGCATAGTGAGCCCAGA-ANRG	GCAGCATAGTGAGCCCAGAANRG				0	0	0	0	41.01	0	0	0	GAGCAGAATAGAGAGCCCAGAAATAGAGC	0.294451	0
DNA	1	chr7	19625745	+	2	ACAGCATAGAGAGCCCAGAAATAG	ACAGCATAGAGAGCCCAGAAATAG	GCAGCATAGTGAGCCCAGA-ANRG	GCAGCATAGTGAGCCCAGAANRG				0	0	0	0	41.08	0	0	0	GGAACAGCATAGAGAGCCCAGAAATAGAC	0.731654	0
DNA	1	chr7	5258561	+	3	GCAGAATAGAAAGCCCAGAAATAG	GCAGAATAGAAAGCCCAGAAATAG	GCAGCATAGTGAGCCCAGA-ANRG	GCAGCATAGTGAGCCCAGAANRG				0	0	0	0	40.31	0	0	0	GGAGCAGAATAGAAAGCCCAGAAATAGAC	0.462886	0
DNA	1	chr7	2339838	+	3	ACAGAATAGAGAGCCCAGAAACGG	ACAGAATAGAGAGCCCAGAAACGG	GCAGCATAGTGAGCCCAGA-ANRG	GCAGCATAGTGAGCCCAGAANRG				0	0	0	0	40.89	0	0	0	AGAACAGAATAGAGAGCCCAGAAACGGAA	0.394709	0
DNA	1	chr7	11133363	+	3	ACAGAATAGAGAGCCCAGAGATAG	ACAGAATAGAGAGCCCAGAGATAG	GCAGCATAGTGAGCCCAGA-ANRG	GCAGCATAGTGAGCCCAGAANRG				0	0	0	0	40.89	0	0	0	GAAACAGAATAGAGAGCCCAGAGATAGAC	0.306084	0
RNA	1	chr7	138491307	-	3	GCAGCAAAGGGAGCC-AAAAAGG	GCAGCAAAGGGAGCCAAAAAGG	GCAGCATAGTGAGCCCAGAANRG	GCAGCATAGTGAGCCCAGAANRG				0	0	0	0	40.86	0	0	0	AAAGGCAGCAAAGGGAGCCAAAAAGGTAG	0.156987	0
RNA	1	chr7	138491307	-	3	GCAGCAAAGGGAGC-CAAAAAGG	GCAGCAAAGGGAGCCAAAAAGG	GCAGCATAGTGAGCCCAGAANRG	GCAGCATAGTGAGCCCAGAANRG				0	0	0	0	41.26	0	0	0	AAAGGCAGCAAAGGGAGCCAAAAAGGTAG	0.156987	0
RNA	1	chr7	138491307	-	3	GCAGCAAAGGGAG-CCAAAAAGG	GCAGCAAAGGGAGCCAAAAAGG	GCAGCATAGTGAGCCCAGAANRG	GCAGCATAGTGAGCCCAGAANRG				0	0	0	0	41.86	0	0	0	AAAGGCAGCAAAGGGAGCCAAAAAGGTAG	0.156987	0
RNA	1	chr7	128087819	+	3	GCAGCATATGCAGCC-AGAAAGG	GCAGCATATGCAGCCAGAAAGG	GCAGCATAGTGAGCCCAGAANRG	GCAGCATAGTGAGCCCAGAANRG				0	0	0	0	44.04	0	0	0	GAGGCAGCATATGCAGCCAGAAAGGAGAG	0.126261	0
RNA	1	chr7	128087819	+	3	GCAGCATATGCAGC-CAGAAAGG	GCAGCATATGCAGCCAGAAAGG	GCAGCATAGTGAGCCCAGAANRG	GCAGCATAGTGAGCCCAGAANRG				0	0	0	0	44.44	0	0	0	GAGGCAGCATATGCAGCCAGAAAGGAGAG	0.126261	0
RNA	1	chr7	123177817	-	3	ACAGTATAGTGAGCT-AGAAAGG	ACAGTATAGTGAGCTAGAAAGG	GCAGCATAGTGAGCCCAGAANRG	GCAGCATAGTGAGCCCAGAANRG				0	0	0	0	43.38	0	0	0	TTATACAGTATAGTGAGCTAGAAAGGTAA	0.124764	0
RNA	1	chr7	128087819	+	3	GCAGCATATGCAG-CCAGAAAGG	GCAGCATATGCAGCCAGAAAGG	GCAGCATAGTGAGCCCAGAANRG	GCAGCATAGTGAGCCCAGAANRG				0	0	0	0	45.04	0	0	0	GAGGCAGCATATGCAGCCAGAAAGGAGAG	0.126261	0
RNA	1	chr7	123177817	-	3	ACAGTATAGTGAGC-TAGAAAGG	ACAGTATAGTGAGCTAGAAAGG	GCAGCATAGTGAGCCCAGAANRG	GCAGCATAGTGAGCCCAGAANRG				0	0	0	0	43.38	0	0	0	TTATACAGTATAGTGAGCTAGAAAGGTAA	0.124764	0
RNA	1	chr7	123177817	-	3	ACAGTATAGTGAG-CTAGAAAGG	ACAGTATAGTGAGCTAGAAAGG	GCAGCATAGTGAGCCCAGAANRG	GCAGCATAGTGAGCCCAGAANRG				0	0	0	0	43.98	0	0	0	TTATACAGTATAGTGAGCTAGAAAGGTAA	0.124764	0
RNA	1	chr7	104529733	+	3	GTAGCATGGTGAGTC-AGAACAG	GTAGCATGGTGAGTCAGAACAG	GCAGCATAGTGAGCCCAGAANRG	GCAGCATAGTGAGCCCAGAANRG				0	0	0	0	43.89	0	0	0	AGAGTAGCATGGTGAGTCAGAACAGGGAT	0.17731	0
RNA	1	chr7	104529733	+	3	GTAGCATGGTGAGT-CAGAACAG	GTAGCATGGTGAGTCAGAACAG	GCAGCATAGTGAGCCCAGAANRG	GCAGCATAGTGAGCCCAGAANRG				0	0	0	0	44.29	0	0	0	AGAGTAGCATGGTGAGTCAGAACAGGGAT	0.17731	0
RNA	1	chr7	104529733	+	3	GTAGCATGGTGAG-TCAGAACAG	GTAGCATGGTGAGTCAGAACAG	GCAGCATAGTGAGCCCAGAANRG	GCAGCATAGTGAGCCCAGAANRG				0	0	0	0	44.29	0	0	0	AGAGTAGCATGGTGAGTCAGAACAGGGAT	0.17731	0
RNA	1	chr7	55288358	-	3	GCAGCCTCCTGAGCC-AGAATAG	GCAGCCTCCTGAGCCAGAATAG	GCAGCATAGTGAGCCCAGAANRG	GCAGCATAGTGAGCCCAGAANRG				0	0	0	0	44.76	0	0	0	TGGGGCAGCCTCCTGAGCCAGAATAGGCT	0.0692771	0
RNA	1	chr7	55288358	-	3	GCAGCCTCCTGAGC-CAGAATAG	GCAGCCTCCTGAGCCAGAATAG	GCAGCATAGTGAGCCCAGAANRG	GCAGCATAGTGAGCCCAGAANRG				0	0	0	0	45.16	0	0	0	TGGGGCAGCCTCCTGAGCCAGAATAGGCT	0.0692771	0
RNA	1	chr7	55288358	-	3	GCAGCCTCCTGAG-CCAGAATAG	GCAGCCTCCTGAGCCAGAATAG	GCAGCATAGTGAGCCCAGAANRG	GCAGCATAGTGAGCCCAGAANRG				0	0	0	0	45.76	0	0	0	TGGGGCAGCCTCCTGAGCCAGAATAGGCT	0.0692771	0
RNA	1	chr7	44727502	+	3	GGAGCATAGTGAGCA-AGGAGAG	GGAGCATAGTGAGCAAGGAGAG	GCAGCATAGTGAGCCCAGAANRG	GCAGCATAGTGAGCCCAGAANRG				0	0	0	0	38.56	0	0	0	GCTGGAGCATAGTGAGCAAGGAGAGGAAG	0.0805106	0
RNA	1	chr7	44727502	+	3	GGAGCATAGTGAGC-AAGGAGAG	GGAGCATAGTGAGCAAGGAGAG	GCAGCATAGTGAGCCCAGAANRG	GCAGCATAGTGAGCCCAGAANRG				0	0	0	0	38.56	0	0	0	GCTGGAGCATAGTGAGCAAGGAGAGGAAG	0.0805106	0
DNA	1	chr7	52459784	-	3	GCAGCCTCTGTGAGCCCAGAAGAG	GCAGCCTCTGTGAGCCCAGAAGAG	GCAGC-ATAGTGAGCCCAGAANRG	GCAGCATAGTGAGCCCAGAANRG				0	0	0	0	46.64	0	0	0	AGGCAGCCTCTGTGAGCCCAGAAGAGGGC	0.341516	0
RNA	1	chr7	44727502	+	3	GGAGCATAGTGAG-CAAGGAGAG	GGAGCATAGTGAGCAAGGAGAG	GCAGCATAGTGAGCCCAGAANRG	GCAGCATAGTGAGCCCAGAANRG				0	0	0	0	39.16	0	0	0	GCTGGAGCATAGTGAGCAAGGAGAGGAAG	0.0805106	0
RNA	1	chr7	43944534	-	3	GCAGCTG-GTGAGCACAGAAGGG	GCAGCTGGTGAGCACAGAAGGG	GCAGCATAGTGAGCCCAGAANRG	GCAGCATAGTGAGCCCAGAANRG				0	0	0	0	45.28	0	0	0	AGCTGCAGCTGGTGAGCACAGAAGGGGCT	0.249757	0
RNA	1	chr7	144471310	+	3	GAATCAT-GTGAGCCCAGGAGAG	GAATCATGTGAGCCCAGGAGAG	GCAGCATAGTGAGCCCAGAANRG	GCAGCATAGTGAGCCCAGAANRG				0	0	0	0	42.32	0	0	0	TCAGAATCATGTGAGCCCAGGAGAGACCA	0.104534	0
RNA	1	chr7	143520713	+	2	GCAGCAG-GTGAGTCCAGAAGAG	GCAGCAGGTGAGTCCAGAAGAG	GCAGCATAGTGAGCCCAGAANRG	GCAGCATAGTGAGCCCAGAANRG				0	0	0	0	46.09	0	0	0	ATTGCAGCAGGTGAGTCCAGAAGAGTGAT	0.231552	0
RNA	1	chr7	75228518	-	3	GCACCAT-CTGAGCCAAGAATGG	GCACCATCTGAGCCAAGAATGG	GCAGCATAGTGAGCCCAGAANRG	GCAGCATAGTGAGCCCAGAANRG				0	0	0	0	44.8	0	0	0	GGCAGCACCATCTGAGCCAAGAATGGGGT	0.102027	0
RNA	1	chr7	74973840	+	3	GCACCAT-CTGAGCCAAGAATGG	GCACCATCTGAGCCAAGAATGG	GCAGCATAGTGAGCCCAGAANRG	GCAGCATAGTGAGCCCAGAANRG				0	0	0	0	44.8	0	0	0	GCAGCACCATCTGAGCCAAGAATGGGGTG	0.135472	0
RNA	1	chr7	73164141	+	3	GCACCAT-CTGAGCCAAGAATGG	GCACCATCTGAGCCAAGAATGG	GCAGCATAGTGAGCCCAGAANRG	GCAGCATAGTGAGCCCAGAANRG				0	0	0	0	44.8	0	0	0	GCAGCACCATCTGAGCCAAGAATGGGGTG	0.135472	0
RNA	1	chr7	64792179	-	2	GCAGCCT-GTGGGCCCAGAATAG	GCAGCCTGTGGGCCCAGAATAG	GCAGCATAGTGAGCCCAGAANRG	GCAGCATAGTGAGCCCAGAANRG				0	0	0	0	46.61	0	0	0	TCAGGCAGCCTGTGGGCCCAGAATAGGCT	0.206408	0
RNA	1	chr7	128272354	-	3	GCAGAAAAGAG-GCCCAGAAGGG	GCAGAAAAGAGGCCCAGAAGGG	GCAGCATAGTGAGCCCAGAANRG	GCAGCATAGTGAGCCCAGAANRG				0	0	0	0	46.17	0	0	0	CTTGGCAGAAAAGAGGCCCAGAAGGGCAG	0.112997	0
RNA	1	chr7	4143137	-	2	GCAGCACAGGG-GCCCAGAACAG	GCAGCACAGGGGCCCAGAACAG	GCAGCATAGTGAGCCCAGAANRG	GCAGCATAGTGAGCCCAGAANRG				0	0	0	0	46.36	0	0	0	GGAAGCAGCACAGGGGCCCAGAACAGACA	0.234285	0
RNA	1	chr7	1044979	-	3	TCACCATAGTG-GCCCAGGAGAG	TCACCATAGTGGCCCAGGAGAG	GCAGCATAGTGAGCCCAGAANRG	GCAGCATAGTGAGCCCAGAANRG				0	0	0	0	41.8	0	0	0	GCAGTCACCATAGTGGCCCAGGAGAGCAG	0.0537172	0
DNA	1	chr7	134871264	+	3	GCAGTATACCTGAGCCCAGATGGG	GCAGTATACCTGAGCCCAGATGGG	GCAGCATA-GTGAGCCCAGAANRG	GCAGCATAGTGAGCCCAGAANRG				0	0	0	0	46.66	0	0	0	TATGCAGTATACCTGAGCCCAGATGGGAG	0.166217	0
DNA	1	chr7	52459784	-	2	GCAGCCTCTGTGAGCCCAGAAGAG	GCAGCCTCTGTGAGCCCAGAAGAG	GCAGCATA-GTGAGCCCAGAANRG	GCAGCATAGTGAGCCCAGAANRG				0	0	0	0	46.87	0	0	0	AGGCAGCCTCTGTGAGCCCAGAAGAGGGC	0.341516	0
DNA	1	chr7	4281384	+	3	GCACCATCTGTGAGCCAAGAAGGG	GCACCATCTGTGAGCCAAGAAGGG	GCAGCATA-GTGAGCCCAGAANRG	GCAGCATAGTGAGCCCAGAANRG				0	0	0	0	43.91	0	0	0	AAGGCACCATCTGTGAGCCAAGAAGGGGG	0.14181	0
RNA	1	chr7	122891700	+	3	GCA-AATATTTAGCCCAGAAGAG	GCAAATATTTAGCCCAGAAGAG	GCAGCATAGTGAGCCCAGAANRG	GCAGCATAGTGAGCCCAGAANRG				0	0	0	0	46.48	0	0	0	GAAGCAAATATTTAGCCCAGAAGAGAATG	0.131995	0
RNA	1	chr7	86981337	-	3	GCA-GTTAGTGAGCCCAGACTAG	GCAGTTAGTGAGCCCAGACTAG	GCAGCATAGTGAGCCCAGAANRG	GCAGCATAGTGAGCCCAGAANRG				0	0	0	0	41.32	0	0	0	AATGGCAGTTAGTGAGCCCAGACTAGTCT	0.246355	0
RNA	1	chr7	34099095	-	3	GCA-CATAGTGAGCACTCAAAAG	GCACATAGTGAGCACTCAAAAG	GCAGCATAGTGAGCCCAGAANRG	GCAGCATAGTGAGCCCAGAANRG				0	0	0	0	38.82	0	0	0	CCAGGCACATAGTGAGCACTCAAAAGTGT	0.068153	0
RNA	1	chr7	130477403	+	3	GCA-CAAAGTGACCCCACAAGAG	GCACAAAGTGACCCCACAAGAG	GCAGCATAGTGAGCCCAGAANRG	GCAGCATAGTGAGCCCAGAANRG				0	0	0	0	42.39	0	0	0	GGTGCACAAAGTGACCCCACAAGAGTTTC	0.125784	0
RNA	1	chr7	132973617	-	3	GCA-AATAGTGAAGCCAGAATAG	GCAAATAGTGAAGCCAGAATAG	GCAGCATAGTGAGCCCAGAANRG	GCAGCATAGTGAGCCCAGAANRG				0	0	0	0	45.13	0	0	0	ATGGGCAAATAGTGAAGCCAGAATAGAGG	0.0982784	0
RNA	1	chr7	149252669	-	3	GCA-CAGTGTGAGCCCAGGAGAG	GCACAGTGTGAGCCCAGGAGAG	GCAGCATAGTGAGCCCAGAANRG	GCAGCATAGTGAGCCCAGAANRG				0	0	0	0	42.22	0	0	0	AACAGCACAGTGTGAGCCCAGGAGAGAGT	0.070327	0
RNA	1	chr7	154954288	-	3	GCA-CATAGTGACGCCAGAGTGG	GCACATAGTGACGCCAGAGTGG	GCAGCATAGTGAGCCCAGAANRG	GCAGCATAGTGAGCCCAGAANRG				0	0	0	0	39.32	0	0	0	TGAAGCACATAGTGACGCCAGAGTGGCTG	0.129112	0
DNA	1	chr7	53289086	-	3	GCAGAAGCAGGGAGCCCAGAATGG	GCAGAAGCAGGGAGCCCAGAATGG	GCAGCAT-AGTGAGCCCAGAANRG	GCAGCATAGTGAGCCCAGAANRG				0	0	0	0	46.31	0	0	0	GTGCAGAAGCAGGGAGCCCAGAATGGTGC	0.215683	0
DNA	1	chr7	52459784	-	2	GCAGCCTCTGTGAGCCCAGAAGAG	GCAGCCTCTGTGAGCCCAGAAGAG	GCAGCAT-AGTGAGCCCAGAANRG	GCAGCATAGTGAGCCCAGAANRG				0	0	0	0	46.87	0	0	0	AGGCAGCCTCTGTGAGCCCAGAAGAGGGC	0.341516	0
DNA	1	chr7	23217605	+	3	GCAGCATCAGTGAGTTCAGGAAAG	GCAGCATCAGTGAGTTCAGGAAAG	GCAGCAT-AGTGAGCCCAGAANRG	GCAGCATAGTGAGCCCAGAANRG				0	0	0	0	37.23	0	0	0	TCTGCAGCATCAGTGAGTTCAGGAAAGCA	0.136043	0
DNA	1	chr7	4281384	+	3	GCACCATCTGTGAGCCAAGAAGGG	GCACCATCTGTGAGCCAAGAAGGG	GCAGCAT-AGTGAGCCCAGAANRG	GCAGCATAGTGAGCCCAGAANRG				0	0	0	0	43.91	0	0	0	AAGGCACCATCTGTGAGCCAAGAAGGGGG	0.14181	0
DNA	1	chr7	78436353	+	3	TCAGACATAGAGAGCCCTGAAGAG	TCAGACATAGAGAGCCCTGAAGAG	GCAG-CATAGTGAGCCCAGAANRG	GCAGCATAGTGAGCCCAGAANRG				0	0	0	0	42.69	0	0	0	AAATCAGACATAGAGAGCCCTGAAGAGAA	0.10175	0
DNA	1	chr7	47719233	+	3	GCAGTCATAGTGATCACCGAAAGG	GCAGTCATAGTGATCACCGAAAGG	GCAG-CATAGTGAGCCCAGAANRG	GCAGCATAGTGAGCCCAGAANRG				0	0	0	0	39.91	0	0	0	CCAGCAGTCATAGTGATCACCGAAAGGTC	0.0809019	0
DNA	1	chr7	52459784	-	3	GCAGCCTCTGTGAGCCCAGAAGAG	GCAGCCTCTGTGAGCCCAGAAGAG	GCAG-CATAGTGAGCCCAGAANRG	GCAGCATAGTGAGCCCAGAANRG				0	0	0	0	46.66	0	0	0	AGGCAGCCTCTGTGAGCCCAGAAGAGGGC	0.341516	0
DNA	1	chr7	107714461	+	3	ACCAGCTTAGTGAGCCCAGGAAAG	ACCAGCTTAGTGAGCCCAGGAAAG	GC-AGCATAGTGAGCCCAGAANRG	GCAGCATAGTGAGCCCAGAANRG				0	0	0	0	41.2	0	0	0	CCCACCAGCTTAGTGAGCCCAGGAAAGTC	0.0926014	0
DNA	1	chr3	63372767	+	3	GCTGCAAAGTGCAGCCCAGAAGAG	GCTGCAAAGTGCAGCCCAGAAGAG	GCAGCATAGT-GAGCCCAGAANRG	GCAGCATAGTGAGCCCAGAANRG				0	0	0	0	45.82	0	0	0	AGGGCTGCAAAGTGCAGCCCAGAAGAGTC	0.132347	0
DNA	1	chr3	197548197	+	3	GCAGCAGAATGGAGCCCAGACTGG	GCAGCAGAATGGAGCCCAGACTGG	GCAGCATAGT-GAGCCCAGAANRG	GCAGCATAGTGAGCCCAGAANRG				0	0	0	0	46.42	0	0	0	AGAGCAGCAGAATGGAGCCCAGACTGGCT	0.155038	0
DNA	1	chr3	158235138	-	3	GCATCATAGTGACACTCAGAATGG	GCATCATAGTGACACTCAGAATGG	GCAGCATAGTGAGCC-CAGAANRG	GCAGCATAGTGAGCCCAGAANRG				0	0	0	0	42.83	0	0	0	ATGCATCATAGTGACACTCAGAATGGAAA	0.240934	0
DNA	1	chr3	88180958	-	3	GCACTATAGTGAGACTCAGAAGGG	GCACTATAGTGAGACTCAGAAGGG	GCAGCATAGTGAGCC-CAGAANRG	GCAGCATAGTGAGCCCAGAANRG				0	0	0	0	43.74	0	0	0	ATGCACTATAGTGAGACTCAGAAGGGATG	0.243649	0
DNA	1	chr3	132306916	-	3	TCAGCAGAGTGTGCCCAGGAAAGG	TCAGCAGAGTGTGCCCAGGAAAGG	GCAGCATAGTGAGCCCA-GAANRG	GCAGCATAGTGAGCCCAGAANRG				0	0	0	0	42.55	0	0	0	ATTCAGCAGAGTGTGCCCAGGAAAGGTCC	0.144031	0
DNA	1	chr3	107867424	+	3	GCTGTATAGTGAGTCCAAGAAAAG	GCTGTATAGTGAGTCCAAGAAAAG	GCAGCATAGTGAGCCCA-GAANRG	GCAGCATAGTGAGCCCAGAANRG				0	0	0	0	42.06	0	0	0	TCAGCTGTATAGTGAGTCCAAGAAAAGTC	0.0599935	0
DNA	1	chr3	60297628	-	3	CCAGCACAGTGAGCCAAGGAAAGG	CCAGCACAGTGAGCCAAGGAAAGG	GCAGCATAGTGAGCCCA-GAANRG	GCAGCATAGTGAGCCCAGAANRG				0	0	0	0	41.05	0	0	0	TGCCAGCACAGTGAGCCAAGGAAAGGAAA	0.215438	0
DNA	1	chr3	46782293	+	3	GCAGAATAGTAAGCCCAGAAATAG	GCAGAATAGTAAGCCCAGAAATAG	GCAGCATAGTGAGCCCA-GAANRG	GCAGCATAGTGAGCCCAGAANRG				0	0	0	0	37.81	0	0	0	AAAGCAGAATAGTAAGCCCAGAAATAGAC	0.733888	0
DNA	1	chr3	46357811	-	3	GCAGCAGAGTGAGCCCACAATGGG	GCAGCAGAGTGAGCCCACAATGGG	GCAGCATAGTGAGCCCA-GAANRG	GCAGCATAGTGAGCCCAGAANRG				0	0	0	0	38.47	0	0	0	TTGCAGCAGAGTGAGCCCACAATGGGAGA	0.418973	0
DNA	1	chr3	46373150	-	2	GCAGCATAGTGAGCCCAGAAGGGG	GCAGCATAGTGAGCCCAGAAGGGG	GCAGCATAGTGAGCCCA-GAANRG	GCAGCATAGTGAGCCCAGAANRG				0	0	0	0	38.7	0	0	0	CGGCAGCATAGTGAGCCCAGAAGGGGACA	0.710145	0
DNA	1	chr3	195143339	-	3	GCACCAGACTGAGCCCAAGAATGG	GCACCAGACTGAGCCCAAGAATGG	GCAGCATAGTGAGCCCA-GAANRG	GCAGCATAGTGAGCCCAGAANRG				0	0	0	0	42.95	0	0	0	GTGCACCAGACTGAGCCCAAGAATGGCCA	0.159635	0
RNA	1	chr3	2020770	+	3	GCAGCCTAGTGAGACAAG-AAAG	GCAGCCTAGTGAGACAAGAAAG	GCAGCATAGTGAGCCCAGAANRG	GCAGCATAGTGAGCCCAGAANRG				0	0	0	0	39.08	0	0	0	AATGCAGCCTAGTGAGACAAGAAAGTAGT	0.445448	0
RNA	1	chr3	14166006	-	3	GCAGCCCAGTGAGCCCAG-TGGG	GCAGCCCAGTGAGCCCAGTGGG	GCAGCATAGTGAGCCCAGAANRG	GCAGCATAGTGAGCCCAGAANRG				0	0	0	0	36.45	0	0	0	GAGAGCAGCCCAGTGAGCCCAGTGGGGTG	0.1582	0
RNA	1	chr3	168426187	+	3	GCACCCTAGTGAGTCCAG-AAGG	GCACCCTAGTGAGTCCAGAAGG	GCAGCATAGTGAGCCCAGAANRG	GCAGCATAGTGAGCCCAGAANRG				0	0	0	0	41.21	0	0	0	CCAGCACCCTAGTGAGTCCAGAAGGCAGA	0.465352	0
RNA	1	chr3	155721039	-	3	GCAGAATAGAGAACCCAG-AAAG	GCAGAATAGAGAACCCAGAAAG	GCAGCATAGTGAGCCCAGAANRG	GCAGCATAGTGAGCCCAGAANRG				0	0	0	0	41.1	0	0	0	TGGAGCAGAATAGAGAACCCAGAAAGAAA	0.0675607	0
RNA	1	chr3	147437072	-	3	GGAGGATTGTGAGCCCAG-AAGG	GGAGGATTGTGAGCCCAGAAGG	GCAGCATAGTGAGCCCAGAANRG	GCAGCATAGTGAGCCCAGAANRG				0	0	0	0	42.3	0	0	0	GGTGGGAGGATTGTGAGCCCAGAAGGTCA	0.069232	0
RNA	1	chr3	9243946	-	3	GCAGGAATGTGAGCCCAG-AAAG	GCAGGAATGTGAGCCCAGAAAG	GCAGCATAGTGAGCCCAGAANRG	GCAGCATAGTGAGCCCAGAANRG				0	0	0	0	42.2	0	0	0	CTAGGCAGGAATGTGAGCCCAGAAAGGTC	0.0512198	0
RNA	1	chr3	135732506	+	3	GCACCACACTGAGCCCAG-ACAG	GCACCACACTGAGCCCAGACAG	GCAGCATAGTGAGCCCAGAANRG	GCAGCATAGTGAGCCCAGAANRG				0	0	0	0	42.14	0	0	0	CTGGCACCACACTGAGCCCAGACAGGCTG	0.353208	0
RNA	1	chr3	130102977	+	3	GCAGCAGGGTGAGGCCAG-AGAG	GCAGCAGGGTGAGGCCAGAGAG	GCAGCATAGTGAGCCCAGAANRG	GCAGCATAGTGAGCCCAGAANRG				0	0	0	0	41.09	0	0	0	TCAGCAGCAGGGTGAGGCCAGAGAGGCAG	0.36944	0
RNA	1	chr3	95071389	+	3	ACAGAATAGAGAGCCCAG-AGAG	ACAGAATAGAGAGCCCAGAGAG	GCAGCATAGTGAGCCCAGAANRG	GCAGCATAGTGAGCCCAGAANRG				0	0	0	0	42.08	0	0	0	GGAACAGAATAGAGAGCCCAGAGAGAAAA	0.291783	0
RNA	1	chr3	46373152	-	0	GCAGCATAGTGAGCCCAG-AAGG	GCAGCATAGTGAGCCCAGAAGG	GCAGCATAGTGAGCCCAGAANRG	GCAGCATAGTGAGCCCAGAANRG				0	0	0	0	42.89	0	0	0	GGCGGCAGCATAGTGAGCCCAGAAGGGGA	0.514849	0
RNA	1	chr3	45926029	+	3	GCAGGATAGTGATCCCTG-AGAG	GCAGGATAGTGATCCCTGAGAG	GCAGCATAGTGAGCCCAGAANRG	GCAGCATAGTGAGCCCAGAANRG				0	0	0	0	38.6	0	0	0	AATGCAGGATAGTGATCCCTGAGAGACAG	0.259685	0
RNA	1	chr3	35532061	+	3	ACAGAATAGAGAGCCCAG-AAAG	ACAGAATAGAGAGCCCAGAAAG	GCAGCATAGTGAGCCCAGAANRG	GCAGCATAGTGAGCCCAGAANRG				0	0	0	0	42.08	0	0	0	TGAACAGAATAGAGAGCCCAGAAAGAGAC	0.424347	0
RNA	1	chr3	29756878	-	3	GGAGGGTAGTGAGCCCAG-AGAG	GGAGGGTAGTGAGCCCAGAGAG	GCAGCATAGTGAGCCCAGAANRG	GCAGCATAGTGAGCCCAGAANRG				0	0	0	0	42.36	0	0	0	GCCAGGAGGGTAGTGAGCCCAGAGAGGCT	0.0627889	0
RNA	1	chr3	18028920	+	3	GGAGCATAGTGAGCAAAG-AAGG	GGAGCATAGTGAGCAAAGAAGG	GCAGCATAGTGAGCCCAGAANRG	GCAGCATAGTGAGCCCAGAANRG				0	0	0	0	38.56	0	0	0	ACAGGAGCATAGTGAGCAAAGAAGGAGGC	0.410992	0
RNA	1	chr3	15990525	-	3	ACAGAATAGAGAGCCCAG-AAAG	ACAGAATAGAGAGCCCAGAAAG	GCAGCATAGTGAGCCCAGAANRG	GCAGCATAGTGAGCCCAGAANRG				0	0	0	0	42.08	0	0	0	TGGAACAGAATAGAGAGCCCAGAAAGACT	0.0686386	0
RNA	1	chr3	15440658	+	2	TCATCATAGTGAGCCCAG-AGAG	TCATCATAGTGAGCCCAGAGAG	GCAGCATAGTGAGCCCAGAANRG	GCAGCATAGTGAGCCCAGAANRG				0	0	0	0	42.6	0	0	0	TCATCATCATAGTGAGCCCAGAGAGCCAC	0.474712	0
RNA	1	chr3	14290209	-	3	GGAGTAGAGTGAGCCCAG-AGAG	GGAGTAGAGTGAGCCCAGAGAG	GCAGCATAGTGAGCCCAGAANRG	GCAGCATAGTGAGCCCAGAANRG				0	0	0	0	42.34	0	0	0	GGAAGGAGTAGAGTGAGCCCAGAGAGTGT	0.0574206	0
RNA	1	chr3	134475576	-	3	GCAGCAGAGTGAGGCCAA-ATGG	GCAGCAGAGTGAGGCCAAATGG	GCAGCATAGTGAGCCCAGAANRG	GCAGCATAGTGAGCCCAGAANRG				0	0	0	0	37.36	0	0	0	CAGTGCAGCAGAGTGAGGCCAAATGGACT	0.228291	0
RNA	1	chr7	143520713	+	3	GCAGCAGG-TGAGTCCAGAAGAG	GCAGCAGGTGAGTCCAGAAGAG	GCAGCATAGTGAGCCCAGAANRG	GCAGCATAGTGAGCCCAGAANRG				0	0	0	0	45.74	0	0	0	ATTGCAGCAGGTGAGTCCAGAAGAGTGAT	0.231552	0
RNA	1	chr7	128087819	+	3	GCAGCATA-TGCAGCCAGAAAGG	GCAGCATATGCAGCCAGAAAGG	GCAGCATAGTGAGCCCAGAANRG	GCAGCATAGTGAGCCCAGAANRG				0	0	0	0	44.34	0	0	0	GAGGCAGCATATGCAGCCAGAAAGGAGAG	0.126261	0
RNA	1	chr7	101915223	-	3	GCAGCAGA-TGGCCCCAGAATGG	GCAGCAGATGGCCCCAGAATGG	GCAGCATAGTGAGCCCAGAANRG	GCAGCATAGTGAGCCCAGAANRG				0	0	0	0	45.41	0	0	0	GCCTGCAGCAGATGGCCCCAGAATGGTGT	0.0903808	0
RNA	1	chr7	82969093	+	3	ACAGCATA-TGAGGCCACAATGG	ACAGCATATGAGGCCACAATGG	GCAGCATAGTGAGCCCAGAANRG	GCAGCATAGTGAGCCCAGAANRG				0	0	0	0	42.12	0	0	0	TTTACAGCATATGAGGCCACAATGGTACA	0.12969	0
RNA	1	chr7	78542414	+	3	GGAGCTTA-AGAGCCCAGAAAAG	GGAGCTTAAGAGCCCAGAAAAG	GCAGCATAGTGAGCCCAGAANRG	GCAGCATAGTGAGCCCAGAANRG				0	0	0	0	46.7	0	0	0	CAGGGAGCTTAAGAGCCCAGAAAAGACAT	0.123417	0
RNA	1	chr7	75228518	-	3	GCACCATC-TGAGCCAAGAATGG	GCACCATCTGAGCCAAGAATGG	GCAGCATAGTGAGCCCAGAANRG	GCAGCATAGTGAGCCCAGAANRG				0	0	0	0	44.8	0	0	0	GGCAGCACCATCTGAGCCAAGAATGGGGT	0.102027	0
RNA	1	chr7	74973840	+	3	GCACCATC-TGAGCCAAGAATGG	GCACCATCTGAGCCAAGAATGG	GCAGCATAGTGAGCCCAGAANRG	GCAGCATAGTGAGCCCAGAANRG				0	0	0	0	44.8	0	0	0	GCAGCACCATCTGAGCCAAGAATGGGGTG	0.135472	0
RNA	1	chr7	73164141	+	3	GCACCATC-TGAGCCAAGAATGG	GCACCATCTGAGCCAAGAATGG	GCAGCATAGTGAGCCCAGAANRG	GCAGCATAGTGAGCCCAGAANRG				0	0	0	0	44.8	0	0	0	GCAGCACCATCTGAGCCAAGAATGGGGTG	0.135472	0
RNA	1	chr7	64792179	-	3	GCAGCCTG-TGGGCCCAGAATAG	GCAGCCTGTGGGCCCAGAATAG	GCAGCATAGTGAGCCCAGAANRG	GCAGCATAGTGAGCCCAGAANRG				0	0	0	0	46.26	0	0	0	TCAGGCAGCCTGTGGGCCCAGAATAGGCT	0.206408	0
RNA	1	chr7	41983090	-	3	GCAGCCTA-TGAGCTAAGAATGG	GCAGCCTATGAGCTAAGAATGG	GCAGCATAGTGAGCCCAGAANRG	GCAGCATAGTGAGCCCAGAANRG				0	0	0	0	43.13	0	0	0	CTGTGCAGCCTATGAGCTAAGAATGGTTT	0.0889703	0
RNA	1	chr7	4143137	-	3	GCAGCACA-GGGGCCCAGAACAG	GCAGCACAGGGGCCCAGAACAG	GCAGCATAGTGAGCCCAGAANRG	GCAGCATAGTGAGCCCAGAANRG				0	0	0	0	46.01	0	0	0	GGAAGCAGCACAGGGGCCCAGAACAGACA	0.234285	0
RNA	1	chr7	101592617	+	3	GCAGCAGAGA-AGCCCAGACAGG	GCAGCAGAGAAGCCCAGACAGG	GCAGCATAGTGAGCCCAGAANRG	GCAGCATAGTGAGCCCAGAANRG				0	0	0	0	40.46	0	0	0	GTGGCAGCAGAGAAGCCCAGACAGGAGCT	0.159572	0
RNA	1	chr7	19773586	-	3	GCTGGATAGA-AGCCCAGAAAGG	GCTGGATAGAAGCCCAGAAAGG	GCAGCATAGTGAGCCCAGAANRG	GCAGCATAGTGAGCCCAGAANRG				0	0	0	0	46.35	0	0	0	CTCCGCTGGATAGAAGCCCAGAAAGGAGC	0.124793	0
RNA	1	chr7	4143137	-	3	GCAGCACAGG-GGCCCAGAACAG	GCAGCACAGGGGCCCAGAACAG	GCAGCATAGTGAGCCCAGAANRG	GCAGCATAGTGAGCCCAGAANRG				0	0	0	0	45.66	0	0	0	GGAAGCAGCACAGGGGCCCAGAACAGACA	0.234285	0
RNA	1	chr7	151609489	+	3	GCAGGATAGTGA-CTCAAAATGG	GCAGGATAGTGACTCAAAATGG	GCAGCATAGTGAGCCCAGAANRG	GCAGCATAGTGAGCCCAGAANRG				0	0	0	0	40.7	0	0	0	AGAGCAGGATAGTGACTCAAAATGGATTT	0.122462	0
RNA	1	chr7	6920080	+	3	GCAGCATGGTGA-CTCAAAACAG	GCAGCATGGTGACTCAAAACAG	GCAGCATAGTGAGCCCAGAANRG	GCAGCATAGTGAGCCCAGAANRG				0	0	0	0	40.62	0	0	0	GGGGCAGCATGGTGACTCAAAACAGGAGC	0.131906	0
RNA	1	chr7	4143137	-	3	GCAGCACAGGGG-CCCAGAACAG	GCAGCACAGGGGCCCAGAACAG	GCAGCATAGTGAGCCCAGAANRG	GCAGCATAGTGAGCCCAGAANRG				0	0	0	0	45.26	0	0	0	GGAAGCAGCACAGGGGCCCAGAACAGACA	0.234285	0
RNA	1	chr7	4201266	+	3	GCTGCAGAGTCA-CCCAGAATGG	GCTGCAGAGTCACCCAGAATGG	GCAGCATAGTGAGCCCAGAANRG	GCAGCATAGTGAGCCCAGAANRG				0	0	0	0	45.71	0	0	0	CGAGCTGCAGAGTCACCCAGAATGGAGCC	0.10555	0
DNA	1	chr7	16902128	-	3	GCATCATACTAAGACCCAGAAAAG	GCATCATACTAAGACCCAGAAAAG	GCAGCATAGTGAG-CCCAGAANRG	GCAGCATAGTGAGCCCAGAANRG				0	0	0	0	45.18	0	0	0	ATGCATCATACTAAGACCCAGAAAAGTAT	0.115348	0
DNA	1	chr3	158235138	-	3	GCATCATAGTGACACTCAGAATGG	GCATCATAGTGACACTCAGAATGG	GCAGCATAGTGA-GCCCAGAANRG	GCAGCATAGTGAGCCCAGAANRG				0	0	0	0	42.83	0	0	0	ATGCATCATAGTGACACTCAGAATGGAAA	0.240934	0
DNA	1	chr3	63372767	+	3	GCTGCAAAGTGCAGCCCAGAAGAG	GCTGCAAAGTGCAGCCCAGAAGAG	GCAGCATAGTGA-GCCCAGAANRG	GCAGCATAGTGAGCCCAGAANRG				0	0	0	0	45.42	0	0	0	AGGGCTGCAAAGTGCAGCCCAGAAGAGTC	0.132347	0
DNA	1	chr3	13122694	-	3	GCAGCAAAGTGAAGCCAATAACAG	GCAGCAAAGTGAAGCCAATAACAG	GCAGCATAGTGA-GCCCAGAANRG	GCAGCATAGTGAGCCCAGAANRG				0	0	0	0	38.37	0	0	0	TGGCAGCAAAGTGAAGCCAATAACAGAGA	0.0952239	0
DNA	1	chr3	2722871	-	3	GCAGCATATTGATGTACAGAAGGG	GCAGCATATTGATGTACAGAAGGG	GCAGCATAGTGA-GCCCAGAANRG	GCAGCATAGTGAGCCCAGAANRG				0	0	0	0	42.05	0	0	0	TAGCAGCATATTGATGTACAGAAGGGATA	0.200936	0
DNA	1	chr3	149693645	+	3	GACAGAATAGAGAACCCAGAATAG	GACAGAATAGAGAACCCAGAATAG	G-CAGCATAGTGAGCCCAGAANRG	GCAGCATAGTGAGCCCAGAANRG				0	0	0	0	45.36	0	0	0	TGGGACAGAATAGAGAACCCAGAATAGAG	0.120955	0
DNA	1	chr3	72089798	+	3	GGCAGCATAGGGAGACCAAAAAAG	GGCAGCATAGGGAGACCAAAAAAG	G-CAGCATAGTGAGCCCAGAANRG	GCAGCATAGTGAGCCCAGAANRG				0	0	0	0	39.97	0	0	0	CTGGGCAGCATAGGGAGACCAAAAAAGAA	0.169311	0
DNA	1	chr3	60297629	-	3	GCCAGCACAGTGAGCCAAGGAAAG	GCCAGCACAGTGAGCCAAGGAAAG	G-CAGCATAGTGAGCCCAGAANRG	GCAGCATAGTGAGCCCAGAANRG				0	0	0	0	38.3	0	0	0	TTGCCAGCACAGTGAGCCAAGGAAAGGAA	0.162196	0
DNA	1	chr3	46373151	-	0	GGCAGCATAGTGAGCCCAGAAGGG	GGCAGCATAGTGAGCCCAGAAGGG	G-CAGCATAGTGAGCCCAGAANRG	GCAGCATAGTGAGCCCAGAANRG				0	0	0	0	47.57	0	0	0	GCGGCAGCATAGTGAGCCCAGAAGGGGAC	0.943055	0
DNA	1	chr3	46357812	-	3	TGCAGCAGAGTGAGCCCACAATGG	TGCAGCAGAGTGAGCCCACAATGG	G-CAGCATAGTGAGCCCAGAANRG	GCAGCATAGTGAGCCCAGAANRG				0	0	0	0	42.18	0	0	0	TTTGCAGCAGAGTGAGCCCACAATGGGAG	0.726654	0
DNA	1	chr3	9243945	-	3	GGCAGGAATGTGAGCCCAGAAAGG	GGCAGGAATGTGAGCCCAGAAAGG	G-CAGCATAGTGAGCCCAGAANRG	GCAGCATAGTGAGCCCAGAANRG				0	0	0	0	46.74	0	0	0	TAGGCAGGAATGTGAGCCCAGAAAGGTCA	0.484284	0
DNA	1	chr3	6298369	-	3	AACAGAATAGAGAGCCCAGAATAG	AACAGAATAGAGAGCCCAGAATAG	G-CAGCATAGTGAGCCCAGAANRG	GCAGCATAGTGAGCCCAGAANRG				0	0	0	0	46.54	0	0	0	GGAACAGAATAGAGAGCCCAGAATAGTCA	0.336099	0
DNA	1	chr3	46373151	-	2	GGCAGCATAGTGAGCCCAGAAGGG	GGCAGCATAGTGAGCCCAGAAGGG	GCA-GCATAGTGAGCCCAGAANRG	GCAGCATAGTGAGCCCAGAANRG				0	0	0	0	47.25	0	0	0	GCGGCAGCATAGTGAGCCCAGAAGGGGAC	0.943055	0
DNA	1	chr17	35149183	+	3	GCTGCAATATTTAGCCCAGAAAAG	GCTGCAATATTTAGCCCAGAAAAG	GCAGC-ATAGTGAGCCCAGAANRG	GCAGCATAGTGAGCCCAGAANRG				0	0	0	0	46.04	0	0	0	GAAGCTGCAATATTTAGCCCAGAAAAGGC	0.0893276	0
DNA	1	chr17	9278668	+	3	GCAGTATAATGGAGCTCAGAAGAG	GCAGTATAATGGAGCTCAGAAGAG	GCAGCATAGTG-AGCCCAGAANRG	GCAGCATAGTGAGCCCAGAANRG				0	0	0	0	44.06	0	0	0	TATGCAGTATAATGGAGCTCAGAAGAGAG	0.143802	0
DNA	1	chr17	32147928	-	3	GCATCAGAAGTGGGCCCAGAAAAG	GCATCAGAAGTGGGCCCAGAAAAG	GCAGCATA-GTGAGCCCAGAANRG	GCAGCATAGTGAGCCCAGAANRG				0	0	0	0	45.85	0	0	0	ACGCATCAGAAGTGGGCCCAGAAAAGATG	0.129338	0
DNA	1	chr17	73854571	+	3	GCAACATAGTGAGACCAGGCATGG	GCAACATAGTGAGACCAGGCATGG	GCAGCATAGTGAGCCCA-GAANRG	GCAGCATAGTGAGCCCAGAANRG				0	0	0	0	36.23	0	0	0	TGGGCAACATAGTGAGACCAGGCATGGTG	0.391961	0
DNA	1	chr17	41404431	-	3	CCAGCATAGGAAGCCCAAGAAGGG	CCAGCATAGGAAGCCCAAGAAGGG	GCAGCATAGTGAGCCCA-GAANRG	GCAGCATAGTGAGCCCAGAANRG				0	0	0	0	42.38	0	0	0	TTCCAGCATAGGAAGCCCAAGAAGGGTCA	0.222195	0
DNA	1	chr17	41404431	-	3	CCAGCATAGGAAGCCCAAGAAGGG	CCAGCATAGGAAGCCCAAGAAGGG	GCAGCATAGTGAGCCC-AGAANRG	GCAGCATAGTGAGCCCAGAANRG				0	0	0	0	43.38	0	0	0	TTCCAGCATAGGAAGCCCAAGAAGGGTCA	0.222195	0
DNA	1	chr17	74143105	+	3	GTAGAATAGTGAGTCCAGAAATAG	GTAGAATAGTGAGTCCAGAAATAG	GCAGCATAGTGAGCCCAGA-ANRG	GCAGCATAGTGAGCCCAGAANRG				0	0	0	0	40.08	0	0	0	GCAGTAGAATAGTGAGTCCAGAAATAGAC	0.546809	0
DNA	1	chr17	73854571	+	3	GCAACATAGTGAGACCAGGCATGG	GCAACATAGTGAGACCAGGCATGG	GCAGCATAGTGAGCCCAGA-ANRG	GCAGCATAGTGAGCCCAGAANRG				0	0	0	0	35.23	0	0	0	TGGGCAACATAGTGAGACCAGGCATGGTG	0.391961	0
DNA	1	chr17	60057934	-	3	ACAGAATAGAGAGCCCAGAAATAG	ACAGAATAGAGAGCCCAGAAATAG	GCAGCATAGTGAGCCCAGA-ANRG	GCAGCATAGTGAGCCCAGAANRG				0	0	0	0	40.89	0	0	0	GAACAGAATAGAGAGCCCAGAAATAGACC	0.117788	0
DNA	1	chr17	21158852	+	3	ACAGAATAGAGAGCCCAGAAATAG	ACAGAATAGAGAGCCCAGAAATAG	GCAGCATAGTGAGCCCAGA-ANRG	GCAGCATAGTGAGCCCAGAANRG				0	0	0	0	40.89	0	0	0	GGAACAGAATAGAGAGCCCAGAAATAGAC	0.453381	0
DNA	1	chr17	5964569	-	3	ACAGAATAGAGAGCCCAGAAATAG	ACAGAATAGAGAGCCCAGAAATAG	GCAGCATAGTGAGCCCAGA-ANRG	GCAGCATAGTGAGCCCAGAANRG				0	0	0	0	40.89	0	0	0	GAACAGAATAGAGAGCCCAGAAATAGACC	0.117788	0
DNA	1	chr17	40484889	-	3	GAAGCACGAGTGACCCCAGAATAG	GAAGCACGAGTGACCCCAGAATAG	GCAGCA-TAGTGAGCCCAGAANRG	GCAGCATAGTGAGCCCAGAANRG				0	0	0	0	45.77	0	0	0	AGGAAGCACGAGTGACCCCAGAATAGGGT	0.101736	0
DNA	1	chr17	35149183	+	3	GCTGCAATATTTAGCCCAGAAAAG	GCTGCAATATTTAGCCCAGAAAAG	GCAGCA-TAGTGAGCCCAGAANRG	GCAGCATAGTGAGCCCAGAANRG				0	0	0	0	46.02	0	0	0	GAAGCTGCAATATTTAGCCCAGAAAAGGC	0.0893276	0
DNA	1	chr17	32147928	-	3	GCATCAGAAGTGGGCCCAGAAAAG	GCATCAGAAGTGGGCCCAGAAAAG	GCAGCA-TAGTGAGCCCAGAANRG	GCAGCATAGTGAGCCCAGAANRG				0	0	0	0	45.93	0	0	0	ACGCATCAGAAGTGGGCCCAGAAAAGATG	0.129338	0
DNA	1	chr10	128471289	+	3	CCAGCATCCTGAGACCCAGAAGGG	CCAGCATCCTGAGACCCAGAAGGG	GCAGCATAGTGAG-CCCAGAANRG	GCAGCATAGTGAGCCCAGAANRG				0	0	0	0	45.66	0	0	0	AAGCCAGCATCCTGAGACCCAGAAGGGAC	0.141043	0
DNA	1	chr10	47015010	+	3	GCAGCCAAGTGAAACCCAGAATGG	GCAGCCAAGTGAAACCCAGAATGG	GCAGCATAGTGAG-CCCAGAANRG	GCAGCATAGTGAGCCCAGAANRG				0	0	0	0	44.86	0	0	0	AAAGCAGCCAAGTGAAACCCAGAATGGGT	0.129361	0
DNA	1	chr10	1247612	+	3	GCAGCATAGTGAGGTGGAGAACAG	GCAGCATAGTGAGGTGGAGAACAG	GCAGCATAGTGAG-CCCAGAANRG	GCAGCATAGTGAGCCCAGAANRG				0	0	0	0	39.2	0	0	0	CAGGCAGCATAGTGAGGTGGAGAACAGAG	0.134265	0
RNA	1	chr10	102110547	-	2	GCAGCATGGTGA-CCCAGCATGG	GCAGCATGGTGACCCAGCATGG	GCAGCATAGTGAGCCCAGAANRG	GCAGCATAGTGAGCCCAGAANRG				0	0	0	0	41.52	0	0	0	CAGGGCAGCATGGTGACCCAGCATGGCAA	0.247666	0
DNA	1	chr17	9278668	+	3	GCAGTATAATGGAGCTCAGAAGAG	GCAGTATAATGGAGCTCAGAAGAG	GCAGCATAGT-GAGCCCAGAANRG	GCAGCATAGTGAGCCCAGAANRG				0	0	0	0	44.16	0	0	0	TATGCAGTATAATGGAGCTCAGAAGAGAG	0.143802	0
DNA	1	chr17	43619377	-	3	GCAGCCTTGTAGAGACCAGAACAG	GCAGCCTTGTAGAGACCAGAACAG	GCAGCATAGT-GAGCCCAGAANRG	GCAGCATAGTGAGCCCAGAANRG				0	0	0	0	44.62	0	0	0	GAGCAGCCTTGTAGAGACCAGAACAGCAC	0.0898562	0
DNA	1	chr17	70939453	-	3	GAAAGATAGTGAGGCCCAGAAAAG	GAAAGATAGTGAGGCCCAGAAAAG	GCAGCATAGTGA-GCCCAGAANRG	GCAGCATAGTGAGCCCAGAANRG				0	0	0	0	46.11	0	0	0	CTGAAAGATAGTGAGGCCCAGAAAAGTTC	0.132929	0
DNA	1	chrY	3666109	+	3	GCTTGCATAGTGTACCCAGAAAAG	GCTTGCATAGTGTACCCAGAAAAG	GC-AGCATAGTGAGCCCAGAANRG	GCAGCATAGTGAGCCCAGAANRG				0	0	0	0	44.98	0	0	0	AAAGCTTGCATAGTGTACCCAGAAAAGCT	0.0910158	0
DNA	1	chrY	1943825	+	3	ACAGCATAGAGAACCCAGAAACAG	ACAGCATAGAGAACCCAGAAACAG	GCAGCATAGTGAGCCCAGA-ANRG	GCAGCATAGTGAGCCCAGAANRG				0	0	0	0	39.98	0	0	0	GGAACAGCATAGAGAACCCAGAAACAGAT	0.433567	0
RNA	1	chrY	12280550	+	2	GCAGCC-AGTGAGCCCACAAAAG	GCAGCCAGTGAGCCCACAAAAG	GCAGCATAGTGAGCCCAGAANRG	GCAGCATAGTGAGCCCAGAANRG				0	0	0	0	43.45	0	0	0	CTCGCAGCCAGTGAGCCCACAAAAGGAGT	0.256078	0
DNA	1	chrY	1943825	+	3	ACAGCATAGAGAACCCAGAAACAG	ACAGCATAGAGAACCCAGAAACAG	GCAGCATAGTGAGCCCAG-AANRG	GCAGCATAGTGAGCCCAGAANRG				0	0	0	0	40.98	0	0	0	GGAACAGCATAGAGAACCCAGAAACAGAT	0.433567	0
DNA	1	chr15	68411981	+	3	GCAAGCCCAGTGAGCCCAGCAGAG	GCAAGCCCAGTGAGCCCAGCAGAG	GCA-GCATAGTGAGCCCAGAANRG	GCAGCATAGTGAGCCCAGAANRG				0	0	0	0	41.03	0	0	0	CAAGCAAGCCCAGTGAGCCCAGCAGAGCC	0.150127	0
DNA	1	chr15	52176773	+	2	GCAGGCAGAGTGAGCCCAGTAAAG	GCAGGCAGAGTGAGCCCAGTAAAG	GCA-GCATAGTGAGCCCAGAANRG	GCAGCATAGTGAGCCCAGAANRG				0	0	0	0	41.26	0	0	0	ATGGCAGGCAGAGTGAGCCCAGTAAAGCA	0.12649	0
DNA	1	chr15	48622366	+	3	GCATGCATGGTAAGCTCAGAAGAG	GCATGCATGGTAAGCTCAGAAGAG	GCA-GCATAGTGAGCCCAGAANRG	GCAGCATAGTGAGCCCAGAANRG				0	0	0	0	44.08	0	0	0	ACAGCATGCATGGTAAGCTCAGAAGAGGA	0.132407	0
DNA	1	chr15	88584353	+	3	ACAGCATAGAGAGCCCCAAAATAG	ACAGCATAGAGAGCCCCAAAATAG	GCAGCATAGTGAGCC-CAGAANRG	GCAGCATAGTGAGCCCAGAANRG				0	0	0	0	39.78	0	0	0	GGAACAGCATAGAGAGCCCCAAAATAGAC	0.37725	0
DNA	1	chr15	66323622	-	3	GCAGCATCAGGAGCCACAGAAGGG	GCAGCATCAGGAGCCACAGAAGGG	GCAGCATAGTGAGCC-CAGAANRG	GCAGCATAGTGAGCCCAGAANRG				0	0	0	0	44.28	0	0	0	AGGCAGCATCAGGAGCCACAGAAGGGCCA	0.256637	0
RNA	1	chrY	12280550	+	2	GCAGC-CAGTGAGCCCACAAAAG	GCAGCCAGTGAGCCCACAAAAG	GCAGCATAGTGAGCCCAGAANRG	GCAGCATAGTGAGCCCAGAANRG				0	0	0	0	43.45	0	0	0	CTCGCAGCCAGTGAGCCCACAAAAGGAGT	0.256078	0
DNA	1	chr15	69057502	-	3	GCCAGCATACAGAGCCCAGAGAGG	GCCAGCATACAGAGCCCAGAGAGG	G-CAGCATAGTGAGCCCAGAANRG	GCAGCATAGTGAGCCCAGAANRG				0	0	0	0	46.37	0	0	0	AGGCCAGCATACAGAGCCCAGAGAGGCTC	0.382205	0
DNA	1	chr15	63348535	-	3	GGCAGTATTGTGAGCACAGAAAAG	GGCAGTATTGTGAGCACAGAAAAG	G-CAGCATAGTGAGCCCAGAANRG	GCAGCATAGTGAGCCCAGAANRG				0	0	0	0	44.71	0	0	0	CAGGCAGTATTGTGAGCACAGAAAAGGCT	0.37704	0
RNA	1	chr17	20750015	-	2	GCAG-ATAGAGAGCCCAGTACGG	GCAGATAGAGAGCCCAGTACGG	GCAGCATAGTGAGCCCAGAANRG	GCAGCATAGTGAGCCCAGAANRG				0	0	0	0	42.2	0	0	0	GAGTGCAGATAGAGAGCCCAGTACGGGAC	0.227488	0
DNA	1	chr17	40484889	-	3	GAAGCACGAGTGACCCCAGAATAG	GAAGCACGAGTGACCCCAGAATAG	GCAGCAT-AGTGAGCCCAGAANRG	GCAGCATAGTGAGCCCAGAANRG				0	0	0	0	45.77	0	0	0	AGGAAGCACGAGTGACCCCAGAATAGGGT	0.101736	0
DNA	1	chr17	32147928	-	3	GCATCAGAAGTGGGCCCAGAAAAG	GCATCAGAAGTGGGCCCAGAAAAG	GCAGCAT-AGTGAGCCCAGAANRG	GCAGCATAGTGAGCCCAGAANRG				0	0	0	0	45.93	0	0	0	ACGCATCAGAAGTGGGCCCAGAAAAGATG	0.129338	0
DNA	1	chr17	3957524	-	3	GCACCATCAGTGAGGCCAGCAGGG	GCACCATCAGTGAGGCCAGCAGGG	GCAGCAT-AGTGAGCCCAGAANRG	GCAGCATAGTGAGCCCAGAANRG				0	0	0	0	39.36	0	0	0	AAGCACCATCAGTGAGGCCAGCAGGGCCT	0.185382	0
DNA	1	chr17	74143105	+	3	GTAGAATAGTGAGTCCAGAAATAG	GTAGAATAGTGAGTCCAGAAATAG	GCAGCATAGTGAGCCCAG-AANRG	GCAGCATAGTGAGCCCAGAANRG				0	0	0	0	41.08	0	0	0	GCAGTAGAATAGTGAGTCCAGAAATAGAC	0.546809	0
DNA	1	chr17	73854571	+	3	GCAACATAGTGAGACCAGGCATGG	GCAACATAGTGAGACCAGGCATGG	GCAGCATAGTGAGCCCAG-AANRG	GCAGCATAGTGAGCCCAGAANRG				0	0	0	0	35.23	0	0	0	TGGGCAACATAGTGAGACCAGGCATGGTG	0.391961	0
DNA	1	chr17	60057934	-	3	ACAGAATAGAGAGCCCAGAAATAG	ACAGAATAGAGAGCCCAGAAATAG	GCAGCATAGTGAGCCCAG-AANRG	GCAGCATAGTGAGCCCAGAANRG				0	0	0	0	41.89	0	0	0	GAACAGAATAGAGAGCCCAGAAATAGACC	0.117788	0
DNA	1	chr17	21158852	+	3	ACAGAATAGAGAGCCCAGAAATAG	ACAGAATAGAGAGCCCAGAAATAG	GCAGCATAGTGAGCCCAG-AANRG	GCAGCATAGTGAGCCCAGAANRG				0	0	0	0	41.89	0	0	0	GGAACAGAATAGAGAGCCCAGAAATAGAC	0.453381	0
DNA	1	chr17	5964569	-	3	ACAGAATAGAGAGCCCAGAAATAG	ACAGAATAGAGAGCCCAGAAATAG	GCAGCATAGTGAGCCCAG-AANRG	GCAGCATAGTGAGCCCAGAANRG				0	0	0	0	41.89	0	0	0	GAACAGAATAGAGAGCCCAGAAATAGACC	0.117788	0
DNA	1	chr17	70939453	-	3	GAAAGATAGTGAGGCCCAGAAAAG	GAAAGATAGTGAGGCCCAGAAAAG	GCAGCATAGTGAG-CCCAGAANRG	GCAGCATAGTGAGCCCAGAANRG				0	0	0	0	45.91	0	0	0	CTGAAAGATAGTGAGGCCCAGAAAAGTTC	0.132929	0
DNA	1	chrY	3666109	+	3	GCTTGCATAGTGTACCCAGAAAAG	GCTTGCATAGTGTACCCAGAAAAG	GCA-GCATAGTGAGCCCAGAANRG	GCAGCATAGTGAGCCCAGAANRG				0	0	0	0	44.98	0	0	0	AAAGCTTGCATAGTGTACCCAGAAAAGCT	0.0910158	0
DNA	1	chr10	1247612	+	3	GCAGCATAGTGAGGTGGAGAACAG	GCAGCATAGTGAGGTGGAGAACAG	GCAGCATAGTGAGCC-CAGAANRG	GCAGCATAGTGAGCCCAGAANRG				0	0	0	0	39.2	0	0	0	CAGGCAGCATAGTGAGGTGGAGAACAGAG	0.134265	0
DNA	1	chr10	123748974	-	3	GCACGCATGTTGAGCACAGAAGAG	GCACGCATGTTGAGCACAGAAGAG	GCA-GCATAGTGAGCCCAGAANRG	GCAGCATAGTGAGCCCAGAANRG				0	0	0	0	44.38	0	0	0	TGGCACGCATGTTGAGCACAGAAGAGGAA	0.122891	0
DNA	1	chr10	97749484	-	3	GCATGCAGACTGTGCCCAGAAGAG	GCATGCAGACTGTGCCCAGAAGAG	GCA-GCATAGTGAGCCCAGAANRG	GCAGCATAGTGAGCCCAGAANRG				0	0	0	0	45.66	0	0	0	CAGCATGCAGACTGTGCCCAGAAGAGCCC	0.0862257	0
DNA	1	chr10	86385382	+	3	AACAGAATAGAGAGCCCAGAAAGG	AACAGAATAGAGAGCCCAGAAAGG	G-CAGCATAGTGAGCCCAGAANRG	GCAGCATAGTGAGCCCAGAANRG				0	0	0	0	46.54	0	0	0	TGGAACAGAATAGAGAGCCCAGAAAGGAC	0.0619851	0
DNA	1	chr10	89954017	-	3	GCAGCATAGGGATTCCAGGAAAAG	GCAGCATAGGGATTCCAGGAAAAG	GCAGCATAGTGAGCCCA-GAANRG	GCAGCATAGTGAGCCCAGAANRG				0	0	0	0	40.8	0	0	0	GGGCAGCATAGGGATTCCAGGAAAAGCAC	0.118815	0
DNA	1	chr10	6021442	+	3	GCAACATTGTGGACCCCAGAAGGG	GCAACATTGTGGACCCCAGAAGGG	GCAGCATAGT-GAGCCCAGAANRG	GCAGCATAGTGAGCCCAGAANRG				0	0	0	0	45.26	0	0	0	AAAGCAACATTGTGGACCCCAGAAGGGAG	0.148856	0
RNA	1	chr6	122701145	+	2	GCAGCAGAG-GAGACCAGAAAGG	GCAGCAGAGGAGACCAGAAAGG	GCAGCATAGTGAGCCCAGAANRG	GCAGCATAGTGAGCCCAGAANRG				0	0	0	0	45.86	0	0	0	GCAGCAGCAGAGGAGACCAGAAAGGTCAC	0.158918	0
RNA	1	chr6	84582896	+	2	GCAG-TTAGTGACCCCAGAACAG	GCAGTTAGTGACCCCAGAACAG	GCAGCATAGTGAGCCCAGAANRG	GCAGCATAGTGAGCCCAGAANRG				0	0	0	0	46.39	0	0	0	AAAGCAGTTAGTGACCCCAGAACAGCTCT	0.201837	0
DNA	1	chr6	15906514	+	3	GCAGCACAGTGAGGAACAGAAAGG	GCAGCACAGTGAGGAACAGAAAGG	GCAGCATAGTGAGC-CCAGAANRG	GCAGCATAGTGAGCCCAGAANRG				0	0	0	0	41.97	0	0	0	AAGGCAGCACAGTGAGGAACAGAAAGGAG	0.0881732	0
RNA	1	chr6	84582896	+	2	GCAGT-TAGTGACCCCAGAACAG	GCAGTTAGTGACCCCAGAACAG	GCAGCATAGTGAGCCCAGAANRG	GCAGCATAGTGAGCCCAGAANRG				0	0	0	0	46.39	0	0	0	AAAGCAGTTAGTGACCCCAGAACAGCTCT	0.201837	0
DNA	1	chr10	47015010	+	3	GCAGCCAAGTGAAACCCAGAATGG	GCAGCCAAGTGAAACCCAGAATGG	GCAGCATAGTGA-GCCCAGAANRG	GCAGCATAGTGAGCCCAGAANRG				0	0	0	0	44.86	0	0	0	AAAGCAGCCAAGTGAAACCCAGAATGGGT	0.129361	0
DNA	1	chr10	1247612	+	3	GCAGCATAGTGAGGTGGAGAACAG	GCAGCATAGTGAGGTGGAGAACAG	GCAGCATAGTGA-GCCCAGAANRG	GCAGCATAGTGAGCCCAGAANRG				0	0	0	0	39.4	0	0	0	CAGGCAGCATAGTGAGGTGGAGAACAGAG	0.134265	0
DNA	1	chr6	29307141	-	3	GCAGCATGCATGAGCCCAGAGAGG	GCAGCATGCATGAGCCCAGAGAGG	GCAGCATAG-TGAGCCCAGAANRG	GCAGCATAGTGAGCCCAGAANRG				0	0	0	0	46.58	0	0	0	TGGCAGCATGCATGAGCCCAGAGAGGCCC	0.286673	0
DNA	1	chr6	159655155	+	3	GCAACATTGTAAGACCCAGAAGAG	GCAACATTGTAAGACCCAGAAGAG	GCAGCATAGTGAG-CCCAGAANRG	GCAGCATAGTGAGCCCAGAANRG				0	0	0	0	45.26	0	0	0	GGGGCAACATTGTAAGACCCAGAAGAGGA	0.160755	0
DNA	1	chr6	91984888	+	3	GCAGCCTTGTGAGACCCTGAACAG	GCAGCCTTGTGAGACCCTGAACAG	GCAGCATAGTGAG-CCCAGAANRG	GCAGCATAGTGAGCCCAGAANRG				0	0	0	0	41.92	0	0	0	ATGGCAGCCTTGTGAGACCCTGAACAGAG	0.0830843	0
DNA	1	chr6	15906514	+	3	GCAGCACAGTGAGGAACAGAAAGG	GCAGCACAGTGAGGAACAGAAAGG	GCAGCATAGTGAG-CCCAGAANRG	GCAGCATAGTGAGCCCAGAANRG				0	0	0	0	41.97	0	0	0	AAGGCAGCACAGTGAGGAACAGAAAGGAG	0.0881732	0
DNA	1	chr6	105519822	-	3	GGCGCATAGTGTGACCCAGAAGGG	GGCGCATAGTGTGACCCAGAAGGG	GCAGCATAGTGAG-CCCAGAANRG	GCAGCATAGTGAGCCCAGAANRG				0	0	0	0	45.32	0	0	0	GAGGCGCATAGTGTGACCCAGAAGGGAAC	0.176488	0
DNA	1	chr10	122129724	-	3	GAAGAAGCAGTGAGCCCAGAAGAG	GAAGAAGCAGTGAGCCCAGAAGAG	GCAGCAT-AGTGAGCCCAGAANRG	GCAGCATAGTGAGCCCAGAANRG				0	0	0	0	46.88	0	0	0	TGGAAGAAGCAGTGAGCCCAGAAGAGGGA	0.139281	0
DNA	1	chr10	1323640	+	3	GCAGAATAGAGAACCCAGTAAAGG	GCAGAATAGAGAACCCAGTAAAGG	GCAGCATAGTGAGCCCAG-AANRG	GCAGCATAGTGAGCCCAGAANRG				0	0	0	0	40.91	0	0	0	AGAGCAGAATAGAGAACCCAGTAAAGGTA	0.148819	0
DNA	1	chr10	125300045	+	3	ACAGAATAGAGAGCCCAGAAATAG	ACAGAATAGAGAGCCCAGAAATAG	GCAGCATAGTGAGCCCAG-AANRG	GCAGCATAGTGAGCCCAGAANRG				0	0	0	0	41.89	0	0	0	GGAACAGAATAGAGAGCCCAGAAATAGAC	0.453381	0
DNA	1	chr10	93100046	-	3	ACAGAATAGAGAGCCCAGAAATAG	ACAGAATAGAGAGCCCAGAAATAG	GCAGCATAGTGAGCCCAG-AANRG	GCAGCATAGTGAGCCCAGAANRG				0	0	0	0	41.89	0	0	0	GAACAGAATAGAGAGCCCAGAAATAGGCA	0.110018	0
DNA	1	chr10	89954017	-	3	GCAGCATAGGGATTCCAGGAAAAG	GCAGCATAGGGATTCCAGGAAAAG	GCAGCATAGTGAGCCCAG-AANRG	GCAGCATAGTGAGCCCAGAANRG				0	0	0	0	39.8	0	0	0	GGGCAGCATAGGGATTCCAGGAAAAGCAC	0.118815	0
DNA	1	chr10	87985220	+	3	ACAGAATAGAGAGCCCAGAAATAG	ACAGAATAGAGAGCCCAGAAATAG	GCAGCATAGTGAGCCCAG-AANRG	GCAGCATAGTGAGCCCAGAANRG				0	0	0	0	41.89	0	0	0	GGAACAGAATAGAGAGCCCAGAAATAGCC	0.45202	0
DNA	1	chr10	80887898	+	3	GCAGAATAGGGAGCACAGAAACAG	GCAGAATAGGGAGCACAGAAACAG	GCAGCATAGTGAGCCCAG-AANRG	GCAGCATAGTGAGCCCAGAANRG				0	0	0	0	40.11	0	0	0	GGAGCAGAATAGGGAGCACAGAAACAGGC	0.346415	0
DNA	1	chr10	36656046	+	3	ACAGAATAGAGAGCCCAGAAATAG	ACAGAATAGAGAGCCCAGAAATAG	GCAGCATAGTGAGCCCAG-AANRG	GCAGCATAGTGAGCCCAGAANRG				0	0	0	0	41.89	0	0	0	AGAACAGAATAGAGAGCCCAGAAATAGGC	0.453695	0
DNA	1	chr10	1876420	-	3	GCAGAACAGAGAGCCCAGAAATAG	GCAGAACAGAGAGCCCAGAAATAG	GCAGCATAGTGAGCCCAG-AANRG	GCAGCATAGTGAGCCCAGAANRG				0	0	0	0	41.78	0	0	0	GAGCAGAACAGAGAGCCCAGAAATAGACC	0.129192	0
DNA	1	chr10	1247612	+	3	GCAGCATAGTGAGGTGGAGAACAG	GCAGCATAGTGAGGTGGAGAACAG	GCAGCATAGTGAGC-CCAGAANRG	GCAGCATAGTGAGCCCAGAANRG				0	0	0	0	39.2	0	0	0	CAGGCAGCATAGTGAGGTGGAGAACAGAG	0.134265	0
DNA	1	chr10	103079388	-	3	GAAGCAGACGTGAGCCCAGATAGG	GAAGCAGACGTGAGCCCAGATAGG	GCAGCATA-GTGAGCCCAGAANRG	GCAGCATAGTGAGCCCAGAANRG				0	0	0	0	46.99	0	0	0	GAGAAGCAGACGTGAGCCCAGATAGGTTG	0.17646	0
DNA	1	chr10	118681179	-	3	GAAGCCATAGTGAGCTCAGCACAG	GAAGCCATAGTGAGCTCAGCACAG	GCAGC-ATAGTGAGCCCAGAANRG	GCAGCATAGTGAGCCCAGAANRG				0	0	0	0	39.06	0	0	0	CAGAAGCCATAGTGAGCTCAGCACAGGGC	0.105354	0
DNA	1	chr10	116273259	-	3	GCAGATAAAGTGAGCCCGGAAAGG	GCAGATAAAGTGAGCCCGGAAAGG	GCAGC-ATAGTGAGCCCAGAANRG	GCAGCATAGTGAGCCCAGAANRG				0	0	0	0	43.03	0	0	0	GCGCAGATAAAGTGAGCCCGGAAAGGGAA	0.214899	0
DNA	1	chr10	85764430	+	3	GCAGAGAGAGTAAGCCCAGAATGG	GCAGAGAGAGTAAGCCCAGAATGG	GCAGC-ATAGTGAGCCCAGAANRG	GCAGCATAGTGAGCCCAGAANRG				0	0	0	0	46.23	0	0	0	TGGGCAGAGAGAGTAAGCCCAGAATGGAC	0.123051	0
DNA	1	chr10	7260453	-	3	GCAGCCATCTTGAGCCCACAAGGG	GCAGCCATCTTGAGCCCACAAGGG	GCAGC-ATAGTGAGCCCAGAANRG	GCAGCATAGTGAGCCCAGAANRG				0	0	0	0	41.64	0	0	0	CTGCAGCCATCTTGAGCCCACAAGGGAGG	0.198604	0
RNA	1	chr10	116178274	+	2	GGAGCAT-GTGAGCCCACAAGGG	GGAGCATGTGAGCCCACAAGGG	GCAGCATAGTGAGCCCAGAANRG	GCAGCATAGTGAGCCCAGAANRG				0	0	0	0	43.49	0	0	0	CCTGGAGCATGTGAGCCCACAAGGGGCCG	0.176612	0
DNA	1	chr10	50316333	+	3	GCAGCCTAGAGCAGCCCAGGAAAG	GCAGCCTAGAGCAGCCCAGGAAAG	GCAGCATAGTG-AGCCCAGAANRG	GCAGCATAGTGAGCCCAGAANRG				0	0	0	0	40.19	0	0	0	GCTGCAGCCTAGAGCAGCCCAGGAAAGTC	0.0992284	0
DNA	1	chr10	47015010	+	3	GCAGCCAAGTGAAACCCAGAATGG	GCAGCCAAGTGAAACCCAGAATGG	GCAGCATAGTG-AGCCCAGAANRG	GCAGCATAGTGAGCCCAGAANRG				0	0	0	0	45.16	0	0	0	AAAGCAGCCAAGTGAAACCCAGAATGGGT	0.129361	0
DNA	1	chr10	6021442	+	3	GCAACATTGTGGACCCCAGAAGGG	GCAACATTGTGGACCCCAGAAGGG	GCAGCATAGTG-AGCCCAGAANRG	GCAGCATAGTGAGCCCAGAANRG				0	0	0	0	45.16	0	0	0	AAAGCAACATTGTGGACCCCAGAAGGGAG	0.148856	0
DNA	1	chr10	62345192	+	3	GCAGCAGAGTGAGACCACAGACAG	GCAGCAGAGTGAGACCACAGACAG	GCAGCATAGTGAGCCCAGA-ANRG	GCAGCATAGTGAGCCCAGAANRG				0	0	0	0	36.17	0	0	0	TGGGCAGCAGAGTGAGACCACAGACAGAG	0.208582	0
DNA	1	chr10	36656046	+	3	ACAGAATAGAGAGCCCAGAAATAG	ACAGAATAGAGAGCCCAGAAATAG	GCAGCATAGTGAGCCCAGA-ANRG	GCAGCATAGTGAGCCCAGAANRG				0	0	0	0	40.89	0	0	0	AGAACAGAATAGAGAGCCCAGAAATAGGC	0.453695	0
DNA	1	chr10	31572438	+	3	ACAGAATAGAGAGCCCAGAGATAG	ACAGAATAGAGAGCCCAGAGATAG	GCAGCATAGTGAGCCCAGA-ANRG	GCAGCATAGTGAGCCCAGAANRG				0	0	0	0	40.89	0	0	0	GGAACAGAATAGAGAGCCCAGAGATAGAC	0.308794	0
DNA	1	chr10	1876420	-	3	GCAGAACAGAGAGCCCAGAAATAG	GCAGAACAGAGAGCCCAGAAATAG	GCAGCATAGTGAGCCCAGA-ANRG	GCAGCATAGTGAGCCCAGAANRG				0	0	0	0	40.78	0	0	0	GAGCAGAACAGAGAGCCCAGAAATAGACC	0.129192	0
DNA	1	chr10	80887898	+	3	GCAGAATAGGGAGCACAGAAACAG	GCAGAATAGGGAGCACAGAAACAG	GCAGCATAGTGAGCCCAGA-ANRG	GCAGCATAGTGAGCCCAGAANRG				0	0	0	0	39.11	0	0	0	GGAGCAGAATAGGGAGCACAGAAACAGGC	0.346415	0
DNA	1	chr10	87985220	+	3	ACAGAATAGAGAGCCCAGAAATAG	ACAGAATAGAGAGCCCAGAAATAG	GCAGCATAGTGAGCCCAGA-ANRG	GCAGCATAGTGAGCCCAGAANRG				0	0	0	0	40.89	0	0	0	GGAACAGAATAGAGAGCCCAGAAATAGCC	0.45202	0
DNA	1	chr10	93100046	-	3	ACAGAATAGAGAGCCCAGAAATAG	ACAGAATAGAGAGCCCAGAAATAG	GCAGCATAGTGAGCCCAGA-ANRG	GCAGCATAGTGAGCCCAGAANRG				0	0	0	0	40.89	0	0	0	GAACAGAATAGAGAGCCCAGAAATAGGCA	0.110018	0
DNA	1	chr10	125300045	+	3	ACAGAATAGAGAGCCCAGAAATAG	ACAGAATAGAGAGCCCAGAAATAG	GCAGCATAGTGAGCCCAGA-ANRG	GCAGCATAGTGAGCCCAGAANRG				0	0	0	0	40.89	0	0	0	GGAACAGAATAGAGAGCCCAGAAATAGAC	0.453381	0
DNA	1	chr10	122129724	-	3	GAAGAAGCAGTGAGCCCAGAAGAG	GAAGAAGCAGTGAGCCCAGAAGAG	GCAGCA-TAGTGAGCCCAGAANRG	GCAGCATAGTGAGCCCAGAANRG				0	0	0	0	46.88	0	0	0	TGGAAGAAGCAGTGAGCCCAGAAGAGGGA	0.139281	0
DNA	1	chr10	118681179	-	3	GAAGCCATAGTGAGCTCAGCACAG	GAAGCCATAGTGAGCTCAGCACAG	GCAG-CATAGTGAGCCCAGAANRG	GCAGCATAGTGAGCCCAGAANRG				0	0	0	0	39.08	0	0	0	CAGAAGCCATAGTGAGCTCAGCACAGGGC	0.105354	0
DNA	1	chr10	116273259	-	3	GCAGATAAAGTGAGCCCGGAAAGG	GCAGATAAAGTGAGCCCGGAAAGG	GCAG-CATAGTGAGCCCAGAANRG	GCAGCATAGTGAGCCCAGAANRG				0	0	0	0	43.03	0	0	0	GCGCAGATAAAGTGAGCCCGGAAAGGGAA	0.214899	0
DNA	1	chr10	85764430	+	3	GCAGAGAGAGTAAGCCCAGAATGG	GCAGAGAGAGTAAGCCCAGAATGG	GCAG-CATAGTGAGCCCAGAANRG	GCAGCATAGTGAGCCCAGAANRG				0	0	0	0	46.23	0	0	0	TGGGCAGAGAGAGTAAGCCCAGAATGGAC	0.123051	0
DNA	1	chr10	17521550	+	3	GCTGACATAGTGAGTCCAGAGTGG	GCTGACATAGTGAGTCCAGAGTGG	GCAG-CATAGTGAGCCCAGAANRG	GCAGCATAGTGAGCCCAGAANRG				0	0	0	0	45.46	0	0	0	CCTGCTGACATAGTGAGTCCAGAGTGGAC	0.173263	0
DNA	1	chr10	7260453	-	3	GCAGCCATCTTGAGCCCACAAGGG	GCAGCCATCTTGAGCCCACAAGGG	GCAG-CATAGTGAGCCCAGAANRG	GCAGCATAGTGAGCCCAGAANRG				0	0	0	0	41.66	0	0	0	CTGCAGCCATCTTGAGCCCACAAGGGAGG	0.198604	0
DNA	1	chr10	1247612	+	3	GCAGCATAGTGAGGTGGAGAACAG	GCAGCATAGTGAGGTGGAGAACAG	GCAGCATAGTGAGCCC-AGAANRG	GCAGCATAGTGAGCCCAGAANRG				0	0	0	0	39.2	0	0	0	CAGGCAGCATAGTGAGGTGGAGAACAGAG	0.134265	0
DNA	1	chr19	23592855	+	3	ACAGAATAGTGAACCCAGAAATAG	ACAGAATAGTGAACCCAGAAATAG	GCAGCATAGTGAGCCCAG-AANRG	GCAGCATAGTGAGCCCAGAANRG				0	0	0	0	41.29	0	0	0	GGAACAGAATAGTGAACCCAGAAATAGAG	0.529746	0
RNA	1	chr19	33216150	-	2	GCAG-ATGATGAGCCCAGAATGG	GCAGATGATGAGCCCAGAATGG	GCAGCATAGTGAGCCCAGAANRG	GCAGCATAGTGAGCCCAGAANRG				0	0	0	0	47.08	0	0	0	AGGGGCAGATGATGAGCCCAGAATGGCAC	0.333802	0
DNA	1	chr19	43705546	-	3	GCAACATAGGGAGACCAGAAAGAG	GCAACATAGGGAGACCAGAAAGAG	GCAGCATAGTGAGCCCAG-AANRG	GCAGCATAGTGAGCCCAGAANRG				0	0	0	0	40.73	0	0	0	GGGCAACATAGGGAGACCAGAAAGAGAAA	0.126482	0
DNA	1	chr22	36936374	-	3	CCAGCAAAGTGAGGCCCAGAGAGG	CCAGCAAAGTGAGGCCCAGAGAGG	GCAGCATAGTGA-GCCCAGAANRG	GCAGCATAGTGAGCCCAGAANRG				0	0	0	0	46.25	0	0	0	CACCAGCAAAGTGAGGCCCAGAGAGGGGC	0.211517	0
DNA	1	chr19	29389346	+	3	GAAGCATGGCTGAGCCCAGAGAAG	GAAGCATGGCTGAGCCCAGAGAAG	GCAGCATAG-TGAGCCCAGAANRG	GCAGCATAGTGAGCCCAGAANRG				0	0	0	0	46.8	0	0	0	GGAGAAGCATGGCTGAGCCCAGAGAAGCT	0.110276	0
DNA	1	chr19	15979176	+	3	GCAGCATCAGGGAGCCCAGAAGAG	GCAGCATCAGGGAGCCCAGAAGAG	GCAGCATAG-TGAGCCCAGAANRG	GCAGCATAGTGAGCCCAGAANRG				0	0	0	0	45.88	0	0	0	TGGGCAGCATCAGGGAGCCCAGAAGAGAA	0.149598	0
RNA	1	chr19	33484391	+	2	GCAGCAAAGTGA-CCCAGCACAG	GCAGCAAAGTGACCCAGCACAG	GCAGCATAGTGAGCCCAGAANRG	GCAGCATAGTGAGCCCAGAANRG				0	0	0	0	41.56	0	0	0	CAAGCAGCAAAGTGACCCAGCACAGAGTG	0.142899	0
DNA	1	chr19	55167771	-	3	GCAGCAGACTGAGGCTCAGAAAGG	GCAGCAGACTGAGGCTCAGAAAGG	GCAGCATAGTGAG-CCCAGAANRG	GCAGCATAGTGAGCCCAGAANRG				0	0	0	0	43.52	0	0	0	GAGCAGCAGACTGAGGCTCAGAAAGGGTG	0.192815	0
DNA	1	chr19	15979176	+	1	GCAGCATCAGGGAGCCCAGAAGAG	GCAGCATCAGGGAGCCCAGAAGAG	GCAGCAT-AGTGAGCCCAGAANRG	GCAGCATAGTGAGCCCAGAANRG				0	0	0	0	46.73	0	0	0	TGGGCAGCATCAGGGAGCCCAGAAGAGAA	0.149598	0
DNA	1	chr19	15979176	+	3	GCAGCATCAGGGAGCCCAGAAGAG	GCAGCATCAGGGAGCCCAGAAGAG	GCAGC-ATAGTGAGCCCAGAANRG	GCAGCATAGTGAGCCCAGAANRG				0	0	0	0	46.29	0	0	0	TGGGCAGCATCAGGGAGCCCAGAAGAGAA	0.149598	0
DNA	1	chr19	15979176	+	2	GCAGCATCAGGGAGCCCAGAAGAG	GCAGCATCAGGGAGCCCAGAAGAG	GCAGCATA-GTGAGCCCAGAANRG	GCAGCATAGTGAGCCCAGAANRG				0	0	0	0	46.38	0	0	0	TGGGCAGCATCAGGGAGCCCAGAAGAGAA	0.149598	0
DNA	1	chr19	15979176	+	3	GCAGCATCAGGGAGCCCAGAAGAG	GCAGCATCAGGGAGCCCAGAAGAG	GCAGCATAGTG-AGCCCAGAANRG	GCAGCATAGTGAGCCCAGAANRG				0	0	0	0	45.78	0	0	0	TGGGCAGCATCAGGGAGCCCAGAAGAGAA	0.149598	0
DNA	1	chr19	44617950	+	3	GCAGCAGAGTGGAGCAGAGAAGGG	GCAGCAGAGTGGAGCAGAGAAGGG	GCAGCATAGTG-AGCCCAGAANRG	GCAGCATAGTGAGCCCAGAANRG				0	0	0	0	41.37	0	0	0	CAGGCAGCAGAGTGGAGCAGAGAAGGGTA	0.139638	0
DNA	1	chr19	30533863	+	3	GAAGAAAAGTGAGCCCAGAGAAGG	GAAGAAAAGTGAGCCCAGAGAAGG	GCAGCATAGTGAGCCCAGA-ANRG	GCAGCATAGTGAGCCCAGAANRG				0	0	0	0	41.15	0	0	0	CTGGAAGAAAAGTGAGCCCAGAGAAGGTT	0.152295	0
DNA	1	chr19	23592855	+	3	ACAGAATAGTGAACCCAGAAATAG	ACAGAATAGTGAACCCAGAAATAG	GCAGCATAGTGAGCCCAGA-ANRG	GCAGCATAGTGAGCCCAGAANRG				0	0	0	0	40.29	0	0	0	GGAACAGAATAGTGAACCCAGAAATAGAG	0.529746	0
DNA	1	chr19	43551921	+	3	GCAGCATAGTGGACACAGAGAAAG	GCAGCATAGTGGACACAGAGAAAG	GCAGCATAGTGAGCCCAGA-ANRG	GCAGCATAGTGAGCCCAGAANRG				0	0	0	0	37.9	0	0	0	CATGCAGCATAGTGGACACAGAGAAAGCA	0.247258	0
DNA	1	chr19	43705546	-	3	GCAACATAGGGAGACCAGAAAGAG	GCAACATAGGGAGACCAGAAAGAG	GCAGCATAGTGAGCCCAGA-ANRG	GCAGCATAGTGAGCCCAGAANRG				0	0	0	0	39.73	0	0	0	GGGCAACATAGGGAGACCAGAAAGAGAAA	0.126482	0
DNA	1	chr19	15979176	+	2	GCAGCATCAGGGAGCCCAGAAGAG	GCAGCATCAGGGAGCCCAGAAGAG	GCAGCA-TAGTGAGCCCAGAANRG	GCAGCATAGTGAGCCCAGAANRG				0	0	0	0	46.5	0	0	0	TGGGCAGCATCAGGGAGCCCAGAAGAGAA	0.149598	0
DNA	1	chr22	34816580	+	2	GGAGCATCAGTGAGGCCAGAAAGG	GGAGCATCAGTGAGGCCAGAAAGG	GCAGCAT-AGTGAGCCCAGAANRG	GCAGCATAGTGAGCCCAGAANRG				0	0	0	0	45.4	0	0	0	TGAGGAGCATCAGTGAGGCCAGAAAGGCT	0.10431	0
DNA	1	chr22	49222910	+	2	GCAGAATAGAGAGCCCAGAAAGAG	GCAGAATAGAGAGCCCAGAAAGAG	GCAGCATAGTGAGCCCAGA-ANRG	GCAGCATAGTGAGCCCAGAANRG				0	0	0	0	41.01	0	0	0	GGAGCAGAATAGAGAGCCCAGAAAGAGAC	0.565929	0
DNA	1	chr22	34571885	-	3	ACAGAATAGAGAGCCCAGAAATAG	ACAGAATAGAGAGCCCAGAAATAG	GCAGCATAGTGAGCCCAGA-ANRG	GCAGCATAGTGAGCCCAGAANRG				0	0	0	0	40.89	0	0	0	GAACAGAATAGAGAGCCCAGAAATAGACC	0.117788	0
DNA	1	chr22	30900599	+	3	ACAGATTAGTGAGCCCAGAAACAG	ACAGATTAGTGAGCCCAGAAACAG	GCAGCATAGTGAGCCCAGA-ANRG	GCAGCATAGTGAGCCCAGAANRG				0	0	0	0	41.18	0	0	0	GGAACAGATTAGTGAGCCCAGAAACAGAC	0.410288	0
DNA	1	chr22	28057915	-	2	GCAGAATAGAGAGCCCAGAAATAG	GCAGAATAGAGAGCCCAGAAATAG	GCAGCATAGTGAGCCCAGA-ANRG	GCAGCATAGTGAGCCCAGAANRG				0	0	0	0	41.01	0	0	0	GAGCAGAATAGAGAGCCCAGAAATAGACC	0.28649	0
DNA	1	chr22	49130878	-	3	ACAGAATAGAGAGCCCAGAAATAG	ACAGAATAGAGAGCCCAGAAATAG	GCAGCATAGTGAGCCCAGA-ANRG	GCAGCATAGTGAGCCCAGAANRG				0	0	0	0	40.89	0	0	0	GAACAGAATAGAGAGCCCAGAAATAGATC	0.117485	0
DNA	1	chr22	36936374	-	3	CCAGCAAAGTGAGGCCCAGAGAGG	CCAGCAAAGTGAGGCCCAGAGAGG	GCAGCATAGTGAG-CCCAGAANRG	GCAGCATAGTGAGCCCAGAANRG				0	0	0	0	46.05	0	0	0	CACCAGCAAAGTGAGGCCCAGAGAGGGGC	0.211517	0
DNA	1	chr22	45602423	-	3	CCAGCTTTGCTGAGCCCAGAACGG	CCAGCTTTGCTGAGCCCAGAACGG	GCAGCATAG-TGAGCCCAGAANRG	GCAGCATAGTGAGCCCAGAANRG				0	0	0	0	46.6	0	0	0	AACCAGCTTTGCTGAGCCCAGAACGGCCT	0.165868	0
DNA	1	chr22	34571885	-	3	ACAGAATAGAGAGCCCAGAAATAG	ACAGAATAGAGAGCCCAGAAATAG	GCAGCATAGTGAGCCCAG-AANRG	GCAGCATAGTGAGCCCAGAANRG				0	0	0	0	41.89	0	0	0	GAACAGAATAGAGAGCCCAGAAATAGACC	0.117788	0
DNA	1	chr22	30900599	+	3	ACAGATTAGTGAGCCCAGAAACAG	ACAGATTAGTGAGCCCAGAAACAG	GCAGCATAGTGAGCCCAG-AANRG	GCAGCATAGTGAGCCCAGAANRG				0	0	0	0	42.18	0	0	0	GGAACAGATTAGTGAGCCCAGAAACAGAC	0.410288	0
DNA	1	chr22	28057915	-	2	GCAGAATAGAGAGCCCAGAAATAG	GCAGAATAGAGAGCCCAGAAATAG	GCAGCATAGTGAGCCCAG-AANRG	GCAGCATAGTGAGCCCAGAANRG				0	0	0	0	42.01	0	0	0	GAGCAGAATAGAGAGCCCAGAAATAGACC	0.28649	0
DNA	1	chr22	49130878	-	3	ACAGAATAGAGAGCCCAGAAATAG	ACAGAATAGAGAGCCCAGAAATAG	GCAGCATAGTGAGCCCAG-AANRG	GCAGCATAGTGAGCCCAGAANRG				0	0	0	0	41.89	0	0	0	GAACAGAATAGAGAGCCCAGAAATAGATC	0.117485	0
DNA	1	chr22	49222910	+	2	GCAGAATAGAGAGCCCAGAAAGAG	GCAGAATAGAGAGCCCAGAAAGAG	GCAGCATAGTGAGCCCAG-AANRG	GCAGCATAGTGAGCCCAGAANRG				0	0	0	0	42.01	0	0	0	GGAGCAGAATAGAGAGCCCAGAAAGAGAC	0.565929	0
DNA	1	chr22	34816580	+	3	GGAGCATCAGTGAGGCCAGAAAGG	GGAGCATCAGTGAGGCCAGAAAGG	GCAGCA-TAGTGAGCCCAGAANRG	GCAGCATAGTGAGCCCAGAANRG				0	0	0	0	45.17	0	0	0	TGAGGAGCATCAGTGAGGCCAGAAAGGCT	0.10431	0
DNA	1	chr22	49222910	+	3	GCAGAATAGAGAGCCCAGAAAGAG	GCAGAATAGAGAGCCCAGAAAGAG	GCAGCATAGTGAGCCCA-GAANRG	GCAGCATAGTGAGCCCAGAANRG				0	0	0	0	38.01	0	0	0	GGAGCAGAATAGAGAGCCCAGAAAGAGAC	0.565929	0
DNA	1	chr22	28057915	-	3	GCAGAATAGAGAGCCCAGAAATAG	GCAGAATAGAGAGCCCAGAAATAG	GCAGCATAGTGAGCCCA-GAANRG	GCAGCATAGTGAGCCCAGAANRG				0	0	0	0	38.01	0	0	0	GAGCAGAATAGAGAGCCCAGAAATAGACC	0.28649	0
DNA	1	chr22	21554704	-	3	GCAGCATGGTGAGCTCATGCAGGG	GCAGCATGGTGAGCTCATGCAGGG	GCAGCATAGTGAGCCCA-GAANRG	GCAGCATAGTGAGCCCAGAANRG				0	0	0	0	35.53	0	0	0	CAGCAGCATGGTGAGCTCATGCAGGGACT	0.207734	0
DNA	1	chr22	21380110	+	3	GCAGCATGGTGAGCTCATGCAGGG	GCAGCATGGTGAGCTCATGCAGGG	GCAGCATAGTGAGCCCA-GAANRG	GCAGCATAGTGAGCCCAGAANRG				0	0	0	0	35.53	0	0	0	GCAGCAGCATGGTGAGCTCATGCAGGGAC	0.111044	0
DNA	1	chr22	18615147	-	3	GCAGCATGGTGAGCTCATGCAGGG	GCAGCATGGTGAGCTCATGCAGGG	GCAGCATAGTGAGCCCA-GAANRG	GCAGCATAGTGAGCCCAGAANRG				0	0	0	0	35.53	0	0	0	CAGCAGCATGGTGAGCTCATGCAGGGACT	0.207734	0
RNA	1	chr22	49222910	+	2	GCAGAATAGAGAGCCCAG-AAAG	GCAGAATAGAGAGCCCAGAAAG	GCAGCATAGTGAGCCCAGAANRG	GCAGCATAGTGAGCCCAGAANRG				0	0	0	0	42.2	0	0	0	GGAGCAGAATAGAGAGCCCAGAAAGAGAC	0.565929	0
DNA	1	chr22	27900930	+	3	GAAGCTTAGAGAGCCTCAGAAAAG	GAAGCTTAGAGAGCCTCAGAAAAG	GCAGCATAGTGAGCC-CAGAANRG	GCAGCATAGTGAGCCCAGAANRG				0	0	0	0	44.56	0	0	0	TTGGAAGCTTAGAGAGCCTCAGAAAAGGA	0.0878043	0
DNA	1	chr22	12583332	+	3	TCAGCAAACTGAGCCTCAGAAGAG	TCAGCAAACTGAGCCTCAGAAGAG	GCAGCATAGTGAGCC-CAGAANRG	GCAGCATAGTGAGCCCAGAANRG				0	0	0	0	44.7	0	0	0	AGATCAGCAAACTGAGCCTCAGAAGAGTT	0.109481	0
DNA	1	chr22	12281422	-	3	TCAGCAAACTGAGCCTCAGAAGAG	TCAGCAAACTGAGCCTCAGAAGAG	GCAGCATAGTGAGCC-CAGAANRG	GCAGCATAGTGAGCCCAGAANRG				0	0	0	0	44.7	0	0	0	GATCAGCAAACTGAGCCTCAGAAGAGTTA	0.0793114	0
DNA	1	chr22	34816580	+	3	GGAGCATCAGTGAGGCCAGAAAGG	GGAGCATCAGTGAGGCCAGAAAGG	GCAGCATA-GTGAGCCCAGAANRG	GCAGCATAGTGAGCCCAGAANRG				0	0	0	0	45.05	0	0	0	TGAGGAGCATCAGTGAGGCCAGAAAGGCT	0.10431	0
DNA	1	chr22	26782534	+	3	GCAACAGACGTGAGCCCAGCATGG	GCAACAGACGTGAGCCCAGCATGG	GCAGCATA-GTGAGCCCAGAANRG	GCAGCATAGTGAGCCCAGAANRG				0	0	0	0	40.95	0	0	0	CGTGCAACAGACGTGAGCCCAGCATGGTG	0.131666	0
DNA	1	chr15	99194419	+	3	ACAGAATAGAGAGCCCAGAAATAG	ACAGAATAGAGAGCCCAGAAATAG	GCAGCATAGTGAGCCCAG-AANRG	GCAGCATAGTGAGCCCAGAANRG				0	0	0	0	41.89	0	0	0	GGAACAGAATAGAGAGCCCAGAAATAGGC	0.456037	0
DNA	1	chr15	89036941	-	3	ACAGAATAGAGAGCCCAGAAACAG	ACAGAATAGAGAGCCCAGAAACAG	GCAGCATAGTGAGCCCAG-AANRG	GCAGCATAGTGAGCCCAGAANRG				0	0	0	0	41.89	0	0	0	GAACAGAATAGAGAGCCCAGAAACAGACC	0.133786	0
DNA	1	chr15	63348534	-	3	GCAGTATTGTGAGCACAGAAAAGG	GCAGTATTGTGAGCACAGAAAAGG	GCAGCATAGTGAGCCCAG-AANRG	GCAGCATAGTGAGCCCAGAANRG				0	0	0	0	40.34	0	0	0	AGGCAGTATTGTGAGCACAGAAAAGGCTG	0.19131	0
DNA	1	chr15	46542497	-	3	ACAGAATAGAGAGCCCAGAAATAG	ACAGAATAGAGAGCCCAGAAATAG	GCAGCATAGTGAGCCCAG-AANRG	GCAGCATAGTGAGCCCAGAANRG				0	0	0	0	41.89	0	0	0	GTACAGAATAGAGAGCCCAGAAATAGACT	0.121964	0
DNA	1	chr15	26424852	-	3	ACAGAATAGAGAGCCCAGAAATGG	ACAGAATAGAGAGCCCAGAAATGG	GCAGCATAGTGAGCCCAG-AANRG	GCAGCATAGTGAGCCCAGAANRG				0	0	0	0	41.89	0	0	0	GAACAGAATAGAGAGCCCAGAAATGGACC	0.199634	0
DNA	1	chr15	25389126	+	3	ACAGAATAGAGAGCCCAGAAATGG	ACAGAATAGAGAGCCCAGAAATGG	GCAGCATAGTGAGCCCAG-AANRG	GCAGCATAGTGAGCCCAGAANRG				0	0	0	0	41.89	0	0	0	GAAACAGAATAGAGAGCCCAGAAATGGAC	0.452846	0
DNA	1	chr15	25153121	+	3	ACAGAATAGAGAGCCCAGAAATAG	ACAGAATAGAGAGCCCAGAAATAG	GCAGCATAGTGAGCCCAG-AANRG	GCAGCATAGTGAGCCCAGAANRG				0	0	0	0	41.89	0	0	0	AGTACAGAATAGAGAGCCCAGAAATAGAC	0.458447	0
DNA	1	chr15	88584353	+	3	ACAGCATAGAGAGCCCCAAAATAG	ACAGCATAGAGAGCCCCAAAATAG	GCAGCATAGTGAGC-CCAGAANRG	GCAGCATAGTGAGCCCAGAANRG				0	0	0	0	40.18	0	0	0	GGAACAGCATAGAGAGCCCCAAAATAGAC	0.37725	0
DNA	1	chr15	45332111	+	3	ACAGCATCAGTGATCACAGAAAAG	ACAGCATCAGTGATCACAGAAAAG	GCAGCAT-AGTGAGCCCAGAANRG	GCAGCATAGTGAGCCCAGAANRG				0	0	0	0	43.71	0	0	0	ACCACAGCATCAGTGATCACAGAAAAGAA	0.0957893	0
DNA	1	chr15	88584353	+	3	ACAGCATAGAGAGCCCCAAAATAG	ACAGCATAGAGAGCCCCAAAATAG	GCAGCATAGTGAG-CCCAGAANRG	GCAGCATAGTGAGCCCAGAANRG				0	0	0	0	40.78	0	0	0	GGAACAGCATAGAGAGCCCCAAAATAGAC	0.37725	0
RNA	1	chr15	75191322	-	2	GCAGCATT-TGACCCCAGAATGG	GCAGCATTTGACCCCAGAATGG	GCAGCATAGTGAGCCCAGAANRG	GCAGCATAGTGAGCCCAGAANRG				0	0	0	0	46.17	0	0	0	TGCAGCAGCATTTGACCCCAGAATGGGCC	0.305088	0
RNA	1	chr15	73848109	+	2	GCAGC-TTGTAAGCCCAGAAAGG	GCAGCTTGTAAGCCCAGAAAGG	GCAGCATAGTGAGCCCAGAANRG	GCAGCATAGTGAGCCCAGAANRG				0	0	0	0	46.71	0	0	0	GGGGCAGCTTGTAAGCCCAGAAAGGGCAT	0.200926	0
RNA	1	chr15	68331511	+	2	G-AGAAGAGTGAGCCCAGAAGGG	GAGAAGAGTGAGCCCAGAAGGG	GCAGCATAGTGAGCCCAGAANRG	GCAGCATAGTGAGCCCAGAANRG				0	0	0	0	47.34	0	0	0	CCAGAGAAGAGTGAGCCCAGAAGGGATGC	0.100142	0
DNA	1	chr15	80295142	+	3	GCAGCCATGGGTAGCCCAGAAGAG	GCAGCCATGGGTAGCCCAGAAGAG	GCAGC-ATAGTGAGCCCAGAANRG	GCAGCATAGTGAGCCCAGAANRG				0	0	0	0	45.64	0	0	0	TGGGCAGCCATGGGTAGCCCAGAAGAGGC	0.125694	0
DNA	1	chr15	52176773	+	3	GCAGGCAGAGTGAGCCCAGTAAAG	GCAGGCAGAGTGAGCCCAGTAAAG	GCAGC-ATAGTGAGCCCAGAANRG	GCAGCATAGTGAGCCCAGAANRG				0	0	0	0	41.03	0	0	0	ATGGCAGGCAGAGTGAGCCCAGTAAAGCA	0.12649	0
DNA	1	chr15	50082545	-	3	GAAGCTATAGTGAGCCCTGGAAGG	GAAGCTATAGTGAGCCCTGGAAGG	GCAGC-ATAGTGAGCCCAGAANRG	GCAGCATAGTGAGCCCAGAANRG				0	0	0	0	37.36	0	0	0	GTGAAGCTATAGTGAGCCCTGGAAGGAAT	0.167218	0
DNA	1	chr15	43409155	+	3	GCAGCCATAATGAGCCATGAAGAG	GCAGCCATAATGAGCCATGAAGAG	GCAGC-ATAGTGAGCCCAGAANRG	GCAGCATAGTGAGCCCAGAANRG				0	0	0	0	39.99	0	0	0	GCAGCAGCCATAATGAGCCATGAAGAGCA	0.116418	0
RNA	1	chr15	75191322	-	2	GCAGCAT-TTGACCCCAGAATGG	GCAGCATTTGACCCCAGAATGG	GCAGCATAGTGAGCCCAGAANRG	GCAGCATAGTGAGCCCAGAANRG				0	0	0	0	46.17	0	0	0	TGCAGCAGCATTTGACCCCAGAATGGGCC	0.305088	0
RNA	1	chr15	73848109	+	2	GCAGCTT-GTAAGCCCAGAAAGG	GCAGCTTGTAAGCCCAGAAAGG	GCAGCATAGTGAGCCCAGAANRG	GCAGCATAGTGAGCCCAGAANRG				0	0	0	0	46.71	0	0	0	GGGGCAGCTTGTAAGCCCAGAAAGGGCAT	0.200926	0
DNA	1	chr15	25670500	-	3	GCCGCATAGTGATCCCTTGAAAGG	GCCGCATAGTGATCCCTTGAAAGG	GCAGCATAGTGAGCCCA-GAANRG	GCAGCATAGTGAGCCCAGAANRG				0	0	0	0	39.45	0	0	0	CAGCCGCATAGTGATCCCTTGAAAGGAAG	0.159665	0
RNA	1	chr15	92469456	+	2	GGAGCAGAGTGAGCCCAG-AGAG	GGAGCAGAGTGAGCCCAGAGAG	GCAGCATAGTGAGCCCAGAANRG	GCAGCATAGTGAGCCCAGAANRG				0	0	0	0	42.53	0	0	0	CCAGGAGCAGAGTGAGCCCAGAGAGCTGA	0.445605	0
DNA	1	chr15	92627340	+	3	GCAGTCATTGTCAGCCTAGAAAAG	GCAGTCATTGTCAGCCTAGAAAAG	GCAG-CATAGTGAGCCCAGAANRG	GCAGCATAGTGAGCCCAGAANRG				0	0	0	0	43.36	0	0	0	ATGGCAGTCATTGTCAGCCTAGAAAAGGA	0.0864123	0
DNA	1	chr15	80295142	+	3	GCAGCCATGGGTAGCCCAGAAGAG	GCAGCCATGGGTAGCCCAGAAGAG	GCAG-CATAGTGAGCCCAGAANRG	GCAGCATAGTGAGCCCAGAANRG				0	0	0	0	45.66	0	0	0	TGGGCAGCCATGGGTAGCCCAGAAGAGGC	0.125694	0
DNA	1	chr15	52176773	+	2	GCAGGCAGAGTGAGCCCAGTAAAG	GCAGGCAGAGTGAGCCCAGTAAAG	GCAG-CATAGTGAGCCCAGAANRG	GCAGCATAGTGAGCCCAGAANRG				0	0	0	0	41.24	0	0	0	ATGGCAGGCAGAGTGAGCCCAGTAAAGCA	0.12649	0
DNA	1	chr15	47010101	+	3	GCAGACAAAGTGAGCTCACAACAG	GCAGACAAAGTGAGCTCACAACAG	GCAG-CATAGTGAGCCCAGAANRG	GCAGCATAGTGAGCCCAGAANRG				0	0	0	0	39.94	0	0	0	GTTGCAGACAAAGTGAGCTCACAACAGAA	0.104452	0
DNA	1	chr15	43409155	+	3	GCAGCCATAATGAGCCATGAAGAG	GCAGCCATAATGAGCCATGAAGAG	GCAG-CATAGTGAGCCCAGAANRG	GCAGCATAGTGAGCCCAGAANRG				0	0	0	0	40.01	0	0	0	GCAGCAGCCATAATGAGCCATGAAGAGCA	0.116418	0
DNA	1	chr15	99194419	+	3	ACAGAATAGAGAGCCCAGAAATAG	ACAGAATAGAGAGCCCAGAAATAG	GCAGCATAGTGAGCCCAGA-ANRG	GCAGCATAGTGAGCCCAGAANRG				0	0	0	0	40.89	0	0	0	GGAACAGAATAGAGAGCCCAGAAATAGGC	0.456037	0
DNA	1	chr15	89036941	-	3	ACAGAATAGAGAGCCCAGAAACAG	ACAGAATAGAGAGCCCAGAAACAG	GCAGCATAGTGAGCCCAGA-ANRG	GCAGCATAGTGAGCCCAGAANRG				0	0	0	0	40.89	0	0	0	GAACAGAATAGAGAGCCCAGAAACAGACC	0.133786	0
DNA	1	chr15	63348534	-	3	GCAGTATTGTGAGCACAGAAAAGG	GCAGTATTGTGAGCACAGAAAAGG	GCAGCATAGTGAGCCCAGA-ANRG	GCAGCATAGTGAGCCCAGAANRG				0	0	0	0	39.34	0	0	0	AGGCAGTATTGTGAGCACAGAAAAGGCTG	0.19131	0
DNA	1	chr15	61111079	+	3	GCAGAAAAGTGAGACCAGAGATAG	GCAGAAAAGTGAGACCAGAGATAG	GCAGCATAGTGAGCCCAGA-ANRG	GCAGCATAGTGAGCCCAGAANRG				0	0	0	0	39.98	0	0	0	TCTGCAGAAAAGTGAGACCAGAGATAGTG	0.273562	0
DNA	1	chr15	46542497	-	3	ACAGAATAGAGAGCCCAGAAATAG	ACAGAATAGAGAGCCCAGAAATAG	GCAGCATAGTGAGCCCAGA-ANRG	GCAGCATAGTGAGCCCAGAANRG				0	0	0	0	40.89	0	0	0	GTACAGAATAGAGAGCCCAGAAATAGACT	0.121964	0
DNA	1	chr15	26424852	-	3	ACAGAATAGAGAGCCCAGAAATGG	ACAGAATAGAGAGCCCAGAAATGG	GCAGCATAGTGAGCCCAGA-ANRG	GCAGCATAGTGAGCCCAGAANRG				0	0	0	0	40.89	0	0	0	GAACAGAATAGAGAGCCCAGAAATGGACC	0.199634	0
DNA	1	chr15	25389126	+	3	ACAGAATAGAGAGCCCAGAAATGG	ACAGAATAGAGAGCCCAGAAATGG	GCAGCATAGTGAGCCCAGA-ANRG	GCAGCATAGTGAGCCCAGAANRG				0	0	0	0	40.89	0	0	0	GAAACAGAATAGAGAGCCCAGAAATGGAC	0.452846	0
DNA	1	chr15	25153121	+	3	ACAGAATAGAGAGCCCAGAAATAG	ACAGAATAGAGAGCCCAGAAATAG	GCAGCATAGTGAGCCCAGA-ANRG	GCAGCATAGTGAGCCCAGAANRG				0	0	0	0	40.89	0	0	0	AGTACAGAATAGAGAGCCCAGAAATAGAC	0.458447	0
DNA	1	chr15	69057502	-	3	GCCAGCATACAGAGCCCAGAGAGG	GCCAGCATACAGAGCCCAGAGAGG	GC-AGCATAGTGAGCCCAGAANRG	GCAGCATAGTGAGCCCAGAANRG				0	0	0	0	46.35	0	0	0	AGGCCAGCATACAGAGCCCAGAGAGGCTC	0.382205	0
DNA	1	chr15	68411981	+	3	GCAAGCCCAGTGAGCCCAGCAGAG	GCAAGCCCAGTGAGCCCAGCAGAG	GC-AGCATAGTGAGCCCAGAANRG	GCAGCATAGTGAGCCCAGAANRG				0	0	0	0	41.05	0	0	0	CAAGCAAGCCCAGTGAGCCCAGCAGAGCC	0.150127	0
DNA	1	chr15	52176773	+	3	GCAGGCAGAGTGAGCCCAGTAAAG	GCAGGCAGAGTGAGCCCAGTAAAG	GC-AGCATAGTGAGCCCAGAANRG	GCAGCATAGTGAGCCCAGAANRG				0	0	0	0	41.11	0	0	0	ATGGCAGGCAGAGTGAGCCCAGTAAAGCA	0.12649	0
RNA	1	chr15	41982164	+	2	GGAGCATGGTG-GCCCAGAAAGG	GGAGCATGGTGGCCCAGAAAGG	GCAGCATAGTGAGCCCAGAANRG	GCAGCATAGTGAGCCCAGAANRG				0	0	0	0	46.69	0	0	0	TAGGGAGCATGGTGGCCCAGAAAGGGGAC	0.187095	0
DNA	1	chr15	88584353	+	3	ACAGCATAGAGAGCCCCAAAATAG	ACAGCATAGAGAGCCCCAAAATAG	GCAGCATAGTGAGCCC-AGAANRG	GCAGCATAGTGAGCCCAGAANRG				0	0	0	0	39.08	0	0	0	GGAACAGCATAGAGAGCCCCAAAATAGAC	0.37725	0
DNA	1	chr15	25670500	-	3	GCCGCATAGTGATCCCTTGAAAGG	GCCGCATAGTGATCCCTTGAAAGG	GCAGCATAGTGAGCCC-AGAANRG	GCAGCATAGTGAGCCCAGAANRG				0	0	0	0	39.45	0	0	0	CAGCCGCATAGTGATCCCTTGAAAGGAAG	0.159665	0
DNA	1	chr19	55167771	-	3	GCAGCAGACTGAGGCTCAGAAAGG	GCAGCAGACTGAGGCTCAGAAAGG	GCAGCATAGTGA-GCCCAGAANRG	GCAGCATAGTGAGCCCAGAANRG				0	0	0	0	43.72	0	0	0	GAGCAGCAGACTGAGGCTCAGAAAGGGTG	0.192815	0
RNA	1	chr21	42770301	-	2	GCAGCGTAG-GAGCCCAGGAAGG	GCAGCGTAGGAGCCCAGGAAGG	GCAGCATAGTGAGCCCAGAANRG	GCAGCATAGTGAGCCCAGAANRG				0	0	0	0	42.18	0	0	0	ATGCGCAGCGTAGGAGCCCAGGAAGGTCG	0.281551	0
DNA	1	chr21	6026688	-	3	GCTGCATAGGACAGCCCAGAAGAG	GCTGCATAGGACAGCCCAGAAGAG	GCAGCATAG-TGAGCCCAGAANRG	GCAGCATAGTGAGCCCAGAANRG				0	0	0	0	45.55	0	0	0	CAGCTGCATAGGACAGCCCAGAAGAGGCA	0.11197	0
DNA	1	chr21	43511854	+	3	GCTGCATAGGACAGCCCAGAAGAG	GCTGCATAGGACAGCCCAGAAGAG	GCAGCATAG-TGAGCCCAGAANRG	GCAGCATAGTGAGCCCAGAANRG				0	0	0	0	45.55	0	0	0	GCAGCTGCATAGGACAGCCCAGAAGAGGC	0.117326	0
RNA	1	chr21	46648586	-	2	GC-GCATAGTGTGCACAGAAGAG	GCGCATAGTGTGCACAGAAGAG	GCAGCATAGTGAGCCCAGAANRG	GCAGCATAGTGAGCCCAGAANRG				0	0	0	0	45.04	0	0	0	GGCCGCGCATAGTGTGCACAGAAGAGACT	0.195569	0
RNA	1	chr21	39551529	-	2	G-AGCAAAGTGATCCCAGAAAAG	GAGCAAAGTGATCCCAGAAAAG	GCAGCATAGTGAGCCCAGAANRG	GCAGCATAGTGAGCCCAGAANRG				0	0	0	0	46.43	0	0	0	TTGTGAGCAAAGTGATCCCAGAAAAGAGA	0.158731	0
DNA	1	chr19	15979176	+	3	GCAGCATCAGGGAGCCCAGAAGAG	GCAGCATCAGGGAGCCCAGAAGAG	GCAGCATAGT-GAGCCCAGAANRG	GCAGCATAGTGAGCCCAGAANRG				0	0	0	0	45.88	0	0	0	TGGGCAGCATCAGGGAGCCCAGAAGAGAA	0.149598	0
DNA	1	chr19	44617950	+	3	GCAGCAGAGTGGAGCAGAGAAGGG	GCAGCAGAGTGGAGCAGAGAAGGG	GCAGCATAGT-GAGCCCAGAANRG	GCAGCATAGTGAGCCCAGAANRG				0	0	0	0	41.47	0	0	0	CAGGCAGCAGAGTGGAGCAGAGAAGGGTA	0.139638	0
DNA	1	chr19	55167771	-	3	GCAGCAGACTGAGGCTCAGAAAGG	GCAGCAGACTGAGGCTCAGAAAGG	GCAGCATAGTGAGCC-CAGAANRG	GCAGCATAGTGAGCCCAGAANRG				0	0	0	0	43.52	0	0	0	GAGCAGCAGACTGAGGCTCAGAAAGGGTG	0.192815	0
DNA	1	chr21	45287037	-	3	GCAGCCTCGGGAGCCCAGGAAGGG	GCAGCCTCGGGAGCCCAGGAAGGG	GCAGCATAGTGAGCCCA-GAANRG	GCAGCATAGTGAGCCCAGAANRG				0	0	0	0	42.72	0	0	0	GCGCAGCCTCGGGAGCCCAGGAAGGGGGC	0.220435	0
DNA	1	chr21	44773702	+	2	GCAGCCAAGTGAGCCCAGGAATGG	GCAGCCAAGTGAGCCCAGGAATGG	GCAGCATAGTGAGCCCA-GAANRG	GCAGCATAGTGAGCCCAGAANRG				0	0	0	0	43.26	0	0	0	GAGGCAGCCAAGTGAGCCCAGGAATGGTG	0.584804	0
DNA	1	chr21	43511854	+	3	GCTGCATAGGACAGCCCAGAAGAG	GCTGCATAGGACAGCCCAGAAGAG	GCAGCATAGT-GAGCCCAGAANRG	GCAGCATAGTGAGCCCAGAANRG				0	0	0	0	45.55	0	0	0	GCAGCTGCATAGGACAGCCCAGAAGAGGC	0.117326	0
DNA	1	chr21	6026688	-	3	GCTGCATAGGACAGCCCAGAAGAG	GCTGCATAGGACAGCCCAGAAGAG	GCAGCATAGT-GAGCCCAGAANRG	GCAGCATAGTGAGCCCAGAANRG				0	0	0	0	45.55	0	0	0	CAGCTGCATAGGACAGCCCAGAAGAGGCA	0.11197	0
DNA	1	chr21	43511854	+	3	GCTGCATAGGACAGCCCAGAAGAG	GCTGCATAGGACAGCCCAGAAGAG	GCAGCATA-GTGAGCCCAGAANRG	GCAGCATAGTGAGCCCAGAANRG				0	0	0	0	45.7	0	0	0	GCAGCTGCATAGGACAGCCCAGAAGAGGC	0.117326	0
DNA	1	chr21	6026688	-	3	GCTGCATAGGACAGCCCAGAAGAG	GCTGCATAGGACAGCCCAGAAGAG	GCAGCATA-GTGAGCCCAGAANRG	GCAGCATAGTGAGCCCAGAANRG				0	0	0	0	45.7	0	0	0	CAGCTGCATAGGACAGCCCAGAAGAGGCA	0.11197	0
DNA	1	chr21	6026688	-	3	GCTGCATAGGACAGCCCAGAAGAG	GCTGCATAGGACAGCCCAGAAGAG	GCAGCATAGTG-AGCCCAGAANRG	GCAGCATAGTGAGCCCAGAANRG				0	0	0	0	45.55	0	0	0	CAGCTGCATAGGACAGCCCAGAAGAGGCA	0.11197	0
DNA	1	chr21	43511854	+	3	GCTGCATAGGACAGCCCAGAAGAG	GCTGCATAGGACAGCCCAGAAGAG	GCAGCATAGTG-AGCCCAGAANRG	GCAGCATAGTGAGCCCAGAANRG				0	0	0	0	45.55	0	0	0	GCAGCTGCATAGGACAGCCCAGAAGAGGC	0.117326	0
DNA	1	chr21	39551529	-	3	GTGAGCAAAGTGATCCCAGAAAAG	GTGAGCAAAGTGATCCCAGAAAAG	G-CAGCATAGTGAGCCCAGAANRG	GCAGCATAGTGAGCCCAGAANRG				0	0	0	0	45.85	0	0	0	TTGTGAGCAAAGTGATCCCAGAAAAGAGA	0.158731	0
DNA	1	chr21	45287037	-	3	GCAGCCTCGGGAGCCCAGGAAGGG	GCAGCCTCGGGAGCCCAGGAAGGG	GCAGCATAGTGAGCCCAG-AANRG	GCAGCATAGTGAGCCCAGAANRG				0	0	0	0	41.72	0	0	0	GCGCAGCCTCGGGAGCCCAGGAAGGGGGC	0.220435	0
DNA	1	chr21	45236865	+	3	GCAGAATAGAGAGCCCAGAAGTAG	GCAGAATAGAGAGCCCAGAAGTAG	GCAGCATAGTGAGCCCAG-AANRG	GCAGCATAGTGAGCCCAGAANRG				0	0	0	0	42.01	0	0	0	GGAGCAGAATAGAGAGCCCAGAAGTAGAC	0.681623	0
DNA	1	chr21	45044920	+	3	ACAGAATAGAGAGCCCAGAAATAG	ACAGAATAGAGAGCCCAGAAATAG	GCAGCATAGTGAGCCCAG-AANRG	GCAGCATAGTGAGCCCAGAANRG				0	0	0	0	41.89	0	0	0	TGGACAGAATAGAGAGCCCAGAAATAGAC	0.452952	0
DNA	1	chr21	44773702	+	2	GCAGCCAAGTGAGCCCAGGAATGG	GCAGCCAAGTGAGCCCAGGAATGG	GCAGCATAGTGAGCCCAG-AANRG	GCAGCATAGTGAGCCCAGAANRG				0	0	0	0	42.26	0	0	0	GAGGCAGCCAAGTGAGCCCAGGAATGGTG	0.584804	0
DNA	1	chr21	39782153	-	3	ACAGAATAGAGAGCCCAGAAAGAG	ACAGAATAGAGAGCCCAGAAAGAG	GCAGCATAGTGAGCCCAG-AANRG	GCAGCATAGTGAGCCCAGAANRG				0	0	0	0	41.89	0	0	0	GAACAGAATAGAGAGCCCAGAAAGAGACC	0.125926	0
DNA	1	chr21	33220755	-	3	ACAGAATAGAGAGCCCAGAAATAG	ACAGAATAGAGAGCCCAGAAATAG	GCAGCATAGTGAGCCCAG-AANRG	GCAGCATAGTGAGCCCAGAANRG				0	0	0	0	41.89	0	0	0	AAACAGAATAGAGAGCCCAGAAATAGACC	0.116496	0
DNA	1	chr21	44773702	+	3	GCAGCCAAGTGAGCCCAGGAATGG	GCAGCCAAGTGAGCCCAGGAATGG	GCAGCATAGTGAGCCC-AGAANRG	GCAGCATAGTGAGCCCAGAANRG				0	0	0	0	40.26	0	0	0	GAGGCAGCCAAGTGAGCCCAGGAATGGTG	0.584804	0
DNA	1	chr21	39551529	-	3	GTGAGCAAAGTGATCCCAGAAAAG	GTGAGCAAAGTGATCCCAGAAAAG	GC-AGCATAGTGAGCCCAGAANRG	GCAGCATAGTGAGCCCAGAANRG				0	0	0	0	45.85	0	0	0	TTGTGAGCAAAGTGATCCCAGAAAAGAGA	0.158731	0
DNA	1	chr21	45044920	+	3	ACAGAATAGAGAGCCCAGAAATAG	ACAGAATAGAGAGCCCAGAAATAG	GCAGCATAGTGAGCCCAGA-ANRG	GCAGCATAGTGAGCCCAGAANRG				0	0	0	0	40.89	0	0	0	TGGACAGAATAGAGAGCCCAGAAATAGAC	0.452952	0
DNA	1	chr21	44773702	+	3	GCAGCCAAGTGAGCCCAGGAATGG	GCAGCCAAGTGAGCCCAGGAATGG	GCAGCATAGTGAGCCCAGA-ANRG	GCAGCATAGTGAGCCCAGAANRG				0	0	0	0	36.26	0	0	0	GAGGCAGCCAAGTGAGCCCAGGAATGGTG	0.584804	0
DNA	1	chr21	39782153	-	3	ACAGAATAGAGAGCCCAGAAAGAG	ACAGAATAGAGAGCCCAGAAAGAG	GCAGCATAGTGAGCCCAGA-ANRG	GCAGCATAGTGAGCCCAGAANRG				0	0	0	0	40.89	0	0	0	GAACAGAATAGAGAGCCCAGAAAGAGACC	0.125926	0
DNA	1	chr21	33220755	-	3	ACAGAATAGAGAGCCCAGAAATAG	ACAGAATAGAGAGCCCAGAAATAG	GCAGCATAGTGAGCCCAGA-ANRG	GCAGCATAGTGAGCCCAGAANRG				0	0	0	0	40.89	0	0	0	AAACAGAATAGAGAGCCCAGAAATAGACC	0.116496	0
DNA	1	chr21	45236865	+	3	GCAGAATAGAGAGCCCAGAAGTAG	GCAGAATAGAGAGCCCAGAAGTAG	GCAGCATAGTGAGCCCAGA-ANRG	GCAGCATAGTGAGCCCAGAANRG				0	0	0	0	41.01	0	0	0	GGAGCAGAATAGAGAGCCCAGAAGTAGAC	0.681623	0
DNA	1	chrX	139382204	+	3	GCAGCCATAGGCTGCCCAGAAGAG	GCAGCCATAGGCTGCCCAGAAGAG	GCAG-CATAGTGAGCCCAGAANRG	GCAGCATAGTGAGCCCAGAANRG				0	0	0	0	44.91	0	0	0	TGGGCAGCCATAGGCTGCCCAGAAGAGGG	0.122592	0
DNA	1	chrX	94304622	-	3	GCTTGCATCTTGAGCCCAGAAAAG	GCTTGCATCTTGAGCCCAGAAAAG	GC-AGCATAGTGAGCCCAGAANRG	GCAGCATAGTGAGCCCAGAANRG				0	0	0	0	46.53	0	0	0	CAGCTTGCATCTTGAGCCCAGAAAAGCCA	0.163419	0
DNA	1	chrX	90096021	+	3	GCTTGCATAGTGTACCCAGAAAAG	GCTTGCATAGTGTACCCAGAAAAG	GC-AGCATAGTGAGCCCAGAANRG	GCAGCATAGTGAGCCCAGAANRG				0	0	0	0	44.98	0	0	0	AAAGCTTGCATAGTGTACCCAGAAAAGCT	0.0910158	0
DNA	1	chrX	20071665	+	3	TCAGCAGAGTGAGCCCCAAAACAG	TCAGCAGAGTGAGCCCCAAAACAG	GCAGCATAGTGAGCCC-AGAANRG	GCAGCATAGTGAGCCCAGAANRG				0	0	0	0	39.35	0	0	0	AGCTCAGCAGAGTGAGCCCCAAAACAGTC	0.212826	0
DNA	1	chrX	64571182	-	3	GCAGCAGAAAGAGCCCAGACATGG	GCAGCAGAAAGAGCCCAGACATGG	GCAGCATAGTGAGCCCAGA-ANRG	GCAGCATAGTGAGCCCAGAANRG				0	0	0	0	40.62	0	0	0	GAGCAGCAGAAAGAGCCCAGACATGGGAG	0.208303	0
DNA	1	chrX	53656856	+	3	GCAGAATAGAGAACCCAGAAATAG	GCAGAATAGAGAACCCAGAAATAG	GCAGCATAGTGAGCCCAGA-ANRG	GCAGCATAGTGAGCCCAGAANRG				0	0	0	0	39.91	0	0	0	AGAGCAGAATAGAGAACCCAGAAATAGAC	0.450536	0
DNA	1	chrX	52137960	+	3	ACAGAATAGAGAGCCCAGAAATAG	ACAGAATAGAGAGCCCAGAAATAG	GCAGCATAGTGAGCCCAGA-ANRG	GCAGCATAGTGAGCCCAGAANRG				0	0	0	0	40.89	0	0	0	GGAACAGAATAGAGAGCCCAGAAATAGAC	0.453381	0
DNA	1	chrX	45493295	-	3	GCAGAATAGAGAACCCAGAAACAG	GCAGAATAGAGAACCCAGAAACAG	GCAGCATAGTGAGCCCAGA-ANRG	GCAGCATAGTGAGCCCAGAANRG				0	0	0	0	39.91	0	0	0	GAGCAGAATAGAGAACCCAGAAACAGATC	0.125677	0
DNA	1	chrX	33280754	-	3	ACAGAATAGAGAGCCCAGAAATAG	ACAGAATAGAGAGCCCAGAAATAG	GCAGCATAGTGAGCCCAGA-ANRG	GCAGCATAGTGAGCCCAGAANRG				0	0	0	0	40.89	0	0	0	AAACAGAATAGAGAGCCCAGAAATAGATC	0.117623	0
DNA	1	chrX	21075933	-	3	CCAGCCTAGTGAGTCCAGACATAG	CCAGCCTAGTGAGTCCAGACATAG	GCAGCATAGTGAGCCCAGA-ANRG	GCAGCATAGTGAGCCCAGAANRG				0	0	0	0	40.07	0	0	0	ACCCAGCCTAGTGAGTCCAGACATAGACT	0.123244	0
DNA	1	chrX	1943825	+	3	ACAGCATAGAGAACCCAGAAACAG	ACAGCATAGAGAACCCAGAAACAG	GCAGCATAGTGAGCCCAGA-ANRG	GCAGCATAGTGAGCCCAGAANRG				0	0	0	0	39.98	0	0	0	GGAACAGCATAGAGAACCCAGAAACAGAT	0.433567	0
DNA	1	chrX	67368397	+	3	ACAGAATAGTGGGCCCAGAAATGG	ACAGAATAGTGGGCCCAGAAATGG	GCAGCATAGTGAGCCCAGA-ANRG	GCAGCATAGTGAGCCCAGAANRG				0	0	0	0	40.59	0	0	0	GGAACAGAATAGTGGGCCCAGAAATGGGG	0.585973	0
DNA	1	chrX	79039585	-	3	ACAGAATAGAGAGCCCAGAAAAAG	ACAGAATAGAGAGCCCAGAAAAAG	GCAGCATAGTGAGCCCAGA-ANRG	GCAGCATAGTGAGCCCAGAANRG				0	0	0	0	40.89	0	0	0	GAACAGAATAGAGAGCCCAGAAAAAGGCT	0.130607	0
DNA	1	chrX	88023641	+	3	ACAGAATAGGGAGCCCAGAAATAG	ACAGAATAGGGAGCCCAGAAATAG	GCAGCATAGTGAGCCCAGA-ANRG	GCAGCATAGTGAGCCCAGAANRG				0	0	0	0	40.89	0	0	0	TTAACAGAATAGGGAGCCCAGAAATAGAC	0.463841	0
DNA	1	chrX	100299544	+	3	GGAGAATAGAGAGCCCAGAGACAG	GGAGAATAGAGAGCCCAGAGACAG	GCAGCATAGTGAGCCCAGA-ANRG	GCAGCATAGTGAGCCCAGAANRG				0	0	0	0	40.88	0	0	0	GAGGGAGAATAGAGAGCCCAGAGACAGAC	0.176802	0
DNA	1	chrX	152242095	+	3	ACAGAATAGAGAGCCCAGAAATAG	ACAGAATAGAGAGCCCAGAAATAG	GCAGCATAGTGAGCCCAGA-ANRG	GCAGCATAGTGAGCCCAGAANRG				0	0	0	0	40.89	0	0	0	GGAACAGAATAGAGAGCCCAGAAATAGAT	0.460785	0
DNA	1	chrX	150382305	-	3	GCAGAATAAGGAGCCCAGAAATAG	GCAGAATAAGGAGCCCAGAAATAG	GCAGCATAGTGAGCCCAGA-ANRG	GCAGCATAGTGAGCCCAGAANRG				0	0	0	0	40.66	0	0	0	GAGCAGAATAAGGAGCCCAGAAATAGACC	0.126329	0
DNA	1	chrX	140874376	+	3	ACAGAATAGAGAGCCCAGAAATAG	ACAGAATAGAGAGCCCAGAAATAG	GCAGCATAGTGAGCCCAGA-ANRG	GCAGCATAGTGAGCCCAGAANRG				0	0	0	0	40.89	0	0	0	GAAACAGAATAGAGAGCCCAGAAATAGAC	0.454716	0
DNA	1	chrX	140324853	+	3	ACAGAATAGAGAGCCCAGAAATAG	ACAGAATAGAGAGCCCAGAAATAG	GCAGCATAGTGAGCCCAGA-ANRG	GCAGCATAGTGAGCCCAGAANRG				0	0	0	0	40.89	0	0	0	GGAACAGAATAGAGAGCCCAGAAATAGAC	0.453381	0
DNA	1	chrX	124138074	-	3	ACAGAATAGAGAGCCCAGAAATAG	ACAGAATAGAGAGCCCAGAAATAG	GCAGCATAGTGAGCCCAGA-ANRG	GCAGCATAGTGAGCCCAGAANRG				0	0	0	0	40.89	0	0	0	GAACAGAATAGAGAGCCCAGAAATAGGGC	0.111983	0
DNA	1	chrX	106534586	-	3	ACAGAATAGAGAGCCCAGAAATAG	ACAGAATAGAGAGCCCAGAAATAG	GCAGCATAGTGAGCCCAGA-ANRG	GCAGCATAGTGAGCCCAGAANRG				0	0	0	0	40.89	0	0	0	GAACAGAATAGAGAGCCCAGAAATAGACC	0.117788	0
DNA	1	chrX	106580174	+	2	GCAGAATAGAGAGCCCAGAAATAG	GCAGAATAGAGAGCCCAGAAATAG	GCAGCATAGTGAGCCCAGA-ANRG	GCAGCATAGTGAGCCCAGAANRG				0	0	0	0	41.01	0	0	0	GGAGCAGAATAGAGAGCCCAGAAATAGAC	0.660744	0
DNA	1	chrX	79039585	-	3	ACAGAATAGAGAGCCCAGAAAAAG	ACAGAATAGAGAGCCCAGAAAAAG	GCAGCATAGTGAGCCCAG-AANRG	GCAGCATAGTGAGCCCAGAANRG				0	0	0	0	41.89	0	0	0	GAACAGAATAGAGAGCCCAGAAAAAGGCT	0.130607	0
DNA	1	chrX	67368397	+	3	ACAGAATAGTGGGCCCAGAAATGG	ACAGAATAGTGGGCCCAGAAATGG	GCAGCATAGTGAGCCCAG-AANRG	GCAGCATAGTGAGCCCAGAANRG				0	0	0	0	41.59	0	0	0	GGAACAGAATAGTGGGCCCAGAAATGGGG	0.585973	0
DNA	1	chrX	53656856	+	3	GCAGAATAGAGAACCCAGAAATAG	GCAGAATAGAGAACCCAGAAATAG	GCAGCATAGTGAGCCCAG-AANRG	GCAGCATAGTGAGCCCAGAANRG				0	0	0	0	40.91	0	0	0	AGAGCAGAATAGAGAACCCAGAAATAGAC	0.450536	0
DNA	1	chrX	52137960	+	3	ACAGAATAGAGAGCCCAGAAATAG	ACAGAATAGAGAGCCCAGAAATAG	GCAGCATAGTGAGCCCAG-AANRG	GCAGCATAGTGAGCCCAGAANRG				0	0	0	0	41.89	0	0	0	GGAACAGAATAGAGAGCCCAGAAATAGAC	0.453381	0
DNA	1	chrX	45493295	-	3	GCAGAATAGAGAACCCAGAAACAG	GCAGAATAGAGAACCCAGAAACAG	GCAGCATAGTGAGCCCAG-AANRG	GCAGCATAGTGAGCCCAGAANRG				0	0	0	0	40.91	0	0	0	GAGCAGAATAGAGAACCCAGAAACAGATC	0.125677	0
DNA	1	chrX	33280754	-	3	ACAGAATAGAGAGCCCAGAAATAG	ACAGAATAGAGAGCCCAGAAATAG	GCAGCATAGTGAGCCCAG-AANRG	GCAGCATAGTGAGCCCAGAANRG				0	0	0	0	41.89	0	0	0	AAACAGAATAGAGAGCCCAGAAATAGATC	0.117623	0
DNA	1	chrX	1943825	+	3	ACAGCATAGAGAACCCAGAAACAG	ACAGCATAGAGAACCCAGAAACAG	GCAGCATAGTGAGCCCAG-AANRG	GCAGCATAGTGAGCCCAGAANRG				0	0	0	0	40.98	0	0	0	GGAACAGCATAGAGAACCCAGAAACAGAT	0.433567	0
DNA	1	chrX	20071665	+	3	TCAGCAGAGTGAGCCCCAAAACAG	TCAGCAGAGTGAGCCCCAAAACAG	GCAGCATAGTGAGC-CCAGAANRG	GCAGCATAGTGAGCCCAGAANRG				0	0	0	0	40.45	0	0	0	AGCTCAGCAGAGTGAGCCCCAAAACAGTC	0.212826	0
DNA	1	chrX	88023641	+	3	ACAGAATAGGGAGCCCAGAAATAG	ACAGAATAGGGAGCCCAGAAATAG	GCAGCATAGTGAGCCCAG-AANRG	GCAGCATAGTGAGCCCAGAANRG				0	0	0	0	41.89	0	0	0	TTAACAGAATAGGGAGCCCAGAAATAGAC	0.463841	0
RNA	1	chrX	143472518	+	2	GCAGC-TGGTGAGCCCAGACCAG	GCAGCTGGTGAGCCCAGACCAG	GCAGCATAGTGAGCCCAGAANRG	GCAGCATAGTGAGCCCAGAANRG				0	0	0	0	41.41	0	0	0	GTGGCAGCTGGTGAGCCCAGACCAGTGGA	0.211279	0
DNA	1	chrX	106534586	-	3	ACAGAATAGAGAGCCCAGAAATAG	ACAGAATAGAGAGCCCAGAAATAG	GCAGCATAGTGAGCCCAG-AANRG	GCAGCATAGTGAGCCCAGAANRG				0	0	0	0	41.89	0	0	0	GAACAGAATAGAGAGCCCAGAAATAGACC	0.117788	0
DNA	1	chrX	106624010	-	3	GAAGCATAGAGAGCTCAGGAAGAG	GAAGCATAGAGAGCTCAGGAAGAG	GCAGCATAGTGAGCCCAG-AANRG	GCAGCATAGTGAGCCCAGAANRG				0	0	0	0	40.17	0	0	0	ATGAAGCATAGAGAGCTCAGGAAGAGATG	0.122266	0
DNA	1	chrX	106580174	+	2	GCAGAATAGAGAGCCCAGAAATAG	GCAGAATAGAGAGCCCAGAAATAG	GCAGCATAGTGAGCCCAG-AANRG	GCAGCATAGTGAGCCCAGAANRG				0	0	0	0	42.01	0	0	0	GGAGCAGAATAGAGAGCCCAGAAATAGAC	0.660744	0
DNA	1	chrX	152242095	+	3	ACAGAATAGAGAGCCCAGAAATAG	ACAGAATAGAGAGCCCAGAAATAG	GCAGCATAGTGAGCCCAG-AANRG	GCAGCATAGTGAGCCCAGAANRG				0	0	0	0	41.89	0	0	0	GGAACAGAATAGAGAGCCCAGAAATAGAT	0.460785	0
DNA	1	chrX	150382305	-	3	GCAGAATAAGGAGCCCAGAAATAG	GCAGAATAAGGAGCCCAGAAATAG	GCAGCATAGTGAGCCCAG-AANRG	GCAGCATAGTGAGCCCAGAANRG				0	0	0	0	41.66	0	0	0	GAGCAGAATAAGGAGCCCAGAAATAGACC	0.126329	0
DNA	1	chrX	140874376	+	3	ACAGAATAGAGAGCCCAGAAATAG	ACAGAATAGAGAGCCCAGAAATAG	GCAGCATAGTGAGCCCAG-AANRG	GCAGCATAGTGAGCCCAGAANRG				0	0	0	0	41.89	0	0	0	GAAACAGAATAGAGAGCCCAGAAATAGAC	0.454716	0
DNA	1	chrX	140324853	+	3	ACAGAATAGAGAGCCCAGAAATAG	ACAGAATAGAGAGCCCAGAAATAG	GCAGCATAGTGAGCCCAG-AANRG	GCAGCATAGTGAGCCCAGAANRG				0	0	0	0	41.89	0	0	0	GGAACAGAATAGAGAGCCCAGAAATAGAC	0.453381	0
DNA	1	chrX	124138074	-	3	ACAGAATAGAGAGCCCAGAAATAG	ACAGAATAGAGAGCCCAGAAATAG	GCAGCATAGTGAGCCCAG-AANRG	GCAGCATAGTGAGCCCAGAANRG				0	0	0	0	41.89	0	0	0	GAACAGAATAGAGAGCCCAGAAATAGGGC	0.111983	0
DNA	1	chrX	20071665	+	3	TCAGCAGAGTGAGCCCCAAAACAG	TCAGCAGAGTGAGCCCCAAAACAG	GCAGCATAGTGAGCC-CAGAANRG	GCAGCATAGTGAGCCCAGAANRG				0	0	0	0	40.05	0	0	0	AGCTCAGCAGAGTGAGCCCCAAAACAGTC	0.212826	0
DNA	1	chrX	140481279	-	3	GGCAACAGAGTGAGCGCAGAAGGG	GGCAACAGAGTGAGCGCAGAAGGG	G-CAGCATAGTGAGCCCAGAANRG	GCAGCATAGTGAGCCCAGAANRG				0	0	0	0	44.81	0	0	0	AAGGCAACAGAGTGAGCGCAGAAGGGCAA	0.502947	0
DNA	1	chrX	111580138	-	3	ATCAGAATAGAGAGCCCAGAACGG	ATCAGAATAGAGAGCCCAGAACGG	G-CAGCATAGTGAGCCCAGAANRG	GCAGCATAGTGAGCCCAGAANRG				0	0	0	0	46.54	0	0	0	GAATCAGAATAGAGAGCCCAGAACGGGCT	0.456024	0
DNA	1	chrX	94304622	-	3	GCTTGCATCTTGAGCCCAGAAAAG	GCTTGCATCTTGAGCCCAGAAAAG	GCA-GCATAGTGAGCCCAGAANRG	GCAGCATAGTGAGCCCAGAANRG				0	0	0	0	46.53	0	0	0	CAGCTTGCATCTTGAGCCCAGAAAAGCCA	0.163419	0
DNA	1	chrX	90096021	+	3	GCTTGCATAGTGTACCCAGAAAAG	GCTTGCATAGTGTACCCAGAAAAG	GCA-GCATAGTGAGCCCAGAANRG	GCAGCATAGTGAGCCCAGAANRG				0	0	0	0	44.98	0	0	0	AAAGCTTGCATAGTGTACCCAGAAAAGCT	0.0910158	0
DNA	1	chrX	64118237	-	3	AACAGAATAGAGAGCCCAGAAAGG	AACAGAATAGAGAGCCCAGAAAGG	G-CAGCATAGTGAGCCCAGAANRG	GCAGCATAGTGAGCCCAGAANRG				0	0	0	0	46.54	0	0	0	GGAACAGAATAGAGAGCCCAGAAAGGAGG	0.466243	0
DNA	1	chrX	139382204	+	3	GCAGCCATAGGCTGCCCAGAAGAG	GCAGCCATAGGCTGCCCAGAAGAG	GCAGC-ATAGTGAGCCCAGAANRG	GCAGCATAGTGAGCCCAGAANRG				0	0	0	0	44.89	0	0	0	TGGGCAGCCATAGGCTGCCCAGAAGAGGG	0.122592	0
DNA	1	chrX	106624010	-	3	GAAGCATAGAGAGCTCAGGAAGAG	GAAGCATAGAGAGCTCAGGAAGAG	GCAGCATAGTGAGCCCA-GAANRG	GCAGCATAGTGAGCCCAGAANRG				0	0	0	0	41.17	0	0	0	ATGAAGCATAGAGAGCTCAGGAAGAGATG	0.122266	0
DNA	1	chrX	106580174	+	3	GCAGAATAGAGAGCCCAGAAATAG	GCAGAATAGAGAGCCCAGAAATAG	GCAGCATAGTGAGCCCA-GAANRG	GCAGCATAGTGAGCCCAGAANRG				0	0	0	0	38.01	0	0	0	GGAGCAGAATAGAGAGCCCAGAAATAGAC	0.660744	0
DNA	1	chr9	132156401	-	3	GCAGCAAAGCTTAGCCCAGAAGAG	GCAGCAAAGCTTAGCCCAGAAGAG	GCAGCATAGTG-AGCCCAGAANRG	GCAGCATAGTGAGCCCAGAANRG				0	0	0	0	45.47	0	0	0	AAGCAGCAAAGCTTAGCCCAGAAGAGCCC	0.304884	0
DNA	1	chr9	105887942	+	3	TCAGCATAGTGTTGCACAGAAAGG	TCAGCATAGTGTTGCACAGAAAGG	GCAGCATAGTG-AGCCCAGAANRG	GCAGCATAGTGAGCCCAGAANRG				0	0	0	0	43.38	0	0	0	GAGTCAGCATAGTGTTGCACAGAAAGGGC	0.0795656	0
DNA	1	chr9	132156401	-	3	GCAGCAAAGCTTAGCCCAGAAGAG	GCAGCAAAGCTTAGCCCAGAAGAG	GCAGCATA-GTGAGCCCAGAANRG	GCAGCATAGTGAGCCCAGAANRG				0	0	0	0	45.82	0	0	0	AAGCAGCAAAGCTTAGCCCAGAAGAGCCC	0.304884	0
DNA	1	chr9	119841575	+	3	GATGCATAAGTGAGCCCAGCAGAG	GATGCATAAGTGAGCCCAGCAGAG	GCAGCATA-GTGAGCCCAGAANRG	GCAGCATAGTGAGCCCAGAANRG				0	0	0	0	41.07	0	0	0	AGGGATGCATAAGTGAGCCCAGCAGAGCT	0.128173	0
DNA	1	chr9	134301968	-	3	GCAGCCTGGTGAGCTCAGGAAGGG	GCAGCCTGGTGAGCTCAGGAAGGG	GCAGCATAGTGAGCCCA-GAANRG	GCAGCATAGTGAGCCCAGAANRG				0	0	0	0	41.32	0	0	0	CCGCAGCCTGGTGAGCTCAGGAAGGGCCT	0.222599	0
DNA	1	chr9	34952680	+	3	GCAGAATAGAGAGTCCAGGAATAG	GCAGAATAGAGAGTCCAGGAATAG	GCAGCATAGTGAGCCCA-GAANRG	GCAGCATAGTGAGCCCAGAANRG				0	0	0	0	41.71	0	0	0	ACAGCAGAATAGAGAGTCCAGGAATAGAC	0.26274	0
DNA	1	chr9	1006554	-	3	GCAACATAGTGAGCAAATGAAAGG	GCAACATAGTGAGCAAATGAAAGG	GCAGCATAGTGAGCCCA-GAANRG	GCAGCATAGTGAGCCCAGAANRG				0	0	0	0	39.33	0	0	0	CAGCAACATAGTGAGCAAATGAAAGGTTG	0.210021	0
DNA	1	chr9	83343766	+	3	GCAGTCATTATGAGGCCAGAAAGG	GCAGTCATTATGAGGCCAGAAAGG	GCAG-CATAGTGAGCCCAGAANRG	GCAGCATAGTGAGCCCAGAANRG				0	0	0	0	44.76	0	0	0	GACGCAGTCATTATGAGGCCAGAAAGGCA	0.0762979	0
DNA	1	chr9	111569190	+	3	CCCAGCATACTGAGCCCAGACGAG	CCCAGCATACTGAGCCCAGACGAG	GC-AGCATAGTGAGCCCAGAANRG	GCAGCATAGTGAGCCCAGAANRG				0	0	0	0	46.93	0	0	0	ACTCCCAGCATACTGAGCCCAGACGAGCT	0.203085	0
DNA	1	chr9	96243195	+	3	GCAGCAAACTTAGCCCAGACAGAG	GCAGCAAACTTAGCCCAGACAGAG	GCAGCATAGTGAGCCCAGA-ANRG	GCAGCATAGTGAGCCCAGAANRG				0	0	0	0	40.42	0	0	0	ACTGCAGCAAACTTAGCCCAGACAGAGTT	0.230685	0
DNA	1	chr9	95392045	-	3	GCAGAATAGAGAACCCAGAAATAG	GCAGAATAGAGAACCCAGAAATAG	GCAGCATAGTGAGCCCAGA-ANRG	GCAGCATAGTGAGCCCAGAANRG				0	0	0	0	39.91	0	0	0	GAGCAGAATAGAGAACCCAGAAATAGAGC	0.116533	0
DNA	1	chr9	88981812	-	3	ACAGAATAGAGAGCCCAGAAATAG	ACAGAATAGAGAGCCCAGAAATAG	GCAGCATAGTGAGCCCAGA-ANRG	GCAGCATAGTGAGCCCAGAANRG				0	0	0	0	40.89	0	0	0	GAACAGAATAGAGAGCCCAGAAATAGCCC	0.110663	0
DNA	1	chr9	85102826	-	3	ACTGCATAGTGAACCCAGAAATAG	ACTGCATAGTGAACCCAGAAATAG	GCAGCATAGTGAGCCCAGA-ANRG	GCAGCATAGTGAGCCCAGAANRG				0	0	0	0	40.33	0	0	0	GAACTGCATAGTGAACCCAGAAATAGACC	0.137161	0
DNA	1	chr9	80982614	-	3	GCAGAATAGAGAGTCCAGAAATAG	GCAGAATAGAGAGTCCAGAAATAG	GCAGCATAGTGAGCCCAGA-ANRG	GCAGCATAGTGAGCCCAGAANRG				0	0	0	0	39.71	0	0	0	GAGCAGAATAGAGAGTCCAGAAATAGGCT	0.110447	0
DNA	1	chr9	5653251	-	3	ACAGAATAGAGAGCCCAGAAATAG	ACAGAATAGAGAGCCCAGAAATAG	GCAGCATAGTGAGCCCAGA-ANRG	GCAGCATAGTGAGCCCAGAANRG				0	0	0	0	40.89	0	0	0	GAACAGAATAGAGAGCCCAGAAATAGACA	0.117766	0
DNA	1	chr9	34871717	-	3	ACAGAATAGAGAGCCCAGAAACAG	ACAGAATAGAGAGCCCAGAAACAG	GCAGCATAGTGAGCCCAGA-ANRG	GCAGCATAGTGAGCCCAGAANRG				0	0	0	0	40.89	0	0	0	GAACAGAATAGAGAGCCCAGAAACAGATC	0.136415	0
DNA	1	chr9	74526384	+	3	TCAGCAGTAGTGATCCCAGCATGG	TCAGCAGTAGTGATCCCAGCATGG	GCAGCA-TAGTGAGCCCAGAANRG	GCAGCATAGTGAGCCCAGAANRG				0	0	0	0	40.05	0	0	0	CAGTCAGCAGTAGTGATCCCAGCATGGAG	0.116664	0
DNA	1	chr9	105887942	+	3	TCAGCATAGTGTTGCACAGAAAGG	TCAGCATAGTGTTGCACAGAAAGG	GCAGCATAGTGA-GCCCAGAANRG	GCAGCATAGTGAGCCCAGAANRG				0	0	0	0	43.38	0	0	0	GAGTCAGCATAGTGTTGCACAGAAAGGGC	0.0795656	0
DNA	1	chr9	98209845	-	3	GCAACAGAGTGAGGCCCTGAAAAG	GCAACAGAGTGAGGCCCTGAAAAG	GCAGCATAGTGA-GCCCAGAANRG	GCAGCATAGTGAGCCCAGAANRG				0	0	0	0	42.2	0	0	0	GGGCAACAGAGTGAGGCCCTGAAAAGAAA	0.124326	0
DNA	1	chrX	20071665	+	3	TCAGCAGAGTGAGCCCCAAAACAG	TCAGCAGAGTGAGCCCCAAAACAG	GCAGCATAGTGAG-CCCAGAANRG	GCAGCATAGTGAGCCCAGAANRG				0	0	0	0	41.05	0	0	0	AGCTCAGCAGAGTGAGCCCCAAAACAGTC	0.212826	0
DNA	1	chrX	45756231	-	3	GCAGCAAACTGAGACCCAGAGAAG	GCAGCAAACTGAGACCCAGAGAAG	GCAGCATAGTGAG-CCCAGAANRG	GCAGCATAGTGAGCCCAGAANRG				0	0	0	0	45.82	0	0	0	TGGCAGCAAACTGAGACCCAGAGAAGCCA	0.110087	0
DNA	1	chr9	105646324	+	3	GCAGCATTGCAAGCCACAGAAAGG	GCAGCATTGCAAGCCACAGAAAGG	GCAGCATAGTGAGCC-CAGAANRG	GCAGCATAGTGAGCCCAGAANRG				0	0	0	0	43.93	0	0	0	AGAGCAGCATTGCAAGCCACAGAAAGGGA	0.100791	0
DNA	1	chr9	104621625	+	3	GCAGCTTATTGAGCAACAGAAGAG	GCAGCTTATTGAGCAACAGAAGAG	GCAGCATAGTGAGCC-CAGAANRG	GCAGCATAGTGAGCCCAGAANRG				0	0	0	0	42.94	0	0	0	TTGGCAGCTTATTGAGCAACAGAAGAGAG	0.103026	0
DNA	1	chr9	132156401	-	3	GCAGCAAAGCTTAGCCCAGAAGAG	GCAGCAAAGCTTAGCCCAGAAGAG	GCAGCATAGT-GAGCCCAGAANRG	GCAGCATAGTGAGCCCAGAANRG				0	0	0	0	45.47	0	0	0	AAGCAGCAAAGCTTAGCCCAGAAGAGCCC	0.304884	0
DNA	1	chr9	129436274	+	3	GACAGCAGAGGGAGCCCAGCATGG	GACAGCAGAGGGAGCCCAGCATGG	G-CAGCATAGTGAGCCCAGAANRG	GCAGCATAGTGAGCCCAGAANRG				0	0	0	0	40.6	0	0	0	CTAGACAGCAGAGGGAGCCCAGCATGGGG	0.105236	0
DNA	1	chr9	111569190	+	3	CCCAGCATACTGAGCCCAGACGAG	CCCAGCATACTGAGCCCAGACGAG	G-CAGCATAGTGAGCCCAGAANRG	GCAGCATAGTGAGCCCAGAANRG				0	0	0	0	46.95	0	0	0	ACTCCCAGCATACTGAGCCCAGACGAGCT	0.203085	0
DNA	1	chr11	129086099	+	2	GCAGAATAGAGAGCCCAGAAACAG	GCAGAATAGAGAGCCCAGAAACAG	GCAGCATAGTGAGCCCAGA-ANRG	GCAGCATAGTGAGCCCAGAANRG				0	0	0	0	41.01	0	0	0	GGAGCAGAATAGAGAGCCCAGAAACAGAC	0.507672	0
DNA	1	chr11	106477795	-	2	GCAGAATAGAGAGCCCAGAAATAG	GCAGAATAGAGAGCCCAGAAATAG	GCAGCATAGTGAGCCCAGA-ANRG	GCAGCATAGTGAGCCCAGAANRG				0	0	0	0	41.01	0	0	0	GAGCAGAATAGAGAGCCCAGAAATAGGCA	0.281787	0
DNA	1	chr11	92972735	-	2	GCAGCAGTGGTGAGCCCAGGAGGG	GCAGCAGTGGTGAGCCCAGGAGGG	GCAGCA-TAGTGAGCCCAGAANRG	GCAGCATAGTGAGCCCAGAANRG				0	0	0	0	41.12	0	0	0	GGGCAGCAGTGGTGAGCCCAGGAGGGAAA	0.404868	0
DNA	1	chr11	90959419	+	3	ACAGAATAGAGAGCCCAGCAAAGG	ACAGAATAGAGAGCCCAGCAAAGG	GCAGCATAGTGAGCCCAG-AANRG	GCAGCATAGTGAGCCCAGAANRG				0	0	0	0	41.89	0	0	0	GGAACAGAATAGAGAGCCCAGCAAAGGCC	0.160123	0
DNA	1	chr11	67257296	+	3	GCAGAAAAGGGAGCCCAGAAAAGG	GCAGAAAAGGGAGCCCAGAAAAGG	GCAGCATAGTGAGCCCAG-AANRG	GCAGCATAGTGAGCCCAGAANRG				0	0	0	0	41.78	0	0	0	TCAGCAGAAAAGGGAGCCCAGAAAAGGCA	0.353657	0
DNA	1	chr11	46190806	+	3	ACAGAATAGAGAGCCCAGAAACAG	ACAGAATAGAGAGCCCAGAAACAG	GCAGCATAGTGAGCCCAG-AANRG	GCAGCATAGTGAGCCCAGAANRG				0	0	0	0	41.89	0	0	0	GAAACAGAATAGAGAGCCCAGAAACAGAC	0.360471	0
DNA	1	chr11	35060480	+	3	ACAGAATAGAGAGCCCAGAAACAG	ACAGAATAGAGAGCCCAGAAACAG	GCAGCATAGTGAGCCCAG-AANRG	GCAGCATAGTGAGCCCAGAANRG				0	0	0	0	41.89	0	0	0	GGAACAGAATAGAGAGCCCAGAAACAGAC	0.359547	0
DNA	1	chr11	34218932	-	3	ACAGAATAGAGAGCCCAGAAATAG	ACAGAATAGAGAGCCCAGAAATAG	GCAGCATAGTGAGCCCAG-AANRG	GCAGCATAGTGAGCCCAGAANRG				0	0	0	0	41.89	0	0	0	GAACAGAATAGAGAGCCCAGAAATAGGCC	0.107307	0
DNA	1	chr11	22043011	-	3	ACAGAATAGAGAGCCCAGAAATAG	ACAGAATAGAGAGCCCAGAAATAG	GCAGCATAGTGAGCCCAG-AANRG	GCAGCATAGTGAGCCCAGAANRG				0	0	0	0	41.89	0	0	0	GGACAGAATAGAGAGCCCAGAAATAGATT	0.117928	0
DNA	1	chr11	94556774	-	3	GCAGAATAGAAAGCCCAGAAATAG	GCAGAATAGAAAGCCCAGAAATAG	GCAGCATAGTGAGCCCAG-AANRG	GCAGCATAGTGAGCCCAGAANRG				0	0	0	0	41.31	0	0	0	GAGCAGAATAGAAAGCCCAGAAATAGGGA	0.124576	0
DNA	1	chr11	106477795	-	2	GCAGAATAGAGAGCCCAGAAATAG	GCAGAATAGAGAGCCCAGAAATAG	GCAGCATAGTGAGCCCAG-AANRG	GCAGCATAGTGAGCCCAGAANRG				0	0	0	0	42.01	0	0	0	GAGCAGAATAGAGAGCCCAGAAATAGGCA	0.281787	0
DNA	1	chr11	129086099	+	2	GCAGAATAGAGAGCCCAGAAACAG	GCAGAATAGAGAGCCCAGAAACAG	GCAGCATAGTGAGCCCAG-AANRG	GCAGCATAGTGAGCCCAGAANRG				0	0	0	0	42.01	0	0	0	GGAGCAGAATAGAGAGCCCAGAAACAGAC	0.507672	0
RNA	1	chr11	15124346	-	2	GCAG-ATAGTGAGCCAAGAGGAG	GCAGATAGTGAGCCAAGAGGAG	GCAGCATAGTGAGCCCAGAANRG	GCAGCATAGTGAGCCCAGAANRG				0	0	0	0	39.4	0	0	0	AAAAGCAGATAGTGAGCCAAGAGGAGTAA	0.238299	0
DNA	1	chr11	125408417	+	2	GCAGCAGAGGTGAGCTCAGAATAG	GCAGCAGAGGTGAGCTCAGAATAG	GCAGCATA-GTGAGCCCAGAANRG	GCAGCATAGTGAGCCCAGAANRG				0	0	0	0	44.82	0	0	0	ACAGCAGCAGAGGTGAGCTCAGAATAGAA	0.159847	0
RNA	1	chr11	16160759	+	2	GCAGCACAGTGAGCCCAG-GGGG	GCAGCACAGTGAGCCCAGGGGG	GCAGCATAGTGAGCCCAGAANRG	GCAGCATAGTGAGCCCAGAANRG				0	0	0	0	36.66	0	0	0	AAAGCAGCACAGTGAGCCCAGGGGGCTAA	0.558396	0
RNA	1	chr11	120223912	+	2	GCAGGA-ATTGAGCCCAGAATGG	GCAGGAATTGAGCCCAGAATGG	GCAGCATAGTGAGCCCAGAANRG	GCAGCATAGTGAGCCCAGAANRG				0	0	0	0	47.12	0	0	0	CTGGCAGGAATTGAGCCCAGAATGGAATA	0.148854	0
RNA	1	chr11	45369042	+	2	GCAGCA-AGGGAGCCCGGAAAAG	GCAGCAAGGGAGCCCGGAAAAG	GCAGCATAGTGAGCCCAGAANRG	GCAGCATAGTGAGCCCAGAANRG				0	0	0	0	44.16	0	0	0	GCTGCAGCAAGGGAGCCCGGAAAAGTAGA	0.195443	0
DNA	1	chr18	49481447	+	3	GCCATATGAGTGAGCCCAGAACAG	GCCATATGAGTGAGCCCAGAACAG	GCAGCAT-AGTGAGCCCAGAANRG	GCAGCATAGTGAGCCCAGAANRG				0	0	0	0	46.92	0	0	0	CCAGCCATATGAGTGAGCCCAGAACAGCA	0.116776	0
DNA	1	chr18	37577198	-	3	AAAGGATGAGTGAGCCCAGAAGGG	AAAGGATGAGTGAGCCCAGAAGGG	GCAGCAT-AGTGAGCCCAGAANRG	GCAGCATAGTGAGCCCAGAANRG				0	0	0	0	46.99	0	0	0	GCAAAGGATGAGTGAGCCCAGAAGGGAAA	0.217145	0
DNA	1	chr18	56146439	-	3	GCAGCAGACTGAAGCCTAGAAAAG	GCAGCAGACTGAAGCCTAGAAAAG	GCAGCATAGTG-AGCCCAGAANRG	GCAGCATAGTGAGCCCAGAANRG				0	0	0	0	43.32	0	0	0	AGGCAGCAGACTGAAGCCTAGAAAAGGAG	0.0954208	0
DNA	1	chr18	74280788	-	3	GCAGAATAGAGAGGCCAGAGATAG	GCAGAATAGAGAGGCCAGAGATAG	GCAGCATAGTGAGCCCAGA-ANRG	GCAGCATAGTGAGCCCAGAANRG				0	0	0	0	39.71	0	0	0	TAGCAGAATAGAGAGGCCAGAGATAGACT	0.128127	0
DNA	1	chr18	72189950	-	3	ACAGAATAGGGAGCCCAGACATAG	ACAGAATAGGGAGCCCAGACATAG	GCAGCATAGTGAGCCCAGA-ANRG	GCAGCATAGTGAGCCCAGAANRG				0	0	0	0	40.89	0	0	0	AAACAGAATAGGGAGCCCAGACATAGACC	0.121395	0
DNA	1	chr18	51336141	-	3	GTATCATAGAGAGCCCAGATATAG	GTATCATAGAGAGCCCAGATATAG	GCAGCATAGTGAGCCCAGA-ANRG	GCAGCATAGTGAGCCCAGAANRG				0	0	0	0	40.9	0	0	0	AAGTATCATAGAGAGCCCAGATATAGACC	0.129284	0
DNA	1	chr18	38231932	-	3	ACAGAATAGAGAGCCCAGAAATAG	ACAGAATAGAGAGCCCAGAAATAG	GCAGCATAGTGAGCCCAGA-ANRG	GCAGCATAGTGAGCCCAGAANRG				0	0	0	0	40.89	0	0	0	AAACAGAATAGAGAGCCCAGAAATAGATC	0.117623	0
DNA	1	chr18	31434207	+	3	ACAGAATAGAGAGCCCAGAAATAG	ACAGAATAGAGAGCCCAGAAATAG	GCAGCATAGTGAGCCCAGA-ANRG	GCAGCATAGTGAGCCCAGAANRG				0	0	0	0	40.89	0	0	0	GGAACAGAATAGAGAGCCCAGAAATAGAC	0.453381	0
DNA	1	chr18	8326601	+	3	ACAGAATAGAGAGCCCAGAAATGG	ACAGAATAGAGAGCCCAGAAATGG	GCAGCATAGTGAGCCCAGA-ANRG	GCAGCATAGTGAGCCCAGAANRG				0	0	0	0	40.89	0	0	0	AGAACAGAATAGAGAGCCCAGAAATGGTG	0.455201	0
DNA	1	chr18	4726139	+	3	ACAGCATAGACAGCCCAGAAACAG	ACAGCATAGACAGCCCAGAAACAG	GCAGCATAGTGAGCCCAGA-ANRG	GCAGCATAGTGAGCCCAGAANRG				0	0	0	0	40.38	0	0	0	GGAACAGCATAGACAGCCCAGAAACAGAC	0.414492	0
DNA	1	chr18	4218220	-	2	GCAGAATAGAGAGCCCAGAAATAG	GCAGAATAGAGAGCCCAGAAATAG	GCAGCATAGTGAGCCCAGA-ANRG	GCAGCATAGTGAGCCCAGAANRG				0	0	0	0	41.01	0	0	0	CAGCAGAATAGAGAGCCCAGAAATAGACT	0.289936	0
DNA	1	chr18	7732886	-	3	GCTGCATAGGGAGCCCTGGAAAAG	GCTGCATAGGGAGCCCTGGAAAAG	GCAGCATAGTGAGCCC-AGAANRG	GCAGCATAGTGAGCCCAGAANRG				0	0	0	0	40.05	0	0	0	TGGCTGCATAGGGAGCCCTGGAAAAGCTT	0.131372	0
DNA	1	chr18	64036970	-	3	GCAGGTTAGTGGGCCCCAGAATAG	GCAGGTTAGTGGGCCCCAGAATAG	GCAGCATAGTGAGCCC-AGAANRG	GCAGCATAGTGAGCCCAGAANRG				0	0	0	0	43.5	0	0	0	CAGCAGGTTAGTGGGCCCCAGAATAGAGG	0.134228	0
DNA	1	chr18	37796720	+	3	GCTGCTTGGTGAGGCCCAGAATGG	GCTGCTTGGTGAGGCCCAGAATGG	GCAGCATAGTGAG-CCCAGAANRG	GCAGCATAGTGAGCCCAGAANRG				0	0	0	0	45.77	0	0	0	AGGGCTGCTTGGTGAGGCCCAGAATGGAA	0.130347	0
RNA	1	chr18	64107231	-	2	CCAGAATA-TGAGCCCAGAACAG	CCAGAATATGAGCCCAGAACAG	GCAGCATAGTGAGCCCAGAANRG	GCAGCATAGTGAGCCCAGAANRG				0	0	0	0	47.23	0	0	0	TGACCCAGAATATGAGCCCAGAACAGTCG	0.193267	0
DNA	1	chr18	64036970	-	3	GCAGGTTAGTGGGCCCCAGAATAG	GCAGGTTAGTGGGCCCCAGAATAG	GCAGCATAGTGAG-CCCAGAANRG	GCAGCATAGTGAGCCCAGAANRG				0	0	0	0	45.2	0	0	0	CAGCAGGTTAGTGGGCCCCAGAATAGAGG	0.134228	0
RNA	1	chr18	11494008	-	2	GAAGCACAGTGA-CCCAGAAAAG	GAAGCACAGTGACCCAGAAAAG	GCAGCATAGTGAGCCCAGAANRG	GCAGCATAGTGAGCCCAGAANRG				0	0	0	0	46.43	0	0	0	CCAGGAAGCACAGTGACCCAGAAAAGTTT	0.220248	0
DNA	1	chrX	92281132	-	3	GCAGGATGATGATGCCCAGAAAAG	GCAGGATGATGATGCCCAGAAAAG	GCAGCATAGTGA-GCCCAGAANRG	GCAGCATAGTGAGCCCAGAANRG				0	0	0	0	45.79	0	0	0	TAGCAGGATGATGATGCCCAGAAAAGTGC	0.133651	0
DNA	1	chrX	32253946	-	3	GAACGATAGTGATGCCCAGAAGAG	GAACGATAGTGATGCCCAGAAGAG	GCAGCATAGTGA-GCCCAGAANRG	GCAGCATAGTGAGCCCAGAANRG				0	0	0	0	46.11	0	0	0	ATGAACGATAGTGATGCCCAGAAGAGAAA	0.133811	0
DNA	1	chr18	64036970	-	3	GCAGGTTAGTGGGCCCCAGAATAG	GCAGGTTAGTGGGCCCCAGAATAG	GCAGCATAGTGAGC-CCAGAANRG	GCAGCATAGTGAGCCCAGAANRG				0	0	0	0	44.6	0	0	0	CAGCAGGTTAGTGGGCCCCAGAATAGAGG	0.134228	0
DNA	1	chr18	38231932	-	3	ACAGAATAGAGAGCCCAGAAATAG	ACAGAATAGAGAGCCCAGAAATAG	GCAGCATAGTGAGCCCAG-AANRG	GCAGCATAGTGAGCCCAGAANRG				0	0	0	0	41.89	0	0	0	AAACAGAATAGAGAGCCCAGAAATAGATC	0.117623	0
DNA	1	chr18	31434207	+	3	ACAGAATAGAGAGCCCAGAAATAG	ACAGAATAGAGAGCCCAGAAATAG	GCAGCATAGTGAGCCCAG-AANRG	GCAGCATAGTGAGCCCAGAANRG				0	0	0	0	41.89	0	0	0	GGAACAGAATAGAGAGCCCAGAAATAGAC	0.453381	0
DNA	1	chr18	8326601	+	3	ACAGAATAGAGAGCCCAGAAATGG	ACAGAATAGAGAGCCCAGAAATGG	GCAGCATAGTGAGCCCAG-AANRG	GCAGCATAGTGAGCCCAGAANRG				0	0	0	0	41.89	0	0	0	AGAACAGAATAGAGAGCCCAGAAATGGTG	0.455201	0
DNA	1	chr18	7732886	-	3	GCTGCATAGGGAGCCCTGGAAAAG	GCTGCATAGGGAGCCCTGGAAAAG	GCAGCATAGTGAGCCCAG-AANRG	GCAGCATAGTGAGCCCAGAANRG				0	0	0	0	39.05	0	0	0	TGGCTGCATAGGGAGCCCTGGAAAAGCTT	0.131372	0
RNA	1	chr18	61811874	+	2	GCAGC-TAATGATCCCAGAAAAG	GCAGCTAATGATCCCAGAAAAG	GCAGCATAGTGAGCCCAGAANRG	GCAGCATAGTGAGCCCAGAANRG				0	0	0	0	46.23	0	0	0	CATGCAGCTAATGATCCCAGAAAAGGGGC	0.202916	0
DNA	1	chr18	4726139	+	3	ACAGCATAGACAGCCCAGAAACAG	ACAGCATAGACAGCCCAGAAACAG	GCAGCATAGTGAGCCCAG-AANRG	GCAGCATAGTGAGCCCAGAANRG				0	0	0	0	41.38	0	0	0	GGAACAGCATAGACAGCCCAGAAACAGAC	0.414492	0
DNA	1	chr18	4218220	-	2	GCAGAATAGAGAGCCCAGAAATAG	GCAGAATAGAGAGCCCAGAAATAG	GCAGCATAGTGAGCCCAG-AANRG	GCAGCATAGTGAGCCCAGAANRG				0	0	0	0	42.01	0	0	0	CAGCAGAATAGAGAGCCCAGAAATAGACT	0.289936	0
DNA	1	chr11	34507599	-	3	GCAGCAAAGTTGAGACCAGCACAG	GCAGCAAAGTTGAGACCAGCACAG	GCAGCATAG-TGAGCCCAGAANRG	GCAGCATAGTGAGCCCAGAANRG				0	0	0	0	39.07	0	0	0	AAGCAGCAAAGTTGAGACCAGCACAGGCA	0.0836406	0
DNA	1	chr11	64629089	+	3	CCAGCATAGGTGAGCCCATGAAAG	CCAGCATAGGTGAGCCCATGAAAG	GCAGCATAG-TGAGCCCAGAANRG	GCAGCATAGTGAGCCCAGAANRG				0	0	0	0	36.08	0	0	0	ACTCCAGCATAGGTGAGCCCATGAAAGTT	0.113786	0
DNA	1	chr11	92972735	-	3	GCAGCAGTGGTGAGCCCAGGAGGG	GCAGCAGTGGTGAGCCCAGGAGGG	GCAGCATAG-TGAGCCCAGAANRG	GCAGCATAGTGAGCCCAGAANRG				0	0	0	0	40.7	0	0	0	GGGCAGCAGTGGTGAGCCCAGGAGGGAAA	0.404868	0
DNA	1	chr11	125408417	+	2	GCAGCAGAGGTGAGCTCAGAATAG	GCAGCAGAGGTGAGCTCAGAATAG	GCAGCATAG-TGAGCCCAGAANRG	GCAGCATAGTGAGCCCAGAANRG				0	0	0	0	44.67	0	0	0	ACAGCAGCAGAGGTGAGCTCAGAATAGAA	0.159847	0
DNA	1	chr11	44618893	-	3	GCAGCAGAGGGAGGCCCAGAGCGG	GCAGCAGAGGGAGGCCCAGAGCGG	GCAGCATAGTGAG-CCCAGAANRG	GCAGCATAGTGAGCCCAGAANRG				0	0	0	0	45.67	0	0	0	AGGCAGCAGAGGGAGGCCCAGAGCGGGGC	0.229898	0
DNA	1	chr11	2534137	+	3	GCAGCAAAGTGAGACCCTGTAGGG	GCAGCAAAGTGAGACCCTGTAGGG	GCAGCATAGTGAG-CCCAGAANRG	GCAGCATAGTGAGCCCAGAANRG				0	0	0	0	36.17	0	0	0	CCAGCAGCAAAGTGAGACCCTGTAGGGAG	0.129567	0
DNA	1	chr11	86117758	+	3	GAAGGATATTGAGGCCCAGAAGGG	GAAGGATATTGAGGCCCAGAAGGG	GCAGCATAGTGAG-CCCAGAANRG	GCAGCATAGTGAGCCCAGAANRG				0	0	0	0	45.73	0	0	0	CAAGAAGGATATTGAGGCCCAGAAGGGTT	0.133966	0
DNA	1	chr18	64036970	-	3	GCAGGTTAGTGGGCCCCAGAATAG	GCAGGTTAGTGGGCCCCAGAATAG	GCAGCATAGTGAGCC-CAGAANRG	GCAGCATAGTGAGCCCAGAANRG				0	0	0	0	44.2	0	0	0	CAGCAGGTTAGTGGGCCCCAGAATAGAGG	0.134228	0
DNA	1	chr18	7732886	-	3	GCTGCATAGGGAGCCCTGGAAAAG	GCTGCATAGGGAGCCCTGGAAAAG	GCAGCATAGTGAGCCCA-GAANRG	GCAGCATAGTGAGCCCAGAANRG				0	0	0	0	40.05	0	0	0	TGGCTGCATAGGGAGCCCTGGAAAAGCTT	0.131372	0
DNA	1	chr18	4218220	-	3	GCAGAATAGAGAGCCCAGAAATAG	GCAGAATAGAGAGCCCAGAAATAG	GCAGCATAGTGAGCCCA-GAANRG	GCAGCATAGTGAGCCCAGAANRG				0	0	0	0	38.01	0	0	0	CAGCAGAATAGAGAGCCCAGAAATAGACT	0.289936	0
RNA	1	chr11	47944540	+	2	GCAGCACATT-AGCCCAGAATAG	GCAGCACATTAGCCCAGAATAG	GCAGCATAGTGAGCCCAGAANRG	GCAGCATAGTGAGCCCAGAANRG				0	0	0	0	46.61	0	0	0	AGGGCAGCACATTAGCCCAGAATAGAGCA	0.16713	0
RNA	1	chr11	47944540	+	2	GCAGCACA-TTAGCCCAGAATAG	GCAGCACATTAGCCCAGAATAG	GCAGCATAGTGAGCCCAGAANRG	GCAGCATAGTGAGCCCAGAANRG				0	0	0	0	46.61	0	0	0	AGGGCAGCACATTAGCCCAGAATAGAGCA	0.16713	0
DNA	1	chr18	56146439	-	3	GCAGCAGACTGAAGCCTAGAAAAG	GCAGCAGACTGAAGCCTAGAAAAG	GCAGCATAGTGA-GCCCAGAANRG	GCAGCATAGTGAGCCCAGAANRG				0	0	0	0	43.02	0	0	0	AGGCAGCAGACTGAAGCCTAGAAAAGGAG	0.0954208	0
DNA	1	chr18	37796720	+	3	GCTGCTTGGTGAGGCCCAGAATGG	GCTGCTTGGTGAGGCCCAGAATGG	GCAGCATAGTGA-GCCCAGAANRG	GCAGCATAGTGAGCCCAGAANRG				0	0	0	0	45.97	0	0	0	AGGGCTGCTTGGTGAGGCCCAGAATGGAA	0.130347	0
DNA	1	chr18	27717315	-	3	GTCTCCATAGTGAGCCCATAAAGG	GTCTCCATAGTGAGCCCATAAAGG	G-CAGCATAGTGAGCCCAGAANRG	GCAGCATAGTGAGCCCAGAANRG				0	0	0	0	42.21	0	0	0	CAGTCTCCATAGTGAGCCCATAAAGGCCT	0.32283	0
DNA	1	chr6	168589319	+	3	GGCAGCATAGTGTTCCCAGAGCAG	GGCAGCATAGTGTTCCCAGAGCAG	G-CAGCATAGTGAGCCCAGAANRG	GCAGCATAGTGAGCCCAGAANRG				0	0	0	0	45.17	0	0	0	TGGGGCAGCATAGTGTTCCCAGAGCAGAC	0.234932	0
DNA	1	chr6	64356905	+	3	GCAAGCTTAATTAGCCCAGAATAG	GCAAGCTTAATTAGCCCAGAATAG	GCA-GCATAGTGAGCCCAGAANRG	GCAGCATAGTGAGCCCAGAANRG				0	0	0	0	46	0	0	0	TGAGCAAGCTTAATTAGCCCAGAATAGTT	0.131669	0
DNA	1	chr6	50393611	-	3	GCAAGGAGTGTGAGCCCAGAAGAG	GCAAGGAGTGTGAGCCCAGAAGAG	GCA-GCATAGTGAGCCCAGAANRG	GCAGCATAGTGAGCCCAGAANRG				0	0	0	0	46.7	0	0	0	TTGCAAGGAGTGTGAGCCCAGAAGAGCAC	0.107257	0
DNA	1	chr14	103147068	+	3	GCAACATAGTGAGACCCCCAAAAG	GCAACATAGTGAGACCCCCAAAAG	GCAGCATAGTGAG-CCCAGAANRG	GCAGCATAGTGAGCCCAGAANRG				0	0	0	0	37.23	0	0	0	TGGGCAACATAGTGAGACCCCCAAAAGCC	0.0400274	0
DNA	1	chr14	91118928	+	3	GCAACATAGTGAGACCCTAAAAAG	GCAACATAGTGAGACCCTAAAAAG	GCAGCATAGTGAG-CCCAGAANRG	GCAGCATAGTGAGCCCAGAANRG				0	0	0	0	37.23	0	0	0	TGGGCAACATAGTGAGACCCTAAAAAGTC	0.159029	0
DNA	1	chr14	46951764	+	2	GCAGCCTTGTGAGACCCAGAACAG	GCAGCCTTGTGAGACCCAGAACAG	GCAGCATAGTGAG-CCCAGAANRG	GCAGCATAGTGAGCCCAGAANRG				0	0	0	0	45.92	0	0	0	ACTGCAGCCTTGTGAGACCCAGAACAGAG	0.112477	0
DNA	1	chr6	15906514	+	3	GCAGCACAGTGAGGAACAGAAAGG	GCAGCACAGTGAGGAACAGAAAGG	GCAGCATAGTGA-GCCCAGAANRG	GCAGCATAGTGAGCCCAGAANRG				0	0	0	0	42.17	0	0	0	AAGGCAGCACAGTGAGGAACAGAAAGGAG	0.0881732	0
DNA	1	chr6	15906514	+	3	GCAGCACAGTGAGGAACAGAAAGG	GCAGCACAGTGAGGAACAGAAAGG	GCAGCATAGTGAGCC-CAGAANRG	GCAGCATAGTGAGCCCAGAANRG				0	0	0	0	41.97	0	0	0	AAGGCAGCACAGTGAGGAACAGAAAGGAG	0.0881732	0
DNA	1	chr6	12690606	+	3	GGGGCTTAGTGAGCCTCAGAAAGG	GGGGCTTAGTGAGCCTCAGAAAGG	GCAGCATAGTGAGCC-CAGAANRG	GCAGCATAGTGAGCCCAGAANRG				0	0	0	0	44.91	0	0	0	GAGGGGGCTTAGTGAGCCTCAGAAAGGGG	0.0899826	0
DNA	1	chr14	92567389	-	3	GCTGCATGACTGACCCCAGAAAAG	GCTGCATGACTGACCCCAGAAAAG	GCAGCAT-AGTGAGCCCAGAANRG	GCAGCATAGTGAGCCCAGAANRG				0	0	0	0	45.48	0	0	0	CAGCTGCATGACTGACCCCAGAAAAGACC	0.104207	0
DNA	1	chr14	80269384	+	3	GCAGCATCCGTGAGAACAGAAAAG	GCAGCATCCGTGAGAACAGAAAAG	GCAGCAT-AGTGAGCCCAGAANRG	GCAGCATAGTGAGCCCAGAANRG				0	0	0	0	42.88	0	0	0	ATTGCAGCATCCGTGAGAACAGAAAAGAG	0.0924372	0
DNA	1	chr14	65773556	-	3	GCAGCATTAGTGGCCCCAGATAAG	GCAGCATTAGTGGCCCCAGATAAG	GCAGCAT-AGTGAGCCCAGAANRG	GCAGCATAGTGAGCCCAGAANRG				0	0	0	0	45.03	0	0	0	GTGCAGCATTAGTGGCCCCAGATAAGCAA	0.184586	0
DNA	1	chr14	70398209	+	3	GCAGCCACAGACAGCCCAGAAAAG	GCAGCCACAGACAGCCCAGAAAAG	GCAG-CATAGTGAGCCCAGAANRG	GCAGCATAGTGAGCCCAGAANRG				0	0	0	0	45.74	0	0	0	TGGGCAGCCACAGACAGCCCAGAAAAGGC	0.100808	0
DNA	1	chr14	55921860	+	3	GCATTCATAGTGAGCTTAGAAGGG	GCATTCATAGTGAGCTTAGAAGGG	GCAG-CATAGTGAGCCCAGAANRG	GCAGCATAGTGAGCCCAGAANRG				0	0	0	0	42.04	0	0	0	AATGCATTCATAGTGAGCTTAGAAGGGGC	0.142023	0
DNA	1	chr14	65773556	-	3	GCAGCATTAGTGGCCCCAGATAAG	GCAGCATTAGTGGCCCCAGATAAG	GCAGCA-TAGTGAGCCCAGAANRG	GCAGCATAGTGAGCCCAGAANRG				0	0	0	0	45.07	0	0	0	GTGCAGCATTAGTGGCCCCAGATAAGCAA	0.184586	0
DNA	1	chr14	93651100	-	3	ACAGAATAGAGAGCCCAGAAATAG	ACAGAATAGAGAGCCCAGAAATAG	GCAGCATAGTGAGCCCAGA-ANRG	GCAGCATAGTGAGCCCAGAANRG				0	0	0	0	40.89	0	0	0	GAACAGAATAGAGAGCCCAGAAATAGATC	0.117485	0
DNA	1	chr14	82323213	-	3	GCAGCACAGTGAGACCACACAAAG	GCAGCACAGTGAGACCACACAAAG	GCAGCATAGTGAGCCCAGA-ANRG	GCAGCATAGTGAGCCCAGAANRG				0	0	0	0	36.17	0	0	0	CAGCAGCACAGTGAGACCACACAAAGAGG	0.144952	0
DNA	1	chr14	38491656	-	3	ACAGAATAGGGAGCCCAGAAATAG	ACAGAATAGGGAGCCCAGAAATAG	GCAGCATAGTGAGCCCAGA-ANRG	GCAGCATAGTGAGCCCAGAANRG				0	0	0	0	40.89	0	0	0	GGACAGAATAGGGAGCCCAGAAATAGATC	0.115884	0
DNA	1	chr14	62194737	-	3	ACAGAATAGAGAGCCCAGAAATAG	ACAGAATAGAGAGCCCAGAAATAG	GCAGCATAGTGAGCCCAGA-ANRG	GCAGCATAGTGAGCCCAGAANRG				0	0	0	0	40.89	0	0	0	GAACAGAATAGAGAGCCCAGAAATAGACC	0.117788	0
DNA	1	chr14	104323081	-	3	CCGGCATGGATGAGCCCAGAAGGG	CCGGCATGGATGAGCCCAGAAGGG	GCAGCATAG-TGAGCCCAGAANRG	GCAGCATAGTGAGCCCAGAANRG				0	0	0	0	46.66	0	0	0	CGCCGGCATGGATGAGCCCAGAAGGGAGA	0.243858	0
DNA	1	chr14	38491656	-	3	ACAGAATAGGGAGCCCAGAAATAG	ACAGAATAGGGAGCCCAGAAATAG	GCAGCATAGTGAGCCCAG-AANRG	GCAGCATAGTGAGCCCAGAANRG				0	0	0	0	41.89	0	0	0	GGACAGAATAGGGAGCCCAGAAATAGATC	0.115884	0
DNA	1	chr14	103635262	-	3	GCAGCATAGTGAACTTCAGAGAAG	GCAGCATAGTGAACTTCAGAGAAG	GCAGCATAGTGAGC-CCAGAANRG	GCAGCATAGTGAGCCCAGAANRG				0	0	0	0	42.4	0	0	0	TAGCAGCATAGTGAACTTCAGAGAAGCCT	0.201994	0
DNA	1	chr14	65827340	-	3	GCAGCATCCTGAGCTACAGAAAGG	GCAGCATCCTGAGCTACAGAAAGG	GCAGCATAGTGAGC-CCAGAANRG	GCAGCATAGTGAGCCCAGAANRG				0	0	0	0	42.88	0	0	0	ATGCAGCATCCTGAGCTACAGAAAGGAAT	0.226567	0
DNA	1	chr14	46951764	+	3	GCAGCCTTGTGAGACCCAGAACAG	GCAGCCTTGTGAGACCCAGAACAG	GCAGCATAGTGAGC-CCAGAANRG	GCAGCATAGTGAGCCCAGAANRG				0	0	0	0	44.02	0	0	0	ACTGCAGCCTTGTGAGACCCAGAACAGAG	0.112477	0
DNA	1	chr14	62194737	-	3	ACAGAATAGAGAGCCCAGAAATAG	ACAGAATAGAGAGCCCAGAAATAG	GCAGCATAGTGAGCCCAG-AANRG	GCAGCATAGTGAGCCCAGAANRG				0	0	0	0	41.89	0	0	0	GAACAGAATAGAGAGCCCAGAAATAGACC	0.117788	0
DNA	1	chr14	65829385	+	3	GCAGCCTAGGTAGCCCAGCAAGGG	GCAGCCTAGGTAGCCCAGCAAGGG	GCAGCATAGTGAGCCCAG-AANRG	GCAGCATAGTGAGCCCAGAANRG				0	0	0	0	41.29	0	0	0	AATGCAGCCTAGGTAGCCCAGCAAGGGAC	0.325729	0
DNA	1	chr14	93651100	-	3	ACAGAATAGAGAGCCCAGAAATAG	ACAGAATAGAGAGCCCAGAAATAG	GCAGCATAGTGAGCCCAG-AANRG	GCAGCATAGTGAGCCCAGAANRG				0	0	0	0	41.89	0	0	0	GAACAGAATAGAGAGCCCAGAAATAGATC	0.117485	0
DNA	1	chr6	50393611	-	3	GCAAGGAGTGTGAGCCCAGAAGAG	GCAAGGAGTGTGAGCCCAGAAGAG	GC-AGCATAGTGAGCCCAGAANRG	GCAGCATAGTGAGCCCAGAANRG				0	0	0	0	46.72	0	0	0	TTGCAAGGAGTGTGAGCCCAGAAGAGCAC	0.107257	0
DNA	1	chr6	64356905	+	3	GCAAGCTTAATTAGCCCAGAATAG	GCAAGCTTAATTAGCCCAGAATAG	GC-AGCATAGTGAGCCCAGAANRG	GCAGCATAGTGAGCCCAGAANRG				0	0	0	0	46.02	0	0	0	TGAGCAAGCTTAATTAGCCCAGAATAGTT	0.131669	0
DNA	1	chr6	96322930	+	3	ACAGAATAGAGAGCCCAGAAATAG	ACAGAATAGAGAGCCCAGAAATAG	GCAGCATAGTGAGCCCAGA-ANRG	GCAGCATAGTGAGCCCAGAANRG				0	0	0	0	40.89	0	0	0	AGAACAGAATAGAGAGCCCAGAAATAGAC	0.453065	0
DNA	1	chr6	39630007	-	3	ACAGAATAGGGAGCCCAGAAATAG	ACAGAATAGGGAGCCCAGAAATAG	GCAGCATAGTGAGCCCAGA-ANRG	GCAGCATAGTGAGCCCAGAANRG				0	0	0	0	40.89	0	0	0	GAACAGAATAGGGAGCCCAGAAATAGACC	0.114275	0
DNA	1	chr6	34312646	-	3	GAACAATAGTGAGCCCAGAAATAG	GAACAATAGTGAGCCCAGAAATAG	GCAGCATAGTGAGCCCAGA-ANRG	GCAGCATAGTGAGCCCAGAANRG				0	0	0	0	41.21	0	0	0	TGGAACAATAGTGAGCCCAGAAATAGACC	0.120423	0
DNA	1	chr6	31522765	+	3	GCAGAATAGAGAGCCAAGAAATAG	GCAGAATAGAGAGCCAAGAAATAG	GCAGCATAGTGAGCCCAGA-ANRG	GCAGCATAGTGAGCCCAGAANRG				0	0	0	0	38.71	0	0	0	TGAGCAGAATAGAGAGCCAAGAAATAGTC	0.437928	0
DNA	1	chr6	2814812	-	3	GCAGAATAGAGAGTCCAGAAATAG	GCAGAATAGAGAGTCCAGAAATAG	GCAGCATAGTGAGCCCAGA-ANRG	GCAGCATAGTGAGCCCAGAANRG				0	0	0	0	39.71	0	0	0	GGGCAGAATAGAGAGTCCAGAAATAGACC	0.11263	0
DNA	1	chr6	97488320	-	3	ACAGAATAGAGAGCCCAGAAAAAG	ACAGAATAGAGAGCCCAGAAAAAG	GCAGCATAGTGAGCCCAGA-ANRG	GCAGCATAGTGAGCCCAGAANRG				0	0	0	0	40.89	0	0	0	GAACAGAATAGAGAGCCCAGAAAAAGACC	0.136235	0
DNA	1	chr6	103763089	+	3	ACAGAATAGAGAGCCCAGAAATAG	ACAGAATAGAGAGCCCAGAAATAG	GCAGCATAGTGAGCCCAGA-ANRG	GCAGCATAGTGAGCCCAGAANRG				0	0	0	0	40.89	0	0	0	GCAACAGAATAGAGAGCCCAGAAATAGAC	0.457114	0
DNA	1	chr6	109043968	+	3	ACAGAATAGAGAGCCCAGAAATAG	ACAGAATAGAGAGCCCAGAAATAG	GCAGCATAGTGAGCCCAGA-ANRG	GCAGCATAGTGAGCCCAGAANRG				0	0	0	0	40.89	0	0	0	GGAACAGAATAGAGAGCCCAGAAATAGAC	0.453381	0
DNA	1	chr6	111142186	+	3	ACAGAATAGAGAGCCCAGAAATAG	ACAGAATAGAGAGCCCAGAAATAG	GCAGCATAGTGAGCCCAGA-ANRG	GCAGCATAGTGAGCCCAGAANRG				0	0	0	0	40.89	0	0	0	GGAACAGAATAGAGAGCCCAGAAATAGAC	0.453381	0
DNA	1	chr6	131908136	+	3	GCGGCACAAGTGACCCCAGAAAAG	GCGGCACAAGTGACCCCAGAAAAG	GCAGCA-TAGTGAGCCCAGAANRG	GCAGCATAGTGAGCCCAGAANRG				0	0	0	0	45.75	0	0	0	GCTGCGGCACAAGTGACCCCAGAAAAGCC	0.0983084	0
DNA	1	chr6	44025190	-	3	GCAGCAGCAGTGTGCCCAGCAAAG	GCAGCAGCAGTGTGCCCAGCAAAG	GCAGCA-TAGTGAGCCCAGAANRG	GCAGCATAGTGAGCCCAGAANRG				0	0	0	0	40.1	0	0	0	GGGCAGCAGCAGTGTGCCCAGCAAAGGCT	0.126552	0
DNA	1	chr6	169548717	+	3	ACAGAATAGAGAGCCCAGAAATAG	ACAGAATAGAGAGCCCAGAAATAG	GCAGCATAGTGAGCCCAGA-ANRG	GCAGCATAGTGAGCCCAGAANRG				0	0	0	0	40.89	0	0	0	GGAACAGAATAGAGAGCCCAGAAATAGAC	0.453381	0
DNA	1	chr6	158138138	+	3	GCAGCATAGTGGGGCCAGTCACAG	GCAGCATAGTGGGGCCAGTCACAG	GCAGCATAGTGAGCCCAGA-ANRG	GCAGCATAGTGAGCCCAGAANRG				0	0	0	0	34.6	0	0	0	GCAGCAGCATAGTGGGGCCAGTCACAGTG	0.264439	0
DNA	1	chr6	135688970	-	2	GAAGCATAGAGAGCCCAGAAATAG	GAAGCATAGAGAGCCCAGAAATAG	GCAGCATAGTGAGCCCAGA-ANRG	GCAGCATAGTGAGCCCAGAANRG				0	0	0	0	41.07	0	0	0	GAGAAGCATAGAGAGCCCAGAAATAGACC	0.276662	0
DNA	1	chr6	127390498	-	3	ATAGCACAGTGAGCCCAGACAAAG	ATAGCACAGTGAGCCCAGACAAAG	GCAGCATAGTGAGCCCAGA-ANRG	GCAGCATAGTGAGCCCAGAANRG				0	0	0	0	41.22	0	0	0	TCATAGCACAGTGAGCCCAGACAAAGCAT	0.185702	0
DNA	1	chr6	120571649	+	3	GAAGCATAATGAGCCCTGAAAGAG	GAAGCATAATGAGCCCTGAAAGAG	GCAGCATAGTGAGCCCAGA-ANRG	GCAGCATAGTGAGCCCAGAANRG				0	0	0	0	38.22	0	0	0	AATGAAGCATAATGAGCCCTGAAAGAGCA	0.461522	0
DNA	1	chr6	115535125	-	3	GTAGAATAGAGAGCCCAGAAATAG	GTAGAATAGAGAGCCCAGAAATAG	GCAGCATAGTGAGCCCAGA-ANRG	GCAGCATAGTGAGCCCAGAANRG				0	0	0	0	40.88	0	0	0	GAGTAGAATAGAGAGCCCAGAAATAGAGC	0.122312	0
DNA	1	chr6	145521617	+	3	GCAGAGATTGTGAGCCCTGAAGGG	GCAGAGATTGTGAGCCCTGAAGGG	GCAG-CATAGTGAGCCCAGAANRG	GCAGCATAGTGAGCCCAGAANRG				0	0	0	0	42.95	0	0	0	CAAGCAGAGATTGTGAGCCCTGAAGGGGC	0.103363	0
RNA	1	chr6	88233942	+	2	GCAGCATAGAGAACCCA-AATGG	GCAGCATAGAGAACCCAAATGG	GCAGCATAGTGAGCCCAGAANRG	GCAGCATAGTGAGCCCAGAANRG				0	0	0	0	42.29	0	0	0	GGAGCAGCATAGAGAACCCAAATGGAAAT	0.331192	0
DNA	1	chr6	115535125	-	3	GTAGAATAGAGAGCCCAGAAATAG	GTAGAATAGAGAGCCCAGAAATAG	GCAGCATAGTGAGCCCAG-AANRG	GCAGCATAGTGAGCCCAGAANRG				0	0	0	0	41.88	0	0	0	GAGTAGAATAGAGAGCCCAGAAATAGAGC	0.122312	0
DNA	1	chr6	111142186	+	3	ACAGAATAGAGAGCCCAGAAATAG	ACAGAATAGAGAGCCCAGAAATAG	GCAGCATAGTGAGCCCAG-AANRG	GCAGCATAGTGAGCCCAGAANRG				0	0	0	0	41.89	0	0	0	GGAACAGAATAGAGAGCCCAGAAATAGAC	0.453381	0
DNA	1	chr6	109043968	+	3	ACAGAATAGAGAGCCCAGAAATAG	ACAGAATAGAGAGCCCAGAAATAG	GCAGCATAGTGAGCCCAG-AANRG	GCAGCATAGTGAGCCCAGAANRG				0	0	0	0	41.89	0	0	0	GGAACAGAATAGAGAGCCCAGAAATAGAC	0.453381	0
DNA	1	chr6	103763089	+	3	ACAGAATAGAGAGCCCAGAAATAG	ACAGAATAGAGAGCCCAGAAATAG	GCAGCATAGTGAGCCCAG-AANRG	GCAGCATAGTGAGCCCAGAANRG				0	0	0	0	41.89	0	0	0	GCAACAGAATAGAGAGCCCAGAAATAGAC	0.457114	0
DNA	1	chr6	97488320	-	3	ACAGAATAGAGAGCCCAGAAAAAG	ACAGAATAGAGAGCCCAGAAAAAG	GCAGCATAGTGAGCCCAG-AANRG	GCAGCATAGTGAGCCCAGAANRG				0	0	0	0	41.89	0	0	0	GAACAGAATAGAGAGCCCAGAAAAAGACC	0.136235	0
DNA	1	chr6	96322930	+	3	ACAGAATAGAGAGCCCAGAAATAG	ACAGAATAGAGAGCCCAGAAATAG	GCAGCATAGTGAGCCCAG-AANRG	GCAGCATAGTGAGCCCAGAANRG				0	0	0	0	41.89	0	0	0	AGAACAGAATAGAGAGCCCAGAAATAGAC	0.453065	0
DNA	1	chr6	39630007	-	3	ACAGAATAGGGAGCCCAGAAATAG	ACAGAATAGGGAGCCCAGAAATAG	GCAGCATAGTGAGCCCAG-AANRG	GCAGCATAGTGAGCCCAGAANRG				0	0	0	0	41.89	0	0	0	GAACAGAATAGGGAGCCCAGAAATAGACC	0.114275	0
DNA	1	chr6	34312646	-	3	GAACAATAGTGAGCCCAGAAATAG	GAACAATAGTGAGCCCAGAAATAG	GCAGCATAGTGAGCCCAG-AANRG	GCAGCATAGTGAGCCCAGAANRG				0	0	0	0	42.21	0	0	0	TGGAACAATAGTGAGCCCAGAAATAGACC	0.120423	0
DNA	1	chr6	31522765	+	3	GCAGAATAGAGAGCCAAGAAATAG	GCAGAATAGAGAGCCAAGAAATAG	GCAGCATAGTGAGCCCAG-AANRG	GCAGCATAGTGAGCCCAGAANRG				0	0	0	0	39.71	0	0	0	TGAGCAGAATAGAGAGCCAAGAAATAGTC	0.437928	0
DNA	1	chr6	2814812	-	3	GCAGAATAGAGAGTCCAGAAATAG	GCAGAATAGAGAGTCCAGAAATAG	GCAGCATAGTGAGCCCAG-AANRG	GCAGCATAGTGAGCCCAGAANRG				0	0	0	0	40.71	0	0	0	GGGCAGAATAGAGAGTCCAGAAATAGACC	0.11263	0
DNA	1	chr6	2262608	-	3	ACAGAATAGAGAGCCCAGGAATAG	ACAGAATAGAGAGCCCAGGAATAG	GCAGCATAGTGAGCCCAG-AANRG	GCAGCATAGTGAGCCCAGAANRG				0	0	0	0	41.89	0	0	0	GAACAGAATAGAGAGCCCAGGAATAGAAC	0.123968	0
DNA	1	chr6	120571649	+	3	GAAGCATAATGAGCCCTGAAAGAG	GAAGCATAATGAGCCCTGAAAGAG	GCAGCATAGTGAGCCCAG-AANRG	GCAGCATAGTGAGCCCAGAANRG				0	0	0	0	39.22	0	0	0	AATGAAGCATAATGAGCCCTGAAAGAGCA	0.461522	0
DNA	1	chr6	135688970	-	2	GAAGCATAGAGAGCCCAGAAATAG	GAAGCATAGAGAGCCCAGAAATAG	GCAGCATAGTGAGCCCAG-AANRG	GCAGCATAGTGAGCCCAGAANRG				0	0	0	0	42.07	0	0	0	GAGAAGCATAGAGAGCCCAGAAATAGACC	0.276662	0
DNA	1	chr6	158138138	+	3	GCAGCATAGTGGGGCCAGTCACAG	GCAGCATAGTGGGGCCAGTCACAG	GCAGCATAGTGAGCCCAG-AANRG	GCAGCATAGTGAGCCCAGAANRG				0	0	0	0	34.6	0	0	0	GCAGCAGCATAGTGGGGCCAGTCACAGTG	0.264439	0
DNA	1	chr6	169548717	+	3	ACAGAATAGAGAGCCCAGAAATAG	ACAGAATAGAGAGCCCAGAAATAG	GCAGCATAGTGAGCCCAG-AANRG	GCAGCATAGTGAGCCCAGAANRG				0	0	0	0	41.89	0	0	0	GGAACAGAATAGAGAGCCCAGAAATAGAC	0.453381	0
DNA	1	chr6	131908136	+	3	GCGGCACAAGTGACCCCAGAAAAG	GCGGCACAAGTGACCCCAGAAAAG	GCAGCAT-AGTGAGCCCAGAANRG	GCAGCATAGTGAGCCCAGAANRG				0	0	0	0	45.75	0	0	0	GCTGCGGCACAAGTGACCCCAGAAAAGCC	0.0983084	0
DNA	1	chr6	93949052	+	3	GCACAATAAGTGAGCCCAGAGTGG	GCACAATAAGTGAGCCCAGAGTGG	GCAGCAT-AGTGAGCCCAGAANRG	GCAGCATAGTGAGCCCAGAANRG				0	0	0	0	47.07	0	0	0	AAAGCACAATAAGTGAGCCCAGAGTGGAG	0.140139	0
DNA	1	chr6	44025190	-	3	GCAGCAGCAGTGTGCCCAGCAAAG	GCAGCAGCAGTGTGCCCAGCAAAG	GCAGCAT-AGTGAGCCCAGAANRG	GCAGCATAGTGAGCCCAGAANRG				0	0	0	0	40.1	0	0	0	GGGCAGCAGCAGTGTGCCCAGCAAAGGCT	0.126552	0
DNA	1	chr6	29307141	-	3	GCAGCATGCATGAGCCCAGAGAGG	GCAGCATGCATGAGCCCAGAGAGG	GCAGCAT-AGTGAGCCCAGAANRG	GCAGCATAGTGAGCCCAGAANRG				0	0	0	0	46.58	0	0	0	TGGCAGCATGCATGAGCCCAGAGAGGCCC	0.286673	0
DNA	1	chr6	135688970	-	3	GAAGCATAGAGAGCCCAGAAATAG	GAAGCATAGAGAGCCCAGAAATAG	GCAGCATAGTGAGCCCA-GAANRG	GCAGCATAGTGAGCCCAGAANRG				0	0	0	0	38.07	0	0	0	GAGAAGCATAGAGAGCCCAGAAATAGACC	0.276662	0
DNA	1	chr6	125170955	-	3	GCAGCATAGTCTACCCACGAAAGG	GCAGCATAGTCTACCCACGAAAGG	GCAGCATAGTGAGCCCA-GAANRG	GCAGCATAGTGAGCCCAGAANRG				0	0	0	0	41.1	0	0	0	TGGCAGCATAGTCTACCCACGAAAGGCTC	0.25374	0
DNA	1	chr6	2262608	-	3	ACAGAATAGAGAGCCCAGGAATAG	ACAGAATAGAGAGCCCAGGAATAG	GCAGCATAGTGAGCCCA-GAANRG	GCAGCATAGTGAGCCCAGAANRG				0	0	0	0	42.89	0	0	0	GAACAGAATAGAGAGCCCAGGAATAGAAC	0.123968	0
DNA	1	chr6	145521617	+	3	GCAGAGATTGTGAGCCCTGAAGGG	GCAGAGATTGTGAGCCCTGAAGGG	GCAGC-ATAGTGAGCCCAGAANRG	GCAGCATAGTGAGCCCAGAANRG				0	0	0	0	42.95	0	0	0	CAAGCAGAGATTGTGAGCCCTGAAGGGGC	0.103363	0
DNA	1	chr6	131908136	+	3	GCGGCACAAGTGACCCCAGAAAAG	GCGGCACAAGTGACCCCAGAAAAG	GCAGCATA-GTGAGCCCAGAANRG	GCAGCATAGTGAGCCCAGAANRG				0	0	0	0	45.67	0	0	0	GCTGCGGCACAAGTGACCCCAGAAAAGCC	0.0983084	0
DNA	1	chr6	93949052	+	3	GCACAATAAGTGAGCCCAGAGTGG	GCACAATAAGTGAGCCCAGAGTGG	GCAGCATA-GTGAGCCCAGAANRG	GCAGCATAGTGAGCCCAGAANRG				0	0	0	0	46.99	0	0	0	AAAGCACAATAAGTGAGCCCAGAGTGGAG	0.140139	0
DNA	1	chr6	29307141	-	3	GCAGCATGCATGAGCCCAGAGAGG	GCAGCATGCATGAGCCCAGAGAGG	GCAGCATA-GTGAGCCCAGAANRG	GCAGCATAGTGAGCCCAGAANRG				0	0	0	0	46.58	0	0	0	TGGCAGCATGCATGAGCCCAGAGAGGCCC	0.286673	0
DNA	1	chr6	14316564	-	3	GCAGCATATGTGCCCCAAGAAAGG	GCAGCATATGTGCCCCAAGAAAGG	GCAGCATA-GTGAGCCCAGAANRG	GCAGCATAGTGAGCCCAGAANRG				0	0	0	0	41.95	0	0	0	CTGCAGCATATGTGCCCCAAGAAAGGGCA	0.180604	0
RNA	1	chr6	113559595	+	2	GCAGCCTAGTTAG-CCAGAAAGG	GCAGCCTAGTTAGCCAGAAAGG	GCAGCATAGTGAGCCCAGAANRG	GCAGCATAGTGAGCCCAGAANRG				0	0	0	0	45.68	0	0	0	AATGCAGCCTAGTTAGCCAGAAAGGAAAA	0.0668775	0
RNA	1	chr6	113559595	+	2	GCAGCCTAGTTAGC-CAGAAAGG	GCAGCCTAGTTAGCCAGAAAGG	GCAGCATAGTGAGCCCAGAANRG	GCAGCATAGTGAGCCCAGAANRG				0	0	0	0	45.08	0	0	0	AATGCAGCCTAGTTAGCCAGAAAGGAAAA	0.0668775	0
RNA	1	chr6	113559595	+	2	GCAGCCTAGTTAGCC-AGAAAGG	GCAGCCTAGTTAGCCAGAAAGG	GCAGCATAGTGAGCCCAGAANRG	GCAGCATAGTGAGCCCAGAANRG				0	0	0	0	44.68	0	0	0	AATGCAGCCTAGTTAGCCAGAAAGGAAAA	0.0668775	0
RNA	1	chr6	33902968	-	2	GCAGCCT-GTGAGCCCAGAGGGG	GCAGCCTGTGAGCCCAGAGGGG	GCAGCATAGTGAGCCCAGAANRG	GCAGCATAGTGAGCCCAGAANRG				0	0	0	0	41.41	0	0	0	GGTAGCAGCCTGTGAGCCCAGAGGGGATT	0.318363	0
DNA	1	chr20	47362606	-	3	GGAGCAGAGTGAGCCACAGGAGGG	GGAGCAGAGTGAGCCACAGGAGGG	GCAGCATAGTGAGCC-CAGAANRG	GCAGCATAGTGAGCCCAGAANRG				0	0	0	0	39.04	0	0	0	CCGGAGCAGAGTGAGCCACAGGAGGGTGG	0.187629	0
DNA	1	chr20	46141704	-	3	GCAGCATTGGGGAGCCCAGAGGAG	GCAGCATTGGGGAGCCCAGAGGAG	GCAGCATAGT-GAGCCCAGAANRG	GCAGCATAGTGAGCCCAGAANRG				0	0	0	0	46.23	0	0	0	ATGCAGCATTGGGGAGCCCAGAGGAGAAG	0.130619	0
DNA	1	chr20	33277710	-	3	GCAGCTCAGTGGGGCCCAGAAGGG	GCAGCTCAGTGGGGCCCAGAAGGG	GCAGCATAGT-GAGCCCAGAANRG	GCAGCATAGTGAGCCCAGAANRG				0	0	0	0	45.46	0	0	0	TGGCAGCTCAGTGGGGCCCAGAAGGGGAT	0.25599	0
DNA	1	chr20	33277710	-	3	GCAGCTCAGTGGGGCCCAGAAGGG	GCAGCTCAGTGGGGCCCAGAAGGG	GCAGCATAGTGA-GCCCAGAANRG	GCAGCATAGTGAGCCCAGAANRG				0	0	0	0	45.36	0	0	0	TGGCAGCTCAGTGGGGCCCAGAAGGGGAT	0.25599	0
DNA	1	chr20	46197083	+	3	GACAGCAGAGAGTGCCCAGAAAAG	GACAGCAGAGAGTGCCCAGAAAAG	G-CAGCATAGTGAGCCCAGAANRG	GCAGCATAGTGAGCCCAGAANRG				0	0	0	0	45.5	0	0	0	TCAGACAGCAGAGAGTGCCCAGAAAAGGG	0.0594997	0
DNA	1	chr20	36291330	-	3	ACAGAATAGAGAGCCCAGAAATAG	ACAGAATAGAGAGCCCAGAAATAG	GCAGCATAGTGAGCCCAGA-ANRG	GCAGCATAGTGAGCCCAGAANRG				0	0	0	0	40.89	0	0	0	GAACAGAATAGAGAGCCCAGAAATAGACC	0.117788	0
DNA	1	chr20	33165528	-	3	GCAGCCTACTGAGACCAGAGAAAG	GCAGCCTACTGAGACCAGAGAAAG	GCAGCATAGTGAGCCCAGA-ANRG	GCAGCATAGTGAGCCCAGAANRG				0	0	0	0	39.84	0	0	0	ATGCAGCCTACTGAGACCAGAGAAAGCGA	0.101071	0
DNA	1	chr20	18109287	-	3	ACAGAATAGTAAGCCCAGAAATAG	ACAGAATAGTAAGCCCAGAAATAG	GCAGCATAGTGAGCCCAGA-ANRG	GCAGCATAGTGAGCCCAGAANRG				0	0	0	0	40.69	0	0	0	GGACAGAATAGTAAGCCCAGAAATAGACC	0.14179	0
DNA	1	chr20	18205959	+	3	ACAGAATAGGGAGCCCAGAAATAG	ACAGAATAGGGAGCCCAGAAATAG	GCAGCATAGTGAGCCCAGA-ANRG	GCAGCATAGTGAGCCCAGAANRG				0	0	0	0	40.89	0	0	0	GAAACAGAATAGGGAGCCCAGAAATAGAC	0.459087	0
DNA	1	chr20	1201619	-	3	TTAGCATAGTGACCCCAGATAAAG	TTAGCATAGTGACCCCAGATAAAG	GCAGCATAGTGAGCCCAGA-ANRG	GCAGCATAGTGAGCCCAGAANRG				0	0	0	0	40.35	0	0	0	AATTAGCATAGTGACCCCAGATAAAGATG	0.131487	0
DNA	1	chr20	36779985	+	3	GAAGCAGACTGAGCCCAGAGAAAG	GAAGCAGACTGAGCCCAGAGAAAG	GCAGCATAGTGAGCCCAGA-ANRG	GCAGCATAGTGAGCCCAGAANRG				0	0	0	0	40.99	0	0	0	TGGGAAGCAGACTGAGCCCAGAGAAAGGA	0.141635	0
DNA	1	chr20	47996482	-	3	ACAGAATAGAGAGCCCAGAAATAG	ACAGAATAGAGAGCCCAGAAATAG	GCAGCATAGTGAGCCCAGA-ANRG	GCAGCATAGTGAGCCCAGAANRG				0	0	0	0	40.89	0	0	0	AAACAGAATAGAGAGCCCAGAAATAGACC	0.116496	0
DNA	1	chr20	48295065	-	3	TCAGCATAGTGAGCACAGACCCAG	TCAGCATAGTGAGCACAGACCCAG	GCAGCATAGTGAGCCCAGA-ANRG	GCAGCATAGTGAGCCCAGAANRG				0	0	0	0	39.68	0	0	0	GATCAGCATAGTGAGCACAGACCCAGGGC	0.161355	0
DNA	1	chr20	46141704	-	3	GCAGCATTGGGGAGCCCAGAGGAG	GCAGCATTGGGGAGCCCAGAGGAG	GCAGCA-TAGTGAGCCCAGAANRG	GCAGCATAGTGAGCCCAGAANRG				0	0	0	0	46.42	0	0	0	ATGCAGCATTGGGGAGCCCAGAGGAGAAG	0.130619	0
DNA	1	chr20	37205258	-	3	GAAGCAATTGTGAGCCCAGAGAAG	GAAGCAATTGTGAGCCCAGAGAAG	GCAGCA-TAGTGAGCCCAGAANRG	GCAGCATAGTGAGCCCAGAANRG				0	0	0	0	46.99	0	0	0	GAGAAGCAATTGTGAGCCCAGAGAAGGAT	0.103027	0
DNA	1	chr20	46141704	-	3	GCAGCATTGGGGAGCCCAGAGGAG	GCAGCATTGGGGAGCCCAGAGGAG	GCAGCATAGTG-AGCCCAGAANRG	GCAGCATAGTGAGCCCAGAANRG				0	0	0	0	46.13	0	0	0	ATGCAGCATTGGGGAGCCCAGAGGAGAAG	0.130619	0
DNA	1	chr20	33277710	-	3	GCAGCTCAGTGGGGCCCAGAAGGG	GCAGCTCAGTGGGGCCCAGAAGGG	GCAGCATAGTG-AGCCCAGAANRG	GCAGCATAGTGAGCCCAGAANRG				0	0	0	0	45.36	0	0	0	TGGCAGCTCAGTGGGGCCCAGAAGGGGAT	0.25599	0
DNA	1	chr20	46141704	-	3	GCAGCATTGGGGAGCCCAGAGGAG	GCAGCATTGGGGAGCCCAGAGGAG	GCAGCATA-GTGAGCCCAGAANRG	GCAGCATAGTGAGCCCAGAANRG				0	0	0	0	46.38	0	0	0	ATGCAGCATTGGGGAGCCCAGAGGAGAAG	0.130619	0
DNA	1	chr20	12288706	+	3	GCTGCATAAGTGACCCCAGACTAG	GCTGCATAAGTGACCCCAGACTAG	GCAGCATA-GTGAGCCCAGAANRG	GCAGCATAGTGAGCCCAGAANRG				0	0	0	0	45.9	0	0	0	CAAGCTGCATAAGTGACCCCAGACTAGAC	0.142889	0
DNA	1	chr20	7700547	+	3	GCAGAATATGTGATCACAGAATAG	GCAGAATATGTGATCACAGAATAG	GCAGCATA-GTGAGCCCAGAANRG	GCAGCATAGTGAGCCCAGAANRG				0	0	0	0	43.56	0	0	0	GCAGCAGAATATGTGATCACAGAATAGAA	0.122952	0
DNA	1	chr20	37205258	-	3	GAAGCAATTGTGAGCCCAGAGAAG	GAAGCAATTGTGAGCCCAGAGAAG	GCAGC-ATAGTGAGCCCAGAANRG	GCAGCATAGTGAGCCCAGAANRG				0	0	0	0	47.01	0	0	0	GAGAAGCAATTGTGAGCCCAGAGAAGGAT	0.103027	0
DNA	1	chr9	5653251	-	3	ACAGAATAGAGAGCCCAGAAATAG	ACAGAATAGAGAGCCCAGAAATAG	GCAGCATAGTGAGCCCAG-AANRG	GCAGCATAGTGAGCCCAGAANRG				0	0	0	0	41.89	0	0	0	GAACAGAATAGAGAGCCCAGAAATAGACA	0.117766	0
DNA	1	chr9	104621625	+	3	GCAGCTTATTGAGCAACAGAAGAG	GCAGCTTATTGAGCAACAGAAGAG	GCAGCATAGTGAGC-CCAGAANRG	GCAGCATAGTGAGCCCAGAANRG				0	0	0	0	42.94	0	0	0	TTGGCAGCTTATTGAGCAACAGAAGAGAG	0.103026	0
DNA	1	chr9	34871717	-	3	ACAGAATAGAGAGCCCAGAAACAG	ACAGAATAGAGAGCCCAGAAACAG	GCAGCATAGTGAGCCCAG-AANRG	GCAGCATAGTGAGCCCAGAANRG				0	0	0	0	41.89	0	0	0	GAACAGAATAGAGAGCCCAGAAACAGATC	0.136415	0
DNA	1	chr9	34952680	+	3	GCAGAATAGAGAGTCCAGGAATAG	GCAGAATAGAGAGTCCAGGAATAG	GCAGCATAGTGAGCCCAG-AANRG	GCAGCATAGTGAGCCCAGAANRG				0	0	0	0	40.71	0	0	0	ACAGCAGAATAGAGAGTCCAGGAATAGAC	0.26274	0
DNA	1	chr9	36151783	-	3	GGAGCCTGGTGAGCCCAGCAAAAG	GGAGCCTGGTGAGCCCAGCAAAAG	GCAGCATAGTGAGCCCAG-AANRG	GCAGCATAGTGAGCCCAGAANRG				0	0	0	0	42.09	0	0	0	AAGGAGCCTGGTGAGCCCAGCAAAAGGCA	0.106749	0
DNA	1	chr9	80982614	-	3	GCAGAATAGAGAGTCCAGAAATAG	GCAGAATAGAGAGTCCAGAAATAG	GCAGCATAGTGAGCCCAG-AANRG	GCAGCATAGTGAGCCCAGAANRG				0	0	0	0	40.71	0	0	0	GAGCAGAATAGAGAGTCCAGAAATAGGCT	0.110447	0
DNA	1	chr9	134301968	-	3	GCAGCCTGGTGAGCTCAGGAAGGG	GCAGCCTGGTGAGCTCAGGAAGGG	GCAGCATAGTGAGCCCAG-AANRG	GCAGCATAGTGAGCCCAGAANRG				0	0	0	0	40.32	0	0	0	CCGCAGCCTGGTGAGCTCAGGAAGGGCCT	0.222599	0
DNA	1	chr9	95392045	-	3	GCAGAATAGAGAACCCAGAAATAG	GCAGAATAGAGAACCCAGAAATAG	GCAGCATAGTGAGCCCAG-AANRG	GCAGCATAGTGAGCCCAGAANRG				0	0	0	0	40.91	0	0	0	GAGCAGAATAGAGAACCCAGAAATAGAGC	0.116533	0
DNA	1	chr9	88981812	-	3	ACAGAATAGAGAGCCCAGAAATAG	ACAGAATAGAGAGCCCAGAAATAG	GCAGCATAGTGAGCCCAG-AANRG	GCAGCATAGTGAGCCCAGAANRG				0	0	0	0	41.89	0	0	0	GAACAGAATAGAGAGCCCAGAAATAGCCC	0.110663	0
DNA	1	chr9	85102826	-	3	ACTGCATAGTGAACCCAGAAATAG	ACTGCATAGTGAACCCAGAAATAG	GCAGCATAGTGAGCCCAG-AANRG	GCAGCATAGTGAGCCCAGAANRG				0	0	0	0	41.33	0	0	0	GAACTGCATAGTGAACCCAGAAATAGACC	0.137161	0
DNA	1	chr9	119841575	+	3	GATGCATAAGTGAGCCCAGCAGAG	GATGCATAAGTGAGCCCAGCAGAG	GCAGCAT-AGTGAGCCCAGAANRG	GCAGCATAGTGAGCCCAGAANRG				0	0	0	0	41.15	0	0	0	AGGGATGCATAAGTGAGCCCAGCAGAGCT	0.128173	0
RNA	1	chr9	8441964	-	2	GCTGCATAGAGAGCCCA-AACAG	GCTGCATAGAGAGCCCAAACAG	GCAGCATAGTGAGCCCAGAANRG	GCAGCATAGTGAGCCCAGAANRG				0	0	0	0	43.24	0	0	0	TCTTGCTGCATAGAGAGCCCAAACAGTCT	0.196182	0
RNA	1	chr9	32754496	-	2	GCAGCATGGTGA-CCCAGCAGGG	GCAGCATGGTGACCCAGCAGGG	GCAGCATAGTGAGCCCAGAANRG	GCAGCATAGTGAGCCCAGAANRG				0	0	0	0	41.52	0	0	0	ATGGGCAGCATGGTGACCCAGCAGGGAGG	0.274678	0
RNA	1	chr9	19473834	-	2	GCAGCCTAGAGA-CCCAGAAGAG	GCAGCCTAGAGACCCAGAAGAG	GCAGCATAGTGAGCCCAGAANRG	GCAGCATAGTGAGCCCAGAANRG				0	0	0	0	46.08	0	0	0	GCTGGCAGCCTAGAGACCCAGAAGAGTCT	0.20328	0
DNA	1	chr9	132156401	-	2	GCAGCAAAGCTTAGCCCAGAAGAG	GCAGCAAAGCTTAGCCCAGAAGAG	GCAGCATAG-TGAGCCCAGAANRG	GCAGCATAGTGAGCCCAGAANRG				0	0	0	0	46.17	0	0	0	AAGCAGCAAAGCTTAGCCCAGAAGAGCCC	0.304884	0
DNA	1	chr9	79564688	+	3	ACAACATAGATGAGACCAGAAAGG	ACAACATAGATGAGACCAGAAAGG	GCAGCATAG-TGAGCCCAGAANRG	GCAGCATAGTGAGCCCAGAANRG				0	0	0	0	45.01	0	0	0	AACACAACATAGATGAGACCAGAAAGGTT	0.114554	0
DNA	1	chr9	98209845	-	3	GCAACAGAGTGAGGCCCTGAAAAG	GCAACAGAGTGAGGCCCTGAAAAG	GCAGCATAGTGAG-CCCAGAANRG	GCAGCATAGTGAGCCCAGAANRG				0	0	0	0	42	0	0	0	GGGCAACAGAGTGAGGCCCTGAAAAGAAA	0.124326	0
DNA	1	chr14	88029426	-	3	GCTGGACAGTGAGCCCAAGAAAAG	GCTGGACAGTGAGCCCAAGAAAAG	GCAGCATAGTGAGCCCA-GAANRG	GCAGCATAGTGAGCCCAGAANRG				0	0	0	0	43.13	0	0	0	ATGCTGGACAGTGAGCCCAAGAAAAGGGT	0.116933	0
DNA	1	chr14	46951764	+	3	GCAGCCTTGTGAGACCCAGAACAG	GCAGCCTTGTGAGACCCAGAACAG	GCAGCATAGTGAGCC-CAGAANRG	GCAGCATAGTGAGCCCAGAANRG				0	0	0	0	43.62	0	0	0	ACTGCAGCCTTGTGAGACCCAGAACAGAG	0.112477	0
DNA	1	chr14	103635262	-	3	GCAGCATAGTGAACTTCAGAGAAG	GCAGCATAGTGAACTTCAGAGAAG	GCAGCATAGTGAGCC-CAGAANRG	GCAGCATAGTGAGCCCAGAANRG				0	0	0	0	42.4	0	0	0	TAGCAGCATAGTGAACTTCAGAGAAGCCT	0.201994	0
DNA	1	chr14	65827340	-	3	GCAGCATCCTGAGCTACAGAAAGG	GCAGCATCCTGAGCTACAGAAAGG	GCAGCATAGTGAGCC-CAGAANRG	GCAGCATAGTGAGCCCAGAANRG				0	0	0	0	42.88	0	0	0	ATGCAGCATCCTGAGCTACAGAAAGGAAT	0.226567	0
DNA	1	chr14	88029426	-	3	GCTGGACAGTGAGCCCAAGAAAAG	GCTGGACAGTGAGCCCAAGAAAAG	GCAGCATAGTGAGCCC-AGAANRG	GCAGCATAGTGAGCCCAGAANRG				0	0	0	0	44.13	0	0	0	ATGCTGGACAGTGAGCCCAAGAAAAGGGT	0.116933	0
DNA	1	chr14	46951764	+	3	GCAGCCTTGTGAGACCCAGAACAG	GCAGCCTTGTGAGACCCAGAACAG	GCAGCATAGTGAGCCC-AGAANRG	GCAGCATAGTGAGCCCAGAANRG				0	0	0	0	42.92	0	0	0	ACTGCAGCCTTGTGAGACCCAGAACAGAG	0.112477	0
DNA	1	chr14	70398209	+	3	GCAGCCACAGACAGCCCAGAAAAG	GCAGCCACAGACAGCCCAGAAAAG	GCAGC-ATAGTGAGCCCAGAANRG	GCAGCATAGTGAGCCCAGAANRG				0	0	0	0	45.72	0	0	0	TGGGCAGCCACAGACAGCCCAGAAAAGGC	0.100808	0
DNA	1	chr14	80269384	+	3	GCAGCATCCGTGAGAACAGAAAAG	GCAGCATCCGTGAGAACAGAAAAG	GCAGCATA-GTGAGCCCAGAANRG	GCAGCATAGTGAGCCCAGAANRG				0	0	0	0	42.88	0	0	0	ATTGCAGCATCCGTGAGAACAGAAAAGAG	0.0924372	0
DNA	1	chr14	76121080	-	3	GCAGCAGATGTGAGCCCTGGAAGG	GCAGCAGATGTGAGCCCTGGAAGG	GCAGCATA-GTGAGCCCAGAANRG	GCAGCATAGTGAGCCCAGAANRG				0	0	0	0	37.12	0	0	0	AGGCAGCAGATGTGAGCCCTGGAAGGAAC	0.171624	0
DNA	1	chr20	47996482	-	3	ACAGAATAGAGAGCCCAGAAATAG	ACAGAATAGAGAGCCCAGAAATAG	GCAGCATAGTGAGCCCAG-AANRG	GCAGCATAGTGAGCCCAGAANRG				0	0	0	0	41.89	0	0	0	AAACAGAATAGAGAGCCCAGAAATAGACC	0.116496	0
DNA	1	chr20	36291330	-	3	ACAGAATAGAGAGCCCAGAAATAG	ACAGAATAGAGAGCCCAGAAATAG	GCAGCATAGTGAGCCCAG-AANRG	GCAGCATAGTGAGCCCAGAANRG				0	0	0	0	41.89	0	0	0	GAACAGAATAGAGAGCCCAGAAATAGACC	0.117788	0
DNA	1	chr20	18109287	-	3	ACAGAATAGTAAGCCCAGAAATAG	ACAGAATAGTAAGCCCAGAAATAG	GCAGCATAGTGAGCCCAG-AANRG	GCAGCATAGTGAGCCCAGAANRG				0	0	0	0	41.69	0	0	0	GGACAGAATAGTAAGCCCAGAAATAGACC	0.14179	0
DNA	1	chr20	18205959	+	3	ACAGAATAGGGAGCCCAGAAATAG	ACAGAATAGGGAGCCCAGAAATAG	GCAGCATAGTGAGCCCAG-AANRG	GCAGCATAGTGAGCCCAGAANRG				0	0	0	0	41.89	0	0	0	GAAACAGAATAGGGAGCCCAGAAATAGAC	0.459087	0
DNA	1	chr20	46141704	-	3	GCAGCATTGGGGAGCCCAGAGGAG	GCAGCATTGGGGAGCCCAGAGGAG	GCAGCAT-AGTGAGCCCAGAANRG	GCAGCATAGTGAGCCCAGAANRG				0	0	0	0	46.38	0	0	0	ATGCAGCATTGGGGAGCCCAGAGGAGAAG	0.130619	0
DNA	1	chr20	12288706	+	3	GCTGCATAAGTGACCCCAGACTAG	GCTGCATAAGTGACCCCAGACTAG	GCAGCAT-AGTGAGCCCAGAANRG	GCAGCATAGTGAGCCCAGAANRG				0	0	0	0	45.98	0	0	0	CAAGCTGCATAAGTGACCCCAGACTAGAC	0.142889	0
RNA	1	chr20	1825998	-	2	GCT-CAAAGTGAGCCCAGAATGG	GCTCAAAGTGAGCCCAGAATGG	GCAGCATAGTGAGCCCAGAANRG	GCAGCATAGTGAGCCCAGAANRG				0	0	0	0	47.34	0	0	0	GCAGGCTCAAAGTGAGCCCAGAATGGGTG	0.336813	0
DNA	1	chr14	55463330	+	3	AACAGCATAGTGAACCCAGGAGGG	AACAGCATAGTGAACCCAGGAGGG	G-CAGCATAGTGAGCCCAGAANRG	GCAGCATAGTGAGCCCAGAANRG				0	0	0	0	40.15	0	0	0	GAAAACAGCATAGTGAACCCAGGAGGGAG	0.178278	0
DNA	1	chr14	55921860	+	3	GCATTCATAGTGAGCTTAGAAGGG	GCATTCATAGTGAGCTTAGAAGGG	GCA-GCATAGTGAGCCCAGAANRG	GCAGCATAGTGAGCCCAGAANRG				0	0	0	0	42.04	0	0	0	AATGCATTCATAGTGAGCTTAGAAGGGGC	0.142023	0
DNA	1	chr14	91373038	+	3	GTCACCACAGTGAGCCCATAAAGG	GTCACCACAGTGAGCCCATAAAGG	G-CAGCATAGTGAGCCCAGAANRG	GCAGCATAGTGAGCCCAGAANRG				0	0	0	0	42.11	0	0	0	ACAGTCACCACAGTGAGCCCATAAAGGAA	0.0608582	0
DNA	1	chr14	46951764	+	3	GCAGCCTTGTGAGACCCAGAACAG	GCAGCCTTGTGAGACCCAGAACAG	GCAGCATAGTGA-GCCCAGAANRG	GCAGCATAGTGAGCCCAGAANRG				0	0	0	0	44.82	0	0	0	ACTGCAGCCTTGTGAGACCCAGAACAGAG	0.112477	0
RNA	1	chr20	48677238	+	2	GCAGCAGAG-GAGCCCAGGAGGG	GCAGCAGAGGAGCCCAGGAGGG	GCAGCATAGTGAGCCCAGAANRG	GCAGCATAGTGAGCCCAGAANRG				0	0	0	0	42.16	0	0	0	GCAGCAGCAGAGGAGCCCAGGAGGGCGGA	0.18508	0
RNA	1	chr20	1825998	-	2	GC-TCAAAGTGAGCCCAGAATGG	GCTCAAAGTGAGCCCAGAATGG	GCAGCATAGTGAGCCCAGAANRG	GCAGCATAGTGAGCCCAGAANRG				0	0	0	0	47.34	0	0	0	GCAGGCTCAAAGTGAGCCCAGAATGGGTG	0.336813	0
DNA	1	chr20	33277710	-	3	GCAGCTCAGTGGGGCCCAGAAGGG	GCAGCTCAGTGGGGCCCAGAAGGG	GCAGCATAGTGAG-CCCAGAANRG	GCAGCATAGTGAGCCCAGAANRG				0	0	0	0	45.16	0	0	0	TGGCAGCTCAGTGGGGCCCAGAAGGGGAT	0.25599	0
DNA	1	chr20	46141704	-	3	GCAGCATTGGGGAGCCCAGAGGAG	GCAGCATTGGGGAGCCCAGAGGAG	GCAGCATAG-TGAGCCCAGAANRG	GCAGCATAGTGAGCCCAGAANRG				0	0	0	0	46.23	0	0	0	ATGCAGCATTGGGGAGCCCAGAGGAGAAG	0.130619	0
DNA	1	chr20	8888799	-	3	GCGGCATAGATGAGCCCAGCTGAG	GCGGCATAGATGAGCCCAGCTGAG	GCAGCATAG-TGAGCCCAGAANRG	GCAGCATAGTGAGCCCAGAANRG				0	0	0	0	41.05	0	0	0	TAGCGGCATAGATGAGCCCAGCTGAGATA	0.184458	0
RNA	1	chr1	177824708	+	3	GT-GCACAGTCAGCCCAGAAGGG	GTGCACAGTCAGCCCAGAAGGG	GCAGCATAGTGAGCCCAGAANRG	GCAGCATAGTGAGCCCAGAANRG				0	0	0	0	46.68	0	0	0	ACCGTGCACAGTCAGCCCAGAAGGGCAGG	0.130862	0
RNA	1	chr1	157797377	-	3	AC-ACATGGTGAGCCCAGAATAG	ACACATGGTGAGCCCAGAATAG	GCAGCATAGTGAGCCCAGAANRG	GCAGCATAGTGAGCCCAGAANRG				0	0	0	0	47.18	0	0	0	TCCTACACATGGTGAGCCCAGAATAGCTG	0.247057	0
RNA	1	chr1	151279848	+	3	CC-GCATAGGGAGACCAGAAGAG	CCGCATAGGGAGACCAGAAGAG	GCAGCATAGTGAGCCCAGAANRG	GCAGCATAGTGAGCCCAGAANRG				0	0	0	0	45.82	0	0	0	ATTCCGCATAGGGAGACCAGAAGAGGAGG	0.0942263	0
RNA	1	chr1	45854974	-	3	GA-GGATAGTGAGCCCAGAGCGG	GAGGATAGTGAGCCCAGAGCGG	GCAGCATAGTGAGCCCAGAANRG	GCAGCATAGTGAGCCCAGAANRG				0	0	0	0	41.42	0	0	0	CCTGGAGGATAGTGAGCCCAGAGCGGGTG	0.506053	0
RNA	1	chr1	228141706	+	3	GCAGCATGG-GAGCCCAGTCCAG	GCAGCATGGGAGCCCAGTCCAG	GCAGCATAGTGAGCCCAGAANRG	GCAGCATAGTGAGCCCAGAANRG				0	0	0	0	36.12	0	0	0	GGGGCAGCATGGGAGCCCAGTCCAGGGAG	0.154769	0
RNA	1	chr1	218852994	+	2	GCAGCAGAG-GATCCCAGAAAAG	GCAGCAGAGGATCCCAGAAAAG	GCAGCATAGTGAGCCCAGAANRG	GCAGCATAGTGAGCCCAGAANRG				0	0	0	0	46.06	0	0	0	GGAGCAGCAGAGGATCCCAGAAAAGATCT	0.165536	0
RNA	1	chr1	177355750	-	3	GCAGCATAC-GAGGCCAAAACAG	GCAGCATACGAGGCCAAAACAG	GCAGCATAGTGAGCCCAGAANRG	GCAGCATAGTGAGCCCAGAANRG				0	0	0	0	41.74	0	0	0	GGGGGCAGCATACGAGGCCAAAACAGATT	0.117248	0
RNA	1	chr1	146888046	-	3	GCAGCATAG-GAGAACACAAGAG	GCAGCATAGGAGAACACAAGAG	GCAGCATAGTGAGCCCAGAANRG	GCAGCATAGTGAGCCCAGAANRG				0	0	0	0	40.19	0	0	0	TGGGGCAGCATAGGAGAACACAAGAGGGG	0.0830835	0
RNA	1	chr1	112547892	+	3	GCAGCCTAG-GAGTTCAGAATAG	GCAGCCTAGGAGTTCAGAATAG	GCAGCATAGTGAGCCCAGAANRG	GCAGCATAGTGAGCCCAGAANRG				0	0	0	0	43.98	0	0	0	TTAGCAGCCTAGGAGTTCAGAATAGGGTG	0.15646	0
RNA	1	chr1	37622154	+	3	GCATCATGG-GAGCCCAGAGAAG	GCATCATGGGAGCCCAGAGAAG	GCAGCATAGTGAGCCCAGAANRG	GCAGCATAGTGAGCCCAGAANRG				0	0	0	0	40.95	0	0	0	ATAGCATCATGGGAGCCCAGAGAAGAGTA	0.149233	0
RNA	1	chr1	36666131	-	3	GCAGCAGAG-GAACCCAGAGGAG	GCAGCAGAGGAACCCAGAGGAG	GCAGCATAGTGAGCCCAGAANRG	GCAGCATAGTGAGCCCAGAANRG				0	0	0	0	40.06	0	0	0	ACAGGCAGCAGAGGAACCCAGAGGAGGAG	0.0777007	0
RNA	1	chr1	36534411	-	3	GCACCGTGG-GAGCCCAGAAGAG	GCACCGTGGGAGCCCAGAAGAG	GCAGCATAGTGAGCCCAGAANRG	GCAGCATAGTGAGCCCAGAANRG				0	0	0	0	46.74	0	0	0	CAGAGCACCGTGGGAGCCCAGAAGAGAGA	0.0663991	0
RNA	1	chr1	15007328	+	3	GCAGGATTG-GAACCCAGAACGG	GCAGGATTGGAACCCAGAACGG	GCAGCATAGTGAGCCCAGAANRG	GCAGCATAGTGAGCCCAGAANRG				0	0	0	0	45.83	0	0	0	GAGGCAGGATTGGAACCCAGAACGGGCAC	0.13667	0
RNA	1	chr1	10993305	-	3	ACAGCAAAG-GAGCCGAGAAAAG	ACAGCAAAGGAGCCGAGAAAAG	GCAGCATAGTGAGCCCAGAANRG	GCAGCATAGTGAGCCCAGAANRG				0	0	0	0	44.74	0	0	0	GGATACAGCAAAGGAGCCGAGAAAAGTCC	0.0676307	0
RNA	1	chr1	1237639	+	3	GCAGGACAG-GAGCCCAGGAGGG	GCAGGACAGGAGCCCAGGAGGG	GCAGCATAGTGAGCCCAGAANRG	GCAGCATAGTGAGCCCAGAANRG				0	0	0	0	41.97	0	0	0	CAGGCAGGACAGGAGCCCAGGAGGGCCGC	0.161837	0
DNA	1	chr1	218945781	+	3	GCAGCATTGGTGTGCCCATAATAG	GCAGCATTGGTGTGCCCATAATAG	GCAGCATAG-TGAGCCCAGAANRG	GCAGCATAGTGAGCCCAGAANRG				0	0	0	0	40.83	0	0	0	ATGGCAGCATTGGTGTGCCCATAATAGAT	0.115983	0
DNA	1	chr1	89610604	-	3	GCAGCATGGTTGGGCACAGAAGGG	GCAGCATGGTTGGGCACAGAAGGG	GCAGCATAG-TGAGCCCAGAANRG	GCAGCATAGTGAGCCCAGAANRG				0	0	0	0	43.53	0	0	0	GGGCAGCATGGTTGGGCACAGAAGGGCAC	0.186493	0
DNA	1	chr1	30878784	+	2	GCAGCCTGGGTGAGCCCAGAAGGG	GCAGCCTGGGTGAGCCCAGAAGGG	GCAGCATAG-TGAGCCCAGAANRG	GCAGCATAGTGAGCCCAGAANRG				0	0	0	0	46.72	0	0	0	CTGGCAGCCTGGGTGAGCCCAGAAGGGCG	0.194511	0
DNA	1	chr1	26202773	+	3	GCAGCAAGGATGAGCACAGAAGGG	GCAGCAAGGATGAGCACAGAAGGG	GCAGCATAG-TGAGCCCAGAANRG	GCAGCATAGTGAGCCCAGAANRG				0	0	0	0	44.4	0	0	0	CTAGCAGCAAGGATGAGCACAGAAGGGGG	0.140107	0
DNA	1	chr1	22652606	+	2	GCAGAAGAGATGAGCCCAGAAAGG	GCAGAAGAGATGAGCCCAGAAAGG	GCAGCATAG-TGAGCCCAGAANRG	GCAGCATAGTGAGCCCAGAANRG				0	0	0	0	46.78	0	0	0	GAAGCAGAAGAGATGAGCCCAGAAAGGGG	0.118024	0
DNA	1	chr1	4587418	+	3	GTACCTTAGCTGAGCCCAGAAGAG	GTACCTTAGCTGAGCCCAGAAGAG	GCAGCATAG-TGAGCCCAGAANRG	GCAGCATAGTGAGCCCAGAANRG				0	0	0	0	46.69	0	0	0	CCGGTACCTTAGCTGAGCCCAGAAGAGTA	0.116971	0
DNA	1	chr1	76710426	-	3	ACAGAATAGGTGAGCCCAGACCAG	ACAGAATAGGTGAGCCCAGACCAG	GCAGCATAG-TGAGCCCAGAANRG	GCAGCATAGTGAGCCCAGAANRG				0	0	0	0	46.89	0	0	0	AGACAGAATAGGTGAGCCCAGACCAGAGG	0.139512	0
RNA	1	chr1	89849958	-	3	C-AACATTGTGAGCCCAGAATAG	CAACATTGTGAGCCCAGAATAG	GCAGCATAGTGAGCCCAGAANRG	GCAGCATAGTGAGCCCAGAANRG				0	0	0	0	47.2	0	0	0	GAGACAACATTGTGAGCCCAGAATAGGGG	0.373305	0
RNA	1	chr1	57297749	-	3	G-AGAAAAGTGAGGCCAGAATGG	GAGAAAAGTGAGGCCAGAATGG	GCAGCATAGTGAGCCCAGAANRG	GCAGCATAGTGAGCCCAGAANRG				0	0	0	0	46.04	0	0	0	TTAGGAGAAAAGTGAGGCCAGAATGGACT	0.260123	0
RNA	1	chr1	54983598	-	3	G-AGGAGAGTGAGCCCAAAAAGG	GAGGAGAGTGAGCCCAAAAAGG	GCAGCATAGTGAGCCCAGAANRG	GCAGCATAGTGAGCCCAGAANRG				0	0	0	0	43.34	0	0	0	AAATGAGGAGAGTGAGCCCAAAAAGGTGA	0.0784629	0
RNA	1	chr1	54461513	+	3	G-AGCATACTGAGGCCAGGAAGG	GAGCATACTGAGGCCAGGAAGG	GCAGCATAGTGAGCCCAGAANRG	GCAGCATAGTGAGCCCAGAANRG				0	0	0	0	41.11	0	0	0	GAGGAGCATACTGAGGCCAGGAAGGCTTG	0.156839	0
RNA	1	chr1	45854974	-	2	G-AGGATAGTGAGCCCAGAGCGG	GAGGATAGTGAGCCCAGAGCGG	GCAGCATAGTGAGCCCAGAANRG	GCAGCATAGTGAGCCCAGAANRG				0	0	0	0	41.57	0	0	0	CCTGGAGGATAGTGAGCCCAGAGCGGGTG	0.506053	0
RNA	1	chr1	23799970	-	3	G-AGCTGCGTGAGCCCAGAAGGG	GAGCTGCGTGAGCCCAGAAGGG	GCAGCATAGTGAGCCCAGAANRG	GCAGCATAGTGAGCCCAGAANRG				0	0	0	0	47.05	0	0	0	GTTGGAGCTGCGTGAGCCCAGAAGGGGAT	0.338405	0
RNA	1	chr1	4202058	+	3	G-AGCTAAGTGAGCTCAGAAGAG	GAGCTAAGTGAGCTCAGAAGAG	GCAGCATAGTGAGCCCAGAANRG	GCAGCATAGTGAGCCCAGAANRG				0	0	0	0	45.42	0	0	0	GGGGAGCTAAGTGAGCTCAGAAGAGACAT	0.0767001	0
RNA	1	chr1	98964597	-	3	G-AGTTTAGTGAGCCCAGATGAG	GAGTTTAGTGAGCCCAGATGAG	GCAGCATAGTGAGCCCAGAANRG	GCAGCATAGTGAGCCCAGAANRG				0	0	0	0	41.36	0	0	0	GGTTGAGTTTAGTGAGCCCAGATGAGGGG	0.0408657	0
RNA	1	chr1	101809628	+	3	G-AGAATAATCAGCCCAGAATGG	GAGAATAATCAGCCCAGAATGG	GCAGCATAGTGAGCCCAGAANRG	GCAGCATAGTGAGCCCAGAANRG				0	0	0	0	46.52	0	0	0	TTTGAGAATAATCAGCCCAGAATGGAAAC	0.109359	0
RNA	1	chr1	104518161	+	3	C-AGAATAGAGAGCCCAGAAAGG	CAGAATAGAGAGCCCAGAAAGG	GCAGCATAGTGAGCCCAGAANRG	GCAGCATAGTGAGCCCAGAANRG				0	0	0	0	46.95	0	0	0	GAACAGAATAGAGAGCCCAGAAAGGAATC	0.19326	0
RNA	1	chr1	167882733	+	3	C-AGCATAGTGAGCTCAGACGGG	CAGCATAGTGAGCTCAGACGGG	GCAGCATAGTGAGCCCAGAANRG	GCAGCATAGTGAGCCCAGAANRG				0	0	0	0	39.74	0	0	0	GCCCAGCATAGTGAGCTCAGACGGGGATG	0.284705	0
RNA	1	chr1	202603545	+	3	G-AGCAGAGTGAGCCCACAGAGG	GAGCAGAGTGAGCCCACAGAGG	GCAGCATAGTGAGCCCAGAANRG	GCAGCATAGTGAGCCCAGAANRG				0	0	0	0	37.53	0	0	0	CAGGAGCAGAGTGAGCCCACAGAGGTGGA	0.182697	0
RNA	1	chr1	189356352	-	3	G-AGAAAAGTGAACCCAGAAGAG	GAGAAAAGTGAACCCAGAAGAG	GCAGCATAGTGAGCCCAGAANRG	GCAGCATAGTGAGCCCAGAANRG				0	0	0	0	46.24	0	0	0	GGTGGAGAAAAGTGAACCCAGAAGAGAGA	0.152022	0
RNA	1	chr1	177824708	+	3	G-TGCACAGTCAGCCCAGAAGGG	GTGCACAGTCAGCCCAGAAGGG	GCAGCATAGTGAGCCCAGAANRG	GCAGCATAGTGAGCCCAGAANRG				0	0	0	0	46.68	0	0	0	ACCGTGCACAGTCAGCCCAGAAGGGCAGG	0.130862	0
RNA	1	chr1	172466915	-	3	G-AGCAGAGTCAGCTCAGAAGGG	GAGCAGAGTCAGCTCAGAAGGG	GCAGCATAGTGAGCCCAGAANRG	GCAGCATAGTGAGCCCAGAANRG				0	0	0	0	44.93	0	0	0	ACAAGAGCAGAGTCAGCTCAGAAGGGCCA	0.0746083	0
RNA	1	chr1	45854974	-	3	GAGG-ATAGTGAGCCCAGAGCGG	GAGGATAGTGAGCCCAGAGCGG	GCAGCATAGTGAGCCCAGAANRG	GCAGCATAGTGAGCCCAGAANRG				0	0	0	0	41.42	0	0	0	CCTGGAGGATAGTGAGCCCAGAGCGGGTG	0.506053	0
RNA	1	chr1	39728040	+	3	GCAG-ATGGGGAACCCAGAAGAG	GCAGATGGGGAACCCAGAAGAG	GCAGCATAGTGAGCCCAGAANRG	GCAGCATAGTGAGCCCAGAANRG				0	0	0	0	45.83	0	0	0	TCAGCAGATGGGGAACCCAGAAGAGAGAT	0.136093	0
RNA	1	chr1	34043354	-	3	GCTG-AAAGTGAGCCCTGAAAAG	GCTGAAAGTGAGCCCTGAAAAG	GCAGCATAGTGAGCCCAGAANRG	GCAGCATAGTGAGCCCAGAANRG				0	0	0	0	44.32	0	0	0	TGATGCTGAAAGTGAGCCCTGAAAAGCTA	0.0499014	0
RNA	1	chr1	22098238	-	3	ACAG-ATAATGAGGCCAGAAAAG	ACAGATAATGAGGCCAGAAAAG	GCAGCATAGTGAGCCCAGAANRG	GCAGCATAGTGAGCCCAGAANRG				0	0	0	0	45.93	0	0	0	TTTTACAGATAATGAGGCCAGAAAAGTGG	0.0881917	0
RNA	1	chr1	18669509	-	3	GCAA-ATACTGAGCCCAGAGAGG	GCAAATACTGAGCCCAGAGAGG	GCAGCATAGTGAGCCCAGAANRG	GCAGCATAGTGAGCCCAGAANRG				0	0	0	0	41.18	0	0	0	AGATGCAAATACTGAGCCCAGAGAGGGAA	0.14119	0
RNA	1	chr1	5381284	+	3	CCAG-AAAGAGAGCCCAGAAGGG	CCAGAAAGAGAGCCCAGAAGGG	GCAGCATAGTGAGCCCAGAANRG	GCAGCATAGTGAGCCCAGAANRG				0	0	0	0	46.85	0	0	0	AAACCAGAAAGAGAGCCCAGAAGGGCTGG	0.133216	0
RNA	1	chr1	82270170	-	3	GAAG-ATATTGAGCACAGAAGGG	GAAGATATTGAGCACAGAAGGG	GCAGCATAGTGAGCCCAGAANRG	GCAGCATAGTGAGCCCAGAANRG				0	0	0	0	45.32	0	0	0	AATAGAAGATATTGAGCACAGAAGGGAGC	0.0846227	0
RNA	1	chr1	96539914	+	3	GCAG-ATAGTAAGCACAGAGAGG	GCAGATAGTAAGCACAGAGAGG	GCAGCATAGTGAGCCCAGAANRG	GCAGCATAGTGAGCCCAGAANRG				0	0	0	0	39.1	0	0	0	TTAGCAGATAGTAAGCACAGAGAGGTTCA	0.155994	0
RNA	1	chr1	147508281	-	3	GGAG-ATAGTGGGTCCAGAAAGG	GGAGATAGTGGGTCCAGAAAGG	GCAGCATAGTGAGCCCAGAANRG	GCAGCATAGTGAGCCCAGAANRG				0	0	0	0	45.47	0	0	0	TTGAGGAGATAGTGGGTCCAGAAAGGGGA	0.105391	0
RNA	1	chr1	100974039	+	3	GGAG-ATGGGGAGCCCAGAAGGG	GGAGATGGGGAGCCCAGAAGGG	GCAGCATAGTGAGCCCAGAANRG	GCAGCATAGTGAGCCCAGAANRG				0	0	0	0	46.8	0	0	0	AGCGGAGATGGGGAGCCCAGAAGGGGATG	0.146506	0
RNA	1	chr1	242368903	-	3	GCAG-ATAGTGAGGGCAAAAGAG	GCAGATAGTGAGGGCAAAAGAG	GCAGCATAGTGAGCCCAGAANRG	GCAGCATAGTGAGCCCAGAANRG				0	0	0	0	40.5	0	0	0	TTAGGCAGATAGTGAGGGCAAAAGAGTCC	0.0713921	0
RNA	1	chr1	238183888	-	3	GCAG-ATAGTGAGGGCAAAAGAG	GCAGATAGTGAGGGCAAAAGAG	GCAGCATAGTGAGCCCAGAANRG	GCAGCATAGTGAGCCCAGAANRG				0	0	0	0	40.5	0	0	0	GTAGGCAGATAGTGAGGGCAAAAGAGTCC	0.0717906	0
RNA	1	chr1	234309448	+	3	GCAG-AAAATGAGCCCAGCAGAG	GCAGAAAATGAGCCCAGCAGAG	GCAGCATAGTGAGCCCAGAANRG	GCAGCATAGTGAGCCCAGAANRG				0	0	0	0	42.12	0	0	0	GCAGCAGAAAATGAGCCCAGCAGAGGGCC	0.141965	0
RNA	1	chr1	215320250	+	3	ACAG-ATAGTGAGCCCAATAAGG	ACAGATAGTGAGCCCAATAAGG	GCAGCATAGTGAGCCCAGAANRG	GCAGCATAGTGAGCCCAGAANRG				0	0	0	0	38.58	0	0	0	CGTACAGATAGTGAGCCCAATAAGGTGGT	0.174335	0
RNA	1	chr1	211339586	-	3	GCAG-GTAGGGAGCCCAGAGAGG	GCAGGTAGGGAGCCCAGAGAGG	GCAGCATAGTGAGCCCAGAANRG	GCAGCATAGTGAGCCCAGAANRG				0	0	0	0	40.99	0	0	0	GAGAGCAGGTAGGGAGCCCAGAGAGGAGG	0.173407	0
RNA	1	chr1	207408411	-	3	TCAG-ACAGGGAGCCCAGAAGAG	TCAGACAGGGAGCCCAGAAGAG	GCAGCATAGTGAGCCCAGAANRG	GCAGCATAGTGAGCCCAGAANRG				0	0	0	0	46.85	0	0	0	TCTTTCAGACAGGGAGCCCAGAAGAGTAC	0.0670531	0
RNA	1	chr1	205919049	+	3	GAAG-ATAGTGAGACCAGAGCAG	GAAGATAGTGAGACCAGAGCAG	GCAGCATAGTGAGCCCAGAANRG	GCAGCATAGTGAGCCCAGAANRG				0	0	0	0	40.27	0	0	0	GGGGAAGATAGTGAGACCAGAGCAGGGAT	0.113625	0
RNA	1	chr1	202819197	+	3	GAAG-AGAGTGAGCCAAGAAAGG	GAAGAGAGTGAGCCAAGAAAGG	GCAGCATAGTGAGCCCAGAANRG	GCAGCATAGTGAGCCCAGAANRG				0	0	0	0	45.04	0	0	0	TGGGAAGAGAGTGAGCCAAGAAAGGAAAC	0.114996	0
RNA	1	chr1	198827477	+	3	GCAG-ATGGTGAAGCCAGAAGGG	GCAGATGGTGAAGCCAGAAGGG	GCAGCATAGTGAGCCCAGAANRG	GCAGCATAGTGAGCCCAGAANRG				0	0	0	0	45.03	0	0	0	TCAGCAGATGGTGAAGCCAGAAGGGAGAT	0.136468	0
RNA	1	chr1	178278077	+	3	GCAG-AGAGGGGGCCCAGAAGAG	GCAGAGAGGGGGCCCAGAAGAG	GCAGCATAGTGAGCCCAGAANRG	GCAGCATAGTGAGCCCAGAANRG				0	0	0	0	46.17	0	0	0	GCCGCAGAGAGGGGGCCCAGAAGAGGGTT	0.158039	0
RNA	1	chr1	164868327	+	2	GCAG-CTAGTGAGCCCAGAGGAG	GCAGCTAGTGAGCCCAGAGGAG	GCAGCATAGTGAGCCCAGAANRG	GCAGCATAGTGAGCCCAGAANRG				0	0	0	0	41.49	0	0	0	TAGGCAGCTAGTGAGCCCAGAGGAGCAGG	0.205557	0
RNA	1	chr1	161395192	-	3	GGAG-ATAGTGAGGGCAGAAGAG	GGAGATAGTGAGGGCAGAAGAG	GCAGCATAGTGAGCCCAGAANRG	GCAGCATAGTGAGCCCAGAANRG				0	0	0	0	44.37	0	0	0	TTTAGGAGATAGTGAGGGCAGAAGAGTCC	0.0756862	0
RNA	1	chr1	158926410	+	3	GCAG-ATAGTGAGGGCAAAAGAG	GCAGATAGTGAGGGCAAAAGAG	GCAGCATAGTGAGCCCAGAANRG	GCAGCATAGTGAGCCCAGAANRG				0	0	0	0	40.5	0	0	0	TAGGCAGATAGTGAGGGCAAAAGAGTCCT	0.137377	0
RNA	1	chr1	157797377	-	3	ACAC-ATGGTGAGCCCAGAATAG	ACACATGGTGAGCCCAGAATAG	GCAGCATAGTGAGCCCAGAANRG	GCAGCATAGTGAGCCCAGAANRG				0	0	0	0	47.14	0	0	0	TCCTACACATGGTGAGCCCAGAATAGCTG	0.247057	0
DNA	1	chr1	227940466	-	3	ACAGGAGAGTGAGCTCCAGAAGGG	ACAGGAGAGTGAGCTCCAGAAGGG	GCAGCATAGTGAGC-CCAGAANRG	GCAGCATAGTGAGCCCAGAANRG				0	0	0	0	45.26	0	0	0	CTACAGGAGAGTGAGCTCCAGAAGGGATG	0.226666	0
DNA	1	chr1	220929476	+	3	GTAGCATAGTGAGCAACAGAGTGG	GTAGCATAGTGAGCAACAGAGTGG	GCAGCATAGTGAGC-CCAGAANRG	GCAGCATAGTGAGCCCAGAANRG				0	0	0	0	43.37	0	0	0	AAGGTAGCATAGTGAGCAACAGAGTGGAC	0.154411	0
RNA	1	chr1	212468391	+	3	GTAGC-TAGTGAGCCCAAAGTGG	GTAGCTAGTGAGCCCAAAGTGG	GCAGCATAGTGAGCCCAGAANRG	GCAGCATAGTGAGCCCAGAANRG				0	0	0	0	37.55	0	0	0	CTGGTAGCTAGTGAGCCCAAAGTGGCTTT	0.139808	0
RNA	1	chr1	211339586	-	3	GCAGG-TAGGGAGCCCAGAGAGG	GCAGGTAGGGAGCCCAGAGAGG	GCAGCATAGTGAGCCCAGAANRG	GCAGCATAGTGAGCCCAGAANRG				0	0	0	0	40.99	0	0	0	GAGAGCAGGTAGGGAGCCCAGAGAGGAGG	0.173407	0
RNA	1	chr1	204424840	-	3	GCACC-TTGTGAGCCCAGCAGAG	GCACCTTGTGAGCCCAGCAGAG	GCAGCATAGTGAGCCCAGAANRG	GCAGCATAGTGAGCCCAGAANRG				0	0	0	0	42.24	0	0	0	CATGGCACCTTGTGAGCCCAGCAGAGCCA	0.0397217	0
RNA	1	chr1	179257149	+	3	GCAGC-TAAAGAGCCCAGGAAGG	GCAGCTAAAGAGCCCAGGAAGG	GCAGCATAGTGAGCCCAGAANRG	GCAGCATAGTGAGCCCAGAANRG				0	0	0	0	41.83	0	0	0	ATGGCAGCTAAAGAGCCCAGGAAGGGTAA	0.174359	0
RNA	1	chr1	169824744	-	3	GCAGC-TAGTAAGACTAGAAGAG	GCAGCTAGTAAGACTAGAAGAG	GCAGCATAGTGAGCCCAGAANRG	GCAGCATAGTGAGCCCAGAANRG				0	0	0	0	43.38	0	0	0	AGGAGCAGCTAGTAAGACTAGAAGAGAAC	0.0760187	0
RNA	1	chr1	164868327	+	1	GCAGC-TAGTGAGCCCAGAGGAG	GCAGCTAGTGAGCCCAGAGGAG	GCAGCATAGTGAGCCCAGAANRG	GCAGCATAGTGAGCCCAGAANRG				0	0	0	0	41.68	0	0	0	TAGGCAGCTAGTGAGCCCAGAGGAGCAGG	0.205557	0
RNA	1	chr1	55616384	+	3	GCAGC-AATTGAGGCCAGAAAAG	GCAGCAATTGAGGCCAGAAAAG	GCAGCATAGTGAGCCCAGAANRG	GCAGCATAGTGAGCCCAGAANRG				0	0	0	0	45.8	0	0	0	AAAGCAGCAATTGAGGCCAGAAAAGGTGA	0.162806	0
RNA	1	chr1	55030709	-	3	GCAGC-TGGGGAGCCCAGAGAGG	GCAGCTGGGGAGCCCAGAGAGG	GCAGCATAGTGAGCCCAGAANRG	GCAGCATAGTGAGCCCAGAANRG				0	0	0	0	40.91	0	0	0	AGGAGCAGCTGGGGAGCCCAGAGAGGAGT	0.137672	0
RNA	1	chr1	32772397	+	3	GCAGC-TGGTGGGCCCAGAGGAG	GCAGCTGGTGGGCCCAGAGGAG	GCAGCATAGTGAGCCCAGAANRG	GCAGCATAGTGAGCCCAGAANRG				0	0	0	0	40.61	0	0	0	CCTGCAGCTGGTGGGCCCAGAGGAGAAGA	0.153627	0
RNA	1	chr1	24126198	-	3	GCTGC-TAGGGAGCTCAGAATAG	GCTGCTAGGGAGCTCAGAATAG	GCAGCATAGTGAGCCCAGAANRG	GCAGCATAGTGAGCCCAGAANRG				0	0	0	0	45.13	0	0	0	AAAGGCTGCTAGGGAGCTCAGAATAGAAC	0.045309	0
RNA	1	chr1	7509032	-	3	GCAGC-CAGGGAGCCCAGGACAG	GCAGCCAGGGAGCCCAGGACAG	GCAGCATAGTGAGCCCAGAANRG	GCAGCATAGTGAGCCCAGAANRG				0	0	0	0	41.95	0	0	0	CACAGCAGCCAGGGAGCCCAGGACAGACC	0.0931156	0
RNA	1	chr1	185649748	+	3	GCAGC-TTGTAAGCCCAGCATAG	GCAGCTTGTAAGCCCAGCATAG	GCAGCATAGTGAGCCCAGAANRG	GCAGCATAGTGAGCCCAGAANRG				0	0	0	0	41.71	0	0	0	CCTGCAGCTTGTAAGCCCAGCATAGTTCA	0.112855	0
DNA	1	chr16	85353085	-	3	GCAGCCTAGTGAGGCCCAGAGCAG	GCAGCCTAGTGAGGCCCAGAGCAG	GCAGCATAGTGAGCC-CAGAANRG	GCAGCATAGTGAGCCCAGAANRG				0	0	0	0	43.89	0	0	0	CTGCAGCCTAGTGAGGCCCAGAGCAGAGG	0.347618	0
DNA	1	chr16	60814112	-	3	GCAGCATAGGGAGACTCAGATCAG	GCAGCATAGGGAGACTCAGATCAG	GCAGCATAGTGAGCC-CAGAANRG	GCAGCATAGTGAGCCCAGAANRG				0	0	0	0	43.6	0	0	0	GGGCAGCATAGGGAGACTCAGATCAGAAA	0.12917	0
DNA	1	chr16	9283801	-	3	GGAAGCATGGTGAGCCCAGCACAG	GGAAGCATGGTGAGCCCAGCACAG	GCA-GCATAGTGAGCCCAGAANRG	GCAGCATAGTGAGCCCAGAANRG				0	0	0	0	41.05	0	0	0	TAGGAAGCATGGTGAGCCCAGCACAGTGA	0.358308	0
DNA	1	chr16	67398452	+	3	GCCACCATAGTGAGCCCATACTAG	GCCACCATAGTGAGCCCATACTAG	G-CAGCATAGTGAGCCCAGAANRG	GCAGCATAGTGAGCCCAGAANRG				0	0	0	0	42.38	0	0	0	CTGGCCACCATAGTGAGCCCATACTAGGC	0.102178	0
DNA	1	chr16	9283801	-	3	GGAAGCATGGTGAGCCCAGCACAG	GGAAGCATGGTGAGCCCAGCACAG	G-CAGCATAGTGAGCCCAGAANRG	GCAGCATAGTGAGCCCAGAANRG				0	0	0	0	41.07	0	0	0	TAGGAAGCATGGTGAGCCCAGCACAGTGA	0.358308	0
DNA	1	chr1	159910957	+	3	GCAGCATGGGGAGGCCCAGCAGGG	GCAGCATGGGGAGGCCCAGCAGGG	GCAGCATAGTGAG-CCCAGAANRG	GCAGCATAGTGAGCCCAGAANRG				0	0	0	0	39.63	0	0	0	CAGGCAGCATGGGGAGGCCCAGCAGGGTA	0.150871	0
DNA	1	chr1	20383456	+	3	GCAGCAAACTGAGACCCAGAGAGG	GCAGCAAACTGAGACCCAGAGAGG	GCAGCATAGTGAG-CCCAGAANRG	GCAGCATAGTGAGCCCAGAANRG				0	0	0	0	45.82	0	0	0	AGAGCAGCAAACTGAGACCCAGAGAGGTT	0.115759	0
RNA	1	chr1	209647078	+	3	AAAGCAGA-TGAGCCCAGAAGGG	AAAGCAGATGAGCCCAGAAGGG	GCAGCATAGTGAGCCCAGAANRG	GCAGCATAGTGAGCCCAGAANRG				0	0	0	0	47.06	0	0	0	ATCAAAGCAGATGAGCCCAGAAGGGCAAA	0.143403	0
RNA	1	chr1	177355750	-	3	GCAGCATA-CGAGGCCAAAACAG	GCAGCATACGAGGCCAAAACAG	GCAGCATAGTGAGCCCAGAANRG	GCAGCATAGTGAGCCCAGAANRG				0	0	0	0	41.74	0	0	0	GGGGGCAGCATACGAGGCCAAAACAGATT	0.117248	0
RNA	1	chr1	173504206	+	3	GCTGCATA-TGACCCTAGAAGAG	GCTGCATATGACCCTAGAAGAG	GCAGCATAGTGAGCCCAGAANRG	GCAGCATAGTGAGCCCAGAANRG				0	0	0	0	43.99	0	0	0	AGTGCTGCATATGACCCTAGAAGAGGGTG	0.13927	0
RNA	1	chr1	153386547	-	3	GCAACATT-TGAGCCCACAAAGG	GCAACATTTGAGCCCACAAAGG	GCAGCATAGTGAGCCCAGAANRG	GCAGCATAGTGAGCCCAGAANRG				0	0	0	0	43.1	0	0	0	GCATGCAACATTTGAGCCCACAAAGGAGT	0.127023	0
RNA	1	chr1	145887095	-	3	GCAGCATA-TGACTCCTGAAGAG	GCAGCATATGACTCCTGAAGAG	GCAGCATAGTGAGCCCAGAANRG	GCAGCATAGTGAGCCCAGAANRG				0	0	0	0	42.14	0	0	0	GGCGGCAGCATATGACTCCTGAAGAGCCT	0.0637587	0
RNA	1	chr1	99642184	-	3	GCACAATT-TGAGCCCAGAAAAG	GCACAATTTGAGCCCAGAAAAG	GCAGCATAGTGAGCCCAGAANRG	GCAGCATAGTGAGCCCAGAANRG				0	0	0	0	46.91	0	0	0	TATTGCACAATTTGAGCCCAGAAAAGTAT	0.0989509	0
RNA	1	chr1	83088112	-	3	GCAGCACT-TTAGCCCAGAACAG	GCAGCACTTTAGCCCAGAACAG	GCAGCATAGTGAGCCCAGAANRG	GCAGCATAGTGAGCCCAGAANRG				0	0	0	0	46.34	0	0	0	TGAGGCAGCACTTTAGCCCAGAACAGTTA	0.0893708	0
RNA	1	chr1	55616384	+	3	GCAGCAAT-TGAGGCCAGAAAAG	GCAGCAATTGAGGCCAGAAAAG	GCAGCATAGTGAGCCCAGAANRG	GCAGCATAGTGAGCCCAGAANRG				0	0	0	0	45.74	0	0	0	AAAGCAGCAATTGAGGCCAGAAAAGGTGA	0.162806	0
RNA	1	chr1	44346625	+	3	ACAGCATC-TGATCCCAGAAGAG	ACAGCATCTGATCCCAGAAGAG	GCAGCATAGTGAGCCCAGAANRG	GCAGCATAGTGAGCCCAGAANRG				0	0	0	0	46.05	0	0	0	TAGACAGCATCTGATCCCAGAAGAGAGGT	0.150422	0
RNA	1	chr1	37952471	-	3	GCAGCAAA-TGAGACCAGATCAG	GCAGCAAATGAGACCAGATCAG	GCAGCATAGTGAGCCCAGAANRG	GCAGCATAGTGAGCCCAGAANRG				0	0	0	0	40.01	0	0	0	GTTGGCAGCAAATGAGACCAGATCAGAGT	0.0690134	0
RNA	1	chr1	33061115	-	3	GCAGCATC-TGAGCCCTGAGTGG	GCAGCATCTGAGCCCTGAGTGG	GCAGCATAGTGAGCCCAGAANRG	GCAGCATAGTGAGCCCAGAANRG				0	0	0	0	38.27	0	0	0	CATGGCAGCATCTGAGCCCTGAGTGGATT	0.123408	0
RNA	1	chr1	26322855	-	3	GCAGGAGA-TGAGGCCAGAAAGG	GCAGGAGATGAGGCCAGAAAGG	GCAGCATAGTGAGCCCAGAANRG	GCAGCATAGTGAGCCCAGAANRG				0	0	0	0	45.82	0	0	0	GGTAGCAGGAGATGAGGCCAGAAAGGTTA	0.110326	0
RNA	1	chr1	3332950	-	3	GCAGAATA-TTAGCCAAGAAAAG	GCAGAATATTAGCCAAGAAAAG	GCAGCATAGTGAGCCCAGAANRG	GCAGCATAGTGAGCCCAGAANRG				0	0	0	0	44.35	0	0	0	TGCAGCAGAATATTAGCCAAGAAAAGGAG	0.046927	0
RNA	1	chr1	218852994	+	3	GCAGCAGA-GGATCCCAGAAAAG	GCAGCAGAGGATCCCAGAAAAG	GCAGCATAGTGAGCCCAGAANRG	GCAGCATAGTGAGCCCAGAANRG				0	0	0	0	45.71	0	0	0	GGAGCAGCAGAGGATCCCAGAAAAGATCT	0.165536	0
RNA	1	chr1	234309448	+	3	GCAGAAAA-TGAGCCCAGCAGAG	GCAGAAAATGAGCCCAGCAGAG	GCAGCATAGTGAGCCCAGAANRG	GCAGCATAGTGAGCCCAGAANRG				0	0	0	0	42.12	0	0	0	GCAGCAGAAAATGAGCCCAGCAGAGGGCC	0.141965	0
RNA	1	chr1	75292605	+	3	GCAGCAAAGTGA-CCCATATCAG	GCAGCAAAGTGACCCATATCAG	GCAGCATAGTGAGCCCAGAANRG	GCAGCATAGTGAGCCCAGAANRG				0	0	0	0	36.56	0	0	0	ACTGCAGCAAAGTGACCCATATCAGTCTC	0.116407	0
RNA	1	chr1	54132905	-	3	GCAGCTTAGGGA-CCCATAACAG	GCAGCTTAGGGACCCATAACAG	GCAGCATAGTGAGCCCAGAANRG	GCAGCATAGTGAGCCCAGAANRG				0	0	0	0	42.08	0	0	0	GGAGGCAGCTTAGGGACCCATAACAGGGG	0.0478898	0
RNA	1	chr1	27645148	-	3	GGAGCACAGTGA-CCCAGCACAG	GGAGCACAGTGACCCAGCACAG	GCAGCATAGTGAGCCCAGAANRG	GCAGCATAGTGAGCCCAGAANRG				0	0	0	0	41.43	0	0	0	CCAAGGAGCACAGTGACCCAGCACAGGCT	0.0614885	0
RNA	1	chr1	20415417	+	3	GCAGCAGAGTGA-CCAAGGAGAG	GCAGCAGAGTGACCAAGGAGAG	GCAGCATAGTGAGCCCAGAANRG	GCAGCATAGTGAGCCCAGAANRG				0	0	0	0	39.26	0	0	0	GCTGCAGCAGAGTGACCAAGGAGAGATGG	0.109072	0
RNA	1	chr1	11237149	+	3	GCAACATAGAGA-CCCACAAGAG	GCAACATAGAGACCCACAAGAG	GCAGCATAGTGAGCCCAGAANRG	GCAGCATAGTGAGCCCAGAANRG				0	0	0	0	42.12	0	0	0	TGAGCAACATAGAGACCCACAAGAGGCAG	0.152744	0
RNA	1	chr1	112034845	+	3	GCAGAATAGTAA-ACCAGAAAGG	GCAGAATAGTAAACCAGAAAGG	GCAGCATAGTGAGCCCAGAANRG	GCAGCATAGTGAGCCCAGAANRG				0	0	0	0	44.6	0	0	0	GTAGCAGAATAGTAAACCAGAAAGGGACC	0.164619	0
RNA	1	chr1	201042547	+	3	GCACCATGGTGA-CCCAAAAAGG	GCACCATGGTGACCCAAAAAGG	GCAGCATAGTGAGCCCAGAANRG	GCAGCATAGTGAGCCCAGAANRG				0	0	0	0	42.35	0	0	0	CTTGCACCATGGTGACCCAAAAAGGTACA	0.0728662	0
RNA	1	chr1	212859046	-	3	CCAACATGGTGA-CCCAGAAGAG	CCAACATGGTGACCCAGAAGAG	GCAGCATAGTGAGCCCAGAANRG	GCAGCATAGTGAGCCCAGAANRG				0	0	0	0	46.23	0	0	0	TGGCCCAACATGGTGACCCAGAAGAGATG	0.0728341	0
RNA	1	chr1	230823773	+	3	GCAGCATAGAGA-CCCACAGAGG	GCAGCATAGAGACCCACAGAGG	GCAGCATAGTGAGCCCAGAANRG	GCAGCATAGTGAGCCCAGAANRG				0	0	0	0	36.29	0	0	0	TCTGCAGCATAGAGACCCACAGAGGGGAC	0.175279	0
RNA	1	chr1	240147793	-	3	GCAGCACAGTAA-CACAGAATAG	GCAGCACAGTAACACAGAATAG	GCAGCATAGTGAGCCCAGAANRG	GCAGCATAGTGAGCCCAGAANRG				0	0	0	0	43.96	0	0	0	CCAGGCAGCACAGTAACACAGAATAGCAT	0.0990553	0
DNA	1	chr16	57574978	-	3	GCAGCACGGTGAGGCCCAGCACAG	GCAGCACGGTGAGGCCCAGCACAG	GCAGCATAGTGA-GCCCAGAANRG	GCAGCATAGTGAGCCCAGAANRG				0	0	0	0	40.1	0	0	0	CAGCAGCACGGTGAGGCCCAGCACAGTGA	0.17616	0
DNA	1	chr16	85353085	-	2	GCAGCCTAGTGAGGCCCAGAGCAG	GCAGCCTAGTGAGGCCCAGAGCAG	GCAGCATAGTGA-GCCCAGAANRG	GCAGCATAGTGAGCCCAGAANRG				0	0	0	0	46.39	0	0	0	CTGCAGCCTAGTGAGGCCCAGAGCAGAGG	0.347618	0
RNA	1	chr1	240147793	-	3	GCAGCACAGT-AACACAGAATAG	GCAGCACAGTAACACAGAATAG	GCAGCATAGTGAGCCCAGAANRG	GCAGCATAGTGAGCCCAGAANRG				0	0	0	0	43.96	0	0	0	CCAGGCAGCACAGTAACACAGAATAGCAT	0.0990553	0
RNA	1	chr1	218852994	+	3	GCAGCAGAGG-ATCCCAGAAAAG	GCAGCAGAGGATCCCAGAAAAG	GCAGCATAGTGAGCCCAGAANRG	GCAGCATAGTGAGCCCAGAANRG				0	0	0	0	45.36	0	0	0	GGAGCAGCAGAGGATCCCAGAAAAGATCT	0.165536	0
RNA	1	chr1	211703768	-	3	GTAACATAGT-AGCACAGAATGG	GTAACATAGTAGCACAGAATGG	GCAGCATAGTGAGCCCAGAANRG	GCAGCATAGTGAGCCCAGAANRG				0	0	0	0	44.99	0	0	0	TGCAGTAACATAGTAGCACAGAATGGAAT	0.0995964	0
RNA	1	chr1	112034845	+	3	GCAGAATAGT-AAACCAGAAAGG	GCAGAATAGTAAACCAGAAAGG	GCAGCATAGTGAGCCCAGAANRG	GCAGCATAGTGAGCCCAGAANRG				0	0	0	0	44.6	0	0	0	GTAGCAGAATAGTAAACCAGAAAGGGACC	0.164619	0
RNA	1	chr1	94233429	-	3	GTAGTATAGT-AGCTCAGAAAAG	GTAGTATAGTAGCTCAGAAAAG	GCAGCATAGTGAGCCCAGAANRG	GCAGCATAGTGAGCCCAGAANRG				0	0	0	0	44.97	0	0	0	GAAAGTAGTATAGTAGCTCAGAAAAGAAA	0.0810909	0
RNA	1	chr1	83088112	-	3	GCAGCACTTT-AGCCCAGAACAG	GCAGCACTTTAGCCCAGAACAG	GCAGCATAGTGAGCCCAGAANRG	GCAGCATAGTGAGCCCAGAANRG				0	0	0	0	46.34	0	0	0	TGAGGCAGCACTTTAGCCCAGAACAGTTA	0.0893708	0
RNA	1	chr1	48293392	-	3	GCAGCATAGT-AGAGCAAAAAAG	GCAGCATAGTAGAGCAAAAAAG	GCAGCATAGTGAGCCCAGAANRG	GCAGCATAGTGAGCCCAGAANRG				0	0	0	0	39.99	0	0	0	TGCGGCAGCATAGTAGAGCAAAAAAGCAA	0.0797264	0
RNA	1	chr1	3332950	-	3	GCAGAATATT-AGCCAAGAAAAG	GCAGAATATTAGCCAAGAAAAG	GCAGCATAGTGAGCCCAGAANRG	GCAGCATAGTGAGCCCAGAANRG				0	0	0	0	44.35	0	0	0	TGCAGCAGAATATTAGCCAAGAAAAGGAG	0.046927	0
RNA	1	chr1	240938555	-	3	GCATCATAGT-ACCCCAAAACAG	GCATCATAGTACCCCAAAACAG	GCAGCATAGTGAGCCCAGAANRG	GCAGCATAGTGAGCCCAGAANRG				0	0	0	0	41.92	0	0	0	AGGGGCATCATAGTACCCCAAAACAGATA	0.0729935	0
DNA	1	chr1	187690859	-	3	CTAGAATAGTGAGCCCAGAAATAG	CTAGAATAGTGAGCCCAGAAATAG	GCAGCATAGTGAGCCCAGA-ANRG	GCAGCATAGTGAGCCCAGAANRG				0	0	0	0	41.26	0	0	0	ATCTAGAATAGTGAGCCCAGAAATAGACC	0.136841	0
DNA	1	chr1	187147031	-	3	ACAGAATAGAGAGCCCAGAAATAG	ACAGAATAGAGAGCCCAGAAATAG	GCAGCATAGTGAGCCCAGA-ANRG	GCAGCATAGTGAGCCCAGAANRG				0	0	0	0	40.89	0	0	0	TAACAGAATAGAGAGCCCAGAAATAGACT	0.118987	0
DNA	1	chr1	187247590	+	3	GCAGAATAGAGAGCCTAGAAATGG	GCAGAATAGAGAGCCTAGAAATGG	GCAGCATAGTGAGCCCAGA-ANRG	GCAGCATAGTGAGCCCAGAANRG				0	0	0	0	38.71	0	0	0	GAAGCAGAATAGAGAGCCTAGAAATGGAT	0.42163	0
DNA	1	chr1	175043347	-	3	GCAGAATAGAGAACCCAGAAACAG	GCAGAATAGAGAACCCAGAAACAG	GCAGCATAGTGAGCCCAGA-ANRG	GCAGCATAGTGAGCCCAGAANRG				0	0	0	0	39.91	0	0	0	GAGCAGAATAGAGAACCCAGAAACAGATT	0.124499	0
DNA	1	chr1	167882732	+	3	CCAGCATAGTGAGCTCAGACGGGG	CCAGCATAGTGAGCTCAGACGGGG	GCAGCATAGTGAGCCCAGA-ANRG	GCAGCATAGTGAGCCCAGAANRG				0	0	0	0	39.68	0	0	0	AGCCCAGCATAGTGAGCTCAGACGGGGAT	0.524341	0
DNA	1	chr1	117686631	+	3	GCAGCACAGTGAAACCAGACACAG	GCAGCACAGTGAAACCAGACACAG	GCAGCATAGTGAGCCCAGA-ANRG	GCAGCATAGTGAGCCCAGAANRG				0	0	0	0	39.07	0	0	0	CAGGCAGCACAGTGAAACCAGACACAGCA	0.272204	0
DNA	1	chr1	97708470	-	3	ACAGAATAGAGAGCCCAGAAATAG	ACAGAATAGAGAGCCCAGAAATAG	GCAGCATAGTGAGCCCAGA-ANRG	GCAGCATAGTGAGCCCAGAANRG				0	0	0	0	40.89	0	0	0	GAACAGAATAGAGAGCCCAGAAATAGACA	0.117766	0
DNA	1	chr1	93725910	-	3	ACAGAATAGAGAGCCCAGAAATAG	ACAGAATAGAGAGCCCAGAAATAG	GCAGCATAGTGAGCCCAGA-ANRG	GCAGCATAGTGAGCCCAGAANRG				0	0	0	0	40.89	0	0	0	GAACAGAATAGAGAGCCCAGAAATAGACC	0.117788	0
DNA	1	chr1	90803812	-	3	ACAGAATAGAGAGCCCAGAAATAG	ACAGAATAGAGAGCCCAGAAATAG	GCAGCATAGTGAGCCCAGA-ANRG	GCAGCATAGTGAGCCCAGAANRG				0	0	0	0	40.89	0	0	0	GAACAGAATAGAGAGCCCAGAAATAGACC	0.117788	0
DNA	1	chr1	89756101	-	3	TCAGCTTAGTGATCCCAGACAAGG	TCAGCTTAGTGATCCCAGACAAGG	GCAGCATAGTGAGCCCAGA-ANRG	GCAGCATAGTGAGCCCAGAANRG				0	0	0	0	40.27	0	0	0	ACTCAGCTTAGTGATCCCAGACAAGGTTC	0.162027	0
DNA	1	chr1	85423093	-	3	ACAGAATAGAGAGCCCAGAAATAG	ACAGAATAGAGAGCCCAGAAATAG	GCAGCATAGTGAGCCCAGA-ANRG	GCAGCATAGTGAGCCCAGAANRG				0	0	0	0	40.89	0	0	0	AAACAGAATAGAGAGCCCAGAAATAGACC	0.116496	0
DNA	1	chr1	72819598	+	2	GCAGAATAGAGAGCCCAGAAATAG	GCAGAATAGAGAGCCCAGAAATAG	GCAGCATAGTGAGCCCAGA-ANRG	GCAGCATAGTGAGCCCAGAANRG				0	0	0	0	41.01	0	0	0	GTGGCAGAATAGAGAGCCCAGAAATAGGG	0.680575	0
DNA	1	chr1	63559846	-	3	ACAGAATAGAGAGCCCAGAAATAG	ACAGAATAGAGAGCCCAGAAATAG	GCAGCATAGTGAGCCCAGA-ANRG	GCAGCATAGTGAGCCCAGAANRG				0	0	0	0	40.89	0	0	0	GAACAGAATAGAGAGCCCAGAAATAGACC	0.117788	0
DNA	1	chr1	45854973	-	3	GGAGGATAGTGAGCCCAGAGCGGG	GGAGGATAGTGAGCCCAGAGCGGG	GCAGCATAGTGAGCCCAGA-ANRG	GCAGCATAGTGAGCCCAGAANRG				0	0	0	0	41.38	0	0	0	CTGGAGGATAGTGAGCCCAGAGCGGGTGA	0.219648	0
DNA	1	chr1	29615504	-	3	CCAGAATAGAGAGCCCAGAAATAG	CCAGAATAGAGAGCCCAGAAATAG	GCAGCATAGTGAGCCCAGA-ANRG	GCAGCATAGTGAGCCCAGAANRG				0	0	0	0	40.89	0	0	0	GACCAGAATAGAGAGCCCAGAAATAGACC	0.10528	0
DNA	1	chr1	188870572	-	3	ACAGAATAGAGAGCCCAGAGACAG	ACAGAATAGAGAGCCCAGAGACAG	GCAGCATAGTGAGCCCAGA-ANRG	GCAGCATAGTGAGCCCAGAANRG				0	0	0	0	40.89	0	0	0	GAACAGAATAGAGAGCCCAGAGACAGACA	0.138553	0
DNA	1	chr1	193025960	+	3	ACAGACTAGTGAGCCCAGAAATAG	ACAGACTAGTGAGCCCAGAAATAG	GCAGCATAGTGAGCCCAGA-ANRG	GCAGCATAGTGAGCCCAGAANRG				0	0	0	0	41.18	0	0	0	TGGACAGACTAGTGAGCCCAGAAATAGAC	0.535594	0
DNA	1	chr1	224202398	-	3	GCAACATAGTGAGCCCGGACCCAG	GCAACATAGTGAGCCCGGACCCAG	GCAGCATAGTGAGCCCAGA-ANRG	GCAGCATAGTGAGCCCAGAANRG				0	0	0	0	38.53	0	0	0	GGGCAACATAGTGAGCCCGGACCCAGTCT	0.175658	0
DNA	1	chr1	228189061	-	3	ACAGAATAGAGAGCCCAGAAAAAG	ACAGAATAGAGAGCCCAGAAAAAG	GCAGCATAGTGAGCCCAGA-ANRG	GCAGCATAGTGAGCCCAGAANRG				0	0	0	0	40.89	0	0	0	GAACAGAATAGAGAGCCCAGAAAAAGCCC	0.130538	0
DNA	1	chr1	233805032	+	3	GCCCGATAGTGAGCCCAGAAATAG	GCCCGATAGTGAGCCCAGAAATAG	GCAGCATAGTGAGCCCAGA-ANRG	GCAGCATAGTGAGCCCAGAANRG				0	0	0	0	41.19	0	0	0	GGAGCCCGATAGTGAGCCCAGAAATAGGC	0.594188	0
DNA	1	chr1	218945781	+	3	GCAGCATTGGTGTGCCCATAATAG	GCAGCATTGGTGTGCCCATAATAG	GCAGCA-TAGTGAGCCCAGAANRG	GCAGCATAGTGAGCCCAGAANRG				0	0	0	0	41.02	0	0	0	ATGGCAGCATTGGTGTGCCCATAATAGAT	0.115983	0
DNA	1	chr1	218685472	-	3	ACAGCAATAGTGAGCAAAGAAGGG	ACAGCAATAGTGAGCAAAGAAGGG	GCAGCA-TAGTGAGCCCAGAANRG	GCAGCATAGTGAGCCCAGAANRG				0	0	0	0	42.05	0	0	0	CAACAGCAATAGTGAGCAAAGAAGGGTGA	0.194958	0
DNA	1	chr1	45879122	+	3	GATGCAATAGAGAGCCCAGAAAGG	GATGCAATAGAGAGCCCAGAAAGG	GCAGCA-TAGTGAGCCCAGAANRG	GCAGCATAGTGAGCCCAGAANRG				0	0	0	0	46.49	0	0	0	TAGGATGCAATAGAGAGCCCAGAAAGGTT	0.0823904	0
DNA	1	chr1	35724056	+	3	GCAAAAGTAGTAAGCCCAGAAAAG	GCAAAAGTAGTAAGCCCAGAAAAG	GCAGCA-TAGTGAGCCCAGAANRG	GCAGCATAGTGAGCCCAGAANRG				0	0	0	0	46.31	0	0	0	GAGGCAAAAGTAGTAAGCCCAGAAAAGGG	0.123751	0
DNA	1	chr1	30878784	+	3	GCAGCCTGGGTGAGCCCAGAAGGG	GCAGCCTGGGTGAGCCCAGAAGGG	GCAGCA-TAGTGAGCCCAGAANRG	GCAGCATAGTGAGCCCAGAANRG				0	0	0	0	46.64	0	0	0	CTGGCAGCCTGGGTGAGCCCAGAAGGGCG	0.194511	0
DNA	1	chr1	89849958	-	3	GACAACATTGTGAGCCCAGAATAG	GACAACATTGTGAGCCCAGAATAG	GC-AGCATAGTGAGCCCAGAANRG	GCAGCATAGTGAGCCCAGAANRG				0	0	0	0	46.88	0	0	0	GAGACAACATTGTGAGCCCAGAATAGGGG	0.373305	0
DNA	1	chr1	7791020	-	3	GCTTGCACTGTGAGCCCAGAAAAG	GCTTGCACTGTGAGCCCAGAAAAG	GC-AGCATAGTGAGCCCAGAANRG	GCAGCATAGTGAGCCCAGAANRG				0	0	0	0	46.76	0	0	0	AAGCTTGCACTGTGAGCCCAGAAAAGCCA	0.1705	0
DNA	1	chr1	167882731	+	3	CCCAGCATAGTGAGCTCAGACGGG	CCCAGCATAGTGAGCTCAGACGGG	GC-AGCATAGTGAGCCCAGAANRG	GCAGCATAGTGAGCCCAGAANRG				0	0	0	0	45.13	0	0	0	TAGCCCAGCATAGTGAGCTCAGACGGGGA	0.22991	0
DNA	1	chr1	22547106	-	3	GCAGCCAGAGAGAGGCCAGAAGAG	GCAGCCAGAGAGAGGCCAGAAGAG	GCAG-CATAGTGAGCCCAGAANRG	GCAGCATAGTGAGCCCAGAANRG				0	0	0	0	44.64	0	0	0	AGGCAGCCAGAGAGAGGCCAGAAGAGACT	0.118419	0
DNA	1	chr1	30878784	+	3	GCAGCCTGGGTGAGCCCAGAAGGG	GCAGCCTGGGTGAGCCCAGAAGGG	GCAG-CATAGTGAGCCCAGAANRG	GCAGCATAGTGAGCCCAGAANRG				0	0	0	0	46.66	0	0	0	CTGGCAGCCTGGGTGAGCCCAGAAGGGCG	0.194511	0
DNA	1	chr1	61208337	+	3	CCAGGCAGAGTGAGCTCAGAAGAG	CCAGGCAGAGTGAGCTCAGAAGAG	GCAG-CATAGTGAGCCCAGAANRG	GCAGCATAGTGAGCCCAGAANRG				0	0	0	0	44.82	0	0	0	ATGCCAGGCAGAGTGAGCTCAGAAGAGGA	0.124997	0
RNA	1	chr1	220360836	+	3	GCAGCATACAG-GCCCAGCAGGG	GCAGCATACAGGCCCAGCAGGG	GCAGCATAGTGAGCCCAGAANRG	GCAGCATAGTGAGCCCAGAANRG				0	0	0	0	41.24	0	0	0	GTTGCAGCATACAGGCCCAGCAGGGGTGG	0.136846	0
RNA	1	chr1	60270053	-	3	GTAGAATAGAG-GCCCAGAAAAG	GTAGAATAGAGGCCCAGAAAAG	GCAGCATAGTGAGCCCAGAANRG	GCAGCATAGTGAGCCCAGAANRG				0	0	0	0	46.27	0	0	0	CGAAGTAGAATAGAGGCCCAGAAAAGAGA	0.060494	0
RNA	1	chr1	36760290	+	3	GCAGCACAGTG-GCTCAGAGGAG	GCAGCACAGTGGCTCAGAGGAG	GCAGCATAGTGAGCCCAGAANRG	GCAGCATAGTGAGCCCAGAANRG				0	0	0	0	38.96	0	0	0	AGGGCAGCACAGTGGCTCAGAGGAGAAAC	0.150529	0
RNA	1	chr1	86472244	-	3	GCAGCATGGTGAGCCC-TAGTAG	GCAGCATGGTGAGCCCTAGTAG	GCAGCATAGTGAGCCCAGAANRG	GCAGCATAGTGAGCCCAGAANRG				0	0	0	0	34.62	0	0	0	CTTGGCAGCATGGTGAGCCCTAGTAGTGG	0.0980575	0
RNA	1	chr1	158447557	+	3	GCAGCATAGTGAGGCT-GGATGG	GCAGCATAGTGAGGCTGGATGG	GCAGCATAGTGAGCCCAGAANRG	GCAGCATAGTGAGCCCAGAANRG				0	0	0	0	36.29	0	0	0	ATGGCAGCATAGTGAGGCTGGATGGACTG	0.2679	0
RNA	1	chr1	201648979	+	3	GCAGCTTTATGAGCCC-GAATGG	GCAGCTTTATGAGCCCGAATGG	GCAGCATAGTGAGCCCAGAANRG	GCAGCATAGTGAGCCCAGAANRG				0	0	0	0	44.06	0	0	0	GCTGCAGCTTTATGAGCCCGAATGGAGCG	0.131622	0
DNA	1	chr1	218685472	-	3	ACAGCAATAGTGAGCAAAGAAGGG	ACAGCAATAGTGAGCAAAGAAGGG	GCAGC-ATAGTGAGCCCAGAANRG	GCAGCATAGTGAGCCCAGAANRG				0	0	0	0	42.07	0	0	0	CAACAGCAATAGTGAGCAAAGAAGGGTGA	0.194958	0
DNA	1	chr1	45879122	+	3	GATGCAATAGAGAGCCCAGAAAGG	GATGCAATAGAGAGCCCAGAAAGG	GCAGC-ATAGTGAGCCCAGAANRG	GCAGCATAGTGAGCCCAGAANRG				0	0	0	0	46.51	0	0	0	TAGGATGCAATAGAGAGCCCAGAAAGGTT	0.0823904	0
DNA	1	chr1	30878784	+	3	GCAGCCTGGGTGAGCCCAGAAGGG	GCAGCCTGGGTGAGCCCAGAAGGG	GCAGC-ATAGTGAGCCCAGAANRG	GCAGCATAGTGAGCCCAGAANRG				0	0	0	0	46.64	0	0	0	CTGGCAGCCTGGGTGAGCCCAGAAGGGCG	0.194511	0
DNA	1	chr1	22547106	-	3	GCAGCCAGAGAGAGGCCAGAAGAG	GCAGCCAGAGAGAGGCCAGAAGAG	GCAGC-ATAGTGAGCCCAGAANRG	GCAGCATAGTGAGCCCAGAANRG				0	0	0	0	44.62	0	0	0	AGGCAGCCAGAGAGAGGCCAGAAGAGACT	0.118419	0
RNA	1	chr1	17409494	-	3	GCAGGATTGTGAG-CCAGAGAGG	GCAGGATTGTGAGCCAGAGAGG	GCAGCATAGTGAGCCCAGAANRG	GCAGCATAGTGAGCCCAGAANRG				0	0	0	0	40.13	0	0	0	CCAGGCAGGATTGTGAGCCAGAGAGGGGG	0.0963624	0
RNA	1	chr1	17409494	-	3	GCAGGATTGTGAGC-CAGAGAGG	GCAGGATTGTGAGCCAGAGAGG	GCAGCATAGTGAGCCCAGAANRG	GCAGCATAGTGAGCCCAGAANRG				0	0	0	0	39.53	0	0	0	CCAGGCAGGATTGTGAGCCAGAGAGGGGG	0.0963624	0
RNA	1	chr1	110848481	-	3	GCAAAAGAGTGAGCC-AGAAGAG	GCAAAAGAGTGAGCCAGAAGAG	GCAGCATAGTGAGCCCAGAANRG	GCAGCATAGTGAGCCCAGAANRG				0	0	0	0	45	0	0	0	TTCAGCAAAAGAGTGAGCCAGAAGAGCCA	0.0804861	0
RNA	1	chr1	110848481	-	3	GCAAAAGAGTGAGC-CAGAAGAG	GCAAAAGAGTGAGCCAGAAGAG	GCAGCATAGTGAGCCCAGAANRG	GCAGCATAGTGAGCCCAGAANRG				0	0	0	0	45.4	0	0	0	TTCAGCAAAAGAGTGAGCCAGAAGAGCCA	0.0804861	0
RNA	1	chr1	110848481	-	3	GCAAAAGAGTGAG-CCAGAAGAG	GCAAAAGAGTGAGCCAGAAGAG	GCAGCATAGTGAGCCCAGAANRG	GCAGCATAGTGAGCCCAGAANRG				0	0	0	0	46	0	0	0	TTCAGCAAAAGAGTGAGCCAGAAGAGCCA	0.0804861	0
RNA	1	chr1	44375244	+	3	GGAGCAGAGTGAGCA-AGAAGGG	GGAGCAGAGTGAGCAAGAAGGG	GCAGCATAGTGAGCCCAGAANRG	GCAGCATAGTGAGCCCAGAANRG				0	0	0	0	43.33	0	0	0	GCTGGAGCAGAGTGAGCAAGAAGGGAAAT	0.125052	0
RNA	1	chr1	44375244	+	3	GGAGCAGAGTGAGC-AAGAAGGG	GGAGCAGAGTGAGCAAGAAGGG	GCAGCATAGTGAGCCCAGAANRG	GCAGCATAGTGAGCCCAGAANRG				0	0	0	0	43.33	0	0	0	GCTGGAGCAGAGTGAGCAAGAAGGGAAAT	0.125052	0
RNA	1	chr1	44375244	+	3	GGAGCAGAGTGAG-CAAGAAGGG	GGAGCAGAGTGAGCAAGAAGGG	GCAGCATAGTGAGCCCAGAANRG	GCAGCATAGTGAGCCCAGAANRG				0	0	0	0	43.93	0	0	0	GCTGGAGCAGAGTGAGCAAGAAGGGAAAT	0.125052	0
RNA	1	chr1	39836440	+	3	GCAAAATAATGAGCC-AGAACAG	GCAAAATAATGAGCCAGAACAG	GCAGCATAGTGAGCCCAGAANRG	GCAGCATAGTGAGCCCAGAANRG				0	0	0	0	44.88	0	0	0	GTGGCAAAATAATGAGCCAGAACAGACTC	0.174309	0
RNA	1	chr1	39836440	+	3	GCAAAATAATGAGC-CAGAACAG	GCAAAATAATGAGCCAGAACAG	GCAGCATAGTGAGCCCAGAANRG	GCAGCATAGTGAGCCCAGAANRG				0	0	0	0	45.28	0	0	0	GTGGCAAAATAATGAGCCAGAACAGACTC	0.174309	0
RNA	1	chr1	39836440	+	3	GCAAAATAATGAG-CCAGAACAG	GCAAAATAATGAGCCAGAACAG	GCAGCATAGTGAGCCCAGAANRG	GCAGCATAGTGAGCCCAGAANRG				0	0	0	0	45.88	0	0	0	GTGGCAAAATAATGAGCCAGAACAGACTC	0.174309	0
RNA	1	chr1	30010858	-	3	GCAGCATGGTCAGGC-AGAAAGG	GCAGCATGGTCAGGCAGAAAGG	GCAGCATAGTGAGCCCAGAANRG	GCAGCATAGTGAGCCCAGAANRG				0	0	0	0	43.32	0	0	0	GTGAGCAGCATGGTCAGGCAGAAAGGGCC	0.106889	0
RNA	1	chr1	30010858	-	3	GCAGCATGGTCAGG-CAGAAAGG	GCAGCATGGTCAGGCAGAAAGG	GCAGCATAGTGAGCCCAGAANRG	GCAGCATAGTGAGCCCAGAANRG				0	0	0	0	43.72	0	0	0	GTGAGCAGCATGGTCAGGCAGAAAGGGCC	0.106889	0
RNA	1	chr1	28846088	-	3	ACAGTGTAGTGAGCC-AGAAAGG	ACAGTGTAGTGAGCCAGAAAGG	GCAGCATAGTGAGCCCAGAANRG	GCAGCATAGTGAGCCCAGAANRG				0	0	0	0	45.07	0	0	0	GACGACAGTGTAGTGAGCCAGAAAGGAGG	0.153309	0
RNA	1	chr1	28846088	-	3	ACAGTGTAGTGAGC-CAGAAAGG	ACAGTGTAGTGAGCCAGAAAGG	GCAGCATAGTGAGCCCAGAANRG	GCAGCATAGTGAGCCCAGAANRG				0	0	0	0	45.47	0	0	0	GACGACAGTGTAGTGAGCCAGAAAGGAGG	0.153309	0
RNA	1	chr1	28846088	-	3	ACAGTGTAGTGAG-CCAGAAAGG	ACAGTGTAGTGAGCCAGAAAGG	GCAGCATAGTGAGCCCAGAANRG	GCAGCATAGTGAGCCCAGAANRG				0	0	0	0	46.07	0	0	0	GACGACAGTGTAGTGAGCCAGAAAGGAGG	0.153309	0
RNA	1	chr1	28196297	+	3	GCAACATAGTGAGGC-AGGATAG	GCAACATAGTGAGGCAGGATAG	GCAGCATAGTGAGCCCAGAANRG	GCAGCATAGTGAGCCCAGAANRG				0	0	0	0	39.12	0	0	0	TGAGCAACATAGTGAGGCAGGATAGTTTG	0.0477074	0
RNA	1	chr1	28196297	+	3	GCAACATAGTGAGG-CAGGATAG	GCAACATAGTGAGGCAGGATAG	GCAGCATAGTGAGCCCAGAANRG	GCAGCATAGTGAGCCCAGAANRG				0	0	0	0	39.52	0	0	0	TGAGCAACATAGTGAGGCAGGATAGTTTG	0.0477074	0
RNA	1	chr1	28196297	+	3	GCAACATAGTGAG-GCAGGATAG	GCAACATAGTGAGGCAGGATAG	GCAGCATAGTGAGCCCAGAANRG	GCAGCATAGTGAGCCCAGAANRG				0	0	0	0	39.52	0	0	0	TGAGCAACATAGTGAGGCAGGATAGTTTG	0.0477074	0
RNA	1	chr1	20370216	-	3	GCAGCACAGTGAGAA-AGAAAGG	GCAGCACAGTGAGAAAGAAAGG	GCAGCATAGTGAGCCCAGAANRG	GCAGCATAGTGAGCCCAGAANRG				0	0	0	0	42.16	0	0	0	AAGAGCAGCACAGTGAGAAAGAAAGGGAA	0.155786	0
RNA	1	chr1	20370216	-	3	GCAGCACAGTGAGA-AAGAAAGG	GCAGCACAGTGAGAAAGAAAGG	GCAGCATAGTGAGCCCAGAANRG	GCAGCATAGTGAGCCCAGAANRG				0	0	0	0	42.16	0	0	0	AAGAGCAGCACAGTGAGAAAGAAAGGGAA	0.155786	0
RNA	1	chr1	20370216	-	3	GCAGCACAGTGAG-AAAGAAAGG	GCAGCACAGTGAGAAAGAAAGG	GCAGCATAGTGAGCCCAGAANRG	GCAGCATAGTGAGCCCAGAANRG				0	0	0	0	42.16	0	0	0	AAGAGCAGCACAGTGAGAAAGAAAGGGAA	0.155786	0
RNA	1	chr1	17409494	-	3	GCAGGATTGTGAGCC-AGAGAGG	GCAGGATTGTGAGCCAGAGAGG	GCAGCATAGTGAGCCCAGAANRG	GCAGCATAGTGAGCCCAGAANRG				0	0	0	0	39.13	0	0	0	CCAGGCAGGATTGTGAGCCAGAGAGGGGG	0.0963624	0
RNA	1	chr1	30010858	-	3	GCAGCATGGTCAG-GCAGAAAGG	GCAGCATGGTCAGGCAGAAAGG	GCAGCATAGTGAGCCCAGAANRG	GCAGCATAGTGAGCCCAGAANRG				0	0	0	0	43.72	0	0	0	GTGAGCAGCATGGTCAGGCAGAAAGGGCC	0.106889	0
DNA	1	chr1	218945781	+	3	GCAGCATTGGTGTGCCCATAATAG	GCAGCATTGGTGTGCCCATAATAG	GCAGCATA-GTGAGCCCAGAANRG	GCAGCATAGTGAGCCCAGAANRG				0	0	0	0	40.98	0	0	0	ATGGCAGCATTGGTGTGCCCATAATAGAT	0.115983	0
DNA	1	chr1	163649554	+	3	GGAGCATAAGTCAGCCCATAATAG	GGAGCATAAGTCAGCCCATAATAG	GCAGCATA-GTGAGCCCAGAANRG	GCAGCATAGTGAGCCCAGAANRG				0	0	0	0	41.42	0	0	0	CAGGGAGCATAAGTCAGCCCATAATAGTA	0.118023	0
DNA	1	chr1	88729406	-	3	GCTGCATAAGTGAGCCCAGTTGAG	GCTGCATAAGTGAGCCCAGTTGAG	GCAGCATA-GTGAGCCCAGAANRG	GCAGCATAGTGAGCCCAGAANRG				0	0	0	0	41.2	0	0	0	CAGCTGCATAAGTGAGCCCAGTTGAGACC	0.163798	0
DNA	1	chr1	76710426	-	3	ACAGAATAGGTGAGCCCAGACCAG	ACAGAATAGGTGAGCCCAGACCAG	GCAGCATA-GTGAGCCCAGAANRG	GCAGCATAGTGAGCCCAGAANRG				0	0	0	0	47.04	0	0	0	AGACAGAATAGGTGAGCCCAGACCAGAGG	0.139512	0
DNA	1	chr1	30878784	+	2	GCAGCCTGGGTGAGCCCAGAAGGG	GCAGCCTGGGTGAGCCCAGAAGGG	GCAGCATA-GTGAGCCCAGAANRG	GCAGCATAGTGAGCCCAGAANRG				0	0	0	0	46.87	0	0	0	CTGGCAGCCTGGGTGAGCCCAGAAGGGCG	0.194511	0
DNA	1	chr1	22652606	+	3	GCAGAAGAGATGAGCCCAGAAAGG	GCAGAAGAGATGAGCCCAGAAAGG	GCAGCATA-GTGAGCCCAGAANRG	GCAGCATAGTGAGCCCAGAANRG				0	0	0	0	46.43	0	0	0	GAAGCAGAAGAGATGAGCCCAGAAAGGGG	0.118024	0
DNA	1	chr1	208941697	-	3	GGAGCATATTGATCCCAAGAAAAG	GGAGCATATTGATCCCAAGAAAAG	GCAGCATAGTGAGCCC-AGAANRG	GCAGCATAGTGAGCCCAGAANRG				0	0	0	0	43.12	0	0	0	TAGGAGCATATTGATCCCAAGAAAAGCCG	0.0877533	0
DNA	1	chr1	110562600	-	3	GCAGCTGAGTGACCCCTAGAACAG	GCAGCTGAGTGACCCCTAGAACAG	GCAGCATAGTGAGCCC-AGAANRG	GCAGCATAGTGAGCCCAGAANRG				0	0	0	0	43.16	0	0	0	AAGCAGCTGAGTGACCCCTAGAACAGCTT	0.117245	0
RNA	1	chr1	11312589	+	3	GCAGCATAGTCAGGACA-AAAAG	GCAGCATAGTCAGGACAAAAAG	GCAGCATAGTGAGCCCAGAANRG	GCAGCATAGTGAGCCCAGAANRG				0	0	0	0	39.99	0	0	0	AAAGCAGCATAGTCAGGACAAAAAGACAG	0.307471	0
RNA	1	chr1	213605557	-	3	GCATAATGGTGAGCCCA-AAGAG	GCATAATGGTGAGCCCAAAGAG	GCAGCATAGTGAGCCCAGAANRG	GCAGCATAGTGAGCCCAGAANRG				0	0	0	0	43.26	0	0	0	TAGTGCATAATGGTGAGCCCAAAGAGCCC	0.0609102	0
RNA	1	chr1	202603544	+	3	GGAGCAGAGTGAGCCCA-CAGAG	GGAGCAGAGTGAGCCCACAGAG	GCAGCATAGTGAGCCCAGAANRG	GCAGCATAGTGAGCCCAGAANRG				0	0	0	0	38.53	0	0	0	ACAGGAGCAGAGTGAGCCCACAGAGGTGG	0.340962	0
RNA	1	chr1	167882732	+	3	CCAGCATAGTGAGCTCA-GACGG	CCAGCATAGTGAGCTCAGACGG	GCAGCATAGTGAGCCCAGAANRG	GCAGCATAGTGAGCCCAGAANRG				0	0	0	0	36.87	0	0	0	AGCCCAGCATAGTGAGCTCAGACGGGGAT	0.524341	0
RNA	1	chr1	86472244	-	3	GCAGCATGGTGAGCCCT-AGTAG	GCAGCATGGTGAGCCCTAGTAG	GCAGCATAGTGAGCCCAGAANRG	GCAGCATAGTGAGCCCAGAANRG				0	0	0	0	34.62	0	0	0	CTTGGCAGCATGGTGAGCCCTAGTAGTGG	0.0980575	0
RNA	1	chr1	31317486	+	3	GCAGCAAAGTGAGAACA-AATGG	GCAGCAAAGTGAGAACAAATGG	GCAGCATAGTGAGCCCAGAANRG	GCAGCATAGTGAGCCCAGAANRG				0	0	0	0	40.46	0	0	0	GCAGCAGCAAAGTGAGAACAAATGGGAAC	0.0726704	0
RNA	1	chr1	20209836	+	3	GCATCACAGTGACCCCA-AAGAG	GCATCACAGTGACCCCAAAGAG	GCAGCATAGTGAGCCCAGAANRG	GCAGCATAGTGAGCCCAGAANRG				0	0	0	0	42.39	0	0	0	AAGGCATCACAGTGACCCCAAAGAGGCAT	0.0982921	0
DNA	1	chr1	193025960	+	3	ACAGACTAGTGAGCCCAGAAATAG	ACAGACTAGTGAGCCCAGAAATAG	GCAGCATAGTGAGCCCAG-AANRG	GCAGCATAGTGAGCCCAGAANRG				0	0	0	0	42.18	0	0	0	TGGACAGACTAGTGAGCCCAGAAATAGAC	0.535594	0
DNA	1	chr1	187690859	-	3	CTAGAATAGTGAGCCCAGAAATAG	CTAGAATAGTGAGCCCAGAAATAG	GCAGCATAGTGAGCCCAG-AANRG	GCAGCATAGTGAGCCCAGAANRG				0	0	0	0	42.26	0	0	0	ATCTAGAATAGTGAGCCCAGAAATAGACC	0.136841	0
DNA	1	chr1	187147031	-	3	ACAGAATAGAGAGCCCAGAAATAG	ACAGAATAGAGAGCCCAGAAATAG	GCAGCATAGTGAGCCCAG-AANRG	GCAGCATAGTGAGCCCAGAANRG				0	0	0	0	41.89	0	0	0	TAACAGAATAGAGAGCCCAGAAATAGACT	0.118987	0
DNA	1	chr1	187247590	+	3	GCAGAATAGAGAGCCTAGAAATGG	GCAGAATAGAGAGCCTAGAAATGG	GCAGCATAGTGAGCCCAG-AANRG	GCAGCATAGTGAGCCCAGAANRG				0	0	0	0	39.71	0	0	0	GAAGCAGAATAGAGAGCCTAGAAATGGAT	0.42163	0
DNA	1	chr1	175043347	-	3	GCAGAATAGAGAACCCAGAAACAG	GCAGAATAGAGAACCCAGAAACAG	GCAGCATAGTGAGCCCAG-AANRG	GCAGCATAGTGAGCCCAGAANRG				0	0	0	0	40.91	0	0	0	GAGCAGAATAGAGAACCCAGAAACAGATT	0.124499	0
DNA	1	chr1	97708470	-	3	ACAGAATAGAGAGCCCAGAAATAG	ACAGAATAGAGAGCCCAGAAATAG	GCAGCATAGTGAGCCCAG-AANRG	GCAGCATAGTGAGCCCAGAANRG				0	0	0	0	41.89	0	0	0	GAACAGAATAGAGAGCCCAGAAATAGACA	0.117766	0
DNA	1	chr1	93725910	-	3	ACAGAATAGAGAGCCCAGAAATAG	ACAGAATAGAGAGCCCAGAAATAG	GCAGCATAGTGAGCCCAG-AANRG	GCAGCATAGTGAGCCCAGAANRG				0	0	0	0	41.89	0	0	0	GAACAGAATAGAGAGCCCAGAAATAGACC	0.117788	0
DNA	1	chr1	90803812	-	3	ACAGAATAGAGAGCCCAGAAATAG	ACAGAATAGAGAGCCCAGAAATAG	GCAGCATAGTGAGCCCAG-AANRG	GCAGCATAGTGAGCCCAGAANRG				0	0	0	0	41.89	0	0	0	GAACAGAATAGAGAGCCCAGAAATAGACC	0.117788	0
DNA	1	chr1	85423093	-	3	ACAGAATAGAGAGCCCAGAAATAG	ACAGAATAGAGAGCCCAGAAATAG	GCAGCATAGTGAGCCCAG-AANRG	GCAGCATAGTGAGCCCAGAANRG				0	0	0	0	41.89	0	0	0	AAACAGAATAGAGAGCCCAGAAATAGACC	0.116496	0
DNA	1	chr1	72819598	+	2	GCAGAATAGAGAGCCCAGAAATAG	GCAGAATAGAGAGCCCAGAAATAG	GCAGCATAGTGAGCCCAG-AANRG	GCAGCATAGTGAGCCCAGAANRG				0	0	0	0	42.01	0	0	0	GTGGCAGAATAGAGAGCCCAGAAATAGGG	0.680575	0
DNA	1	chr1	228189061	-	3	ACAGAATAGAGAGCCCAGAAAAAG	ACAGAATAGAGAGCCCAGAAAAAG	GCAGCATAGTGAGCCCAG-AANRG	GCAGCATAGTGAGCCCAGAANRG				0	0	0	0	41.89	0	0	0	GAACAGAATAGAGAGCCCAGAAAAAGCCC	0.130538	0
DNA	1	chr1	69490299	+	3	ACAGAATAGAGAGCCCAGGAATAG	ACAGAATAGAGAGCCCAGGAATAG	GCAGCATAGTGAGCCCAG-AANRG	GCAGCATAGTGAGCCCAGAANRG				0	0	0	0	41.89	0	0	0	GGAACAGAATAGAGAGCCCAGGAATAGAC	0.282746	0
DNA	1	chr1	29615504	-	3	CCAGAATAGAGAGCCCAGAAATAG	CCAGAATAGAGAGCCCAGAAATAG	GCAGCATAGTGAGCCCAG-AANRG	GCAGCATAGTGAGCCCAGAANRG				0	0	0	0	41.89	0	0	0	GACCAGAATAGAGAGCCCAGAAATAGACC	0.10528	0
DNA	1	chr1	63559846	-	3	ACAGAATAGAGAGCCCAGAAATAG	ACAGAATAGAGAGCCCAGAAATAG	GCAGCATAGTGAGCCCAG-AANRG	GCAGCATAGTGAGCCCAGAANRG				0	0	0	0	41.89	0	0	0	GAACAGAATAGAGAGCCCAGAAATAGACC	0.117788	0
DNA	1	chr1	233805032	+	3	GCCCGATAGTGAGCCCAGAAATAG	GCCCGATAGTGAGCCCAGAAATAG	GCAGCATAGTGAGCCCAG-AANRG	GCAGCATAGTGAGCCCAGAANRG				0	0	0	0	42.19	0	0	0	GGAGCCCGATAGTGAGCCCAGAAATAGGC	0.594188	0
DNA	1	chr1	244138390	+	3	GAGGCATGGTGAGCCCAGCAACAG	GAGGCATGGTGAGCCCAGCAACAG	GCAGCATAGTGAGCCCAG-AANRG	GCAGCATAGTGAGCCCAGAANRG				0	0	0	0	42.15	0	0	0	TGTGAGGCATGGTGAGCCCAGCAACAGAT	0.222924	0
RNA	1	chr1	18669509	-	3	GCA-AATACTGAGCCCAGAGAGG	GCAAATACTGAGCCCAGAGAGG	GCAGCATAGTGAGCCCAGAANRG	GCAGCATAGTGAGCCCAGAANRG				0	0	0	0	41.18	0	0	0	AGATGCAAATACTGAGCCCAGAGAGGGAA	0.14119	0
RNA	1	chr1	26179115	+	3	GCA-CATAGTAAGCCCTCAATAG	GCACATAGTAAGCCCTCAATAG	GCAGCATAGTGAGCCCAGAANRG	GCAGCATAGTGAGCCCAGAANRG				0	0	0	0	40.02	0	0	0	ATAGCACATAGTAAGCCCTCAATAGACAC	0.140711	0
RNA	1	chr1	50125366	+	3	GCA-CACAGTGAGGCCACAATAG	GCACACAGTGAGGCCACAATAG	GCAGCATAGTGAGCCCAGAANRG	GCAGCATAGTGAGCCCAGAANRG				0	0	0	0	42.19	0	0	0	GTGGCACACAGTGAGGCCACAATAGTTCA	0.124125	0
RNA	1	chr1	89849958	-	3	CAA-CATTGTGAGCCCAGAATAG	CAACATTGTGAGCCCAGAATAG	GCAGCATAGTGAGCCCAGAANRG	GCAGCATAGTGAGCCCAGAANRG				0	0	0	0	47.2	0	0	0	GAGACAACATTGTGAGCCCAGAATAGGGG	0.373305	0
RNA	1	chr1	226372120	-	3	GCA-CATCCTGAGTCCAGAAGGG	GCACATCCTGAGTCCAGAAGGG	GCAGCATAGTGAGCCCAGAANRG	GCAGCATAGTGAGCCCAGAANRG				0	0	0	0	45.8	0	0	0	GAGGGCACATCCTGAGTCCAGAAGGGAAT	0.108323	0
RNA	1	chr1	204424840	-	3	GCA-CCTTGTGAGCCCAGCAGAG	GCACCTTGTGAGCCCAGCAGAG	GCAGCATAGTGAGCCCAGAANRG	GCAGCATAGTGAGCCCAGAANRG				0	0	0	0	42.24	0	0	0	CATGGCACCTTGTGAGCCCAGCAGAGCCA	0.0397217	0
RNA	1	chr1	201206257	+	3	GCA-CATAGCCAGCCCAGACAGG	GCACATAGCCAGCCCAGACAGG	GCAGCATAGTGAGCCCAGAANRG	GCAGCATAGTGAGCCCAGAANRG				0	0	0	0	40.52	0	0	0	CCAGCACATAGCCAGCCCAGACAGGGATG	0.215597	0
RNA	1	chr1	164868327	+	3	GCA-GCTAGTGAGCCCAGAGGAG	GCAGCTAGTGAGCCCAGAGGAG	GCAGCATAGTGAGCCCAGAANRG	GCAGCATAGTGAGCCCAGAANRG				0	0	0	0	41.32	0	0	0	TAGGCAGCTAGTGAGCCCAGAGGAGCAGG	0.205557	0
RNA	1	chr1	157797377	-	2	ACA-CATGGTGAGCCCAGAATAG	ACACATGGTGAGCCCAGAATAG	GCAGCATAGTGAGCCCAGAANRG	GCAGCATAGTGAGCCCAGAANRG				0	0	0	0	47.33	0	0	0	TCCTACACATGGTGAGCCCAGAATAGCTG	0.247057	0
RNA	1	chr1	118919418	+	3	GCA-CATAGAGAGCCAATAATAG	GCACATAGAGAGCCAATAATAG	GCAGCATAGTGAGCCCAGAANRG	GCAGCATAGTGAGCCCAGAANRG				0	0	0	0	40.92	0	0	0	TTGGCACATAGAGAGCCAATAATAGTAAT	0.131556	0
RNA	1	chr1	116430158	-	3	TCA-CATAGTAAGCCCAAAATAG	TCACATAGTAAGCCCAAAATAG	GCAGCATAGTGAGCCCAGAANRG	GCAGCATAGTGAGCCCAGAANRG				0	0	0	0	42.9	0	0	0	CTCCTCACATAGTAAGCCCAAAATAGAGC	0.0939477	0
RNA	1	chr1	99642184	-	3	GCA-CAATTTGAGCCCAGAAAAG	GCACAATTTGAGCCCAGAAAAG	GCAGCATAGTGAGCCCAGAANRG	GCAGCATAGTGAGCCCAGAANRG				0	0	0	0	46.87	0	0	0	TATTGCACAATTTGAGCCCAGAAAAGTAT	0.0989509	0
DNA	1	chr1	232701503	+	3	GCAGTATCAGTGAGCACAGAGCAG	GCAGTATCAGTGAGCACAGAGCAG	GCAGCAT-AGTGAGCCCAGAANRG	GCAGCATAGTGAGCCCAGAANRG				0	0	0	0	44.94	0	0	0	GCTGCAGTATCAGTGAGCACAGAGCAGTG	0.146149	0
DNA	1	chr1	218945781	+	3	GCAGCATTGGTGTGCCCATAATAG	GCAGCATTGGTGTGCCCATAATAG	GCAGCAT-AGTGAGCCCAGAANRG	GCAGCATAGTGAGCCCAGAANRG				0	0	0	0	40.98	0	0	0	ATGGCAGCATTGGTGTGCCCATAATAGAT	0.115983	0
DNA	1	chr1	183391052	+	3	GCAGCATCAATGAGCATAGAAGAG	GCAGCATCAATGAGCATAGAAGAG	GCAGCAT-AGTGAGCCCAGAANRG	GCAGCATAGTGAGCCCAGAANRG				0	0	0	0	41.63	0	0	0	TTTGCAGCATCAATGAGCATAGAAGAGTT	0.137132	0
DNA	1	chr1	163649554	+	3	GGAGCATAAGTCAGCCCATAATAG	GGAGCATAAGTCAGCCCATAATAG	GCAGCAT-AGTGAGCCCAGAANRG	GCAGCATAGTGAGCCCAGAANRG				0	0	0	0	41.5	0	0	0	CAGGGAGCATAAGTCAGCCCATAATAGTA	0.118023	0
DNA	1	chr1	88729406	-	3	GCTGCATAAGTGAGCCCAGTTGAG	GCTGCATAAGTGAGCCCAGTTGAG	GCAGCAT-AGTGAGCCCAGAANRG	GCAGCATAGTGAGCCCAGAANRG				0	0	0	0	41.28	0	0	0	CAGCTGCATAAGTGAGCCCAGTTGAGACC	0.163798	0
DNA	1	chr1	41400417	+	3	GATGCATGAGTGAGCCCAGCAAAG	GATGCATGAGTGAGCCCAGCAAAG	GCAGCAT-AGTGAGCCCAGAANRG	GCAGCATAGTGAGCCCAGAANRG				0	0	0	0	41.15	0	0	0	GCAGATGCATGAGTGAGCCCAGCAAAGGC	0.101778	0
DNA	1	chr1	30878784	+	2	GCAGCCTGGGTGAGCCCAGAAGGG	GCAGCCTGGGTGAGCCCAGAAGGG	GCAGCAT-AGTGAGCCCAGAANRG	GCAGCATAGTGAGCCCAGAANRG				0	0	0	0	46.87	0	0	0	CTGGCAGCCTGGGTGAGCCCAGAAGGGCG	0.194511	0
RNA	1	chr5	179814376	-	3	GCAGAATTGTGAACCCAG-AAGG	GCAGAATTGTGAACCCAGAAGG	GCAGCATAGTGAGCCCAGAANRG	GCAGCATAGTGAGCCCAGAANRG				0	0	0	0	41.33	0	0	0	GGAAGCAGAATTGTGAACCCAGAAGGGCC	0.104067	0
RNA	1	chr5	151632134	-	3	GCCTCATAGGGAGCCCAG-ACAG	GCCTCATAGGGAGCCCAGACAG	GCAGCATAGTGAGCCCAGAANRG	GCAGCATAGTGAGCCCAGAANRG				0	0	0	0	42.07	0	0	0	AAAAGCCTCATAGGGAGCCCAGACAGTTA	0.0497237	0
RNA	1	chr5	92945776	-	3	GCAGCACAGAGAGCCCAC-ATGG	GCAGCACAGAGAGCCCACATGG	GCAGCATAGTGAGCCCAGAANRG	GCAGCATAGTGAGCCCAGAANRG				0	0	0	0	38.16	0	0	0	CTTGGCAGCACAGAGAGCCCACATGGTGA	0.110344	0
RNA	1	chr5	6897455	+	3	ACAGAATAGAGAGCCCAG-AAAG	ACAGAATAGAGAGCCCAGAAAG	GCAGCATAGTGAGCCCAGAANRG	GCAGCATAGTGAGCCCAGAANRG				0	0	0	0	42.08	0	0	0	AGAACAGAATAGAGAGCCCAGAAAGAAGA	0.415701	0
DNA	1	chr5	135610139	+	3	CCAGCATGGAGAGCCCAGGAAAGG	CCAGCATGGAGAGCCCAGGAAAGG	GCAGCATAGTGAGCCCA-GAANRG	GCAGCATAGTGAGCCCAGAANRG				0	0	0	0	42.81	0	0	0	GCTCCAGCATGGAGAGCCCAGGAAAGGGG	0.173543	0
DNA	1	chr5	124220624	-	3	GCTGCATAGTGAGCTAAAGAAAAG	GCTGCATAGTGAGCTAAAGAAAAG	GCAGCATAGTGAGCCCA-GAANRG	GCAGCATAGTGAGCCCAGAANRG				0	0	0	0	39.35	0	0	0	TTGCTGCATAGTGAGCTAAAGAAAAGCCT	0.140856	0
DNA	1	chr5	107593153	+	3	GCAGCTGAGTGAGCCCATGACTGG	GCAGCTGAGTGAGCCCATGACTGG	GCAGCATAGTGAGCCCA-GAANRG	GCAGCATAGTGAGCCCAGAANRG				0	0	0	0	43.26	0	0	0	AGAGCAGCTGAGTGAGCCCATGACTGGAA	0.38439	0
RNA	1	chr5	179411677	+	3	GCAGCA-AGTGAACCCGGGATGG	GCAGCAAGTGAACCCGGGATGG	GCAGCATAGTGAGCCCAGAANRG	GCAGCATAGTGAGCCCAGAANRG				0	0	0	0	38.56	0	0	0	GAAGCAGCAAGTGAACCCGGGATGGGGAG	0.139484	0
RNA	1	chr5	139214342	+	3	GCAGAA-ACTGAGCTCAGAAAAG	GCAGAAACTGAGCTCAGAAAAG	GCAGCATAGTGAGCCCAGAANRG	GCAGCATAGTGAGCCCAGAANRG				0	0	0	0	45.22	0	0	0	GATGCAGAAACTGAGCTCAGAAAAGTTGA	0.135619	0
RNA	1	chr5	136814884	-	3	GCAGCA-TGTGCTCCCAGAAGAG	GCAGCATGTGCTCCCAGAAGAG	GCAGCATAGTGAGCCCAGAANRG	GCAGCATAGTGAGCCCAGAANRG				0	0	0	0	45.49	0	0	0	CCCTGCAGCATGTGCTCCCAGAAGAGACT	0.258563	0
RNA	1	chr5	130313325	+	3	GCAGAA-AGGGAGCCCAAAAGAG	GCAGAAAGGGAGCCCAAAAGAG	GCAGCATAGTGAGCCCAGAANRG	GCAGCATAGTGAGCCCAGAANRG				0	0	0	0	42.97	0	0	0	ATAGCAGAAAGGGAGCCCAAAAGAGGGTT	0.171917	0
RNA	1	chr5	115170561	-	3	CCAGCA-AGTGAAGCCAGAAGAG	CCAGCAAGTGAAGCCAGAAGAG	GCAGCATAGTGAGCCCAGAANRG	GCAGCATAGTGAGCCCAGAANRG				0	0	0	0	45.14	0	0	0	TCACCCAGCAAGTGAAGCCAGAAGAGAAC	0.0853825	0
RNA	1	chr5	98131199	-	3	GAAGCA-AGTGAACCCAGTATAG	GAAGCAAGTGAACCCAGTATAG	GCAGCATAGTGAGCCCAGAANRG	GCAGCATAGTGAGCCCAGAANRG				0	0	0	0	41.43	0	0	0	GCCGGAAGCAAGTGAACCCAGTATAGACC	0.0523825	0
RNA	1	chr5	14023900	-	3	GCAGGA-AGTGAGCCCTCAACAG	GCAGGAAGTGAGCCCTCAACAG	GCAGCATAGTGAGCCCAGAANRG	GCAGCATAGTGAGCCCAGAANRG				0	0	0	0	40.47	0	0	0	CAAGGCAGGAAGTGAGCCCTCAACAGAAA	0.0556658	0
DNA	1	chr5	124220624	-	3	GCTGCATAGTGAGCTAAAGAAAAG	GCTGCATAGTGAGCTAAAGAAAAG	GCAGCATAGTGAGCC-CAGAANRG	GCAGCATAGTGAGCCCAGAANRG				0	0	0	0	40.35	0	0	0	TTGCTGCATAGTGAGCTAAAGAAAAGCCT	0.140856	0
DNA	1	chr5	175210702	+	3	GCAGCAAGAGTGAGGCCAGATGGG	GCAGCAAGAGTGAGGCCAGATGGG	GCAGCA-TAGTGAGCCCAGAANRG	GCAGCATAGTGAGCCCAGAANRG				0	0	0	0	45.3	0	0	0	AAAGCAGCAAGAGTGAGGCCAGATGGGTT	0.132688	0
DNA	1	chr5	142834565	-	2	GCTGCACAAGTGAGCCCAGAAGAG	GCTGCACAAGTGAGCCCAGAAGAG	GCAGCA-TAGTGAGCCCAGAANRG	GCAGCATAGTGAGCCCAGAANRG				0	0	0	0	47.05	0	0	0	TAGCTGCACAAGTGAGCCCAGAAGAGGAC	0.3335	0
DNA	1	chr5	177359489	+	3	GCAGCAGAGGGGGCCCAGAGACAG	GCAGCAGAGGGGGCCCAGAGACAG	GCAGCATAGTGAGCCCAGA-ANRG	GCAGCATAGTGAGCCCAGAANRG				0	0	0	0	40.17	0	0	0	AGGGCAGCAGAGGGGGCCCAGAGACAGAC	0.178595	0
DNA	1	chr5	169238033	-	3	ACAGAATAGCGAGCCCAGAAATAG	ACAGAATAGCGAGCCCAGAAATAG	GCAGCATAGTGAGCCCAGA-ANRG	GCAGCATAGTGAGCCCAGAANRG				0	0	0	0	40.89	0	0	0	GGACAGAATAGCGAGCCCAGAAATAGACC	0.148696	0
DNA	1	chr5	164872723	+	3	GCAGGATAGAGAGTCCAGAAATAG	GCAGGATAGAGAGTCCAGAAATAG	GCAGCATAGTGAGCCCAGA-ANRG	GCAGCATAGTGAGCCCAGAANRG				0	0	0	0	39.71	0	0	0	GGAGCAGGATAGAGAGTCCAGAAATAGAT	0.473371	0
DNA	1	chr5	157412202	+	3	GCAGAATAGACAGCCCAGAAATAG	GCAGAATAGACAGCCCAGAAATAG	GCAGCATAGTGAGCCCAGA-ANRG	GCAGCATAGTGAGCCCAGAANRG				0	0	0	0	40.31	0	0	0	GGAGCAGAATAGACAGCCCAGAAATAGGA	0.469694	0
DNA	1	chr5	152974856	-	3	GCAGAATAATGACCCCAGAGATGG	GCAGAATAATGACCCCAGAGATGG	GCAGCATAGTGAGCCCAGA-ANRG	GCAGCATAGTGAGCCCAGAANRG				0	0	0	0	40.06	0	0	0	AGGCAGAATAATGACCCCAGAGATGGCTA	0.206263	0
DNA	1	chr5	141632493	+	3	GCAGCATAAATAGCCCAGAGATAG	GCAGCATAAATAGCCCAGAGATAG	GCAGCATAGTGAGCCCAGA-ANRG	GCAGCATAGTGAGCCCAGAANRG				0	0	0	0	40.15	0	0	0	GATGCAGCATAAATAGCCCAGAGATAGTA	0.385923	0
DNA	1	chr5	140618076	+	3	ACAGAATAGAGAGCCCAGAAACAG	ACAGAATAGAGAGCCCAGAAACAG	GCAGCATAGTGAGCCCAGA-ANRG	GCAGCATAGTGAGCCCAGAANRG				0	0	0	0	40.89	0	0	0	GGAACAGAATAGAGAGCCCAGAAACAGAC	0.359547	0
DNA	1	chr5	134492317	-	3	TCAGAAGAGTGAGCCCAGAAAAGG	TCAGAAGAGTGAGCCCAGAAAAGG	GCAGCATAGTGAGCCCAGA-ANRG	GCAGCATAGTGAGCCCAGAANRG				0	0	0	0	41.16	0	0	0	CTTCAGAAGAGTGAGCCCAGAAAAGGTGG	0.179507	0
DNA	1	chr5	96543880	-	3	ACAGAATAGAGAGCCCAGAAACAG	ACAGAATAGAGAGCCCAGAAACAG	GCAGCATAGTGAGCCCAGA-ANRG	GCAGCATAGTGAGCCCAGAANRG				0	0	0	0	40.89	0	0	0	GAACAGAATAGAGAGCCCAGAAACAGATT	0.131011	0
DNA	1	chr5	87632488	+	3	GCAGAATAGAAAGCCCAGAAACAG	GCAGAATAGAAAGCCCAGAAACAG	GCAGCATAGTGAGCCCAGA-ANRG	GCAGCATAGTGAGCCCAGAANRG				0	0	0	0	40.31	0	0	0	GTGGCAGAATAGAAAGCCCAGAAACAGAC	0.372397	0
DNA	1	chr5	84621248	+	3	ACAGGATAGAGAGCCCAGAAATAG	ACAGGATAGAGAGCCCAGAAATAG	GCAGCATAGTGAGCCCAGA-ANRG	GCAGCATAGTGAGCCCAGAANRG				0	0	0	0	40.89	0	0	0	GAAACAGGATAGAGAGCCCAGAAATAGAC	0.457402	0
DNA	1	chr5	84442715	+	3	ACAGAATAGAGAGCCCAGAAATAG	ACAGAATAGAGAGCCCAGAAATAG	GCAGCATAGTGAGCCCAGA-ANRG	GCAGCATAGTGAGCCCAGAANRG				0	0	0	0	40.89	0	0	0	GGAACAGAATAGAGAGCCCAGAAATAGAT	0.460785	0
DNA	1	chr5	45815786	+	3	CCAGAATAGAGAGCCCAGAAATAG	CCAGAATAGAGAGCCCAGAAATAG	GCAGCATAGTGAGCCCAGA-ANRG	GCAGCATAGTGAGCCCAGAANRG				0	0	0	0	40.89	0	0	0	AGACCAGAATAGAGAGCCCAGAAATAGAC	0.4437	0
DNA	1	chr5	36097392	-	3	CCAGAATAGAGAGCCCAGAAATAG	CCAGAATAGAGAGCCCAGAAATAG	GCAGCATAGTGAGCCCAGA-ANRG	GCAGCATAGTGAGCCCAGAANRG				0	0	0	0	40.89	0	0	0	GACCAGAATAGAGAGCCCAGAAATAGACC	0.10528	0
DNA	1	chr5	35578840	-	3	ACAGAATAGAGAGCCCAGAAATAG	ACAGAATAGAGAGCCCAGAAATAG	GCAGCATAGTGAGCCCAGA-ANRG	GCAGCATAGTGAGCCCAGAANRG				0	0	0	0	40.89	0	0	0	GAACAGAATAGAGAGCCCAGAAATAGACT	0.118474	0
DNA	1	chr5	173553883	-	3	GCAGCAAAGTGAGCTCTAAAAGAG	GCAGCAAAGTGAGCTCTAAAAGAG	GCAGCATAGTGAGCCC-AGAANRG	GCAGCATAGTGAGCCCAGAANRG				0	0	0	0	37.57	0	0	0	AGGCAGCAAAGTGAGCTCTAAAAGAGCCT	0.127842	0
DNA	1	chr5	124220624	-	3	GCTGCATAGTGAGCTAAAGAAAAG	GCTGCATAGTGAGCTAAAGAAAAG	GCAGCATAGTGAGCCC-AGAANRG	GCAGCATAGTGAGCCCAGAANRG				0	0	0	0	40.35	0	0	0	TTGCTGCATAGTGAGCTAAAGAAAAGCCT	0.140856	0
RNA	1	chr5	174104119	-	3	GCAGCATGGTGTGCT-AGAAAGG	GCAGCATGGTGTGCTAGAAAGG	GCAGCATAGTGAGCCCAGAANRG	GCAGCATAGTGAGCCCAGAANRG				0	0	0	0	42.62	0	0	0	GCAGGCAGCATGGTGTGCTAGAAAGGGGG	0.105684	0
RNA	1	chr5	174104119	-	3	GCAGCATGGTGTGC-TAGAAAGG	GCAGCATGGTGTGCTAGAAAGG	GCAGCATAGTGAGCCCAGAANRG	GCAGCATAGTGAGCCCAGAANRG				0	0	0	0	42.62	0	0	0	GCAGGCAGCATGGTGTGCTAGAAAGGGGG	0.105684	0
RNA	1	chr5	174104119	-	3	GCAGCATGGTGTG-CTAGAAAGG	GCAGCATGGTGTGCTAGAAAGG	GCAGCATAGTGAGCCCAGAANRG	GCAGCATAGTGAGCCCAGAANRG				0	0	0	0	43.22	0	0	0	GCAGGCAGCATGGTGTGCTAGAAAGGGGG	0.105684	0
RNA	1	chr5	105185	-	3	GGAGCAT-GAGAACCCAGAACAG	GGAGCATGAGAACCCAGAACAG	GCAGCATAGTGAGCCCAGAANRG	GCAGCATAGTGAGCCCAGAANRG				0	0	0	0	45.89	0	0	0	GACAGGAGCATGAGAACCCAGAACAGCCC	0.0647332	0
RNA	1	chr5	163727336	+	3	GCAGAATTGTGAGCC-AAAATGG	GCAGAATTGTGAGCCAAAATGG	GCAGCATAGTGAGCCCAGAANRG	GCAGCATAGTGAGCCCAGAANRG				0	0	0	0	41.13	0	0	0	CCAGCAGAATTGTGAGCCAAAATGGACTG	0.0397819	0
RNA	1	chr5	163727336	+	3	GCAGAATTGTGAG-CCAAAATGG	GCAGAATTGTGAGCCAAAATGG	GCAGCATAGTGAGCCCAGAANRG	GCAGCATAGTGAGCCCAGAANRG				0	0	0	0	42.13	0	0	0	CCAGCAGAATTGTGAGCCAAAATGGACTG	0.0397819	0
DNA	1	chr5	175210702	+	3	GCAGCAAGAGTGAGGCCAGATGGG	GCAGCAAGAGTGAGGCCAGATGGG	GCAGC-ATAGTGAGCCCAGAANRG	GCAGCATAGTGAGCCCAGAANRG				0	0	0	0	45.32	0	0	0	AAAGCAGCAAGAGTGAGGCCAGATGGGTT	0.132688	0
DNA	1	chr5	142834565	-	3	GCTGCACAAGTGAGCCCAGAAGAG	GCTGCACAAGTGAGCCCAGAAGAG	GCAGC-ATAGTGAGCCCAGAANRG	GCAGCATAGTGAGCCCAGAANRG				0	0	0	0	46.84	0	0	0	TAGCTGCACAAGTGAGCCCAGAAGAGGAC	0.3335	0
RNA	1	chr5	158864825	+	3	GCAGCACAGTGAGCG-AGGAGGG	GCAGCACAGTGAGCGAGGAGGG	GCAGCATAGTGAGCCCAGAANRG	GCAGCATAGTGAGCCCAGAANRG				0	0	0	0	38.46	0	0	0	GCTGCAGCACAGTGAGCGAGGAGGGAGGT	0.0852476	0
RNA	1	chr5	158864825	+	3	GCAGCACAGTGAGC-GAGGAGGG	GCAGCACAGTGAGCGAGGAGGG	GCAGCATAGTGAGCCCAGAANRG	GCAGCATAGTGAGCCCAGAANRG				0	0	0	0	38.46	0	0	0	GCTGCAGCACAGTGAGCGAGGAGGGAGGT	0.0852476	0
RNA	1	chr5	158864825	+	3	GCAGCACAGTGAG-CGAGGAGGG	GCAGCACAGTGAGCGAGGAGGG	GCAGCATAGTGAGCCCAGAANRG	GCAGCATAGTGAGCCCAGAANRG				0	0	0	0	39.06	0	0	0	GCTGCAGCACAGTGAGCGAGGAGGGAGGT	0.0852476	0
RNA	1	chr5	117039246	+	3	GCAGCCTCCTGAGCC-AGAATAG	GCAGCCTCCTGAGCCAGAATAG	GCAGCATAGTGAGCCCAGAANRG	GCAGCATAGTGAGCCCAGAANRG				0	0	0	0	44.76	0	0	0	TGGGCAGCCTCCTGAGCCAGAATAGAATC	0.139741	0
RNA	1	chr5	117039246	+	3	GCAGCCTCCTGAGC-CAGAATAG	GCAGCCTCCTGAGCCAGAATAG	GCAGCATAGTGAGCCCAGAANRG	GCAGCATAGTGAGCCCAGAANRG				0	0	0	0	45.16	0	0	0	TGGGCAGCCTCCTGAGCCAGAATAGAATC	0.139741	0
RNA	1	chr5	117039246	+	3	GCAGCCTCCTGAG-CCAGAATAG	GCAGCCTCCTGAGCCAGAATAG	GCAGCATAGTGAGCCCAGAANRG	GCAGCATAGTGAGCCCAGAANRG				0	0	0	0	45.76	0	0	0	TGGGCAGCCTCCTGAGCCAGAATAGAATC	0.139741	0
RNA	1	chr5	78356070	+	3	GCAGAATAGGGAGCC-AGATAGG	GCAGAATAGGGAGCCAGATAGG	GCAGCATAGTGAGCCCAGAANRG	GCAGCATAGTGAGCCCAGAANRG				0	0	0	0	38.9	0	0	0	GTGGCAGAATAGGGAGCCAGATAGGCTGG	0.166894	0
RNA	1	chr5	78356070	+	3	GCAGAATAGGGAGC-CAGATAGG	GCAGAATAGGGAGCCAGATAGG	GCAGCATAGTGAGCCCAGAANRG	GCAGCATAGTGAGCCCAGAANRG				0	0	0	0	39.3	0	0	0	GTGGCAGAATAGGGAGCCAGATAGGCTGG	0.166894	0
RNA	1	chr5	78356070	+	3	GCAGAATAGGGAG-CCAGATAGG	GCAGAATAGGGAGCCAGATAGG	GCAGCATAGTGAGCCCAGAANRG	GCAGCATAGTGAGCCCAGAANRG				0	0	0	0	39.9	0	0	0	GTGGCAGAATAGGGAGCCAGATAGGCTGG	0.166894	0
RNA	1	chr5	63962646	+	3	GAAGCATAGGGAGCC-TGAATGG	GAAGCATAGGGAGCCTGAATGG	GCAGCATAGTGAGCCCAGAANRG	GCAGCATAGTGAGCCCAGAANRG				0	0	0	0	41.96	0	0	0	AAGGAAGCATAGGGAGCCTGAATGGGAAG	0.100031	0
RNA	1	chr5	163727336	+	3	GCAGAATTGTGAGC-CAAAATGG	GCAGAATTGTGAGCCAAAATGG	GCAGCATAGTGAGCCCAGAANRG	GCAGCATAGTGAGCCCAGAANRG				0	0	0	0	41.53	0	0	0	CCAGCAGAATTGTGAGCCAAAATGGACTG	0.0397819	0
RNA	1	chr5	63962646	+	3	GAAGCATAGGGAGC-CTGAATGG	GAAGCATAGGGAGCCTGAATGG	GCAGCATAGTGAGCCCAGAANRG	GCAGCATAGTGAGCCCAGAANRG				0	0	0	0	42.36	0	0	0	AAGGAAGCATAGGGAGCCTGAATGGGAAG	0.100031	0
RNA	1	chr5	55604039	+	3	GCAGCATCCTGAGCC-AGAGTAG	GCAGCATCCTGAGCCAGAGTAG	GCAGCATAGTGAGCCCAGAANRG	GCAGCATAGTGAGCCCAGAANRG				0	0	0	0	38.97	0	0	0	TGGGCAGCATCCTGAGCCAGAGTAGGCTC	0.160703	0
RNA	1	chr5	55604039	+	3	GCAGCATCCTGAGC-CAGAGTAG	GCAGCATCCTGAGCCAGAGTAG	GCAGCATAGTGAGCCCAGAANRG	GCAGCATAGTGAGCCCAGAANRG				0	0	0	0	39.37	0	0	0	TGGGCAGCATCCTGAGCCAGAGTAGGCTC	0.160703	0
RNA	1	chr5	55604039	+	3	GCAGCATCCTGAG-CCAGAGTAG	GCAGCATCCTGAGCCAGAGTAG	GCAGCATAGTGAGCCCAGAANRG	GCAGCATAGTGAGCCCAGAANRG				0	0	0	0	39.97	0	0	0	TGGGCAGCATCCTGAGCCAGAGTAGGCTC	0.160703	0
RNA	1	chr5	40102172	-	3	GGGGCATAGTGGGCC-AGAATGG	GGGGCATAGTGGGCCAGAATGG	GCAGCATAGTGAGCCCAGAANRG	GCAGCATAGTGAGCCCAGAANRG				0	0	0	0	44.51	0	0	0	GACGGGGGCATAGTGGGCCAGAATGGTCT	0.0874723	0
RNA	1	chr5	40102172	-	3	GGGGCATAGTGGGC-CAGAATGG	GGGGCATAGTGGGCCAGAATGG	GCAGCATAGTGAGCCCAGAANRG	GCAGCATAGTGAGCCCAGAANRG				0	0	0	0	44.91	0	0	0	GACGGGGGCATAGTGGGCCAGAATGGTCT	0.0874723	0
RNA	1	chr5	40102172	-	3	GGGGCATAGTGGG-CCAGAATGG	GGGGCATAGTGGGCCAGAATGG	GCAGCATAGTGAGCCCAGAANRG	GCAGCATAGTGAGCCCAGAANRG				0	0	0	0	45.51	0	0	0	GACGGGGGCATAGTGGGCCAGAATGGTCT	0.0874723	0
RNA	1	chr5	33479846	+	3	GCAGCCTCCTGAGCC-AGAATAG	GCAGCCTCCTGAGCCAGAATAG	GCAGCATAGTGAGCCCAGAANRG	GCAGCATAGTGAGCCCAGAANRG				0	0	0	0	44.76	0	0	0	AGGGCAGCCTCCTGAGCCAGAATAGGTTC	0.144687	0
RNA	1	chr5	33479846	+	3	GCAGCCTCCTGAGC-CAGAATAG	GCAGCCTCCTGAGCCAGAATAG	GCAGCATAGTGAGCCCAGAANRG	GCAGCATAGTGAGCCCAGAANRG				0	0	0	0	45.16	0	0	0	AGGGCAGCCTCCTGAGCCAGAATAGGTTC	0.144687	0
RNA	1	chr5	33479846	+	3	GCAGCCTCCTGAG-CCAGAATAG	GCAGCCTCCTGAGCCAGAATAG	GCAGCATAGTGAGCCCAGAANRG	GCAGCATAGTGAGCCCAGAANRG				0	0	0	0	45.76	0	0	0	AGGGCAGCCTCCTGAGCCAGAATAGGTTC	0.144687	0
RNA	1	chr5	63962646	+	3	GAAGCATAGGGAG-CCTGAATGG	GAAGCATAGGGAGCCTGAATGG	GCAGCATAGTGAGCCCAGAANRG	GCAGCATAGTGAGCCCAGAANRG				0	0	0	0	42.96	0	0	0	AAGGAAGCATAGGGAGCCTGAATGGGAAG	0.100031	0
RNA	1	chr5	30753714	-	3	ACATCAT-GTGAGGCCAGAAGAG	ACATCATGTGAGGCCAGAAGAG	GCAGCATAGTGAGCCCAGAANRG	GCAGCATAGTGAGCCCAGAANRG				0	0	0	0	46.03	0	0	0	GGATACATCATGTGAGGCCAGAAGAGCCA	0.0677738	0
RNA	1	chr5	110140526	-	3	CCAGCAT-GTGAGCTAAGAACGG	CCAGCATGTGAGCTAAGAACGG	GCAGCATAGTGAGCCCAGAANRG	GCAGCATAGTGAGCCCAGAANRG				0	0	0	0	43.3	0	0	0	TTTCCCAGCATGTGAGCTAAGAACGGTCT	0.0984337	0
DNA	1	chr5	9176441	+	3	GCAGCCTAGTGAAACCCTGAACGG	GCAGCCTAGTGAAACCCTGAACGG	GCAGCATAGTG-AGCCCAGAANRG	GCAGCATAGTGAGCCCAGAANRG				0	0	0	0	41.39	0	0	0	ATTGCAGCCTAGTGAAACCCTGAACGGAG	0.100359	0
RNA	1	chr5	76180743	-	3	ACAGCAT-GAGAGCTCAGAAAAG	ACAGCATGAGAGCTCAGAAAAG	GCAGCATAGTGAGCCCAGAANRG	GCAGCATAGTGAGCCCAGAANRG				0	0	0	0	45.1	0	0	0	GTCCACAGCATGAGAGCTCAGAAAAGACC	0.074232	0
RNA	1	chr5	178223666	-	3	GCAGCCT-GTGGGGCCAGAAAGG	GCAGCCTGTGGGGCCAGAAAGG	GCAGCATAGTGAGCCCAGAANRG	GCAGCATAGTGAGCCCAGAANRG				0	0	0	0	45.31	0	0	0	AAAGGCAGCCTGTGGGGCCAGAAAGGTTA	0.100455	0
RNA	1	chr5	162841172	+	3	GCACGAT-GTGAGCCCAGCAGGG	GCACGATGTGAGCCCAGCAGGG	GCAGCATAGTGAGCCCAGAANRG	GCAGCATAGTGAGCCCAGAANRG				0	0	0	0	42.26	0	0	0	CCAGCACGATGTGAGCCCAGCAGGGTGAG	0.124397	0
RNA	1	chr5	149261710	-	3	GCAGAAT-GAGAGCTCAGAAGAG	GCAGAATGAGAGCTCAGAAGAG	GCAGCATAGTGAGCCCAGAANRG	GCAGCATAGTGAGCCCAGAANRG				0	0	0	0	45.03	0	0	0	AATCGCAGAATGAGAGCTCAGAAGAGGAG	0.0598145	0
RNA	1	chr5	149241211	-	3	GCAACCT-CTGAGCCCAGAACAG	GCAACCTCTGAGCCCAGAACAG	GCAGCATAGTGAGCCCAGAANRG	GCAGCATAGTGAGCCCAGAANRG				0	0	0	0	46.89	0	0	0	AGTTGCAACCTCTGAGCCCAGAACAGTGC	0.0692833	0
RNA	1	chr5	136814884	-	2	GCAGCAT-GTGCTCCCAGAAGAG	GCAGCATGTGCTCCCAGAAGAG	GCAGCATAGTGAGCCCAGAANRG	GCAGCATAGTGAGCCCAGAANRG				0	0	0	0	45.72	0	0	0	CCCTGCAGCATGTGCTCCCAGAAGAGACT	0.258563	0
RNA	1	chr5	63962646	+	3	GAAGCATAGGGAGCCT-GAATGG	GAAGCATAGGGAGCCTGAATGG	GCAGCATAGTGAGCCCAGAANRG	GCAGCATAGTGAGCCCAGAANRG				0	0	0	0	41.96	0	0	0	AAGGAAGCATAGGGAGCCTGAATGGGAAG	0.100031	0
RNA	1	chr5	159797840	+	3	TCAGCAAAGGGAGCCC-GAATGG	TCAGCAAAGGGAGCCCGAATGG	GCAGCATAGTGAGCCCAGAANRG	GCAGCATAGTGAGCCCAGAANRG				0	0	0	0	44.04	0	0	0	TCCTCAGCAAAGGGAGCCCGAATGGGAGA	0.129507	0
RNA	1	chr5	173553885	-	3	GCAGCAAAGTGAGCTC-TAAAAG	GCAGCAAAGTGAGCTCTAAAAG	GCAGCATAGTGAGCCCAGAANRG	GCAGCATAGTGAGCCCAGAANRG				0	0	0	0	38.76	0	0	0	TGAGGCAGCAAAGTGAGCTCTAAAAGAGC	0.0715354	0
DNA	1	chr5	142834565	-	2	GCTGCACAAGTGAGCCCAGAAGAG	GCTGCACAAGTGAGCCCAGAAGAG	GCAGCATA-GTGAGCCCAGAANRG	GCAGCATAGTGAGCCCAGAANRG				0	0	0	0	46.97	0	0	0	TAGCTGCACAAGTGAGCCCAGAAGAGGAC	0.3335	0
RNA	1	chr5	165921705	-	3	GCAGGACAGTG-GCCCAGTAGGG	GCAGGACAGTGGCCCAGTAGGG	GCAGCATAGTGAGCCCAGAANRG	GCAGCATAGTGAGCCCAGAANRG				0	0	0	0	41.67	0	0	0	AATTGCAGGACAGTGGCCCAGTAGGGCCT	0.105694	0
RNA	1	chr5	153911620	+	3	TCAGAACAGTG-GCCCAGAAAAG	TCAGAACAGTGGCCCAGAAAAG	GCAGCATAGTGAGCCCAGAANRG	GCAGCATAGTGAGCCCAGAANRG				0	0	0	0	46.55	0	0	0	AAATCAGAACAGTGGCCCAGAAAAGACAA	0.133128	0
RNA	1	chr5	40102172	-	3	GGGGCATAGTG-GGCCAGAATGG	GGGGCATAGTGGGCCAGAATGG	GCAGCATAGTGAGCCCAGAANRG	GCAGCATAGTGAGCCCAGAANRG				0	0	0	0	45.51	0	0	0	GACGGGGGCATAGTGGGCCAGAATGGTCT	0.0874723	0
RNA	1	chr5	34482168	+	3	GCAGCAGAGTG-GCACAGCAGAG	GCAGCAGAGTGGCACAGCAGAG	GCAGCATAGTGAGCCCAGAANRG	GCAGCATAGTGAGCCCAGAANRG				0	0	0	0	39.96	0	0	0	AGAGCAGCAGAGTGGCACAGCAGAGAAGG	0.128689	0
RNA	1	chr5	93209971	+	3	CCAGCATAGTG-GCCCTCAAAGG	CCAGCATAGTGGCCCTCAAAGG	GCAGCATAGTGAGCCCAGAANRG	GCAGCATAGTGAGCCCAGAANRG				0	0	0	0	39.97	0	0	0	CAGCCAGCATAGTGGCCCTCAAAGGTTAG	0.144615	0
RNA	1	chr1	112034845	+	3	GCAGAATAGTAAA-CCAGAAAGG	GCAGAATAGTAAACCAGAAAGG	GCAGCATAGTGAGCCCAGAANRG	GCAGCATAGTGAGCCCAGAANRG				0	0	0	0	44.6	0	0	0	GTAGCAGAATAGTAAACCAGAAAGGGACC	0.164619	0
DNA	1	chr16	67398452	+	3	GCCACCATAGTGAGCCCATACTAG	GCCACCATAGTGAGCCCATACTAG	GC-AGCATAGTGAGCCCAGAANRG	GCAGCATAGTGAGCCCAGAANRG				0	0	0	0	42.36	0	0	0	CTGGCCACCATAGTGAGCCCATACTAGGC	0.102178	0
DNA	1	chr16	9283801	-	3	GGAAGCATGGTGAGCCCAGCACAG	GGAAGCATGGTGAGCCCAGCACAG	GC-AGCATAGTGAGCCCAGAANRG	GCAGCATAGTGAGCCCAGAANRG				0	0	0	0	41.07	0	0	0	TAGGAAGCATGGTGAGCCCAGCACAGTGA	0.358308	0
DNA	1	chr16	76077694	-	3	GCAGAATAGACAGCCCAGAAATAG	GCAGAATAGACAGCCCAGAAATAG	GCAGCATAGTGAGCCCAGA-ANRG	GCAGCATAGTGAGCCCAGAANRG				0	0	0	0	40.31	0	0	0	GAGCAGAATAGACAGCCCAGAAATAGGCC	0.110831	0
DNA	1	chr16	56723041	-	3	ACAGAATAGAGAGCCCAGAGACAG	ACAGAATAGAGAGCCCAGAGACAG	GCAGCATAGTGAGCCCAGA-ANRG	GCAGCATAGTGAGCCCAGAANRG				0	0	0	0	40.89	0	0	0	AAACAGAATAGAGAGCCCAGAGACAGACC	0.136013	0
DNA	1	chr16	49925549	+	3	ACAGAATAGAGAGCCCAGAAATAG	ACAGAATAGAGAGCCCAGAAATAG	GCAGCATAGTGAGCCCAGA-ANRG	GCAGCATAGTGAGCCCAGAANRG				0	0	0	0	40.89	0	0	0	GGAACAGAATAGAGAGCCCAGAAATAGAC	0.453381	0
DNA	1	chr16	27086600	-	3	GAAGCAGAAATGAGCCCAGAAAGG	GAAGCAGAAATGAGCCCAGAAAGG	GCAGCA-TAGTGAGCCCAGAANRG	GCAGCATAGTGAGCCCAGAANRG				0	0	0	0	46.57	0	0	0	GGGAAGCAGAAATGAGCCCAGAAAGGCCA	0.202454	0
DNA	1	chr16	24699302	+	3	GCAGCACTACAGAGCACAGAAGAG	GCAGCACTACAGAGCACAGAAGAG	GCAGCA-TAGTGAGCCCAGAANRG	GCAGCATAGTGAGCCCAGAANRG				0	0	0	0	43.97	0	0	0	TGGGCAGCACTACAGAGCACAGAAGAGAG	0.131033	0
DNA	1	chr16	86977391	+	3	GCGGACATGGTCAGCCCAGAATGG	GCGGACATGGTCAGCCCAGAATGG	GCAG-CATAGTGAGCCCAGAANRG	GCAGCATAGTGAGCCCAGAANRG				0	0	0	0	46.21	0	0	0	GATGCGGACATGGTCAGCCCAGAATGGTG	0.135446	0
DNA	1	chr16	77827486	-	3	GTAGCATCTGTAAGCCCAGAATAG	GTAGCATCTGTAAGCCCAGAATAG	GCAGCAT-AGTGAGCCCAGAANRG	GCAGCATAGTGAGCCCAGAANRG				0	0	0	0	46.15	0	0	0	CGGTAGCATCTGTAAGCCCAGAATAGAGC	0.150634	0
DNA	1	chr16	27086600	-	3	GAAGCAGAAATGAGCCCAGAAAGG	GAAGCAGAAATGAGCCCAGAAAGG	GCAGCAT-AGTGAGCCCAGAANRG	GCAGCATAGTGAGCCCAGAANRG				0	0	0	0	46.57	0	0	0	GGGAAGCAGAAATGAGCCCAGAAAGGCCA	0.202454	0
DNA	1	chr16	2804882	-	3	GCAGCATGGGTGAGCCCAGGCTGG	GCAGCATGGGTGAGCCCAGGCTGG	GCAGCAT-AGTGAGCCCAGAANRG	GCAGCATAGTGAGCCCAGAANRG				0	0	0	0	41.08	0	0	0	GAGCAGCATGGGTGAGCCCAGGCTGGGGC	0.251771	0
DNA	1	chr16	1002297	-	3	GGAGCCTCAGGGAGCCCAGAAGGG	GGAGCCTCAGGGAGCCCAGAAGGG	GCAGCAT-AGTGAGCCCAGAANRG	GCAGCATAGTGAGCCCAGAANRG				0	0	0	0	46.39	0	0	0	GTGGAGCCTCAGGGAGCCCAGAAGGGGGC	0.186855	0
DNA	1	chr16	85497208	-	3	GCAGCTTCAGTGGGACCAGAAAGG	GCAGCTTCAGTGGGACCAGAAAGG	GCAGCAT-AGTGAGCCCAGAANRG	GCAGCATAGTGAGCCCAGAANRG				0	0	0	0	44.22	0	0	0	CAGCAGCTTCAGTGGGACCAGAAAGGCCC	0.167414	0
RNA	1	chr16	86977393	+	3	GGA-CATGGTCAGCCCAGAATGG	GGACATGGTCAGCCCAGAATGG	GCAGCATAGTGAGCCCAGAANRG	GCAGCATAGTGAGCCCAGAANRG				0	0	0	0	46.62	0	0	0	TGCGGACATGGTCAGCCCAGAATGGTGGG	0.142696	0
RNA	1	chr16	86563376	+	3	GCA-CCTCGTGACCCCAGAAAAG	GCACCTCGTGACCCCAGAAAAG	GCAGCATAGTGAGCCCAGAANRG	GCAGCATAGTGAGCCCAGAANRG				0	0	0	0	46.14	0	0	0	AAGGCACCTCGTGACCCCAGAAAAGAAAT	0.138833	0
RNA	1	chr16	61364314	+	3	GCA-CATACTGAGACCAGAGAAG	GCACATACTGAGACCAGAGAAG	GCAGCATAGTGAGCCCAGAANRG	GCAGCATAGTGAGCCCAGAANRG				0	0	0	0	40.07	0	0	0	AAGGCACATACTGAGACCAGAGAAGTAGG	0.162128	0
RNA	1	chr16	57269329	-	3	CCA-CACAGTGAGCCCACAAAGG	CCACACAGTGAGCCCACAAAGG	GCAGCATAGTGAGCCCAGAANRG	GCAGCATAGTGAGCCCAGAANRG				0	0	0	0	43.37	0	0	0	AAGGCCACACAGTGAGCCCACAAAGGTCT	0.36693	0
RNA	1	chr16	33908620	+	3	TCA-CATACTCAGCCCAGAAAAG	TCACATACTCAGCCCAGAAAAG	GCAGCATAGTGAGCCCAGAANRG	GCAGCATAGTGAGCCCAGAANRG				0	0	0	0	46.55	0	0	0	GTGTCACATACTCAGCCCAGAAAAGGAAA	0.124508	0
RNA	1	chr16	32945168	-	3	TCA-CATACTCAGCCCAGAAAAG	TCACATACTCAGCCCAGAAAAG	GCAGCATAGTGAGCCCAGAANRG	GCAGCATAGTGAGCCCAGAANRG				0	0	0	0	46.55	0	0	0	GGTGTCACATACTCAGCCCAGAAAAGGAA	0.0378705	0
RNA	1	chr16	24291184	+	3	GCA-CATAGTTAGCCCTCAATAG	GCACATAGTTAGCCCTCAATAG	GCAGCATAGTGAGCCCAGAANRG	GCAGCATAGTGAGCCCAGAANRG				0	0	0	0	40.02	0	0	0	TTGGCACATAGTTAGCCCTCAATAGCCAC	0.134378	0
RNA	1	chr16	12940443	-	3	GCA-CATAGTGAGGTGAGAAGAG	GCACATAGTGAGGTGAGAAGAG	GCAGCATAGTGAGCCCAGAANRG	GCAGCATAGTGAGCCCAGAANRG				0	0	0	0	42.22	0	0	0	GCAGGCACATAGTGAGGTGAGAAGAGAGA	0.108956	0
RNA	1	chr16	3773538	+	3	GCA-TATAGTTAACCCAGAAAGG	GCATATAGTTAACCCAGAAAGG	GCAGCATAGTGAGCCCAGAANRG	GCAGCATAGTGAGCCCAGAANRG				0	0	0	0	45.73	0	0	0	TTTGCATATAGTTAACCCAGAAAGGATAA	0.131051	0
RNA	1	chr16	82664462	+	3	CCAGCC-AGTGAGCCCAGCACAG	CCAGCCAGTGAGCCCAGCACAG	GCAGCATAGTGAGCCCAGAANRG	GCAGCATAGTGAGCCCAGAANRG				0	0	0	0	42.33	0	0	0	CTGCCAGCCAGTGAGCCCAGCACAGTCAG	0.147831	0
RNA	1	chr16	10895769	+	3	GAAGCA-CCTGAGCCCAGAAAAG	GAAGCACCTGAGCCCAGAAAAG	GCAGCATAGTGAGCCCAGAANRG	GCAGCATAGTGAGCCCAGAANRG				0	0	0	0	46.91	0	0	0	GAGGAAGCACCTGAGCCCAGAAAAGGACA	0.148084	0
RNA	1	chr16	7998385	+	3	GCACCA-AGAGAGCCCTGAACAG	GCACCAAGAGAGCCCTGAACAG	GCAGCATAGTGAGCCCAGAANRG	GCAGCATAGTGAGCCCAGAANRG				0	0	0	0	43.99	0	0	0	AAGGCACCAAGAGAGCCCTGAACAGCTTA	0.133857	0
RNA	1	chr16	999335	-	3	GCAGCA-TGTGAGCCGAGAGAGG	GCAGCATGTGAGCCGAGAGAGG	GCAGCATAGTGAGCCCAGAANRG	GCAGCATAGTGAGCCCAGAANRG				0	0	0	0	39.09	0	0	0	GGAGGCAGCATGTGAGCCGAGAGAGGCAT	0.279857	0
RNA	1	chr16	80372466	+	3	CCAGCA-AATGAGCTCAGAAAGG	CCAGCAAATGAGCTCAGAAAGG	GCAGCATAGTGAGCCCAGAANRG	GCAGCATAGTGAGCCCAGAANRG				0	0	0	0	45.29	0	0	0	AAACCAGCAAATGAGCTCAGAAAGGCAGG	0.151957	0
DNA	1	chr16	85353085	-	3	GCAGCCTAGTGAGGCCCAGAGCAG	GCAGCCTAGTGAGGCCCAGAGCAG	GCAGCATAGTG-AGCCCAGAANRG	GCAGCATAGTGAGCCCAGAANRG				0	0	0	0	45.59	0	0	0	CTGCAGCCTAGTGAGGCCCAGAGCAGAGG	0.347618	0
RNA	1	chr16	67759540	+	3	GAAGCATAGTGGGCCCTG-ATGG	GAAGCATAGTGGGCCCTGATGG	GCAGCATAGTGAGCCCAGAANRG	GCAGCATAGTGAGCCCAGAANRG				0	0	0	0	38.96	0	0	0	CCAGAAGCATAGTGGGCCCTGATGGCTCA	0.238385	0
RNA	1	chr16	57741809	+	3	GCATCATGGTGAGCCCCG-ACAG	GCATCATGGTGAGCCCCGACAG	GCAGCATAGTGAGCCCAGAANRG	GCAGCATAGTGAGCCCAGAANRG				0	0	0	0	39.45	0	0	0	ACTGCATCATGGTGAGCCCCGACAGCTGG	0.269512	0
RNA	1	chr16	56520797	-	3	GCAGCAGAGTGAGCCCCG-GGGG	GCAGCAGAGTGAGCCCCGGGGG	GCAGCATAGTGAGCCCAGAANRG	GCAGCATAGTGAGCCCAGAANRG				0	0	0	0	33.66	0	0	0	GAAGGCAGCAGAGTGAGCCCCGGGGGCCT	0.126721	0
RNA	1	chr16	53702485	-	3	GAAGCATAGTGAGCAAAG-AAGG	GAAGCATAGTGAGCAAAGAAGG	GCAGCATAGTGAGCCCAGAANRG	GCAGCATAGTGAGCCCAGAANRG				0	0	0	0	38.56	0	0	0	AAGTGAAGCATAGTGAGCAAAGAAGGATA	0.115928	0
DNA	1	chr16	85098647	-	3	GCACCATATGGAGCCCAGGAAAAG	GCACCATATGGAGCCCAGGAAAAG	GCAGCATAGTGAGCCCA-GAANRG	GCAGCATAGTGAGCCCAGAANRG				0	0	0	0	42.68	0	0	0	GAGCACCATATGGAGCCCAGGAAAAGAAG	0.108209	0
DNA	1	chr16	84639803	-	3	GCAACATTCTGAGCCCATGAAGAG	GCAACATTCTGAGCCCATGAAGAG	GCAGCATAGTGAGCCCA-GAANRG	GCAGCATAGTGAGCCCAGAANRG				0	0	0	0	42.91	0	0	0	AAGCAACATTCTGAGCCCATGAAGAGCCC	0.118126	0
DNA	1	chr16	15892573	+	3	GCTGCACAGAGAGCCCAAGAAAAG	GCTGCACAGAGAGCCCAAGAAAAG	GCAGCATAGTGAGCCCA-GAANRG	GCAGCATAGTGAGCCCAGAANRG				0	0	0	0	42.82	0	0	0	AATGCTGCACAGAGAGCCCAAGAAAAGTC	0.0648529	0
RNA	1	chr16	72314015	+	3	CTAGCATAGTGAACCCAG-AGAG	CTAGCATAGTGAACCCAGAGAG	GCAGCATAGTGAGCCCAGAANRG	GCAGCATAGTGAGCCCAGAANRG				0	0	0	0	41.54	0	0	0	AATCTAGCATAGTGAACCCAGAGAGACAG	0.358791	0
RNA	1	chr16	76929587	-	3	GCTGCAGAGTGAGCCCAC-ATGG	GCTGCAGAGTGAGCCCACATGG	GCAGCATAGTGAGCCCAGAANRG	GCAGCATAGTGAGCCCAGAANRG				0	0	0	0	38.51	0	0	0	ACATGCTGCAGAGTGAGCCCACATGGTAT	0.0894305	0
RNA	1	chr16	89078332	+	3	GCAGCAGGATGAGCCCAG-AGGG	GCAGCAGGATGAGCCCAGAGGG	GCAGCATAGTGAGCCCAGAANRG	GCAGCATAGTGAGCCCAGAANRG				0	0	0	0	42.04	0	0	0	CCCGCAGCAGGATGAGCCCAGAGGGTGAG	0.444543	0
DNA	1	chr16	85353085	-	3	GCAGCCTAGTGAGGCCCAGAGCAG	GCAGCCTAGTGAGGCCCAGAGCAG	GCAGCATAGTGAGCCC-AGAANRG	GCAGCATAGTGAGCCCAGAANRG				0	0	0	0	43.19	0	0	0	CTGCAGCCTAGTGAGGCCCAGAGCAGAGG	0.347618	0
DNA	1	chr16	15892573	+	3	GCTGCACAGAGAGCCCAAGAAAAG	GCTGCACAGAGAGCCCAAGAAAAG	GCAGCATAGTGAGCCC-AGAANRG	GCAGCATAGTGAGCCCAGAANRG				0	0	0	0	43.82	0	0	0	AATGCTGCACAGAGAGCCCAAGAAAAGTC	0.0648529	0
RNA	1	chr16	78794347	-	3	GCAGCTTCCTGAGCC-AGAACAG	GCAGCTTCCTGAGCCAGAACAG	GCAGCATAGTGAGCCCAGAANRG	GCAGCATAGTGAGCCCAGAANRG				0	0	0	0	44.76	0	0	0	TAAGGCAGCTTCCTGAGCCAGAACAGACC	0.0602343	0
RNA	1	chr16	78794347	-	3	GCAGCTTCCTGAGC-CAGAACAG	GCAGCTTCCTGAGCCAGAACAG	GCAGCATAGTGAGCCCAGAANRG	GCAGCATAGTGAGCCCAGAANRG				0	0	0	0	45.16	0	0	0	TAAGGCAGCTTCCTGAGCCAGAACAGACC	0.0602343	0
RNA	1	chr16	78794347	-	3	GCAGCTTCCTGAG-CCAGAACAG	GCAGCTTCCTGAGCCAGAACAG	GCAGCATAGTGAGCCCAGAANRG	GCAGCATAGTGAGCCCAGAANRG				0	0	0	0	45.76	0	0	0	TAAGGCAGCTTCCTGAGCCAGAACAGACC	0.0602343	0
RNA	1	chr16	58473970	-	3	GGAGCAGAGTGAGCC-AGGAGGG	GGAGCAGAGTGAGCCAGGAGGG	GCAGCATAGTGAGCCCAGAANRG	GCAGCATAGTGAGCCCAGAANRG				0	0	0	0	40.23	0	0	0	GGCTGGAGCAGAGTGAGCCAGGAGGGGAG	0.108822	0
RNA	1	chr16	58473970	-	3	GGAGCAGAGTGAGC-CAGGAGGG	GGAGCAGAGTGAGCCAGGAGGG	GCAGCATAGTGAGCCCAGAANRG	GCAGCATAGTGAGCCCAGAANRG				0	0	0	0	40.63	0	0	0	GGCTGGAGCAGAGTGAGCCAGGAGGGGAG	0.108822	0
RNA	1	chr16	58473970	-	3	GGAGCAGAGTGAG-CCAGGAGGG	GGAGCAGAGTGAGCCAGGAGGG	GCAGCATAGTGAGCCCAGAANRG	GCAGCATAGTGAGCCCAGAANRG				0	0	0	0	41.23	0	0	0	GGCTGGAGCAGAGTGAGCCAGGAGGGGAG	0.108822	0
RNA	1	chr16	87959313	-	3	GCAGCCT-GTGAGCCAGGAATGG	GCAGCCTGTGAGCCAGGAATGG	GCAGCATAGTGAGCCCAGAANRG	GCAGCATAGTGAGCCCAGAANRG				0	0	0	0	42.11	0	0	0	CTATGCAGCCTGTGAGCCAGGAATGGGTT	0.0921708	0
RNA	1	chr16	55555689	-	3	GCTGCAT-GCAAGCCCAGAAGAG	GCTGCATGCAAGCCCAGAAGAG	GCAGCATAGTGAGCCCAGAANRG	GCAGCATAGTGAGCCCAGAANRG				0	0	0	0	46.27	0	0	0	GTATGCTGCATGCAAGCCCAGAAGAGAAG	0.093184	0
RNA	1	chr16	16010881	+	3	GCAGCTT-CTGAGCCCTGAACAG	GCAGCTTCTGAGCCCTGAACAG	GCAGCATAGTGAGCCCAGAANRG	GCAGCATAGTGAGCCCAGAANRG				0	0	0	0	44.06	0	0	0	CCTGCAGCTTCTGAGCCCTGAACAGAGAG	0.117725	0
RNA	1	chr16	15488321	-	3	GCAGCCT-GTGAGACAAGAATGG	GCAGCCTGTGAGACAAGAATGG	GCAGCATAGTGAGCCCAGAANRG	GCAGCATAGTGAGCCCAGAANRG				0	0	0	0	43.81	0	0	0	TTGTGCAGCCTGTGAGACAAGAATGGCTT	0.0706845	0
RNA	1	chr16	11671456	-	3	GCAGGAT-GGGAGCCCAGAGGGG	GCAGGATGGGAGCCCAGAGGGG	GCAGCATAGTGAGCCCAGAANRG	GCAGCATAGTGAGCCCAGAANRG				0	0	0	0	40.93	0	0	0	GAAGGCAGGATGGGAGCCCAGAGGGGAGC	0.123548	0
RNA	1	chr16	10895769	+	3	GAAGCAC-CTGAGCCCAGAAAAG	GAAGCACCTGAGCCCAGAAAAG	GCAGCATAGTGAGCCCAGAANRG	GCAGCATAGTGAGCCCAGAANRG				0	0	0	0	46.91	0	0	0	GAGGAAGCACCTGAGCCCAGAAAAGGACA	0.148084	0
RNA	1	chr16	2976525	+	3	GGAGCCT-GTGAGCCCAGCAGGG	GGAGCCTGTGAGCCCAGCAGGG	GCAGCATAGTGAGCCCAGAANRG	GCAGCATAGTGAGCCCAGAANRG				0	0	0	0	42.28	0	0	0	GAGGGAGCCTGTGAGCCCAGCAGGGACAG	0.11635	0
RNA	1	chr16	999335	-	2	GCAGCAT-GTGAGCCGAGAGAGG	GCAGCATGTGAGCCGAGAGAGG	GCAGCATAGTGAGCCCAGAANRG	GCAGCATAGTGAGCCCAGAANRG				0	0	0	0	39.32	0	0	0	GGAGGCAGCATGTGAGCCGAGAGAGGCAT	0.279857	0
RNA	1	chr16	67410217	+	3	GCACCACAGTG-GCCCAGCAGGG	GCACCACAGTGGCCCAGCAGGG	GCAGCATAGTGAGCCCAGAANRG	GCAGCATAGTGAGCCCAGAANRG				0	0	0	0	41.69	0	0	0	GCGGCACCACAGTGGCCCAGCAGGGAGCC	0.151765	0
DNA	1	chr16	77827486	-	3	GTAGCATCTGTAAGCCCAGAATAG	GTAGCATCTGTAAGCCCAGAATAG	GCAGCATA-GTGAGCCCAGAANRG	GCAGCATAGTGAGCCCAGAANRG				0	0	0	0	46.15	0	0	0	CGGTAGCATCTGTAAGCCCAGAATAGAGC	0.150634	0
DNA	1	chr16	27086600	-	3	GAAGCAGAAATGAGCCCAGAAAGG	GAAGCAGAAATGAGCCCAGAAAGG	GCAGCATA-GTGAGCCCAGAANRG	GCAGCATAGTGAGCCCAGAANRG				0	0	0	0	46.49	0	0	0	GGGAAGCAGAAATGAGCCCAGAAAGGCCA	0.202454	0
DNA	1	chr16	2804882	-	3	GCAGCATGGGTGAGCCCAGGCTGG	GCAGCATGGGTGAGCCCAGGCTGG	GCAGCATA-GTGAGCCCAGAANRG	GCAGCATAGTGAGCCCAGAANRG				0	0	0	0	41.08	0	0	0	GAGCAGCATGGGTGAGCCCAGGCTGGGGC	0.251771	0
DNA	1	chr16	85353085	-	2	GCAGCCTAGTGAGGCCCAGAGCAG	GCAGCCTAGTGAGGCCCAGAGCAG	GCAGCATAGTGAG-CCCAGAANRG	GCAGCATAGTGAGCCCAGAANRG				0	0	0	0	46.19	0	0	0	CTGCAGCCTAGTGAGGCCCAGAGCAGAGG	0.347618	0
DNA	1	chr16	60814112	-	3	GCAGCATAGGGAGACTCAGATCAG	GCAGCATAGGGAGACTCAGATCAG	GCAGCATAGTGAG-CCCAGAANRG	GCAGCATAGTGAGCCCAGAANRG				0	0	0	0	43.6	0	0	0	GGGCAGCATAGGGAGACTCAGATCAGAAA	0.12917	0
DNA	1	chr16	57574978	-	3	GCAGCACGGTGAGGCCCAGCACAG	GCAGCACGGTGAGGCCCAGCACAG	GCAGCATAGTGAG-CCCAGAANRG	GCAGCATAGTGAGCCCAGAANRG				0	0	0	0	39.9	0	0	0	CAGCAGCACGGTGAGGCCCAGCACAGTGA	0.17616	0
DNA	1	chr16	8898104	+	3	GCATCACAGTGGGACCCAGAAGGG	GCATCACAGTGGGACCCAGAAGGG	GCAGCATAGTGAG-CCCAGAANRG	GCAGCATAGTGAGCCCAGAANRG				0	0	0	0	45.2	0	0	0	CAAGCATCACAGTGGGACCCAGAAGGGAA	0.167255	0
DNA	1	chr16	8600974	+	3	GAAGAAAAGTGAGACCCAGAAAAG	GAAGAAAAGTGAGACCCAGAAAAG	GCAGCATAGTGAG-CCCAGAANRG	GCAGCATAGTGAGCCCAGAANRG				0	0	0	0	45.85	0	0	0	AGAGAAGAAAAGTGAGACCCAGAAAAGAA	0.103715	0
RNA	1	chr16	999335	-	3	GCAGCATG-TGAGCCGAGAGAGG	GCAGCATGTGAGCCGAGAGAGG	GCAGCATAGTGAGCCCAGAANRG	GCAGCATAGTGAGCCCAGAANRG				0	0	0	0	38.97	0	0	0	GGAGGCAGCATGTGAGCCGAGAGAGGCAT	0.279857	0
RNA	1	chr16	10895769	+	3	GAAGCACC-TGAGCCCAGAAAAG	GAAGCACCTGAGCCCAGAAAAG	GCAGCATAGTGAGCCCAGAANRG	GCAGCATAGTGAGCCCAGAANRG				0	0	0	0	46.91	0	0	0	GAGGAAGCACCTGAGCCCAGAAAAGGACA	0.148084	0
RNA	1	chr16	80372466	+	3	CCAGCAAA-TGAGCTCAGAAAGG	CCAGCAAATGAGCTCAGAAAGG	GCAGCATAGTGAGCCCAGAANRG	GCAGCATAGTGAGCCCAGAANRG				0	0	0	0	45.29	0	0	0	AAACCAGCAAATGAGCTCAGAAAGGCAGG	0.151957	0
RNA	1	chr16	16010881	+	3	GCAGCTTC-TGAGCCCTGAACAG	GCAGCTTCTGAGCCCTGAACAG	GCAGCATAGTGAGCCCAGAANRG	GCAGCATAGTGAGCCCAGAANRG				0	0	0	0	44.06	0	0	0	CCTGCAGCTTCTGAGCCCTGAACAGAGAG	0.117725	0
DNA	1	chr5	37836595	+	3	CCATGCAAAATGAGCCCAGAAAGG	CCATGCAAAATGAGCCCAGAAAGG	GCA-GCATAGTGAGCCCAGAANRG	GCAGCATAGTGAGCCCAGAANRG				0	0	0	0	46.64	0	0	0	AGGCCATGCAAAATGAGCCCAGAAAGGTA	0.0919087	0
DNA	1	chr5	134492318	-	3	TTCAGAAGAGTGAGCCCAGAAAAG	TTCAGAAGAGTGAGCCCAGAAAAG	G-CAGCATAGTGAGCCCAGAANRG	GCAGCATAGTGAGCCCAGAANRG				0	0	0	0	46.97	0	0	0	GCTTCAGAAGAGTGAGCCCAGAAAAGGTG	0.334207	0
DNA	1	chr5	88115215	-	3	GGCGGCTTAGTGAACCCAGAATAG	GGCGGCTTAGTGAACCCAGAATAG	G-CAGCATAGTGAGCCCAGAANRG	GCAGCATAGTGAGCCCAGAANRG				0	0	0	0	45.87	0	0	0	TTGGCGGCTTAGTGAACCCAGAATAGAAC	0.400585	0
DNA	1	chr5	67914757	+	3	GCAGCCAAGTGAGGCCCAGGAAGG	GCAGCCAAGTGAGGCCCAGGAAGG	GCAGCATAGTGA-GCCCAGAANRG	GCAGCATAGTGAGCCCAGAANRG				0	0	0	0	40.16	0	0	0	AATGCAGCCAAGTGAGGCCCAGGAAGGCT	0.111274	0
DNA	1	chr5	9176441	+	3	GCAGCCTAGTGAAACCCTGAACGG	GCAGCCTAGTGAAACCCTGAACGG	GCAGCATAGTGA-GCCCAGAANRG	GCAGCATAGTGAGCCCAGAANRG				0	0	0	0	41.09	0	0	0	ATTGCAGCCTAGTGAAACCCTGAACGGAG	0.100359	0
RNA	1	chr16	70737954	-	3	GCAG-ATCTTGAGCCCACAACGG	GCAGATCTTGAGCCCACAACGG	GCAGCATAGTGAGCCCAGAANRG	GCAGCATAGTGAGCCCAGAANRG				0	0	0	0	43.08	0	0	0	GGCAGCAGATCTTGAGCCCACAACGGGCT	0.102831	0
RNA	1	chr16	28256089	-	3	GCGG-AGAATGAGCCCAGAAAGG	GCGGAGAATGAGCCCAGAAAGG	GCAGCATAGTGAGCCCAGAANRG	GCAGCATAGTGAGCCCAGAANRG				0	0	0	0	46.97	0	0	0	AGAGGCGGAGAATGAGCCCAGAAAGGGGC	0.0683299	0
RNA	1	chr16	3773538	+	3	GCAT-ATAGTTAACCCAGAAAGG	GCATATAGTTAACCCAGAAAGG	GCAGCATAGTGAGCCCAGAANRG	GCAGCATAGTGAGCCCAGAANRG				0	0	0	0	45.73	0	0	0	TTTGCATATAGTTAACCCAGAAAGGATAA	0.131051	0
RNA	1	chr16	5891102	+	3	GCAG-ATAGTAGGCCCAGCACAG	GCAGATAGTAGGCCCAGCACAG	GCAGCATAGTGAGCCCAGAANRG	GCAGCATAGTGAGCCCAGAANRG				0	0	0	0	41.2	0	0	0	TAGGCAGATAGTAGGCCCAGCACAGAAGT	0.15268	0
RNA	1	chr16	86563376	+	3	GCACC-TCGTGACCCCAGAAAAG	GCACCTCGTGACCCCAGAAAAG	GCAGCATAGTGAGCCCAGAANRG	GCAGCATAGTGAGCCCAGAANRG				0	0	0	0	46.14	0	0	0	AAGGCACCTCGTGACCCCAGAAAAGAAAT	0.138833	0
DNA	1	chr16	85098647	-	3	GCACCATATGGAGCCCAGGAAAAG	GCACCATATGGAGCCCAGGAAAAG	GCAGCATAGTGAGCCCAG-AANRG	GCAGCATAGTGAGCCCAGAANRG				0	0	0	0	41.68	0	0	0	GAGCACCATATGGAGCCCAGGAAAAGAAG	0.108209	0
DNA	1	chr16	76077694	-	3	GCAGAATAGACAGCCCAGAAATAG	GCAGAATAGACAGCCCAGAAATAG	GCAGCATAGTGAGCCCAG-AANRG	GCAGCATAGTGAGCCCAGAANRG				0	0	0	0	41.31	0	0	0	GAGCAGAATAGACAGCCCAGAAATAGGCC	0.110831	0
DNA	1	chr16	49925549	+	3	ACAGAATAGAGAGCCCAGAAATAG	ACAGAATAGAGAGCCCAGAAATAG	GCAGCATAGTGAGCCCAG-AANRG	GCAGCATAGTGAGCCCAGAANRG				0	0	0	0	41.89	0	0	0	GGAACAGAATAGAGAGCCCAGAAATAGAC	0.453381	0
RNA	1	chr16	77567193	-	3	GCAGAACAGTGAGCCCA-ATAGG	GCAGAACAGTGAGCCCAATAGG	GCAGCATAGTGAGCCCAGAANRG	GCAGCATAGTGAGCCCAGAANRG				0	0	0	0	37.47	0	0	0	GGAAGCAGAACAGTGAGCCCAATAGGATG	0.104826	0
RNA	1	chr16	76929587	-	3	GCTGCAGAGTGAGCCCA-CATGG	GCTGCAGAGTGAGCCCACATGG	GCAGCATAGTGAGCCCAGAANRG	GCAGCATAGTGAGCCCAGAANRG				0	0	0	0	38.51	0	0	0	ACATGCTGCAGAGTGAGCCCACATGGTAT	0.0894305	0
RNA	1	chr16	30960204	-	3	GCAGCGTAGTGAAGCCA-AAGAG	GCAGCGTAGTGAAGCCAAAGAG	GCAGCATAGTGAGCCCAGAANRG	GCAGCATAGTGAGCCCAGAANRG				0	0	0	0	41.28	0	0	0	AACAGCAGCGTAGTGAAGCCAAAGAGACA	0.0715404	0
DNA	1	chr16	85353085	-	3	GCAGCCTAGTGAGGCCCAGAGCAG	GCAGCCTAGTGAGGCCCAGAGCAG	GCAGCATAGTGAGC-CCAGAANRG	GCAGCATAGTGAGCCCAGAANRG				0	0	0	0	44.29	0	0	0	CTGCAGCCTAGTGAGGCCCAGAGCAGAGG	0.347618	0
RNA	1	chr16	82664462	+	3	CCAGC-CAGTGAGCCCAGCACAG	CCAGCCAGTGAGCCCAGCACAG	GCAGCATAGTGAGCCCAGAANRG	GCAGCATAGTGAGCCCAGAANRG				0	0	0	0	42.33	0	0	0	CTGCCAGCCAGTGAGCCCAGCACAGTCAG	0.147831	0
RNA	1	chr16	16010881	+	3	GCAGC-TTCTGAGCCCTGAACAG	GCAGCTTCTGAGCCCTGAACAG	GCAGCATAGTGAGCCCAGAANRG	GCAGCATAGTGAGCCCAGAANRG				0	0	0	0	44.06	0	0	0	CCTGCAGCTTCTGAGCCCTGAACAGAGAG	0.117725	0
RNA	1	chr16	65000202	-	3	G-AGCAGAGTGAGGGCAGAACAG	GAGCAGAGTGAGGGCAGAACAG	GCAGCATAGTGAGCCCAGAANRG	GCAGCATAGTGAGCCCAGAANRG				0	0	0	0	44.33	0	0	0	CACAGAGCAGAGTGAGGGCAGAACAGAAG	0.0618685	0
RNA	1	chr16	54964420	+	3	G-AGCAAACTGAGGCCAGAACGG	GAGCAAACTGAGGCCAGAACGG	GCAGCATAGTGAGCCCAGAANRG	GCAGCATAGTGAGCCCAGAANRG				0	0	0	0	45.88	0	0	0	GATGAGCAAACTGAGGCCAGAACGGTTAA	0.0990368	0
RNA	1	chr16	9283801	-	3	A-AGCATGGTGAGCCCAGCACAG	AAGCATGGTGAGCCCAGCACAG	GCAGCATAGTGAGCCCAGAANRG	GCAGCATAGTGAGCCCAGAANRG				0	0	0	0	42.37	0	0	0	TAGGAAGCATGGTGAGCCCAGCACAGTGA	0.358308	0
RNA	1	chr16	64646161	+	3	GCAGCATTGTGA-CCAATAAGAG	GCAGCATTGTGACCAATAAGAG	GCAGCATAGTGAGCCCAGAANRG	GCAGCATAGTGAGCCCAGAANRG				0	0	0	0	40.22	0	0	0	CTTGCAGCATTGTGACCAATAAGAGTTAG	0.118919	0
RNA	1	chr16	35068243	+	3	GCAGCCAAGTCA-CCCAGAAAAG	GCAGCCAAGTCACCCAGAAAAG	GCAGCATAGTGAGCCCAGAANRG	GCAGCATAGTGAGCCCAGAANRG				0	0	0	0	45.65	0	0	0	GGTGCAGCCAAGTCACCCAGAAAAGGTGG	0.137591	0
RNA	1	chr16	34343562	-	3	GCAGCCAAGTCA-CCCAGAAAAG	GCAGCCAAGTCACCCAGAAAAG	GCAGCATAGTGAGCCCAGAANRG	GCAGCATAGTGAGCCCAGAANRG				0	0	0	0	45.65	0	0	0	TGGTGCAGCCAAGTCACCCAGAAAAGGTG	0.0673654	0
RNA	1	chr16	5165362	-	3	GCAGTATTGTGA-CCCTGAATAG	GCAGTATTGTGACCCTGAATAG	GCAGCATAGTGAGCCCAGAANRG	GCAGCATAGTGAGCCCAGAANRG				0	0	0	0	43.33	0	0	0	GGTTGCAGTATTGTGACCCTGAATAGAAG	0.0410482	0
DNA	1	chr16	48836216	-	3	GCAGCCCAGCTGAGCCCAGAGCAG	GCAGCCCAGCTGAGCCCAGAGCAG	GCAGCATAG-TGAGCCCAGAANRG	GCAGCATAGTGAGCCCAGAANRG				0	0	0	0	46.76	0	0	0	GAGCAGCCCAGCTGAGCCCAGAGCAGCAG	0.201187	0
DNA	1	chr16	2804882	-	3	GCAGCATGGGTGAGCCCAGGCTGG	GCAGCATGGGTGAGCCCAGGCTGG	GCAGCATAG-TGAGCCCAGAANRG	GCAGCATAGTGAGCCCAGAANRG				0	0	0	0	40.93	0	0	0	GAGCAGCATGGGTGAGCCCAGGCTGGGGC	0.251771	0
DNA	1	chr16	27086600	-	3	GAAGCAGAAATGAGCCCAGAAAGG	GAAGCAGAAATGAGCCCAGAAAGG	GCAGCATAG-TGAGCCCAGAANRG	GCAGCATAGTGAGCCCAGAANRG				0	0	0	0	46.49	0	0	0	GGGAAGCAGAAATGAGCCCAGAAAGGCCA	0.202454	0
RNA	1	chr16	70827416	+	3	GCAGCATAG-GAGAACACAAGAG	GCAGCATAGGAGAACACAAGAG	GCAGCATAGTGAGCCCAGAANRG	GCAGCATAGTGAGCCCAGAANRG				0	0	0	0	40.19	0	0	0	GGGGCAGCATAGGAGAACACAAGAGGGGA	0.151746	0
RNA	1	chr16	28898215	-	3	GCACCCTAG-GAGACCAGAACAG	GCACCCTAGGAGACCAGAACAG	GCAGCATAGTGAGCCCAGAANRG	GCAGCATAGTGAGCCCAGAANRG				0	0	0	0	45.71	0	0	0	AGGGGCACCCTAGGAGACCAGAACAGCAT	0.0629295	0
RNA	1	chr16	11671456	-	3	GCAGGATGG-GAGCCCAGAGGGG	GCAGGATGGGAGCCCAGAGGGG	GCAGCATAGTGAGCCCAGAANRG	GCAGCATAGTGAGCCCAGAANRG				0	0	0	0	40.93	0	0	0	GAAGGCAGGATGGGAGCCCAGAGGGGAGC	0.123548	0
RNA	1	chr16	28256089	-	3	GC-GGAGAATGAGCCCAGAAAGG	GCGGAGAATGAGCCCAGAAAGG	GCAGCATAGTGAGCCCAGAANRG	GCAGCATAGTGAGCCCAGAANRG				0	0	0	0	46.97	0	0	0	AGAGGCGGAGAATGAGCCCAGAAAGGGGC	0.0683299	0
RNA	1	chr1	112034845	+	3	GCAGAATAGTAAAC-CAGAAAGG	GCAGAATAGTAAACCAGAAAGG	GCAGCATAGTGAGCCCAGAANRG	GCAGCATAGTGAGCCCAGAANRG				0	0	0	0	44	0	0	0	GTAGCAGAATAGTAAACCAGAAAGGGACC	0.164619	0
RNA	1	chr1	158447557	+	3	GCAGCATAGTGAG-GCTGGATGG	GCAGCATAGTGAGGCTGGATGG	GCAGCATAGTGAGCCCAGAANRG	GCAGCATAGTGAGCCCAGAANRG				0	0	0	0	36.69	0	0	0	ATGGCAGCATAGTGAGGCTGGATGGACTG	0.2679	0
RNA	1	chr2	211549144	-	3	CCA-CATAGGGAGCCCAGATTAG	CCACATAGGGAGCCCAGATTAG	GCAGCATAGTGAGCCCAGAANRG	GCAGCATAGTGAGCCCAGAANRG				0	0	0	0	41.1	0	0	0	CTTTCCACATAGGGAGCCCAGATTAGAAA	0.0277614	0
RNA	1	chr2	193658965	-	3	GCA-GAGAGGGAGCCCAGAAGAG	GCAGAGAGGGAGCCCAGAAGAG	GCAGCATAGTGAGCCCAGAANRG	GCAGCATAGTGAGCCCAGAANRG				0	0	0	0	46.8	0	0	0	CACTGCAGAGAGGGAGCCCAGAAGAGGGT	0.195697	0
RNA	1	chr2	193182028	-	3	CCC-CATAGTGTGCCCAGAACAG	CCCCATAGTGTGCCCAGAACAG	GCAGCATAGTGAGCCCAGAANRG	GCAGCATAGTGAGCCCAGAANRG				0	0	0	0	46.65	0	0	0	GCTACCCCATAGTGTGCCCAGAACAGCAG	0.19203	0
RNA	1	chr2	169207088	+	2	GCC-CATAGTCAGCCCAGAAGAG	GCCCATAGTCAGCCCAGAAGAG	GCAGCATAGTGAGCCCAGAANRG	GCAGCATAGTGAGCCCAGAANRG				0	0	0	0	46.87	0	0	0	TCTGCCCATAGTCAGCCCAGAAGAGGTAT	0.229441	0
RNA	1	chr2	165476190	-	3	GCA-GAAAGTGAGCCCAGAGCAG	GCAGAAAGTGAGCCCAGAGCAG	GCAGCATAGTGAGCCCAGAANRG	GCAGCATAGTGAGCCCAGAANRG				0	0	0	0	41.3	0	0	0	AATGGCAGAAAGTGAGCCCAGAGCAGCAC	0.230279	0
RNA	1	chr2	113873427	-	3	GCC-CACAGTGAGCCCAAAATAG	GCCCACAGTGAGCCCAAAATAG	GCAGCATAGTGAGCCCAGAANRG	GCAGCATAGTGAGCCCAGAANRG				0	0	0	0	43.34	0	0	0	TGATGCCCACAGTGAGCCCAAAATAGCTC	0.105117	0
DNA	1	chr2	238428828	+	3	GCCAGCAGAGGGGGCCCAGAAGAG	GCCAGCAGAGGGGGCCCAGAAGAG	GC-AGCATAGTGAGCCCAGAANRG	GCAGCATAGTGAGCCCAGAANRG				0	0	0	0	45.48	0	0	0	GAGGCCAGCAGAGGGGGCCCAGAAGAGGG	0.100818	0
DNA	1	chr2	218982931	-	3	GCTAGGATAGTGAGCCCATGAGAG	GCTAGGATAGTGAGCCCATGAGAG	GC-AGCATAGTGAGCCCAGAANRG	GCAGCATAGTGAGCCCAGAANRG				0	0	0	0	36.34	0	0	0	TGGCTAGGATAGTGAGCCCATGAGAGCTT	0.117359	0
DNA	1	chr2	8538275	-	3	GGGAGCATAGTGAGGCCAGGACAG	GGGAGCATAGTGAGGCCAGGACAG	GC-AGCATAGTGAGCCCAGAANRG	GCAGCATAGTGAGCCCAGAANRG				0	0	0	0	39.52	0	0	0	CAGGGAGCATAGTGAGGCCAGGACAGGGA	0.331576	0
DNA	1	chr2	232443359	+	3	GCAGCAGCAGAGAGCACAGAAAGG	GCAGCAGCAGAGAGCACAGAAAGG	GCAGCAT-AGTGAGCCCAGAANRG	GCAGCATAGTGAGCCCAGAANRG				0	0	0	0	44.2	0	0	0	AGAGCAGCAGCAGAGAGCACAGAAAGGTG	0.0937128	0
DNA	1	chr2	232331980	+	3	GCAGCAGCAGAGAGCACAGAAAGG	GCAGCAGCAGAGAGCACAGAAAGG	GCAGCAT-AGTGAGCCCAGAANRG	GCAGCATAGTGAGCCCAGAANRG				0	0	0	0	44.2	0	0	0	AGGGCAGCAGCAGAGAGCACAGAAAGGTG	0.092077	0
DNA	1	chr2	216915757	-	3	GCCCCATCAGTGAGCCCAGGAGGG	GCCCCATCAGTGAGCCCAGGAGGG	GCAGCAT-AGTGAGCCCAGAANRG	GCAGCATAGTGAGCCCAGAANRG				0	0	0	0	41.11	0	0	0	CAGCCCCATCAGTGAGCCCAGGAGGGGAG	0.219167	0
DNA	1	chr2	159070688	+	3	GCTGCATGAGAGAGCCCGGAAGAG	GCTGCATGAGAGAGCCCGGAAGAG	GCAGCAT-AGTGAGCCCAGAANRG	GCAGCATAGTGAGCCCAGAANRG				0	0	0	0	42.58	0	0	0	CTAGCTGCATGAGAGAGCCCGGAAGAGTG	0.118649	0
DNA	1	chr2	145479437	-	3	GAGGCATGAGTGAGCCCTGAAGAG	GAGGCATGAGTGAGCCCTGAAGAG	GCAGCAT-AGTGAGCCCAGAANRG	GCAGCATAGTGAGCCCAGAANRG				0	0	0	0	43.15	0	0	0	AAGAGGCATGAGTGAGCCCTGAAGAGACT	0.13728	0
DNA	1	chr2	31074499	-	3	ACAGCATGAGTGAGCCCAGCCCAG	ACAGCATGAGTGAGCCCAGCCCAG	GCAGCAT-AGTGAGCCCAGAANRG	GCAGCATAGTGAGCCCAGAANRG				0	0	0	0	41.31	0	0	0	AGACAGCATGAGTGAGCCCAGCCCAGATC	0.170466	0
DNA	1	chr2	79355050	-	3	GCAGGATAGAGAGCCCTAAAATAG	GCAGGATAGAGAGCCCTAAAATAG	GCAGCATAGTGAGCCC-AGAANRG	GCAGCATAGTGAGCCCAGAANRG				0	0	0	0	39.01	0	0	0	GAGCAGGATAGAGAGCCCTAAAATAGAAT	0.13046	0
DNA	1	chr2	136170462	+	3	GCAGAGATAGAGAGTCCAGAAAGG	GCAGAGATAGAGAGTCCAGAAAGG	GCAG-CATAGTGAGCCCAGAANRG	GCAGCATAGTGAGCCCAGAANRG				0	0	0	0	44.7	0	0	0	GGGGCAGAGATAGAGAGTCCAGAAAGGGG	0.0886905	0
DNA	1	chr2	216580280	+	3	GCAGGTACAGTGAGCCCAGACAAG	GCAGGTACAGTGAGCCCAGACAAG	GCAG-CATAGTGAGCCCAGAANRG	GCAGCATAGTGAGCCCAGAANRG				0	0	0	0	47.03	0	0	0	CTGGCAGGTACAGTGAGCCCAGACAAGAT	0.125185	0
DNA	1	chr2	216633191	+	3	GGAGTCATAGTCAGGCCAGAAGAG	GGAGTCATAGTCAGGCCAGAAGAG	GCAG-CATAGTGAGCCCAGAANRG	GCAGCATAGTGAGCCCAGAANRG				0	0	0	0	44.68	0	0	0	TCAGGAGTCATAGTCAGGCCAGAAGAGTG	0.119945	0
DNA	1	chr2	232282729	-	3	GCAGCACACTGAGCACAGAGAAGG	GCAGCACACTGAGCACAGAGAAGG	GCAGCATAGTGAGCCCAGA-ANRG	GCAGCATAGTGAGCCCAGAANRG				0	0	0	0	39.22	0	0	0	CAGCAGCACACTGAGCACAGAGAAGGGGC	0.247713	0
DNA	1	chr2	210514004	-	3	ACAGAATAGAGAGCCCAGAAACAG	ACAGAATAGAGAGCCCAGAAACAG	GCAGCATAGTGAGCCCAGA-ANRG	GCAGCATAGTGAGCCCAGAANRG				0	0	0	0	40.89	0	0	0	AAACAGAATAGAGAGCCCAGAAACAGTGC	0.131836	0
DNA	1	chr2	204649581	+	3	ACAGAATAGAGAGCCCAGAAATAG	ACAGAATAGAGAGCCCAGAAATAG	GCAGCATAGTGAGCCCAGA-ANRG	GCAGCATAGTGAGCCCAGAANRG				0	0	0	0	40.89	0	0	0	GGAACAGAATAGAGAGCCCAGAAATAGGG	0.462322	0
DNA	1	chr2	171898074	+	3	ACAGAATAGAGAGCCCAGAAATAG	ACAGAATAGAGAGCCCAGAAATAG	GCAGCATAGTGAGCCCAGA-ANRG	GCAGCATAGTGAGCCCAGAANRG				0	0	0	0	40.89	0	0	0	GGAACAGAATAGAGAGCCCAGAAATAGAT	0.460785	0
DNA	1	chr2	160431902	-	3	GCAGCTTTGTGAGTCCAGAAAAGG	GCAGCTTTGTGAGTCCAGAAAAGG	GCAGCATAGTGAGCCCAGA-ANRG	GCAGCATAGTGAGCCCAGAANRG				0	0	0	0	39.92	0	0	0	TTGCAGCTTTGTGAGTCCAGAAAAGGAGA	0.173937	0
DNA	1	chr2	160147642	+	3	ACAGAATAGAGAGCCCAGAAATAG	ACAGAATAGAGAGCCCAGAAATAG	GCAGCATAGTGAGCCCAGA-ANRG	GCAGCATAGTGAGCCCAGAANRG				0	0	0	0	40.89	0	0	0	GTAACAGAATAGAGAGCCCAGAAATAGAC	0.458149	0
DNA	1	chr2	156090688	-	3	ACAGAATAGAGAGCCCAGAAATAG	ACAGAATAGAGAGCCCAGAAATAG	GCAGCATAGTGAGCCCAGA-ANRG	GCAGCATAGTGAGCCCAGAANRG				0	0	0	0	40.89	0	0	0	GAACAGAATAGAGAGCCCAGAAATAGACC	0.117788	0
DNA	1	chr2	149031568	-	3	GCAGCAGAGTGAGCCCTGAGGAAG	GCAGCAGAGTGAGCCCTGAGGAAG	GCAGCATAGTGAGCCCAGA-ANRG	GCAGCATAGTGAGCCCAGAANRG				0	0	0	0	38.47	0	0	0	ATGCAGCAGAGTGAGCCCTGAGGAAGCGG	0.181734	0
DNA	1	chr2	134049815	+	3	GCAGAATAGGGAGCCCGGAAATAG	GCAGAATAGGGAGCCCGGAAATAG	GCAGCATAGTGAGCCCAGA-ANRG	GCAGCATAGTGAGCCCAGAANRG				0	0	0	0	38.01	0	0	0	GGAGCAGAATAGGGAGCCCGGAAATAGGC	0.479647	0
DNA	1	chr2	120159719	+	3	ACAGAATAGAGAGCCCAGAAATAG	ACAGAATAGAGAGCCCAGAAATAG	GCAGCATAGTGAGCCCAGA-ANRG	GCAGCATAGTGAGCCCAGAANRG				0	0	0	0	40.89	0	0	0	GGAACAGAATAGAGAGCCCAGAAATAGTG	0.456462	0
DNA	1	chr2	85598653	+	3	GCAGCTCAGTGGGCCCAGAAATGG	GCAGCTCAGTGGGCCCAGAAATGG	GCAGCATAGTGAGCCCAGA-ANRG	GCAGCATAGTGAGCCCAGAANRG				0	0	0	0	40.46	0	0	0	AGTGCAGCTCAGTGGGCCCAGAAATGGGC	0.601556	0
DNA	1	chr2	84012320	+	3	ACAGAATAGAGAGCCCAGAAATAG	ACAGAATAGAGAGCCCAGAAATAG	GCAGCATAGTGAGCCCAGA-ANRG	GCAGCATAGTGAGCCCAGAANRG				0	0	0	0	40.89	0	0	0	ATAACAGAATAGAGAGCCCAGAAATAGAC	0.456351	0
DNA	1	chr2	81770365	-	3	ACAGAATAGAGAGCCCAGAAATAG	ACAGAATAGAGAGCCCAGAAATAG	GCAGCATAGTGAGCCCAGA-ANRG	GCAGCATAGTGAGCCCAGAANRG				0	0	0	0	40.89	0	0	0	GAACAGAATAGAGAGCCCAGAAATAGACC	0.117788	0
DNA	1	chr2	81772190	-	3	ACAGAATAGAGAGCCCAGAAATAG	ACAGAATAGAGAGCCCAGAAATAG	GCAGCATAGTGAGCCCAGA-ANRG	GCAGCATAGTGAGCCCAGAANRG				0	0	0	0	40.89	0	0	0	GAACAGAATAGAGAGCCCAGAAATAGACC	0.117788	0
DNA	1	chr2	31391292	-	3	ACAGAATAGAGAGCCCAGAAATAG	ACAGAATAGAGAGCCCAGAAATAG	GCAGCATAGTGAGCCCAGA-ANRG	GCAGCATAGTGAGCCCAGAANRG				0	0	0	0	40.89	0	0	0	GAACAGAATAGAGAGCCCAGAAATAGACC	0.117788	0
DNA	1	chr2	11282487	+	3	ACAGAATAGAGAGCCCAGAAATAG	ACAGAATAGAGAGCCCAGAAATAG	GCAGCATAGTGAGCCCAGA-ANRG	GCAGCATAGTGAGCCCAGAANRG				0	0	0	0	40.89	0	0	0	GAAACAGAATAGAGAGCCCAGAAATAGAC	0.454716	0
DNA	1	chr2	232443359	+	3	GCAGCAGCAGAGAGCACAGAAAGG	GCAGCAGCAGAGAGCACAGAAAGG	GCAGCA-TAGTGAGCCCAGAANRG	GCAGCATAGTGAGCCCAGAANRG				0	0	0	0	44.2	0	0	0	AGAGCAGCAGCAGAGAGCACAGAAAGGTG	0.0937128	0
DNA	1	chr2	232331980	+	3	GCAGCAGCAGAGAGCACAGAAAGG	GCAGCAGCAGAGAGCACAGAAAGG	GCAGCA-TAGTGAGCCCAGAANRG	GCAGCATAGTGAGCCCAGAANRG				0	0	0	0	44.2	0	0	0	AGGGCAGCAGCAGAGAGCACAGAAAGGTG	0.092077	0
DNA	1	chr2	192674638	+	3	GCAGCAGTGCTGAGCCCAGGAGAG	GCAGCAGTGCTGAGCCCAGGAGAG	GCAGCA-TAGTGAGCCCAGAANRG	GCAGCATAGTGAGCCCAGAANRG				0	0	0	0	40.62	0	0	0	TGAGCAGCAGTGCTGAGCCCAGGAGAGGG	0.158543	0
RNA	1	chr2	209643981	-	3	GCTGCATAG-GACCTCAGAAAAG	GCTGCATAGGACCTCAGAAAAG	GCAGCATAGTGAGCCCAGAANRG	GCAGCATAGTGAGCCCAGAANRG				0	0	0	0	44.24	0	0	0	GCTTGCTGCATAGGACCTCAGAAAAGAAT	0.0566308	0
RNA	1	chr2	183546753	+	3	GCAGCACAG-GAGCCCAGGGGGG	GCAGCACAGGAGCCCAGGGGGG	GCAGCATAGTGAGCCCAGAANRG	GCAGCATAGTGAGCCCAGAANRG				0	0	0	0	36.16	0	0	0	CCGGCAGCACAGGAGCCCAGGGGGGAGGT	0.168423	0
RNA	1	chr2	164143990	-	2	GGAGCATAG-AAGCCCAGAACAG	GGAGCATAGAAGCCCAGAACAG	GCAGCATAGTGAGCCCAGAANRG	GCAGCATAGTGAGCCCAGAANRG				0	0	0	0	46.56	0	0	0	CTGAGGAGCATAGAAGCCCAGAACAGTAC	0.261996	0
RNA	1	chr2	159046548	-	3	GGTGCATAG-GAACCCAGAAGAG	GGTGCATAGGAACCCAGAAGAG	GCAGCATAGTGAGCCCAGAANRG	GCAGCATAGTGAGCCCAGAANRG				0	0	0	0	46.01	0	0	0	GAATGGTGCATAGGAACCCAGAAGAGACA	0.0661993	0
RNA	1	chr2	112453150	-	3	GGAGCATAG-GATCCCAGCACAG	GGAGCATAGGATCCCAGCACAG	GCAGCATAGTGAGCCCAGAANRG	GCAGCATAGTGAGCCCAGAANRG				0	0	0	0	41.16	0	0	0	ATGGGGAGCATAGGATCCCAGCACAGTAA	0.0457279	0
RNA	1	chr2	43633349	-	3	GCAACCTAG-GAGACCAGAAAAG	GCAACCTAGGAGACCAGAAAAG	GCAGCATAGTGAGCCCAGAANRG	GCAGCATAGTGAGCCCAGAANRG				0	0	0	0	45.71	0	0	0	ACCTGCAACCTAGGAGACCAGAAAAGCCT	0.0701947	0
RNA	1	chr2	31300463	-	3	GCACCATAG-GAGTTCAGAAAAG	GCACCATAGGAGTTCAGAAAAG	GCAGCATAGTGAGCCCAGAANRG	GCAGCATAGTGAGCCCAGAANRG				0	0	0	0	44.02	0	0	0	GTATGCACCATAGGAGTTCAGAAAAGGGA	0.0764298	0
RNA	1	chr2	20546893	+	3	GCATCACAG-GAGCCCAGTAGAG	GCATCACAGGAGCCCAGTAGAG	GCAGCATAGTGAGCCCAGAANRG	GCAGCATAGTGAGCCCAGAANRG				0	0	0	0	41.99	0	0	0	GGGGCATCACAGGAGCCCAGTAGAGGGGT	0.155543	0
RNA	1	chr2	8538275	-	3	GA-GCATAGTGAGGCCAGGACAG	GAGCATAGTGAGGCCAGGACAG	GCAGCATAGTGAGCCCAGAANRG	GCAGCATAGTGAGCCCAGAANRG				0	0	0	0	41.31	0	0	0	CAGGGAGCATAGTGAGGCCAGGACAGGGA	0.331576	0
RNA	1	chr2	113873427	-	3	GC-CCACAGTGAGCCCAAAATAG	GCCCACAGTGAGCCCAAAATAG	GCAGCATAGTGAGCCCAGAANRG	GCAGCATAGTGAGCCCAGAANRG				0	0	0	0	43.34	0	0	0	TGATGCCCACAGTGAGCCCAAAATAGCTC	0.105117	0
RNA	1	chr2	169207088	+	2	GC-CCATAGTCAGCCCAGAAGAG	GCCCATAGTCAGCCCAGAAGAG	GCAGCATAGTGAGCCCAGAANRG	GCAGCATAGTGAGCCCAGAANRG				0	0	0	0	46.87	0	0	0	TCTGCCCATAGTCAGCCCAGAAGAGGTAT	0.229441	0
RNA	1	chr2	193182028	-	3	CC-CCATAGTGTGCCCAGAACAG	CCCCATAGTGTGCCCAGAACAG	GCAGCATAGTGAGCCCAGAANRG	GCAGCATAGTGAGCCCAGAANRG				0	0	0	0	46.65	0	0	0	GCTACCCCATAGTGTGCCCAGAACAGCAG	0.19203	0
RNA	1	chr2	226798913	+	3	GCAGC-TGCTGAGCCCAGGAGAG	GCAGCTGCTGAGCCCAGGAGAG	GCAGCATAGTGAGCCCAGAANRG	GCAGCATAGTGAGCCCAGAANRG				0	0	0	0	42.06	0	0	0	GACGCAGCTGCTGAGCCCAGGAGAGAGCC	0.135642	0
RNA	1	chr2	219752464	-	3	GTAGC-AAGTGGGCCCAGAAAGG	GTAGCAAGTGGGCCCAGAAAGG	GCAGCATAGTGAGCCCAGAANRG	GCAGCATAGTGAGCCCAGAANRG				0	0	0	0	46.52	0	0	0	TGCAGTAGCAAGTGGGCCCAGAAAGGGCT	0.298131	0
RNA	1	chr2	193658965	-	3	GCAGA-GAGGGAGCCCAGAAGAG	GCAGAGAGGGAGCCCAGAAGAG	GCAGCATAGTGAGCCCAGAANRG	GCAGCATAGTGAGCCCAGAANRG				0	0	0	0	46.76	0	0	0	CACTGCAGAGAGGGAGCCCAGAAGAGGGT	0.195697	0
RNA	1	chr2	165476190	-	3	GCAGA-AAGTGAGCCCAGAGCAG	GCAGAAAGTGAGCCCAGAGCAG	GCAGCATAGTGAGCCCAGAANRG	GCAGCATAGTGAGCCCAGAANRG				0	0	0	0	41.26	0	0	0	AATGGCAGAAAGTGAGCCCAGAGCAGCAC	0.230279	0
RNA	1	chr2	105100355	-	3	GCAGC-GAGTGAGCACAGACAGG	GCAGCGAGTGAGCACAGACAGG	GCAGCATAGTGAGCCCAGAANRG	GCAGCATAGTGAGCCCAGAANRG				0	0	0	0	39.55	0	0	0	TCCTGCAGCGAGTGAGCACAGACAGGCTT	0.142854	0
RNA	1	chr2	76096129	-	3	GCAGC-TAGAGATCCGAGAATGG	GCAGCTAGAGATCCGAGAATGG	GCAGCATAGTGAGCCCAGAANRG	GCAGCATAGTGAGCCCAGAANRG				0	0	0	0	43.78	0	0	0	GCATGCAGCTAGAGATCCGAGAATGGGCA	0.0611161	0
RNA	1	chr2	190810947	-	3	G-AGCACAATGAGCCCAGGAGGG	GAGCACAATGAGCCCAGGAGGG	GCAGCATAGTGAGCCCAGAANRG	GCAGCATAGTGAGCCCAGAANRG				0	0	0	0	42.18	0	0	0	GCTGGAGCACAATGAGCCCAGGAGGGTGG	0.417577	0
RNA	1	chr2	189024589	-	3	G-AGACTAGTGAGCCCGGAACAG	GAGACTAGTGAGCCCGGAACAG	GCAGCATAGTGAGCCCAGAANRG	GCAGCATAGTGAGCCCAGAANRG				0	0	0	0	44.36	0	0	0	AGTGGAGACTAGTGAGCCCGGAACAGACG	0.151871	0
RNA	1	chr2	169207088	+	3	G-CCCATAGTCAGCCCAGAAGAG	GCCCATAGTCAGCCCAGAAGAG	GCAGCATAGTGAGCCCAGAANRG	GCAGCATAGTGAGCCCAGAANRG				0	0	0	0	46.74	0	0	0	TCTGCCCATAGTCAGCCCAGAAGAGGTAT	0.229441	0
RNA	1	chr2	152772492	-	3	G-AGCTCAGTGAGTCCAGAATGG	GAGCTCAGTGAGTCCAGAATGG	GCAGCATAGTGAGCCCAGAANRG	GCAGCATAGTGAGCCCAGAANRG				0	0	0	0	46.02	0	0	0	AGAAGAGCTCAGTGAGTCCAGAATGGGCC	0.129419	0
RNA	1	chr2	128629365	+	3	G-ACCATAGGGACCCCAGAACAG	GACCATAGGGACCCCAGAACAG	GCAGCATAGTGAGCCCAGAANRG	GCAGCATAGTGAGCCCAGAANRG				0	0	0	0	45.99	0	0	0	GGTGACCATAGGGACCCCAGAACAGCTTA	0.107398	0
RNA	1	chr2	8538275	-	2	G-AGCATAGTGAGGCCAGGACAG	GAGCATAGTGAGGCCAGGACAG	GCAGCATAGTGAGCCCAGAANRG	GCAGCATAGTGAGCCCAGAANRG				0	0	0	0	41.46	0	0	0	CAGGGAGCATAGTGAGGCCAGGACAGGGA	0.331576	0
DNA	1	chr2	226547211	+	3	GCAGGAGAGTGAGCCAAGCAATGG	GCAGGAGAGTGAGCCAAGCAATGG	GCAGCATAGTGAGCCCAG-AANRG	GCAGCATAGTGAGCCCAGAANRG				0	0	0	0	39.98	0	0	0	GAGGCAGGAGAGTGAGCCAAGCAATGGGT	0.23805	0
DNA	1	chr2	210514004	-	3	ACAGAATAGAGAGCCCAGAAACAG	ACAGAATAGAGAGCCCAGAAACAG	GCAGCATAGTGAGCCCAG-AANRG	GCAGCATAGTGAGCCCAGAANRG				0	0	0	0	41.89	0	0	0	AAACAGAATAGAGAGCCCAGAAACAGTGC	0.131836	0
DNA	1	chr2	204649581	+	3	ACAGAATAGAGAGCCCAGAAATAG	ACAGAATAGAGAGCCCAGAAATAG	GCAGCATAGTGAGCCCAG-AANRG	GCAGCATAGTGAGCCCAGAANRG				0	0	0	0	41.89	0	0	0	GGAACAGAATAGAGAGCCCAGAAATAGGG	0.462322	0
DNA	1	chr2	171898074	+	3	ACAGAATAGAGAGCCCAGAAATAG	ACAGAATAGAGAGCCCAGAAATAG	GCAGCATAGTGAGCCCAG-AANRG	GCAGCATAGTGAGCCCAGAANRG				0	0	0	0	41.89	0	0	0	GGAACAGAATAGAGAGCCCAGAAATAGAT	0.460785	0
DNA	1	chr2	160431902	-	3	GCAGCTTTGTGAGTCCAGAAAAGG	GCAGCTTTGTGAGTCCAGAAAAGG	GCAGCATAGTGAGCCCAG-AANRG	GCAGCATAGTGAGCCCAGAANRG				0	0	0	0	40.92	0	0	0	TTGCAGCTTTGTGAGTCCAGAAAAGGAGA	0.173937	0
DNA	1	chr2	160147642	+	3	ACAGAATAGAGAGCCCAGAAATAG	ACAGAATAGAGAGCCCAGAAATAG	GCAGCATAGTGAGCCCAG-AANRG	GCAGCATAGTGAGCCCAGAANRG				0	0	0	0	41.89	0	0	0	GTAACAGAATAGAGAGCCCAGAAATAGAC	0.458149	0
DNA	1	chr2	156090688	-	3	ACAGAATAGAGAGCCCAGAAATAG	ACAGAATAGAGAGCCCAGAAATAG	GCAGCATAGTGAGCCCAG-AANRG	GCAGCATAGTGAGCCCAGAANRG				0	0	0	0	41.89	0	0	0	GAACAGAATAGAGAGCCCAGAAATAGACC	0.117788	0
DNA	1	chr2	134049815	+	3	GCAGAATAGGGAGCCCGGAAATAG	GCAGAATAGGGAGCCCGGAAATAG	GCAGCATAGTGAGCCCAG-AANRG	GCAGCATAGTGAGCCCAGAANRG				0	0	0	0	39.01	0	0	0	GGAGCAGAATAGGGAGCCCGGAAATAGGC	0.479647	0
DNA	1	chr2	85598653	+	3	GCAGCTCAGTGGGCCCAGAAATGG	GCAGCTCAGTGGGCCCAGAAATGG	GCAGCATAGTGAGCCCAG-AANRG	GCAGCATAGTGAGCCCAGAANRG				0	0	0	0	41.46	0	0	0	AGTGCAGCTCAGTGGGCCCAGAAATGGGC	0.601556	0
DNA	1	chr2	84012320	+	3	ACAGAATAGAGAGCCCAGAAATAG	ACAGAATAGAGAGCCCAGAAATAG	GCAGCATAGTGAGCCCAG-AANRG	GCAGCATAGTGAGCCCAGAANRG				0	0	0	0	41.89	0	0	0	ATAACAGAATAGAGAGCCCAGAAATAGAC	0.456351	0
DNA	1	chr2	81770365	-	3	ACAGAATAGAGAGCCCAGAAATAG	ACAGAATAGAGAGCCCAGAAATAG	GCAGCATAGTGAGCCCAG-AANRG	GCAGCATAGTGAGCCCAGAANRG				0	0	0	0	41.89	0	0	0	GAACAGAATAGAGAGCCCAGAAATAGACC	0.117788	0
DNA	1	chr2	81772190	-	3	ACAGAATAGAGAGCCCAGAAATAG	ACAGAATAGAGAGCCCAGAAATAG	GCAGCATAGTGAGCCCAG-AANRG	GCAGCATAGTGAGCCCAGAANRG				0	0	0	0	41.89	0	0	0	GAACAGAATAGAGAGCCCAGAAATAGACC	0.117788	0
DNA	1	chr2	32715393	-	3	ACAGAATAGAGAGCCCAGGAACAG	ACAGAATAGAGAGCCCAGGAACAG	GCAGCATAGTGAGCCCAG-AANRG	GCAGCATAGTGAGCCCAGAANRG				0	0	0	0	41.89	0	0	0	GAACAGAATAGAGAGCCCAGGAACAGAGC	0.135763	0
DNA	1	chr2	31391292	-	3	ACAGAATAGAGAGCCCAGAAATAG	ACAGAATAGAGAGCCCAGAAATAG	GCAGCATAGTGAGCCCAG-AANRG	GCAGCATAGTGAGCCCAGAANRG				0	0	0	0	41.89	0	0	0	GAACAGAATAGAGAGCCCAGAAATAGACC	0.117788	0
DNA	1	chr2	19689813	+	3	GAAGCAGAGTGTGCCCAGGAATGG	GAAGCAGAGTGTGCCCAGGAATGG	GCAGCATAGTGAGCCCAG-AANRG	GCAGCATAGTGAGCCCAGAANRG				0	0	0	0	41.54	0	0	0	AGAGAAGCAGAGTGTGCCCAGGAATGGCC	0.232704	0
DNA	1	chr2	11282487	+	3	ACAGAATAGAGAGCCCAGAAATAG	ACAGAATAGAGAGCCCAGAAATAG	GCAGCATAGTGAGCCCAG-AANRG	GCAGCATAGTGAGCCCAGAANRG				0	0	0	0	41.89	0	0	0	GAAACAGAATAGAGAGCCCAGAAATAGAC	0.454716	0
DNA	1	chr2	8538274	-	3	GGAGCATAGTGAGGCCAGGACAGG	GGAGCATAGTGAGGCCAGGACAGG	GCAGCATAGTGAGCCCAG-AANRG	GCAGCATAGTGAGCCCAGAANRG				0	0	0	0	41.27	0	0	0	AGGGAGCATAGTGAGGCCAGGACAGGGAG	0.1926	0
DNA	1	chr2	120159719	+	3	ACAGAATAGAGAGCCCAGAAATAG	ACAGAATAGAGAGCCCAGAAATAG	GCAGCATAGTGAGCCCAG-AANRG	GCAGCATAGTGAGCCCAGAANRG				0	0	0	0	41.89	0	0	0	GGAACAGAATAGAGAGCCCAGAAATAGTG	0.456462	0
RNA	1	chr2	1471776	+	3	ACAGCATAGTGGGCTCA-AAGGG	ACAGCATAGTGGGCTCAAAGGG	GCAGCATAGTGAGCCCAGAANRG	GCAGCATAGTGAGCCCAGAANRG				0	0	0	0	41.07	0	0	0	TAGACAGCATAGTGGGCTCAAAGGGATTC	0.142022	0
RNA	1	chr2	4995773	-	3	GCAAAACAGTGAGCCCA-AAGAG	GCAAAACAGTGAGCCCAAAGAG	GCAGCATAGTGAGCCCAGAANRG	GCAGCATAGTGAGCCCAGAANRG				0	0	0	0	43.3	0	0	0	TTTGGCAAAACAGTGAGCCCAAAGAGATC	0.105685	0
RNA	1	chr2	28001608	-	3	GCAGAACTGTGAGCCCA-AATAG	GCAGAACTGTGAGCCCAAATAG	GCAGCATAGTGAGCCCAGAANRG	GCAGCATAGTGAGCCCAGAANRG				0	0	0	0	43.2	0	0	0	GCCTGCAGAACTGTGAGCCCAAATAGACT	0.0598403	0
RNA	1	chr2	61990498	+	3	GCAACATAGTGAGCCCC-TATGG	GCAACATAGTGAGCCCCTATGG	GCAGCATAGTGAGCCCAGAANRG	GCAGCATAGTGAGCCCAGAANRG				0	0	0	0	35.72	0	0	0	TGGGCAACATAGTGAGCCCCTATGGATTA	0.285623	0
RNA	1	chr2	228063599	-	3	GAAGCATAGTGAGCTCA-CAGAG	GAAGCATAGTGAGCTCACAGAG	GCAGCATAGTGAGCCCAGAANRG	GCAGCATAGTGAGCCCAGAANRG				0	0	0	0	36.86	0	0	0	TATAGAAGCATAGTGAGCTCACAGAGTTC	0.075597	0
RNA	1	chr2	217931864	-	3	GCAGCATAGGGAACCCG-AAGAG	GCAGCATAGGGAACCCGAAGAG	GCAGCATAGTGAGCCCAGAANRG	GCAGCATAGTGAGCCCAGAANRG				0	0	0	0	39.29	0	0	0	ACAGGCAGCATAGGGAACCCGAAGAGTCA	0.203532	0
RNA	1	chr2	217049451	-	3	GCAGCATAGTCAGCTCA-CAGAG	GCAGCATAGTCAGCTCACAGAG	GCAGCATAGTGAGCCCAGAANRG	GCAGCATAGTGAGCCCAGAANRG				0	0	0	0	36.29	0	0	0	GTCTGCAGCATAGTCAGCTCACAGAGCGA	0.0822825	0
RNA	1	chr2	188879682	+	3	GCAGCATAGTGAGTACG-AAGGG	GCAGCATAGTGAGTACGAAGGG	GCAGCATAGTGAGCCCAGAANRG	GCAGCATAGTGAGCCCAGAANRG				0	0	0	0	37.69	0	0	0	GGTGCAGCATAGTGAGTACGAAGGGACCA	0.102277	0
RNA	1	chr2	119286459	+	3	GCAGCATGGTGTGCCCA-GAGAG	GCAGCATGGTGTGCCCAGAGAG	GCAGCATAGTGAGCCCAGAANRG	GCAGCATAGTGAGCCCAGAANRG				0	0	0	0	37.82	0	0	0	GTGGCAGCATGGTGTGCCCAGAGAGAACA	0.491861	0
RNA	1	chr2	83654479	-	3	GCAGCACAGTGAGCAAA-AAGAG	GCAGCACAGTGAGCAAAAAGAG	GCAGCATAGTGAGCCCAGAANRG	GCAGCATAGTGAGCCCAGAANRG				0	0	0	0	39.46	0	0	0	AATGGCAGCACAGTGAGCAAAAAGAGGTG	0.101803	0
RNA	1	chr2	82468303	-	3	GTAGCATCGTGAGCCAA-AAAAG	GTAGCATCGTGAGCCAAAAAAG	GCAGCATAGTGAGCCCAGAANRG	GCAGCATAGTGAGCCCAGAANRG				0	0	0	0	41.19	0	0	0	GAAAGTAGCATCGTGAGCCAAAAAAGAAA	0.0811351	0
DNA	1	chr2	121844613	+	3	GCAGCATTCTCAGCACCAGAACAG	GCAGCATTCTCAGCACCAGAACAG	GCAGCATAGTGAGC-CCAGAANRG	GCAGCATAGTGAGCCCAGAANRG				0	0	0	0	44.48	0	0	0	ATTGCAGCATTCTCAGCACCAGAACAGTG	0.0919064	0
RNA	1	chr2	231294493	+	3	GGAG-ATAGTCATCCCAGAAAGG	GGAGATAGTCATCCCAGAAAGG	GCAGCATAGTGAGCCCAGAANRG	GCAGCATAGTGAGCCCAGAANRG				0	0	0	0	45.77	0	0	0	ATGGGAGATAGTCATCCCAGAAAGGAGCT	0.116636	0
RNA	1	chr2	218862006	-	3	ACAG-ATACAGAGCCCAGAAAGG	ACAGATACAGAGCCCAGAAAGG	GCAGCATAGTGAGCCCAGAANRG	GCAGCATAGTGAGCCCAGAANRG				0	0	0	0	46.73	0	0	0	CCCCACAGATACAGAGCCCAGAAAGGTGA	0.134236	0
RNA	1	chr2	211881287	+	3	GCAG-ATAGTGAGGGCAAAAGAG	GCAGATAGTGAGGGCAAAAGAG	GCAGCATAGTGAGCCCAGAANRG	GCAGCATAGTGAGCCCAGAANRG				0	0	0	0	40.5	0	0	0	TAGGCAGATAGTGAGGGCAAAAGAGTCAT	0.142324	0
RNA	1	chr2	193658965	-	2	GCAG-AGAGGGAGCCCAGAAGAG	GCAGAGAGGGAGCCCAGAAGAG	GCAGCATAGTGAGCCCAGAANRG	GCAGCATAGTGAGCCCAGAANRG				0	0	0	0	46.97	0	0	0	CACTGCAGAGAGGGAGCCCAGAAGAGGGT	0.195697	0
RNA	1	chr2	186894770	-	3	GCAG-ATAGTGAGGGCAAAAGAG	GCAGATAGTGAGGGCAAAAGAG	GCAGCATAGTGAGCCCAGAANRG	GCAGCATAGTGAGCCCAGAANRG				0	0	0	0	40.5	0	0	0	TTAGGCAGATAGTGAGGGCAAAAGAGTCC	0.0713921	0
RNA	1	chr2	169207088	+	3	GCCC-ATAGTCAGCCCAGAAGAG	GCCCATAGTCAGCCCAGAAGAG	GCAGCATAGTGAGCCCAGAANRG	GCAGCATAGTGAGCCCAGAANRG				0	0	0	0	46.68	0	0	0	TCTGCCCATAGTCAGCCCAGAAGAGGTAT	0.229441	0
RNA	1	chr2	165476190	-	2	GCAG-AAAGTGAGCCCAGAGCAG	GCAGAAAGTGAGCCCAGAGCAG	GCAGCATAGTGAGCCCAGAANRG	GCAGCATAGTGAGCCCAGAANRG				0	0	0	0	41.47	0	0	0	AATGGCAGAAAGTGAGCCCAGAGCAGCAC	0.230279	0
RNA	1	chr2	106208765	-	3	GCAG-ATAGTGAGGGCAAAAGAG	GCAGATAGTGAGGGCAAAAGAG	GCAGCATAGTGAGCCCAGAANRG	GCAGCATAGTGAGCCCAGAANRG				0	0	0	0	40.5	0	0	0	TTAGGCAGATAGTGAGGGCAAAAGAGTCC	0.0713921	0
RNA	1	chr2	105822845	+	3	GCAG-AAAATGAGCCCAGAGAGG	GCAGAAAATGAGCCCAGAGAGG	GCAGCATAGTGAGCCCAGAANRG	GCAGCATAGTGAGCCCAGAANRG				0	0	0	0	41.12	0	0	0	ATAGCAGAAAATGAGCCCAGAGAGGTTAC	0.149764	0
DNA	1	chr2	216853348	+	3	GCAGCATAGGGGAGCACATAAAAG	GCAGCATAGGGGAGCACATAAAAG	GCAGCATAGT-GAGCCCAGAANRG	GCAGCATAGTGAGCCCAGAANRG				0	0	0	0	39.2	0	0	0	TCTGCAGCATAGGGGAGCACATAAAAGAA	0.089971	0
DNA	1	chr2	18787937	-	3	GCAGCATAGTGCTGCCCAGAGGGG	GCAGCATAGTGCTGCCCAGAGGGG	GCAGCATAGT-GAGCCCAGAANRG	GCAGCATAGTGAGCCCAGAANRG				0	0	0	0	45.1	0	0	0	AGGCAGCATAGTGCTGCCCAGAGGGGCCA	0.444655	0
DNA	1	chr2	9638246	-	3	GCAGCAGAGCAAAGCCCAGAAGAG	GCAGCAGAGCAAAGCCCAGAAGAG	GCAGCATAGT-GAGCCCAGAANRG	GCAGCATAGTGAGCCCAGAANRG				0	0	0	0	45.47	0	0	0	TGGCAGCAGAGCAAAGCCCAGAAGAGGCT	0.150431	0
DNA	1	chr2	8538275	-	3	GGGAGCATAGTGAGGCCAGGACAG	GGGAGCATAGTGAGGCCAGGACAG	G-CAGCATAGTGAGCCCAGAANRG	GCAGCATAGTGAGCCCAGAANRG				0	0	0	0	39.52	0	0	0	CAGGGAGCATAGTGAGGCCAGGACAGGGA	0.331576	0
DNA	1	chr2	150594023	-	3	GGCAGCAAAGTGAGCCCAGGTAAG	GGCAGCAAAGTGAGCCCAGGTAAG	G-CAGCATAGTGAGCCCAGAANRG	GCAGCATAGTGAGCCCAGAANRG				0	0	0	0	41.3	0	0	0	CAGGCAGCAAAGTGAGCCCAGGTAAGTAA	0.43965	0
DNA	1	chr2	238428828	+	3	GCCAGCAGAGGGGGCCCAGAAGAG	GCCAGCAGAGGGGGCCCAGAAGAG	G-CAGCATAGTGAGCCCAGAANRG	GCAGCATAGTGAGCCCAGAANRG				0	0	0	0	45.5	0	0	0	GAGGCCAGCAGAGGGGGCCCAGAAGAGGG	0.100818	0
DNA	1	chr2	165444349	+	3	GACAGCAAAGTGAATCCAGAAAGG	GACAGCAAAGTGAATCCAGAAAGG	G-CAGCATAGTGAGCCCAGAANRG	GCAGCATAGTGAGCCCAGAANRG				0	0	0	0	44.1	0	0	0	GAAGACAGCAAAGTGAATCCAGAAAGGTG	0.0699392	0
DNA	1	chr2	194714609	+	3	GCAGCATTTTGAGGCCCTGAATAG	GCAGCATTTTGAGGCCCTGAATAG	GCAGCATAGTGA-GCCCAGAANRG	GCAGCATAGTGAGCCCAGAANRG				0	0	0	0	41.98	0	0	0	GATGCAGCATTTTGAGGCCCTGAATAGGG	0.107924	0
DNA	1	chr2	18787937	-	2	GCAGCATAGTGCTGCCCAGAGGGG	GCAGCATAGTGCTGCCCAGAGGGG	GCAGCATAGTGA-GCCCAGAANRG	GCAGCATAGTGAGCCCAGAANRG				0	0	0	0	45.8	0	0	0	AGGCAGCATAGTGCTGCCCAGAGGGGCCA	0.444655	0
DNA	1	chr2	9638246	-	3	GCAGCAGAGCAAAGCCCAGAAGAG	GCAGCAGAGCAAAGCCCAGAAGAG	GCAGCATAGTGA-GCCCAGAANRG	GCAGCATAGTGAGCCCAGAANRG				0	0	0	0	45.17	0	0	0	TGGCAGCAGAGCAAAGCCCAGAAGAGGCT	0.150431	0
DNA	1	chr2	216580280	+	3	GCAGGTACAGTGAGCCCAGACAAG	GCAGGTACAGTGAGCCCAGACAAG	GCA-GCATAGTGAGCCCAGAANRG	GCAGCATAGTGAGCCCAGAANRG				0	0	0	0	47.05	0	0	0	CTGGCAGGTACAGTGAGCCCAGACAAGAT	0.125185	0
RNA	1	chr2	45819363	-	3	GCAGCATTCTGAGCC-AGATGGG	GCAGCATTCTGAGCCAGATGGG	GCAGCATAGTGAGCCCAGAANRG	GCAGCATAGTGAGCCCAGAANRG				0	0	0	0	38.97	0	0	0	AAAGGCAGCATTCTGAGCCAGATGGGTTC	0.121285	0
RNA	1	chr2	45819363	-	3	GCAGCATTCTGAGC-CAGATGGG	GCAGCATTCTGAGCCAGATGGG	GCAGCATAGTGAGCCCAGAANRG	GCAGCATAGTGAGCCCAGAANRG				0	0	0	0	39.37	0	0	0	AAAGGCAGCATTCTGAGCCAGATGGGTTC	0.121285	0
RNA	1	chr2	45819363	-	3	GCAGCATTCTGAG-CCAGATGGG	GCAGCATTCTGAGCCAGATGGG	GCAGCATAGTGAGCCCAGAANRG	GCAGCATAGTGAGCCCAGAANRG				0	0	0	0	39.97	0	0	0	AAAGGCAGCATTCTGAGCCAGATGGGTTC	0.121285	0
RNA	1	chr2	15114768	-	3	GCAGCATAATGAACT-AGAAGAG	GCAGCATAATGAACTAGAAGAG	GCAGCATAGTGAGCCCAGAANRG	GCAGCATAGTGAGCCCAGAANRG				0	0	0	0	42.24	0	0	0	ATGTGCAGCATAATGAACTAGAAGAGGAT	0.0830811	0
RNA	1	chr2	15114768	-	3	GCAGCATAATGAAC-TAGAAGAG	GCAGCATAATGAACTAGAAGAG	GCAGCATAGTGAGCCCAGAANRG	GCAGCATAGTGAGCCCAGAANRG				0	0	0	0	42.24	0	0	0	ATGTGCAGCATAATGAACTAGAAGAGGAT	0.0830811	0
RNA	1	chr2	15114768	-	3	GCAGCATAATGAA-CTAGAAGAG	GCAGCATAATGAACTAGAAGAG	GCAGCATAGTGAGCCCAGAANRG	GCAGCATAGTGAGCCCAGAANRG				0	0	0	0	42.84	0	0	0	ATGTGCAGCATAATGAACTAGAAGAGGAT	0.0830811	0
DNA	1	chr2	216580280	+	3	GCAGGTACAGTGAGCCCAGACAAG	GCAGGTACAGTGAGCCCAGACAAG	GCAGC-ATAGTGAGCCCAGAANRG	GCAGCATAGTGAGCCCAGAANRG				0	0	0	0	47.03	0	0	0	CTGGCAGGTACAGTGAGCCCAGACAAGAT	0.125185	0
DNA	1	chr2	136170462	+	3	GCAGAGATAGAGAGTCCAGAAAGG	GCAGAGATAGAGAGTCCAGAAAGG	GCAGC-ATAGTGAGCCCAGAANRG	GCAGCATAGTGAGCCCAGAANRG				0	0	0	0	44.7	0	0	0	GGGGCAGAGATAGAGAGTCCAGAAAGGGG	0.0886905	0
RNA	1	chr2	64780379	-	3	GCAGCATTCTGAG-CCAGAGTGG	GCAGCATTCTGAGCCAGAGTGG	GCAGCATAGTGAGCCCAGAANRG	GCAGCATAGTGAGCCCAGAANRG				0	0	0	0	39.97	0	0	0	GTTTGCAGCATTCTGAGCCAGAGTGGTAG	0.12152	0
RNA	1	chr2	64780379	-	3	GCAGCATTCTGAGC-CAGAGTGG	GCAGCATTCTGAGCCAGAGTGG	GCAGCATAGTGAGCCCAGAANRG	GCAGCATAGTGAGCCCAGAANRG				0	0	0	0	39.37	0	0	0	GTTTGCAGCATTCTGAGCCAGAGTGGTAG	0.12152	0
RNA	1	chr2	64780379	-	3	GCAGCATTCTGAGCC-AGAGTGG	GCAGCATTCTGAGCCAGAGTGG	GCAGCATAGTGAGCCCAGAANRG	GCAGCATAGTGAGCCCAGAANRG				0	0	0	0	38.97	0	0	0	GTTTGCAGCATTCTGAGCCAGAGTGGTAG	0.12152	0
RNA	1	chr2	74980319	+	3	GCAGCATGCTGAG-GCAGAAGGG	GCAGCATGCTGAGGCAGAAGGG	GCAGCATAGTGAGCCCAGAANRG	GCAGCATAGTGAGCCCAGAANRG				0	0	0	0	44.07	0	0	0	AAGGCAGCATGCTGAGGCAGAAGGGGCAT	0.185848	0
RNA	1	chr2	74980319	+	3	GCAGCATGCTGAGG-CAGAAGGG	GCAGCATGCTGAGGCAGAAGGG	GCAGCATAGTGAGCCCAGAANRG	GCAGCATAGTGAGCCCAGAANRG				0	0	0	0	44.07	0	0	0	AAGGCAGCATGCTGAGGCAGAAGGGGCAT	0.185848	0
DNA	1	chr2	216853348	+	3	GCAGCATAGGGGAGCACATAAAAG	GCAGCATAGGGGAGCACATAAAAG	GCAGCATAGTG-AGCCCAGAANRG	GCAGCATAGTGAGCCCAGAANRG				0	0	0	0	39.1	0	0	0	TCTGCAGCATAGGGGAGCACATAAAAGAA	0.089971	0
DNA	1	chr2	18787937	-	2	GCAGCATAGTGCTGCCCAGAGGGG	GCAGCATAGTGCTGCCCAGAGGGG	GCAGCATAGTG-AGCCCAGAANRG	GCAGCATAGTGAGCCCAGAANRG				0	0	0	0	45.8	0	0	0	AGGCAGCATAGTGCTGCCCAGAGGGGCCA	0.444655	0
DNA	1	chr2	9638246	-	3	GCAGCAGAGCAAAGCCCAGAAGAG	GCAGCAGAGCAAAGCCCAGAAGAG	GCAGCATAGTG-AGCCCAGAANRG	GCAGCATAGTGAGCCCAGAANRG				0	0	0	0	45.47	0	0	0	TGGCAGCAGAGCAAAGCCCAGAAGAGGCT	0.150431	0
RNA	1	chr2	235043138	+	3	GCTGGATAGTGAGCCC-GAGCGG	GCTGGATAGTGAGCCCGAGCGG	GCAGCATAGTGAGCCCAGAANRG	GCAGCATAGTGAGCCCAGAANRG				0	0	0	0	38.55	0	0	0	AGAGCTGGATAGTGAGCCCGAGCGGGTGG	0.16867	0
RNA	1	chr2	217931864	-	2	GCAGCATAGGGAACCC-GAAGAG	GCAGCATAGGGAACCCGAAGAG	GCAGCATAGTGAGCCCAGAANRG	GCAGCATAGTGAGCCCAGAANRG				0	0	0	0	43.29	0	0	0	ACAGGCAGCATAGGGAACCCGAAGAGTCA	0.203532	0
RNA	1	chr2	210194829	-	3	GCAGTATAGTGAGGCT-GAAAGG	GCAGTATAGTGAGGCTGAAAGG	GCAGCATAGTGAGCCCAGAANRG	GCAGCATAGTGAGCCCAGAANRG				0	0	0	0	41.1	0	0	0	AGTGGCAGTATAGTGAGGCTGAAAGGGAA	0.110162	0
RNA	1	chr2	188879682	+	2	GCAGCATAGTGAGTAC-GAAGGG	GCAGCATAGTGAGTACGAAGGG	GCAGCATAGTGAGCCCAGAANRG	GCAGCATAGTGAGCCCAGAANRG				0	0	0	0	41.69	0	0	0	GGTGCAGCATAGTGAGTACGAAGGGACCA	0.102277	0
RNA	1	chr2	148670729	-	3	GCAGCAGAGTGAGACC-GAGGGG	GCAGCAGAGTGAGACCGAGGGG	GCAGCATAGTGAGCCCAGAANRG	GCAGCATAGTGAGCCCAGAANRG				0	0	0	0	37.36	0	0	0	CTGGGCAGCAGAGTGAGACCGAGGGGAAG	0.104173	0
RNA	1	chr2	61990498	+	3	GCAACATAGTGAGCCC-CTATGG	GCAACATAGTGAGCCCCTATGG	GCAGCATAGTGAGCCCAGAANRG	GCAGCATAGTGAGCCCAGAANRG				0	0	0	0	35.72	0	0	0	TGGGCAACATAGTGAGCCCCTATGGATTA	0.285623	0
DNA	1	chr2	216853348	+	3	GCAGCATAGGGGAGCACATAAAAG	GCAGCATAGGGGAGCACATAAAAG	GCAGCATA-GTGAGCCCAGAANRG	GCAGCATAGTGAGCCCAGAANRG				0	0	0	0	39.35	0	0	0	TCTGCAGCATAGGGGAGCACATAAAAGAA	0.089971	0
DNA	1	chr2	60261240	-	3	CCAGCACATGTGAGCCCAGATGGG	CCAGCACATGTGAGCCCAGATGGG	GCAGCATA-GTGAGCCCAGAANRG	GCAGCATAGTGAGCCCAGAANRG				0	0	0	0	47	0	0	0	TGCCAGCACATGTGAGCCCAGATGGGGCC	0.209084	0
RNA	1	chr2	240138652	+	3	CCAGCTTAGTG-GCCCAGAGCGG	CCAGCTTAGTGGCCCAGAGCGG	GCAGCATAGTGAGCCCAGAANRG	GCAGCATAGTGAGCCCAGAANRG				0	0	0	0	40.76	0	0	0	TGCCCAGCTTAGTGGCCCAGAGCGGGGGT	0.150166	0
RNA	1	chr2	217994596	+	3	GCAGCAGAGTC-TCCCAGAAGAG	GCAGCAGAGTCTCCCAGAAGAG	GCAGCATAGTGAGCCCAGAANRG	GCAGCATAGTGAGCCCAGAANRG				0	0	0	0	45.06	0	0	0	GGGGCAGCAGAGTCTCCCAGAAGAGAGCC	0.156024	0
RNA	1	chr2	198761038	+	3	GCAGAATCTTG-GCCCAGAATAG	GCAGAATCTTGGCCCAGAATAG	GCAGCATAGTGAGCCCAGAANRG	GCAGCATAGTGAGCCCAGAANRG				0	0	0	0	46.28	0	0	0	AAAGCAGAATCTTGGCCCAGAATAGATTT	0.127222	0
RNA	1	chr2	164143990	-	3	GGAGCATAGAA-GCCCAGAACAG	GGAGCATAGAAGCCCAGAACAG	GCAGCATAGTGAGCCCAGAANRG	GCAGCATAGTGAGCCCAGAANRG				0	0	0	0	45.76	0	0	0	CTGAGGAGCATAGAAGCCCAGAACAGTAC	0.261996	0
RNA	1	chr2	148137347	-	3	GCAGCAGAGTG-GCCCAGTTTGG	GCAGCAGAGTGGCCCAGTTTGG	GCAGCATAGTGAGCCCAGAANRG	GCAGCATAGTGAGCCCAGAANRG				0	0	0	0	35.86	0	0	0	GACAGCAGCAGAGTGGCCCAGTTTGGATG	0.0957707	0
RNA	1	chr2	145235869	-	3	GCAACATGGTG-GCCAAGAACAG	GCAACATGGTGGCCAAGAACAG	GCAGCATAGTGAGCCCAGAANRG	GCAGCATAGTGAGCCCAGAANRG				0	0	0	0	44.35	0	0	0	AGCAGCAACATGGTGGCCAAGAACAGAAA	0.0612449	0
RNA	1	chr2	144517233	+	3	GCCGCGTAGTG-GCCCGGAAAAG	GCCGCGTAGTGGCCCGGAAAAG	GCAGCATAGTGAGCCCAGAANRG	GCAGCATAGTGAGCCCAGAANRG				0	0	0	0	43.73	0	0	0	CGAGCCGCGTAGTGGCCCGGAAAAGTTTG	0.193197	0
RNA	1	chr2	85401809	-	3	GCTGCACAATG-GCCCAGAAGAG	GCTGCACAATGGCCCAGAAGAG	GCAGCATAGTGAGCCCAGAANRG	GCAGCATAGTGAGCCCAGAANRG				0	0	0	0	46.36	0	0	0	TAGTGCTGCACAATGGCCCAGAAGAGGTT	0.0795632	0
RNA	1	chr2	60499304	-	3	CCAGCACTGTG-GCCCAGAAGGG	CCAGCACTGTGGCCCAGAAGGG	GCAGCATAGTGAGCCCAGAANRG	GCAGCATAGTGAGCCCAGAANRG				0	0	0	0	46.47	0	0	0	GCCTCCAGCACTGTGGCCCAGAAGGGTAT	0.115208	0
RNA	1	chr2	31640691	+	3	GCAGCATAGTG-CCACTGAACAG	GCAGCATAGTGCCACTGAACAG	GCAGCATAGTGAGCCCAGAANRG	GCAGCATAGTGAGCCCAGAANRG				0	0	0	0	41.09	0	0	0	CCTGCAGCATAGTGCCACTGAACAGCCAC	0.141771	0
RNA	1	chr2	15744947	-	2	GCAGCAGAGTG-GCCGAGAAAAG	GCAGCAGAGTGGCCGAGAAAAG	GCAGCATAGTGAGCCCAGAANRG	GCAGCATAGTGAGCCCAGAANRG				0	0	0	0	44.56	0	0	0	GTGAGCAGCAGAGTGGCCGAGAAAAGTGT	0.180183	0
RNA	1	chr2	132467751	+	2	GGAACATAGTG-GCCCAGAACAG	GGAACATAGTGGCCCAGAACAG	GCAGCATAGTGAGCCCAGAANRG	GCAGCATAGTGAGCCCAGAANRG				0	0	0	0	46.79	0	0	0	CAGGGAACATAGTGGCCCAGAACAGTTAG	0.178107	0
DNA	1	chr2	32715393	-	3	ACAGAATAGAGAGCCCAGGAACAG	ACAGAATAGAGAGCCCAGGAACAG	GCAGCATAGTGAGCCCA-GAANRG	GCAGCATAGTGAGCCCAGAANRG				0	0	0	0	42.89	0	0	0	GAACAGAATAGAGAGCCCAGGAACAGAGC	0.135763	0
DNA	1	chr2	19689813	+	3	GAAGCAGAGTGTGCCCAGGAATGG	GAAGCAGAGTGTGCCCAGGAATGG	GCAGCATAGTGAGCCCA-GAANRG	GCAGCATAGTGAGCCCAGAANRG				0	0	0	0	42.54	0	0	0	AGAGAAGCAGAGTGTGCCCAGGAATGGCC	0.232704	0
DNA	1	chr2	8538274	-	3	GGAGCATAGTGAGGCCAGGACAGG	GGAGCATAGTGAGGCCAGGACAGG	GCAGCATAGTGAGCCCA-GAANRG	GCAGCATAGTGAGCCCAGAANRG				0	0	0	0	42.27	0	0	0	AGGGAGCATAGTGAGGCCAGGACAGGGAG	0.1926	0
RNA	1	chr2	119286459	+	2	GCAGCATGGTGTGCCCAG-AGAG	GCAGCATGGTGTGCCCAGAGAG	GCAGCATAGTGAGCCCAGAANRG	GCAGCATAGTGAGCCCAGAANRG				0	0	0	0	41.82	0	0	0	GTGGCAGCATGGTGTGCCCAGAGAGAACA	0.491861	0
RNA	1	chr2	165476190	-	2	GCAGAA-AGTGAGCCCAGAGCAG	GCAGAAAGTGAGCCCAGAGCAG	GCAGCATAGTGAGCCCAGAANRG	GCAGCATAGTGAGCCCAGAANRG				0	0	0	0	41.47	0	0	0	AATGGCAGAAAGTGAGCCCAGAGCAGCAC	0.230279	0
RNA	1	chr2	219752464	-	2	GTAGCA-AGTGGGCCCAGAAAGG	GTAGCAAGTGGGCCCAGAAAGG	GCAGCATAGTGAGCCCAGAANRG	GCAGCATAGTGAGCCCAGAANRG				0	0	0	0	46.73	0	0	0	TGCAGTAGCAAGTGGGCCCAGAAAGGGCT	0.298131	0
DNA	1	chr2	216853348	+	3	GCAGCATAGGGGAGCACATAAAAG	GCAGCATAGGGGAGCACATAAAAG	GCAGCATAG-TGAGCCCAGAANRG	GCAGCATAGTGAGCCCAGAANRG				0	0	0	0	39.2	0	0	0	TCTGCAGCATAGGGGAGCACATAAAAGAA	0.089971	0
DNA	1	chr1	230823773	+	3	GCAGCATAGAGACCCACAGAGGGG	GCAGCATAGAGACCCACAGAGGGG	GCAGCATAGTGAGCC-CAGAANRG	GCAGCATAGTGAGCCCAGAANRG				0	0	0	0	43.8	0	0	0	TCTGCAGCATAGAGACCCACAGAGGGGAC	0.175279	0
DNA	1	chr1	220929476	+	3	GTAGCATAGTGAGCAACAGAGTGG	GTAGCATAGTGAGCAACAGAGTGG	GCAGCATAGTGAGCC-CAGAANRG	GCAGCATAGTGAGCCCAGAANRG				0	0	0	0	43.37	0	0	0	AAGGTAGCATAGTGAGCAACAGAGTGGAC	0.154411	0
DNA	1	chr1	145040768	-	3	GGAGCATGGTGGAGCCCAGAGGAG	GGAGCATGGTGGAGCCCAGAGGAG	GCAGCATAGT-GAGCCCAGAANRG	GCAGCATAGTGAGCCCAGAANRG				0	0	0	0	46.6	0	0	0	CTGGAGCATGGTGGAGCCCAGAGGAGCAA	0.143184	0
DNA	1	chr1	144027158	+	3	GGAGCATGGTGGAGCCCAGAGGAG	GGAGCATGGTGGAGCCCAGAGGAG	GCAGCATAGT-GAGCCCAGAANRG	GCAGCATAGTGAGCCCAGAANRG				0	0	0	0	46.6	0	0	0	GCTGGAGCATGGTGGAGCCCAGAGGAGCA	0.156683	0
DNA	1	chr1	121239572	+	3	GGAGCATGGTGGAGCCCAGAGGAG	GGAGCATGGTGGAGCCCAGAGGAG	GCAGCATAGT-GAGCCCAGAANRG	GCAGCATAGTGAGCCCAGAANRG				0	0	0	0	46.6	0	0	0	GCTGGAGCATGGTGGAGCCCAGAGGAGCA	0.156683	0
DNA	1	chr1	89610604	-	3	GCAGCATGGTTGGGCACAGAAGGG	GCAGCATGGTTGGGCACAGAAGGG	GCAGCATAGT-GAGCCCAGAANRG	GCAGCATAGTGAGCCCAGAANRG				0	0	0	0	43.33	0	0	0	GGGCAGCATGGTTGGGCACAGAAGGGCAC	0.186493	0
DNA	1	chr1	61437132	-	3	GCAGCATAGTCCAGCCCTGGAGGG	GCAGCATAGTCCAGCCCTGGAGGG	GCAGCATAGT-GAGCCCAGAANRG	GCAGCATAGTGAGCCCAGAANRG				0	0	0	0	36.2	0	0	0	ATGCAGCATAGTCCAGCCCTGGAGGGCAG	0.18623	0
DNA	1	chr1	22652606	+	3	GCAGAAGAGATGAGCCCAGAAAGG	GCAGAAGAGATGAGCCCAGAAAGG	GCAGCATAGT-GAGCCCAGAANRG	GCAGCATAGTGAGCCCAGAANRG				0	0	0	0	46.08	0	0	0	GAAGCAGAAGAGATGAGCCCAGAAAGGGG	0.118024	0
DNA	1	chr1	9332442	+	3	GCAGCATTGTAGAGGCCAGGAGGG	GCAGCATTGTAGAGGCCAGGAGGG	GCAGCATAGT-GAGCCCAGAANRG	GCAGCATAGTGAGCCCAGAANRG				0	0	0	0	38.83	0	0	0	TTGGCAGCATTGTAGAGGCCAGGAGGGGG	0.138739	0
DNA	1	chr1	30878784	+	3	GCAGCCTGGGTGAGCCCAGAAGGG	GCAGCCTGGGTGAGCCCAGAAGGG	GCAGCATAGT-GAGCCCAGAANRG	GCAGCATAGTGAGCCCAGAANRG				0	0	0	0	46.02	0	0	0	CTGGCAGCCTGGGTGAGCCCAGAAGGGCG	0.194511	0
DNA	1	chr1	61208337	+	3	CCAGGCAGAGTGAGCTCAGAAGAG	CCAGGCAGAGTGAGCTCAGAAGAG	GCA-GCATAGTGAGCCCAGAANRG	GCAGCATAGTGAGCCCAGAANRG				0	0	0	0	44.84	0	0	0	ATGCCAGGCAGAGTGAGCTCAGAAGAGGA	0.124997	0
DNA	1	chr1	7791020	-	3	GCTTGCACTGTGAGCCCAGAAAAG	GCTTGCACTGTGAGCCCAGAAAAG	GCA-GCATAGTGAGCCCAGAANRG	GCAGCATAGTGAGCCCAGAANRG				0	0	0	0	46.76	0	0	0	AAGCTTGCACTGTGAGCCCAGAAAAGCCA	0.1705	0
DNA	1	chr1	167882731	+	3	CCCAGCATAGTGAGCTCAGACGGG	CCCAGCATAGTGAGCTCAGACGGG	G-CAGCATAGTGAGCCCAGAANRG	GCAGCATAGTGAGCCCAGAANRG				0	0	0	0	45.15	0	0	0	TAGCCCAGCATAGTGAGCTCAGACGGGGA	0.22991	0
DNA	1	chr1	150835507	+	3	GGCAGATTACTGAGCCCAGAAGAG	GGCAGATTACTGAGCCCAGAAGAG	G-CAGCATAGTGAGCCCAGAANRG	GCAGCATAGTGAGCCCAGAANRG				0	0	0	0	46.63	0	0	0	GCAGGCAGATTACTGAGCCCAGAAGAGTT	0.0771329	0
DNA	1	chr1	104518159	+	3	AACAGAATAGAGAGCCCAGAAAGG	AACAGAATAGAGAGCCCAGAAAGG	G-CAGCATAGTGAGCCCAGAANRG	GCAGCATAGTGAGCCCAGAANRG				0	0	0	0	46.54	0	0	0	TAGAACAGAATAGAGAGCCCAGAAAGGAA	0.0620014	0
DNA	1	chr1	89849958	-	2	GACAACATTGTGAGCCCAGAATAG	GACAACATTGTGAGCCCAGAATAG	G-CAGCATAGTGAGCCCAGAANRG	GCAGCATAGTGAGCCCAGAANRG				0	0	0	0	47.03	0	0	0	GAGACAACATTGTGAGCCCAGAATAGGGG	0.373305	0
DNA	1	chr1	54594277	-	3	GACAGAATGGTGAGACCAGAATGG	GACAGAATGGTGAGACCAGAATGG	G-CAGCATAGTGAGCCCAGAANRG	GCAGCATAGTGAGCCCAGAANRG				0	0	0	0	45.11	0	0	0	GTGACAGAATGGTGAGACCAGAATGGTGA	0.294285	0
DNA	1	chr1	59962330	+	3	GCAGCAAAGGGAAGCCCAGGATGG	GCAGCAAAGGGAAGCCCAGGATGG	GCAGCATAGTGA-GCCCAGAANRG	GCAGCATAGTGAGCCCAGAANRG				0	0	0	0	39.87	0	0	0	ACAGCAGCAAAGGGAAGCCCAGGATGGCA	0.122799	0
DNA	1	chr1	159910957	+	3	GCAGCATGGGGAGGCCCAGCAGGG	GCAGCATGGGGAGGCCCAGCAGGG	GCAGCATAGTGA-GCCCAGAANRG	GCAGCATAGTGAGCCCAGAANRG				0	0	0	0	39.83	0	0	0	CAGGCAGCATGGGGAGGCCCAGCAGGGTA	0.150871	0
RNA	1	chr1	55616384	+	2	GCAGCA-ATTGAGGCCAGAAAAG	GCAGCAATTGAGGCCAGAAAAG	GCAGCATAGTGAGCCCAGAANRG	GCAGCATAGTGAGCCCAGAANRG				0	0	0	0	46.01	0	0	0	AAAGCAGCAATTGAGGCCAGAAAAGGTGA	0.162806	0
RNA	1	chr1	37952471	-	3	GCAGCA-AATGAGACCAGATCAG	GCAGCAAATGAGACCAGATCAG	GCAGCATAGTGAGCCCAGAANRG	GCAGCATAGTGAGCCCAGAANRG				0	0	0	0	40.01	0	0	0	GTTGGCAGCAAATGAGACCAGATCAGAGT	0.0690134	0
RNA	1	chr1	34043354	-	3	GCTGAA-AGTGAGCCCTGAAAAG	GCTGAAAGTGAGCCCTGAAAAG	GCAGCATAGTGAGCCCAGAANRG	GCAGCATAGTGAGCCCAGAANRG				0	0	0	0	44.32	0	0	0	TGATGCTGAAAGTGAGCCCTGAAAAGCTA	0.0499014	0
RNA	1	chr1	11422433	+	3	ACAGCA-AGTGGGCCCTGAATGG	ACAGCAAGTGGGCCCTGAATGG	GCAGCATAGTGAGCCCAGAANRG	GCAGCATAGTGAGCCCAGAANRG				0	0	0	0	43.74	0	0	0	AAGACAGCAAGTGGGCCCTGAATGGAAAG	0.130649	0
RNA	1	chr1	7509032	-	3	GCAGCC-AGGGAGCCCAGGACAG	GCAGCCAGGGAGCCCAGGACAG	GCAGCATAGTGAGCCCAGAANRG	GCAGCATAGTGAGCCCAGAANRG				0	0	0	0	41.95	0	0	0	CACAGCAGCCAGGGAGCCCAGGACAGACC	0.0931156	0
RNA	1	chr1	5381284	+	3	CCAGAA-AGAGAGCCCAGAAGGG	CCAGAAAGAGAGCCCAGAAGGG	GCAGCATAGTGAGCCCAGAANRG	GCAGCATAGTGAGCCCAGAANRG				0	0	0	0	46.85	0	0	0	AAACCAGAAAGAGAGCCCAGAAGGGCTGG	0.133216	0
RNA	1	chr1	72648378	-	3	GCTGCA-ACTGTGCCCAGAAGGG	GCTGCAACTGTGCCCAGAAGGG	GCAGCATAGTGAGCCCAGAANRG	GCAGCATAGTGAGCCCAGAANRG				0	0	0	0	46.36	0	0	0	GGCAGCTGCAACTGTGCCCAGAAGGGCGG	0.0939056	0
RNA	1	chr1	83088112	-	3	GCAGCA-CTTTAGCCCAGAACAG	GCAGCACTTTAGCCCAGAACAG	GCAGCATAGTGAGCCCAGAANRG	GCAGCATAGTGAGCCCAGAANRG				0	0	0	0	46.34	0	0	0	TGAGGCAGCACTTTAGCCCAGAACAGTTA	0.0893708	0
RNA	1	chr1	164868327	+	2	GCAGCT-AGTGAGCCCAGAGGAG	GCAGCTAGTGAGCCCAGAGGAG	GCAGCATAGTGAGCCCAGAANRG	GCAGCATAGTGAGCCCAGAANRG				0	0	0	0	41.45	0	0	0	TAGGCAGCTAGTGAGCCCAGAGGAGCAGG	0.205557	0
RNA	1	chr1	85297255	-	3	GAAGCA-AGGGAGGCCAGAAGGG	GAAGCAAGGGAGGCCAGAAGGG	GCAGCATAGTGAGCCCAGAANRG	GCAGCATAGTGAGCCCAGAANRG				0	0	0	0	45.73	0	0	0	GAAAGAAGCAAGGGAGGCCAGAAGGGAGA	0.132012	0
RNA	1	chr1	234309448	+	3	GCAGAA-AATGAGCCCAGCAGAG	GCAGAAAATGAGCCCAGCAGAG	GCAGCATAGTGAGCCCAGAANRG	GCAGCATAGTGAGCCCAGAANRG				0	0	0	0	42.12	0	0	0	GCAGCAGAAAATGAGCCCAGCAGAGGGCC	0.141965	0
RNA	1	chr1	229810560	+	3	ACAGCA-AGAGAGCACAGAAAAG	ACAGCAAGAGAGCACAGAAAAG	GCAGCATAGTGAGCCCAGAANRG	GCAGCATAGTGAGCCCAGAANRG				0	0	0	0	45.14	0	0	0	ATTACAGCAAGAGAGCACAGAAAAGTTGG	0.146255	0
RNA	1	chr1	204343574	+	3	TAAACA-AGTGAGCCCAGAAAAG	TAAACAAGTGAGCCCAGAAAAG	GCAGCATAGTGAGCCCAGAANRG	GCAGCATAGTGAGCCCAGAANRG				0	0	0	0	47.24	0	0	0	TGATAAACAAGTGAGCCCAGAAAAGGATG	0.142485	0
RNA	1	chr1	200895945	+	3	GCAGCA-AGTCATCCCAGAGAGG	GCAGCAAGTCATCCCAGAGAGG	GCAGCATAGTGAGCCCAGAANRG	GCAGCATAGTGAGCCCAGAANRG				0	0	0	0	39.86	0	0	0	GGGGCAGCAAGTCATCCCAGAGAGGACCC	0.140416	0
RNA	1	chr1	154902343	+	3	CCAGCAT-GTTAGCACAGAATAG	CCAGCATGTTAGCACAGAATAG	GCAGCATAGTGAGCCCAGAANRG	GCAGCATAGTGAGCCCAGAANRG				0	0	0	0	44.9	0	0	0	TAACCAGCATGTTAGCACAGAATAGCCAC	0.121761	0
RNA	1	chr1	153386547	-	3	GCAACAT-TTGAGCCCACAAAGG	GCAACATTTGAGCCCACAAAGG	GCAGCATAGTGAGCCCAGAANRG	GCAGCATAGTGAGCCCAGAANRG				0	0	0	0	43.1	0	0	0	GCATGCAACATTTGAGCCCACAAAGGAGT	0.127023	0
RNA	1	chr1	145773644	-	3	GCAGTAT-GTGTGCTCAGAAAAG	GCAGTATGTGTGCTCAGAAAAG	GCAGCATAGTGAGCCCAGAANRG	GCAGCATAGTGAGCCCAGAANRG				0	0	0	0	44.73	0	0	0	CAGGGCAGTATGTGTGCTCAGAAAAGACC	0.063447	0
RNA	1	chr1	99642184	-	3	GCACAAT-TTGAGCCCAGAAAAG	GCACAATTTGAGCCCAGAAAAG	GCAGCATAGTGAGCCCAGAANRG	GCAGCATAGTGAGCCCAGAANRG				0	0	0	0	46.91	0	0	0	TATTGCACAATTTGAGCCCAGAAAAGTAT	0.0989509	0
RNA	1	chr1	83088112	-	3	GCAGCAC-TTTAGCCCAGAACAG	GCAGCACTTTAGCCCAGAACAG	GCAGCATAGTGAGCCCAGAANRG	GCAGCATAGTGAGCCCAGAANRG				0	0	0	0	46.34	0	0	0	TGAGGCAGCACTTTAGCCCAGAACAGTTA	0.0893708	0
RNA	1	chr1	55616384	+	3	GCAGCAA-TTGAGGCCAGAAAAG	GCAGCAATTGAGGCCAGAAAAG	GCAGCATAGTGAGCCCAGAANRG	GCAGCATAGTGAGCCCAGAANRG				0	0	0	0	45.74	0	0	0	AAAGCAGCAATTGAGGCCAGAAAAGGTGA	0.162806	0
RNA	1	chr1	44346625	+	3	ACAGCAT-CTGATCCCAGAAGAG	ACAGCATCTGATCCCAGAAGAG	GCAGCATAGTGAGCCCAGAANRG	GCAGCATAGTGAGCCCAGAANRG				0	0	0	0	46.05	0	0	0	TAGACAGCATCTGATCCCAGAAGAGAGGT	0.150422	0
RNA	1	chr1	38564589	+	3	GCAGGAT-GTGGGCACAGAAGGG	GCAGGATGTGGGCACAGAAGGG	GCAGCATAGTGAGCCCAGAANRG	GCAGCATAGTGAGCCCAGAANRG				0	0	0	0	44.73	0	0	0	GGTGCAGGATGTGGGCACAGAAGGGTCAC	0.119037	0
RNA	1	chr1	37622154	+	3	GCATCAT-GGGAGCCCAGAGAAG	GCATCATGGGAGCCCAGAGAAG	GCAGCATAGTGAGCCCAGAANRG	GCAGCATAGTGAGCCCAGAANRG				0	0	0	0	40.95	0	0	0	ATAGCATCATGGGAGCCCAGAGAAGAGTA	0.149233	0
RNA	1	chr1	36534411	-	3	GCACCGT-GGGAGCCCAGAAGAG	GCACCGTGGGAGCCCAGAAGAG	GCAGCATAGTGAGCCCAGAANRG	GCAGCATAGTGAGCCCAGAANRG				0	0	0	0	46.74	0	0	0	CAGAGCACCGTGGGAGCCCAGAAGAGAGA	0.0663991	0
RNA	1	chr1	33061115	-	3	GCAGCAT-CTGAGCCCTGAGTGG	GCAGCATCTGAGCCCTGAGTGG	GCAGCATAGTGAGCCCAGAANRG	GCAGCATAGTGAGCCCAGAANRG				0	0	0	0	38.27	0	0	0	CATGGCAGCATCTGAGCCCTGAGTGGATT	0.123408	0
RNA	1	chr1	29807587	+	3	ACAGCAT-GTCAGCCCAGGAGGG	ACAGCATGTCAGCCCAGGAGGG	GCAGCATAGTGAGCCCAGAANRG	GCAGCATAGTGAGCCCAGAANRG				0	0	0	0	41.8	0	0	0	AATACAGCATGTCAGCCCAGGAGGGTGTC	0.124805	0
RNA	1	chr1	164868327	+	3	GCAGCTA-GTGAGCCCAGAGGAG	GCAGCTAGTGAGCCCAGAGGAG	GCAGCATAGTGAGCCCAGAANRG	GCAGCATAGTGAGCCCAGAANRG				0	0	0	0	41.18	0	0	0	TAGGCAGCTAGTGAGCCCAGAGGAGCAGG	0.205557	0
RNA	1	chr1	185649748	+	3	GCAGCTT-GTAAGCCCAGCATAG	GCAGCTTGTAAGCCCAGCATAG	GCAGCATAGTGAGCCCAGAANRG	GCAGCATAGTGAGCCCAGAANRG				0	0	0	0	41.71	0	0	0	CCTGCAGCTTGTAAGCCCAGCATAGTTCA	0.112855	0
RNA	1	chr1	204424840	-	3	GCACCTT-GTGAGCCCAGCAGAG	GCACCTTGTGAGCCCAGCAGAG	GCAGCATAGTGAGCCCAGAANRG	GCAGCATAGTGAGCCCAGAANRG				0	0	0	0	42.24	0	0	0	CATGGCACCTTGTGAGCCCAGCAGAGCCA	0.0397217	0
RNA	1	chr1	228141706	+	3	GCAGCAT-GGGAGCCCAGTCCAG	GCAGCATGGGAGCCCAGTCCAG	GCAGCATAGTGAGCCCAGAANRG	GCAGCATAGTGAGCCCAGAANRG				0	0	0	0	36.12	0	0	0	GGGGCAGCATGGGAGCCCAGTCCAGGGAG	0.154769	0
RNA	1	chr1	239875523	-	3	GCAGCCT-GTGAGCTGAGAATGG	GCAGCCTGTGAGCTGAGAATGG	GCAGCATAGTGAGCCCAGAANRG	GCAGCATAGTGAGCCCAGAANRG				0	0	0	0	43.21	0	0	0	TTGTGCAGCCTGTGAGCTGAGAATGGTTT	0.0796955	0
RNA	1	chr1	232376834	-	3	GCACCAT-GTGAGCCCATGAGAG	GCACCATGTGAGCCCATGAGAG	GCAGCATAGTGAGCCCAGAANRG	GCAGCATAGTGAGCCCAGAANRG				0	0	0	0	38.45	0	0	0	GCTGGCACCATGTGAGCCCATGAGAGCCA	0.0625742	0
RNA	1	chr1	226414875	-	3	GGAGCAGAGTGAGCC-AGCAGGG	GGAGCAGAGTGAGCCAGCAGGG	GCAGCATAGTGAGCCCAGAANRG	GCAGCATAGTGAGCCCAGAANRG				0	0	0	0	40.23	0	0	0	GTGGGGAGCAGAGTGAGCCAGCAGGGACT	0.102218	0
RNA	1	chr1	226414875	-	3	GGAGCAGAGTGAGC-CAGCAGGG	GGAGCAGAGTGAGCCAGCAGGG	GCAGCATAGTGAGCCCAGAANRG	GCAGCATAGTGAGCCCAGAANRG				0	0	0	0	40.63	0	0	0	GTGGGGAGCAGAGTGAGCCAGCAGGGACT	0.102218	0
RNA	1	chr1	226414875	-	3	GGAGCAGAGTGAG-CCAGCAGGG	GGAGCAGAGTGAGCCAGCAGGG	GCAGCATAGTGAGCCCAGAANRG	GCAGCATAGTGAGCCCAGAANRG				0	0	0	0	41.23	0	0	0	GTGGGGAGCAGAGTGAGCCAGCAGGGACT	0.102218	0
RNA	1	chr1	181033576	+	3	GCATCATAGGGAGCC-AGAGCAG	GCATCATAGGGAGCCAGAGCAG	GCAGCATAGTGAGCCCAGAANRG	GCAGCATAGTGAGCCCAGAANRG				0	0	0	0	38.92	0	0	0	TCAGCATCATAGGGAGCCAGAGCAGGGAG	0.140823	0
RNA	1	chr1	181033576	+	3	GCATCATAGGGAGC-CAGAGCAG	GCATCATAGGGAGCCAGAGCAG	GCAGCATAGTGAGCCCAGAANRG	GCAGCATAGTGAGCCCAGAANRG				0	0	0	0	39.32	0	0	0	TCAGCATCATAGGGAGCCAGAGCAGGGAG	0.140823	0
RNA	1	chr1	181033576	+	3	GCATCATAGGGAG-CCAGAGCAG	GCATCATAGGGAGCCAGAGCAG	GCAGCATAGTGAGCCCAGAANRG	GCAGCATAGTGAGCCCAGAANRG				0	0	0	0	39.92	0	0	0	TCAGCATCATAGGGAGCCAGAGCAGGGAG	0.140823	0
RNA	1	chr1	158447557	+	3	GCAGCATAGTGAGGC-TGGATGG	GCAGCATAGTGAGGCTGGATGG	GCAGCATAGTGAGCCCAGAANRG	GCAGCATAGTGAGCCCAGAANRG				0	0	0	0	36.29	0	0	0	ATGGCAGCATAGTGAGGCTGGATGGACTG	0.2679	0
RNA	1	chr1	158447557	+	3	GCAGCATAGTGAGG-CTGGATGG	GCAGCATAGTGAGGCTGGATGG	GCAGCATAGTGAGCCCAGAANRG	GCAGCATAGTGAGCCCAGAANRG				0	0	0	0	36.69	0	0	0	ATGGCAGCATAGTGAGGCTGGATGGACTG	0.2679	0
DNA	1	chr1	190993187	+	3	GCAGCACAATGCAGCCCATAAAAG	GCAGCACAATGCAGCCCATAAAAG	GCAGCATAGTG-AGCCCAGAANRG	GCAGCATAGTGAGCCCAGAANRG				0	0	0	0	41.32	0	0	0	AGGGCAGCACAATGCAGCCCATAAAAGAG	0.120506	0
DNA	1	chr1	145040768	-	3	GGAGCATGGTGGAGCCCAGAGGAG	GGAGCATGGTGGAGCCCAGAGGAG	GCAGCATAGTG-AGCCCAGAANRG	GCAGCATAGTGAGCCCAGAANRG				0	0	0	0	46.5	0	0	0	CTGGAGCATGGTGGAGCCCAGAGGAGCAA	0.143184	0
DNA	1	chr1	144027158	+	3	GGAGCATGGTGGAGCCCAGAGGAG	GGAGCATGGTGGAGCCCAGAGGAG	GCAGCATAGTG-AGCCCAGAANRG	GCAGCATAGTGAGCCCAGAANRG				0	0	0	0	46.5	0	0	0	GCTGGAGCATGGTGGAGCCCAGAGGAGCA	0.156683	0
DNA	1	chr1	121239572	+	3	GGAGCATGGTGGAGCCCAGAGGAG	GGAGCATGGTGGAGCCCAGAGGAG	GCAGCATAGTG-AGCCCAGAANRG	GCAGCATAGTGAGCCCAGAANRG				0	0	0	0	46.5	0	0	0	GCTGGAGCATGGTGGAGCCCAGAGGAGCA	0.156683	0
DNA	1	chr1	61437132	-	3	GCAGCATAGTCCAGCCCTGGAGGG	GCAGCATAGTCCAGCCCTGGAGGG	GCAGCATAGTG-AGCCCAGAANRG	GCAGCATAGTGAGCCCAGAANRG				0	0	0	0	36.2	0	0	0	ATGCAGCATAGTCCAGCCCTGGAGGGCAG	0.18623	0
DNA	1	chr1	59962330	+	3	GCAGCAAAGGGAAGCCCAGGATGG	GCAGCAAAGGGAAGCCCAGGATGG	GCAGCATAGTG-AGCCCAGAANRG	GCAGCATAGTGAGCCCAGAANRG				0	0	0	0	40.17	0	0	0	ACAGCAGCAAAGGGAAGCCCAGGATGGCA	0.122799	0
RNA	1	chr1	202603544	+	3	GGAGCAGAGTGAGCCCAC-AGAG	GGAGCAGAGTGAGCCCACAGAG	GCAGCATAGTGAGCCCAGAANRG	GCAGCATAGTGAGCCCAGAANRG				0	0	0	0	38.53	0	0	0	ACAGGAGCAGAGTGAGCCCACAGAGGTGG	0.340962	0
RNA	1	chr1	167882732	+	2	CCAGCATAGTGAGCTCAG-ACGG	CCAGCATAGTGAGCTCAGACGG	GCAGCATAGTGAGCCCAGAANRG	GCAGCATAGTGAGCCCAGAANRG				0	0	0	0	40.87	0	0	0	AGCCCAGCATAGTGAGCTCAGACGGGGAT	0.524341	0
RNA	1	chr1	162639306	+	3	ACAGAATAGAGAGCCCAG-ATAG	ACAGAATAGAGAGCCCAGATAG	GCAGCATAGTGAGCCCAGAANRG	GCAGCATAGTGAGCCCAGAANRG				0	0	0	0	42.08	0	0	0	AAAACAGAATAGAGAGCCCAGATAGACCC	0.26844	0
RNA	1	chr1	158447557	+	3	GCAGCATAGTGAGGCTGG-ATGG	GCAGCATAGTGAGGCTGGATGG	GCAGCATAGTGAGCCCAGAANRG	GCAGCATAGTGAGCCCAGAANRG				0	0	0	0	36.29	0	0	0	ATGGCAGCATAGTGAGGCTGGATGGACTG	0.2679	0
RNA	1	chr1	104518160	+	3	ACAGAATAGAGAGCCCAG-AAAG	ACAGAATAGAGAGCCCAGAAAG	GCAGCATAGTGAGCCCAGAANRG	GCAGCATAGTGAGCCCAGAANRG				0	0	0	0	42.08	0	0	0	AGAACAGAATAGAGAGCCCAGAAAGGAAT	0.46213	0
RNA	1	chr1	84474957	-	3	ACAGAATAGAGAGCCCAG-AAAG	ACAGAATAGAGAGCCCAGAAAG	GCAGCATAGTGAGCCCAGAANRG	GCAGCATAGTGAGCCCAGAANRG				0	0	0	0	42.08	0	0	0	TAAAACAGAATAGAGAGCCCAGAAAGAAA	0.0668852	0
RNA	1	chr1	47633847	+	3	GTAGCATAGAGAGCTCAG-AAGG	GTAGCATAGAGAGCTCAGAAGG	GCAGCATAGTGAGCCCAGAANRG	GCAGCATAGTGAGCCCAGAANRG				0	0	0	0	40.36	0	0	0	GAAGTAGCATAGAGAGCTCAGAAGGCTTC	0.498076	0
RNA	1	chr1	35807128	-	3	GCAGCATGGTCAGCCCAG-CAGG	GCAGCATGGTCAGCCCAGCAGG	GCAGCATAGTGAGCCCAGAANRG	GCAGCATAGTGAGCCCAGAANRG				0	0	0	0	35.92	0	0	0	CAAGGCAGCATGGTCAGCCCAGCAGGCAC	0.140889	0
RNA	1	chr1	2077399	+	3	GCCGCATCGTGGGCCCAG-ATGG	GCCGCATCGTGGGCCCAGATGG	GCAGCATAGTGAGCCCAGAANRG	GCAGCATAGTGAGCCCAGAANRG				0	0	0	0	41.67	0	0	0	TCAGCCGCATCGTGGGCCCAGATGGCTTC	0.273129	0
DNA	1	chr1	208941697	-	3	GGAGCATATTGATCCCAAGAAAAG	GGAGCATATTGATCCCAAGAAAAG	GCAGCATAGTGAGCCCA-GAANRG	GCAGCATAGTGAGCCCAGAANRG				0	0	0	0	42.12	0	0	0	TAGGAGCATATTGATCCCAAGAAAAGCCG	0.0877533	0
DNA	1	chr1	69490299	+	3	ACAGAATAGAGAGCCCAGGAATAG	ACAGAATAGAGAGCCCAGGAATAG	GCAGCATAGTGAGCCCA-GAANRG	GCAGCATAGTGAGCCCAGAANRG				0	0	0	0	42.89	0	0	0	GGAACAGAATAGAGAGCCCAGGAATAGAC	0.282746	0
DNA	1	chr1	37142390	+	3	GAAGCAGAGTGAGACCATGAAGGG	GAAGCAGAGTGAGACCATGAAGGG	GCAGCATAGTGAGCCCA-GAANRG	GCAGCATAGTGAGCCCAGAANRG				0	0	0	0	42.04	0	0	0	GGGGAAGCAGAGTGAGACCATGAAGGGCC	0.052842	0
DNA	1	chr1	72819598	+	3	GCAGAATAGAGAGCCCAGAAATAG	GCAGAATAGAGAGCCCAGAAATAG	GCAGCATAGTGAGCCCA-GAANRG	GCAGCATAGTGAGCCCAGAANRG				0	0	0	0	38.01	0	0	0	GTGGCAGAATAGAGAGCCCAGAAATAGGG	0.680575	0
RNA	1	chr1	112034845	+	3	GCAGAATAGTAAACC-AGAAAGG	GCAGAATAGTAAACCAGAAAGG	GCAGCATAGTGAGCCCAGAANRG	GCAGCATAGTGAGCCCAGAANRG				0	0	0	0	43.6	0	0	0	GTAGCAGAATAGTAAACCAGAAAGGGACC	0.164619	0
DNA	1	chr13	61766179	+	2	GCAGCATGGGTGAGCCCAGAAAAG	GCAGCATGGGTGAGCCCAGAAAAG	GCAGCATAGT-GAGCCCAGAANRG	GCAGCATAGTGAGCCCAGAANRG				0	0	0	0	46.23	0	0	0	TGGGCAGCATGGGTGAGCCCAGAAAAGAC	0.152124	0
DNA	1	chr13	99588470	-	3	GCAGCAGAGTGAGACCCTGAAAAG	GCAGCAGAGTGAGACCCTGAAAAG	GCAGCATAGTGAGCC-CAGAANRG	GCAGCATAGTGAGCCCAGAANRG				0	0	0	0	39.87	0	0	0	GGGCAGCAGAGTGAGACCCTGAAAAGAAA	0.304878	0
DNA	1	chr13	99435453	-	3	GGAGCAAACTGAAGCCCAGAATGG	GGAGCAAACTGAAGCCCAGAATGG	GCAGCATAGTG-AGCCCAGAANRG	GCAGCATAGTGAGCCCAGAANRG				0	0	0	0	46.19	0	0	0	GAGGAGCAAACTGAAGCCCAGAATGGGAA	0.135736	0
DNA	1	chr13	61766179	+	3	GCAGCATGGGTGAGCCCAGAAAAG	GCAGCATGGGTGAGCCCAGAAAAG	GCAGCATAGTG-AGCCCAGAANRG	GCAGCATAGTGAGCCCAGAANRG				0	0	0	0	45.43	0	0	0	TGGGCAGCATGGGTGAGCCCAGAAAAGAC	0.152124	0
RNA	1	chr13	82419769	-	3	GCAGCATCCTGAGCC-AGCATAG	GCAGCATCCTGAGCCAGCATAG	GCAGCATAGTGAGCCCAGAANRG	GCAGCATAGTGAGCCCAGAANRG				0	0	0	0	39.97	0	0	0	TTTGGCAGCATCCTGAGCCAGCATAGGCT	0.057683	0
RNA	1	chr13	82419769	-	3	GCAGCATCCTGAGC-CAGCATAG	GCAGCATCCTGAGCCAGCATAG	GCAGCATAGTGAGCCCAGAANRG	GCAGCATAGTGAGCCCAGAANRG				0	0	0	0	40.37	0	0	0	TTTGGCAGCATCCTGAGCCAGCATAGGCT	0.057683	0
RNA	1	chr13	82419769	-	3	GCAGCATCCTGAG-CCAGCATAG	GCAGCATCCTGAGCCAGCATAG	GCAGCATAGTGAGCCCAGAANRG	GCAGCATAGTGAGCCCAGAANRG				0	0	0	0	40.97	0	0	0	TTTGGCAGCATCCTGAGCCAGCATAGGCT	0.057683	0
RNA	1	chr13	82437906	+	3	GCAGCAAAGTGATCA-AGAAGGG	GCAGCAAAGTGATCAAGAAGGG	GCAGCATAGTGAGCCCAGAANRG	GCAGCATAGTGAGCCCAGAANRG				0	0	0	0	42.36	0	0	0	TAAGCAGCAAAGTGATCAAGAAGGGGTCT	0.13696	0
RNA	1	chr13	82437906	+	3	GCAGCAAAGTGATC-AAGAAGGG	GCAGCAAAGTGATCAAGAAGGG	GCAGCATAGTGAGCCCAGAANRG	GCAGCATAGTGAGCCCAGAANRG				0	0	0	0	42.36	0	0	0	TAAGCAGCAAAGTGATCAAGAAGGGGTCT	0.13696	0
RNA	1	chr13	82437906	+	3	GCAGCAAAGTGAT-CAAGAAGGG	GCAGCAAAGTGATCAAGAAGGG	GCAGCATAGTGAGCCCAGAANRG	GCAGCATAGTGAGCCCAGAANRG				0	0	0	0	42.96	0	0	0	TAAGCAGCAAAGTGATCAAGAAGGGGTCT	0.13696	0
RNA	1	chr13	80964915	-	3	GCAGAATAGTGAGCA-TGAATGG	GCAGAATAGTGAGCATGAATGG	GCAGCATAGTGAGCCCAGAANRG	GCAGCATAGTGAGCCCAGAANRG				0	0	0	0	40.5	0	0	0	GGTAGCAGAATAGTGAGCATGAATGGGAA	0.085695	0
RNA	1	chr13	80964915	-	3	GCAGAATAGTGAGC-ATGAATGG	GCAGAATAGTGAGCATGAATGG	GCAGCATAGTGAGCCCAGAANRG	GCAGCATAGTGAGCCCAGAANRG				0	0	0	0	40.5	0	0	0	GGTAGCAGAATAGTGAGCATGAATGGGAA	0.085695	0
RNA	1	chr13	80964915	-	3	GCAGAATAGTGAG-CATGAATGG	GCAGAATAGTGAGCATGAATGG	GCAGCATAGTGAGCCCAGAANRG	GCAGCATAGTGAGCCCAGAANRG				0	0	0	0	41.1	0	0	0	GGTAGCAGAATAGTGAGCATGAATGGGAA	0.085695	0
RNA	1	chr13	69761163	+	2	GCAGCATAATGAACC-AGAATAG	GCAGCATAATGAACCAGAATAG	GCAGCATAGTGAGCCCAGAANRG	GCAGCATAGTGAGCCCAGAANRG				0	0	0	0	44.14	0	0	0	CTGGCAGCATAATGAACCAGAATAGTTTC	0.191065	0
RNA	1	chr13	69761163	+	2	GCAGCATAATGAAC-CAGAATAG	GCAGCATAATGAACCAGAATAG	GCAGCATAGTGAGCCCAGAANRG	GCAGCATAGTGAGCCCAGAANRG				0	0	0	0	44.54	0	0	0	CTGGCAGCATAATGAACCAGAATAGTTTC	0.191065	0
RNA	1	chr13	69761163	+	2	GCAGCATAATGAA-CCAGAATAG	GCAGCATAATGAACCAGAATAG	GCAGCATAGTGAGCCCAGAANRG	GCAGCATAGTGAGCCCAGAANRG				0	0	0	0	45.14	0	0	0	CTGGCAGCATAATGAACCAGAATAGTTTC	0.191065	0
RNA	1	chr13	42523293	+	3	GCAGCATGGGGACCC-AGAATGG	GCAGCATGGGGACCCAGAATGG	GCAGCATAGTGAGCCCAGAANRG	GCAGCATAGTGAGCCCAGAANRG				0	0	0	0	43.72	0	0	0	GCAGCAGCATGGGGACCCAGAATGGTGGC	0.185527	0
RNA	1	chr13	42523293	+	3	GCAGCATGGGGACC-CAGAATGG	GCAGCATGGGGACCCAGAATGG	GCAGCATAGTGAGCCCAGAANRG	GCAGCATAGTGAGCCCAGAANRG				0	0	0	0	44.12	0	0	0	GCAGCAGCATGGGGACCCAGAATGGTGGC	0.185527	0
RNA	1	chr13	42523293	+	3	GCAGCATGGGGAC-CCAGAATGG	GCAGCATGGGGACCCAGAATGG	GCAGCATAGTGAGCCCAGAANRG	GCAGCATAGTGAGCCCAGAANRG				0	0	0	0	44.72	0	0	0	GCAGCAGCATGGGGACCCAGAATGGTGGC	0.185527	0
RNA	1	chr13	20769320	-	3	GCAGCAAAGGGAGTC-AGAACAG	GCAGCAAAGGGAGTCAGAACAG	GCAGCATAGTGAGCCCAGAANRG	GCAGCATAGTGAGCCCAGAANRG				0	0	0	0	43.56	0	0	0	AGAAGCAGCAAAGGGAGTCAGAACAGATT	0.0800643	0
RNA	1	chr13	20769320	-	3	GCAGCAAAGGGAGT-CAGAACAG	GCAGCAAAGGGAGTCAGAACAG	GCAGCATAGTGAGCCCAGAANRG	GCAGCATAGTGAGCCCAGAANRG				0	0	0	0	43.96	0	0	0	AGAAGCAGCAAAGGGAGTCAGAACAGATT	0.0800643	0
RNA	1	chr13	20769320	-	3	GCAGCAAAGGGAG-TCAGAACAG	GCAGCAAAGGGAGTCAGAACAG	GCAGCATAGTGAGCCCAGAANRG	GCAGCATAGTGAGCCCAGAANRG				0	0	0	0	43.96	0	0	0	AGAAGCAGCAAAGGGAGTCAGAACAGATT	0.0800643	0
DNA	1	chr13	61766179	+	3	GCAGCATGGGTGAGCCCAGAAAAG	GCAGCATGGGTGAGCCCAGAAAAG	GCAGC-ATAGTGAGCCCAGAANRG	GCAGCATAGTGAGCCCAGAANRG				0	0	0	0	46.64	0	0	0	TGGGCAGCATGGGTGAGCCCAGAAAAGAC	0.152124	0
RNA	1	chr13	88684923	-	3	GCAGCATAGTGAG-TTAAAAAGG	GCAGCATAGTGAGTTAAAAAGG	GCAGCATAGTGAGCCCAGAANRG	GCAGCATAGTGAGCCCAGAANRG				0	0	0	0	38.39	0	0	0	ACAAGCAGCATAGTGAGTTAAAAAGGACT	0.179392	0
RNA	1	chr13	88684923	-	3	GCAGCATAGTGAGT-TAAAAAGG	GCAGCATAGTGAGTTAAAAAGG	GCAGCATAGTGAGCCCAGAANRG	GCAGCATAGTGAGCCCAGAANRG				0	0	0	0	38.39	0	0	0	ACAAGCAGCATAGTGAGTTAAAAAGGACT	0.179392	0
RNA	1	chr13	88684923	-	3	GCAGCATAGTGAGTT-AAAAAGG	GCAGCATAGTGAGTTAAAAAGG	GCAGCATAGTGAGCCCAGAANRG	GCAGCATAGTGAGCCCAGAANRG				0	0	0	0	38.39	0	0	0	ACAAGCAGCATAGTGAGTTAAAAAGGACT	0.179392	0
RNA	1	chr13	93183475	-	3	GCAGCAGAGTCAG-CCAGAGGAG	GCAGCAGAGTCAGCCAGAGGAG	GCAGCATAGTGAGCCCAGAANRG	GCAGCATAGTGAGCCCAGAANRG				0	0	0	0	39.66	0	0	0	GGGGGCAGCAGAGTCAGCCAGAGGAGAAG	0.0762532	0
RNA	1	chr13	48736369	+	3	GCAGCAT-GTATGCCCAGATTGG	GCAGCATGTATGCCCAGATTGG	GCAGCATAGTGAGCCCAGAANRG	GCAGCATAGTGAGCCCAGAANRG				0	0	0	0	40.12	0	0	0	ACAGCAGCATGTATGCCCAGATTGGCCCA	0.150407	0
RNA	1	chr13	93183475	-	3	GCAGCAGAGTCAGCC-AGAGGAG	GCAGCAGAGTCAGCCAGAGGAG	GCAGCATAGTGAGCCCAGAANRG	GCAGCATAGTGAGCCCAGAANRG				0	0	0	0	38.66	0	0	0	GGGGGCAGCAGAGTCAGCCAGAGGAGAAG	0.0762532	0
RNA	1	chr13	93183475	-	3	GCAGCAGAGTCAGC-CAGAGGAG	GCAGCAGAGTCAGCCAGAGGAG	GCAGCATAGTGAGCCCAGAANRG	GCAGCATAGTGAGCCCAGAANRG				0	0	0	0	39.06	0	0	0	GGGGGCAGCAGAGTCAGCCAGAGGAGAAG	0.0762532	0
RNA	1	chr13	42523293	+	3	GCAGCAT-GGGGACCCAGAATGG	GCAGCATGGGGACCCAGAATGG	GCAGCATAGTGAGCCCAGAANRG	GCAGCATAGTGAGCCCAGAANRG				0	0	0	0	45.22	0	0	0	GCAGCAGCATGGGGACCCAGAATGGTGGC	0.185527	0
RNA	1	chr13	112459811	-	3	ACAGAATAGAGAGCCCAG-AAAG	ACAGAATAGAGAGCCCAGAAAG	GCAGCATAGTGAGCCCAGAANRG	GCAGCATAGTGAGCCCAGAANRG				0	0	0	0	42.08	0	0	0	TGGAACAGAATAGAGAGCCCAGAAAGAAA	0.067013	0
RNA	1	chr13	109204945	-	3	TCAGCAGAGTGAGCCAAG-AAAG	TCAGCAGAGTGAGCCAAGAAAG	GCAGCATAGTGAGCCCAGAANRG	GCAGCATAGTGAGCCCAGAANRG				0	0	0	0	40.24	0	0	0	ACTCTCAGCAGAGTGAGCCAAGAAAGCAG	0.0555588	0
RNA	1	chr13	99614133	+	3	GCAGGATACAGAGCCCAG-AAGG	GCAGGATACAGAGCCCAGAAGG	GCAGCATAGTGAGCCCAGAANRG	GCAGCATAGTGAGCCCAGAANRG				0	0	0	0	41.85	0	0	0	AGGGCAGGATACAGAGCCCAGAAGGAAAG	0.43171	0
RNA	1	chr13	83906396	-	3	GCAGCACAGGGCGCCCAG-ACAG	GCAGCACAGGGCGCCCAGACAG	GCAGCATAGTGAGCCCAGAANRG	GCAGCATAGTGAGCCCAGAANRG				0	0	0	0	41.36	0	0	0	GTAGGCAGCACAGGGCGCCCAGACAGACG	0.0724637	0
RNA	1	chr13	80543660	+	3	GCAGCATAGTGAGGCCCC-ATGG	GCAGCATAGTGAGGCCCCATGG	GCAGCATAGTGAGCCCAGAANRG	GCAGCATAGTGAGCCCAGAANRG				0	0	0	0	34.59	0	0	0	ACTGCAGCATAGTGAGGCCCCATGGAGAT	0.297021	0
RNA	1	chr13	77420652	-	3	ACAGAATAGAGAGCCCAG-AAAG	ACAGAATAGAGAGCCCAGAAAG	GCAGCATAGTGAGCCCAGAANRG	GCAGCATAGTGAGCCCAGAANRG				0	0	0	0	42.08	0	0	0	TGGAACAGAATAGAGAGCCCAGAAAGAAA	0.067013	0
RNA	1	chr13	58228371	+	3	ACAGAATAGAGAGCCCAG-AAAG	ACAGAATAGAGAGCCCAGAAAG	GCAGCATAGTGAGCCCAGAANRG	GCAGCATAGTGAGCCCAGAANRG				0	0	0	0	42.08	0	0	0	GGAACAGAATAGAGAGCCCAGAAAGGAAT	0.462292	0
RNA	1	chr13	42350321	-	3	GAAGCATAGAGAGCTCAG-AGGG	GAAGCATAGAGAGCTCAGAGGG	GCAGCATAGTGAGCCCAGAANRG	GCAGCATAGTGAGCCCAGAANRG				0	0	0	0	40.36	0	0	0	GACTGAAGCATAGAGAGCTCAGAGGGGTG	0.0927926	0
RNA	1	chr13	25989304	+	3	GCAGCTGAATGAGCCCAG-AAAG	GCAGCTGAATGAGCCCAGAAAG	GCAGCATAGTGAGCCCAGAANRG	GCAGCATAGTGAGCCCAGAANRG				0	0	0	0	42.1	0	0	0	TTTGCAGCTGAATGAGCCCAGAAAGTTTG	0.546101	0
RNA	1	chr13	20991235	-	3	GCAGCATAGTGGGCAAAG-ATGG	GCAGCATAGTGGGCAAAGATGG	GCAGCATAGTGAGCCCAGAANRG	GCAGCATAGTGAGCCCAGAANRG				0	0	0	0	37.89	0	0	0	GCCTGCAGCATAGTGGGCAAAGATGGTTT	0.0912651	0
DNA	1	chr13	99588470	-	3	GCAGCAGAGTGAGACCCTGAAAAG	GCAGCAGAGTGAGACCCTGAAAAG	GCAGCATAGTGAGCCCA-GAANRG	GCAGCATAGTGAGCCCAGAANRG				0	0	0	0	39.17	0	0	0	GGGCAGCAGAGTGAGACCCTGAAAAGAAA	0.304878	0
DNA	1	chr13	65110110	-	3	GCAGAATAGAGAGCCCAGGTATAG	GCAGAATAGAGAGCCCAGGTATAG	GCAGCATAGTGAGCCCA-GAANRG	GCAGCATAGTGAGCCCAGAANRG				0	0	0	0	37.01	0	0	0	GAGCAGAATAGAGAGCCCAGGTATAGACC	0.109858	0
DNA	1	chr13	23604668	+	3	ACAGAATAGAGAGCCCAGGAATAG	ACAGAATAGAGAGCCCAGGAATAG	GCAGCATAGTGAGCCCA-GAANRG	GCAGCATAGTGAGCCCAGAANRG				0	0	0	0	42.89	0	0	0	GGAACAGAATAGAGAGCCCAGGAATAGAC	0.282746	0
RNA	1	chr13	111131240	+	3	GCACCA-AGGGAGCCCAGGAGGG	GCACCAAGGGAGCCCAGGAGGG	GCAGCATAGTGAGCCCAGAANRG	GCAGCATAGTGAGCCCAGAANRG				0	0	0	0	41.99	0	0	0	ATGGCACCAAGGGAGCCCAGGAGGGTGCG	0.13055	0
RNA	1	chr13	18993373	+	3	GCAGAA-AGTCAGGCCAGAACAG	GCAGAAAGTCAGGCCAGAACAG	GCAGCATAGTGAGCCCAGAANRG	GCAGCATAGTGAGCCCAGAANRG				0	0	0	0	45.47	0	0	0	AAAGCAGAAAGTCAGGCCAGAACAGAAAG	0.123287	0
DNA	1	chr2	18787937	-	3	GCAGCATAGTGCTGCCCAGAGGGG	GCAGCATAGTGCTGCCCAGAGGGG	GCAGCATAGTGAG-CCCAGAANRG	GCAGCATAGTGAGCCCAGAANRG				0	0	0	0	44.5	0	0	0	AGGCAGCATAGTGCTGCCCAGAGGGGCCA	0.444655	0
DNA	1	chr2	15742642	-	3	GCAGCCTGGTGAGACCCTGAACAG	GCAGCCTGGTGAGACCCTGAACAG	GCAGCATAGTGAG-CCCAGAANRG	GCAGCATAGTGAGCCCAGAANRG				0	0	0	0	41.92	0	0	0	TTGCAGCCTGGTGAGACCCTGAACAGAGG	0.109367	0
DNA	1	chr2	194714609	+	3	GCAGCATTTTGAGGCCCTGAATAG	GCAGCATTTTGAGGCCCTGAATAG	GCAGCATAGTGAG-CCCAGAANRG	GCAGCATAGTGAGCCCAGAANRG				0	0	0	0	41.78	0	0	0	GATGCAGCATTTTGAGGCCCTGAATAGGG	0.107924	0
RNA	1	chr2	164143990	-	3	GGAGCATA-GAAGCCCAGAACAG	GGAGCATAGAAGCCCAGAACAG	GCAGCATAGTGAGCCCAGAANRG	GCAGCATAGTGAGCCCAGAANRG				0	0	0	0	46.21	0	0	0	CTGAGGAGCATAGAAGCCCAGAACAGTAC	0.261996	0
RNA	1	chr2	162508672	+	3	ACAGAATA-TGAGGCCAGAAAAG	ACAGAATATGAGGCCAGAAAAG	GCAGCATAGTGAGCCCAGAANRG	GCAGCATAGTGAGCCCAGAANRG				0	0	0	0	45.93	0	0	0	TGGACAGAATATGAGGCCAGAAAAGAATA	0.139024	0
RNA	1	chr2	105822845	+	3	GCAGAAAA-TGAGCCCAGAGAGG	GCAGAAAATGAGCCCAGAGAGG	GCAGCATAGTGAGCCCAGAANRG	GCAGCATAGTGAGCCCAGAANRG				0	0	0	0	41.12	0	0	0	ATAGCAGAAAATGAGCCCAGAGAGGTTAC	0.149764	0
RNA	1	chr2	96312650	-	3	GCAGCAGA-TGAGGCCAGACAAG	GCAGCAGATGAGGCCAGACAAG	GCAGCATAGTGAGCCCAGAANRG	GCAGCATAGTGAGCCCAGAANRG				0	0	0	0	40.01	0	0	0	CTTTGCAGCAGATGAGGCCAGACAAGTCA	0.0602231	0
RNA	1	chr2	55230636	+	3	GCAGCAAA-TGAGCCTGGAAAAG	GCAGCAAATGAGCCTGGAAAAG	GCAGCATAGTGAGCCCAGAANRG	GCAGCATAGTGAGCCCAGAANRG				0	0	0	0	42.01	0	0	0	GAAGCAGCAAATGAGCCTGGAAAAGAGCC	0.159264	0
RNA	1	chr2	173479150	-	3	GCAGGAGA-TGAGCTCAGAATGG	GCAGGAGATGAGCTCAGAATGG	GCAGCATAGTGAGCCCAGAANRG	GCAGCATAGTGAGCCCAGAANRG				0	0	0	0	45.22	0	0	0	AGAGGCAGGAGATGAGCTCAGAATGGTCA	0.0712106	0
RNA	1	chr2	180073329	+	3	GCAACATC-TGAGGCCAGAATGG	GCAACATCTGAGGCCAGAATGG	GCAGCATAGTGAGCCCAGAANRG	GCAGCATAGTGAGCCCAGAANRG				0	0	0	0	45.8	0	0	0	CTGGCAACATCTGAGGCCAGAATGGGAAT	0.148781	0
RNA	1	chr2	180789676	-	3	GAAGCAAA-TGAGGCCAGAAAGG	GAAGCAAATGAGGCCAGAAAGG	GCAGCATAGTGAGCCCAGAANRG	GCAGCATAGTGAGCCCAGAANRG				0	0	0	0	45.88	0	0	0	TCAAGAAGCAAATGAGGCCAGAAAGGAGA	0.12101	0
RNA	1	chr2	234712899	+	3	GGAGGAGA-TGAGCCCAGAAAGG	GGAGGAGATGAGCCCAGAAAGG	GCAGCATAGTGAGCCCAGAANRG	GCAGCATAGTGAGCCCAGAANRG				0	0	0	0	46.99	0	0	0	TCAGGAGGAGATGAGCCCAGAAAGGACAG	0.131575	0
RNA	1	chr2	238694765	-	3	GCAGCATC-TGGGCCAAGAAAGG	GCAGCATCTGGGCCAAGAAAGG	GCAGCATAGTGAGCCCAGAANRG	GCAGCATAGTGAGCCCAGAANRG				0	0	0	0	44.17	0	0	0	CTGTGCAGCATCTGGGCCAAGAAAGGGAC	0.10868	0
DNA	1	chr2	192674638	+	3	GCAGCAGTGCTGAGCCCAGGAGAG	GCAGCAGTGCTGAGCCCAGGAGAG	GCAGCATAG-TGAGCCCAGAANRG	GCAGCATAGTGAGCCCAGAANRG				0	0	0	0	40.7	0	0	0	TGAGCAGCAGTGCTGAGCCCAGGAGAGGG	0.158543	0
DNA	1	chr2	9638246	-	3	GCAGCAGAGCAAAGCCCAGAAGAG	GCAGCAGAGCAAAGCCCAGAAGAG	GCAGCATAG-TGAGCCCAGAANRG	GCAGCATAGTGAGCCCAGAANRG				0	0	0	0	45.47	0	0	0	TGGCAGCAGAGCAAAGCCCAGAAGAGGCT	0.150431	0
RNA	1	chr2	217931864	-	3	GCAGCATAGGGA-ACCCGAAGAG	GCAGCATAGGGAACCCGAAGAG	GCAGCATAGTGAGCCCAGAANRG	GCAGCATAGTGAGCCCAGAANRG				0	0	0	0	41.99	0	0	0	ACAGGCAGCATAGGGAACCCGAAGAGTCA	0.203532	0
RNA	1	chr2	217994596	+	3	GCAGCAGAGTCT-CCCAGAAGAG	GCAGCAGAGTCTCCCAGAAGAG	GCAGCATAGTGAGCCCAGAANRG	GCAGCATAGTGAGCCCAGAANRG				0	0	0	0	45.06	0	0	0	GGGGCAGCAGAGTCTCCCAGAAGAGAGCC	0.156024	0
RNA	1	chr2	148129196	+	3	GCAAAATAGTGA-CCCAGACCGG	GCAAAATAGTGACCCAGACCGG	GCAGCATAGTGAGCCCAGAANRG	GCAGCATAGTGAGCCCAGAANRG				0	0	0	0	40.43	0	0	0	TAAGCAAAATAGTGACCCAGACCGGGTGC	0.155613	0
RNA	1	chr2	142786022	-	3	GCAGGTTAGAGA-CCCAGAATAG	GCAGGTTAGAGACCCAGAATAG	GCAGCATAGTGAGCCCAGAANRG	GCAGCATAGTGAGCCCAGAANRG				0	0	0	0	45.89	0	0	0	GCTGGCAGGTTAGAGACCCAGAATAGGCA	0.0568061	0
RNA	1	chr2	132929787	-	3	TCAGCATAGTGA-CCAATAATAG	TCAGCATAGTGACCAATAATAG	GCAGCATAGTGAGCCCAGAANRG	GCAGCATAGTGAGCCCAGAANRG				0	0	0	0	40.37	0	0	0	AAAGTCAGCATAGTGACCAATAATAGGAA	0.0449	0
RNA	1	chr2	132467751	+	3	GGAACATAGTGG-CCCAGAACAG	GGAACATAGTGGCCCAGAACAG	GCAGCATAGTGAGCCCAGAANRG	GCAGCATAGTGAGCCCAGAANRG				0	0	0	0	45.69	0	0	0	CAGGGAACATAGTGGCCCAGAACAGTTAG	0.178107	0
RNA	1	chr2	31640691	+	3	GCAGCATAGTGC-CACTGAACAG	GCAGCATAGTGCCACTGAACAG	GCAGCATAGTGAGCCCAGAANRG	GCAGCATAGTGAGCCCAGAANRG				0	0	0	0	41.09	0	0	0	CCTGCAGCATAGTGCCACTGAACAGCCAC	0.141771	0
RNA	1	chr2	30169573	+	3	CCAGACTAGTGA-CCCAGAAAGG	CCAGACTAGTGACCCAGAAAGG	GCAGCATAGTGAGCCCAGAANRG	GCAGCATAGTGAGCCCAGAANRG				0	0	0	0	46.27	0	0	0	TCCCCAGACTAGTGACCCAGAAAGGCAAG	0.124357	0
RNA	1	chr2	21958415	-	3	GCAGTATATAGA-CCCAGAAGAG	GCAGTATATAGACCCAGAAGAG	GCAGCATAGTGAGCCCAGAANRG	GCAGCATAGTGAGCCCAGAANRG				0	0	0	0	45.75	0	0	0	TCAAGCAGTATATAGACCCAGAAGAGGAG	0.0772212	0
RNA	1	chr2	15744947	-	3	GCAGCAGAGTGG-CCGAGAAAAG	GCAGCAGAGTGGCCGAGAAAAG	GCAGCATAGTGAGCCCAGAANRG	GCAGCATAGTGAGCCCAGAANRG				0	0	0	0	43.46	0	0	0	GTGAGCAGCAGAGTGGCCGAGAAAAGTGT	0.180183	0
RNA	1	chr2	15114768	-	3	GCAGCATAATGA-ACTAGAAGAG	GCAGCATAATGAACTAGAAGAG	GCAGCATAGTGAGCCCAGAANRG	GCAGCATAGTGAGCCCAGAANRG				0	0	0	0	42.84	0	0	0	ATGTGCAGCATAATGAACTAGAAGAGGAT	0.0830811	0
RNA	1	chr2	216379235	+	3	GCAACATAGTGA-AACAGAAAAG	GCAACATAGTGAAACAGAAAAG	GCAGCATAGTGAGCCCAGAANRG	GCAGCATAGTGAGCCCAGAANRG				0	0	0	0	43.42	0	0	0	GAAGCAACATAGTGAAACAGAAAAGATGC	0.153437	0
DNA	1	chr13	99588470	-	3	GCAGCAGAGTGAGACCCTGAAAAG	GCAGCAGAGTGAGACCCTGAAAAG	GCAGCATAGTGA-GCCCAGAANRG	GCAGCATAGTGAGCCCAGAANRG				0	0	0	0	41.07	0	0	0	GGGCAGCAGAGTGAGACCCTGAAAAGAAA	0.304878	0
DNA	1	chr13	99435453	-	3	GGAGCAAACTGAAGCCCAGAATGG	GGAGCAAACTGAAGCCCAGAATGG	GCAGCATAGTGA-GCCCAGAANRG	GCAGCATAGTGAGCCCAGAANRG				0	0	0	0	45.89	0	0	0	GAGGAGCAAACTGAAGCCCAGAATGGGAA	0.135736	0
DNA	1	chr13	58228370	+	3	AACAGAATAGAGAGCCCAGAAAGG	AACAGAATAGAGAGCCCAGAAAGG	G-CAGCATAGTGAGCCCAGAANRG	GCAGCATAGTGAGCCCAGAANRG				0	0	0	0	46.54	0	0	0	TGGAACAGAATAGAGAGCCCAGAAAGGAA	0.0610087	0
DNA	1	chr13	105895863	+	3	GGATACATATTGAGCCCAGAATAG	GGATACATATTGAGCCCAGAATAG	GCA-GCATAGTGAGCCCAGAANRG	GCAGCATAGTGAGCCCAGAANRG				0	0	0	0	46.71	0	0	0	AAGGGATACATATTGAGCCCAGAATAGAG	0.0958182	0
DNA	1	chr13	40703505	+	3	GCTTGCATCCTGAGCCCAGAAAAG	GCTTGCATCCTGAGCCCAGAAAAG	GCA-GCATAGTGAGCCCAGAANRG	GCAGCATAGTGAGCCCAGAANRG				0	0	0	0	46.53	0	0	0	GCAGCTTGCATCCTGAGCCCAGAAAAGCC	0.0938454	0
RNA	1	chr2	217994596	+	3	GCAGCAGAGT-CTCCCAGAAGAG	GCAGCAGAGTCTCCCAGAAGAG	GCAGCATAGTGAGCCCAGAANRG	GCAGCATAGTGAGCCCAGAANRG				0	0	0	0	45.06	0	0	0	GGGGCAGCAGAGTCTCCCAGAAGAGAGCC	0.156024	0
RNA	1	chr2	164143990	-	2	GGAGCATAGA-AGCCCAGAACAG	GGAGCATAGAAGCCCAGAACAG	GCAGCATAGTGAGCCCAGAANRG	GCAGCATAGTGAGCCCAGAANRG				0	0	0	0	46.56	0	0	0	CTGAGGAGCATAGAAGCCCAGAACAGTAC	0.261996	0
RNA	1	chr2	132467751	+	3	GGAACATAGT-GGCCCAGAACAG	GGAACATAGTGGCCCAGAACAG	GCAGCATAGTGAGCCCAGAANRG	GCAGCATAGTGAGCCCAGAANRG				0	0	0	0	46.09	0	0	0	CAGGGAACATAGTGGCCCAGAACAGTTAG	0.178107	0
RNA	1	chr2	15744947	-	3	GCAGCAGAGT-GGCCGAGAAAAG	GCAGCAGAGTGGCCGAGAAAAG	GCAGCATAGTGAGCCCAGAANRG	GCAGCATAGTGAGCCCAGAANRG				0	0	0	0	43.86	0	0	0	GTGAGCAGCAGAGTGGCCGAGAAAAGTGT	0.180183	0
RNA	1	chr2	9153976	-	3	GCAAGATACT-AGCCCAGAAGAG	GCAAGATACTAGCCCAGAAGAG	GCAGCATAGTGAGCCCAGAANRG	GCAGCATAGTGAGCCCAGAANRG				0	0	0	0	46.48	0	0	0	TGCCGCAAGATACTAGCCCAGAAGAGAAG	0.0752385	0
RNA	1	chr13	38519191	+	2	GCAG-ATAGTGAGGGCAGAAGAG	GCAGATAGTGAGGGCAGAAGAG	GCAGCATAGTGAGCCCAGAANRG	GCAGCATAGTGAGCCCAGAANRG				0	0	0	0	44.5	0	0	0	TAGGCAGATAGTGAGGGCAGAAGAGTCCT	0.193146	0
RNA	1	chr13	18993373	+	3	GCAG-AAAGTCAGGCCAGAACAG	GCAGAAAGTCAGGCCAGAACAG	GCAGCATAGTGAGCCCAGAANRG	GCAGCATAGTGAGCCCAGAANRG				0	0	0	0	45.47	0	0	0	AAAGCAGAAAGTCAGGCCAGAACAGAAAG	0.123287	0
DNA	1	chr13	99588470	-	3	GCAGCAGAGTGAGACCCTGAAAAG	GCAGCAGAGTGAGACCCTGAAAAG	GCAGCATAGTGAGC-CCAGAANRG	GCAGCATAGTGAGCCCAGAANRG				0	0	0	0	40.27	0	0	0	GGGCAGCAGAGTGAGACCCTGAAAAGAAA	0.304878	0
RNA	1	chr13	71518844	+	3	ACAGC-TAGTGAGCAAAGAATGG	ACAGCTAGTGAGCAAAGAATGG	GCAGCATAGTGAGCCCAGAANRG	GCAGCATAGTGAGCCCAGAANRG				0	0	0	0	43.36	0	0	0	TGTACAGCTAGTGAGCAAAGAATGGTTTC	0.132216	0
RNA	1	chr13	48457464	+	3	GCCAC-TAGTGGGCCCAGAAAAG	GCCACTAGTGGGCCCAGAAAAG	GCAGCATAGTGAGCCCAGAANRG	GCAGCATAGTGAGCCCAGAANRG				0	0	0	0	46.56	0	0	0	GCGGCCACTAGTGGGCCCAGAAAAGGTAC	0.248963	0
RNA	1	chr13	38519191	+	3	GCAGA-TAGTGAGGGCAGAAGAG	GCAGATAGTGAGGGCAGAAGAG	GCAGCATAGTGAGCCCAGAANRG	GCAGCATAGTGAGCCCAGAANRG				0	0	0	0	44.29	0	0	0	TAGGCAGATAGTGAGGGCAGAAGAGTCCT	0.193146	0
DNA	1	chr13	82871937	-	3	GAAGAATAGAGAGCCCAGAAATAG	GAAGAATAGAGAGCCCAGAAATAG	GCAGCATAGTGAGCCCAG-AANRG	GCAGCATAGTGAGCCCAGAANRG				0	0	0	0	41.88	0	0	0	GAGAAGAATAGAGAGCCCAGAAATAGAGC	0.114922	0
DNA	1	chr13	77417124	-	3	GGAGCAAATTGAGCCCAGCAAAAG	GGAGCAAATTGAGCCCAGCAAAAG	GCAGCATAGTGAGCCCAG-AANRG	GCAGCATAGTGAGCCCAGAANRG				0	0	0	0	41.99	0	0	0	ATGGAGCAAATTGAGCCCAGCAAAAGCAA	0.0983234	0
DNA	1	chr13	66847776	+	3	GCAGCATATAGAGCCCAGAGACAG	GCAGCATATAGAGCCCAGAGACAG	GCAGCATAGTGAGCCCAG-AANRG	GCAGCATAGTGAGCCCAGAANRG				0	0	0	0	35.85	0	0	0	CAGGCAGCATATAGAGCCCAGAGACAGAA	0.446115	0
DNA	1	chr13	65102979	-	3	ACAGAATAGAGAGCCCAGAAATAG	ACAGAATAGAGAGCCCAGAAATAG	GCAGCATAGTGAGCCCAG-AANRG	GCAGCATAGTGAGCCCAGAANRG				0	0	0	0	41.89	0	0	0	GAACAGAATAGAGAGCCCAGAAATAGACC	0.117788	0
DNA	1	chr13	65110110	-	3	GCAGAATAGAGAGCCCAGGTATAG	GCAGAATAGAGAGCCCAGGTATAG	GCAGCATAGTGAGCCCAG-AANRG	GCAGCATAGTGAGCCCAGAANRG				0	0	0	0	36.01	0	0	0	GAGCAGAATAGAGAGCCCAGGTATAGACC	0.109858	0
DNA	1	chr13	54779610	+	3	ACAGAATAGAGAGCCCAGAAATAG	ACAGAATAGAGAGCCCAGAAATAG	GCAGCATAGTGAGCCCAG-AANRG	GCAGCATAGTGAGCCCAGAANRG				0	0	0	0	41.89	0	0	0	GGAACAGAATAGAGAGCCCAGAAATAGGG	0.462322	0
RNA	1	chr13	88684923	-	3	GCAGCATAGTGAGTTAA-AAAGG	GCAGCATAGTGAGTTAAAAAGG	GCAGCATAGTGAGCCCAGAANRG	GCAGCATAGTGAGCCCAGAANRG				0	0	0	0	38.39	0	0	0	ACAAGCAGCATAGTGAGTTAAAAAGGACT	0.179392	0
RNA	1	chr13	80543660	+	3	GCAGCATAGTGAGGCCC-CATGG	GCAGCATAGTGAGGCCCCATGG	GCAGCATAGTGAGCCCAGAANRG	GCAGCATAGTGAGCCCAGAANRG				0	0	0	0	34.59	0	0	0	ACTGCAGCATAGTGAGGCCCCATGGAGAT	0.297021	0
DNA	1	chr13	40525691	+	3	ACAGAATAGAGAGCCCAGAAATAG	ACAGAATAGAGAGCCCAGAAATAG	GCAGCATAGTGAGCCCAG-AANRG	GCAGCATAGTGAGCCCAGAANRG				0	0	0	0	41.89	0	0	0	AGAACAGAATAGAGAGCCCAGAAATAGAT	0.460438	0
RNA	1	chr13	58324375	+	3	GCTGCACAGTGAGCACA-AAGAG	GCTGCACAGTGAGCACAAAGAG	GCAGCATAGTGAGCCCAGAANRG	GCAGCATAGTGAGCCCAGAANRG				0	0	0	0	41.61	0	0	0	TTTGCTGCACAGTGAGCACAAAGAGATAC	0.1016	0
DNA	1	chr13	39187452	-	3	ACAGAATAGTGAGTCCAGAAATAG	ACAGAATAGTGAGTCCAGAAATAG	GCAGCATAGTGAGCCCAG-AANRG	GCAGCATAGTGAGCCCAGAANRG				0	0	0	0	41.09	0	0	0	GGACAGAATAGTGAGTCCAGAAATAGACC	0.136991	0
DNA	1	chr13	23604668	+	3	ACAGAATAGAGAGCCCAGGAATAG	ACAGAATAGAGAGCCCAGGAATAG	GCAGCATAGTGAGCCCAG-AANRG	GCAGCATAGTGAGCCCAGAANRG				0	0	0	0	41.89	0	0	0	GGAACAGAATAGAGAGCCCAGGAATAGAC	0.282746	0
DNA	1	chr13	99588470	-	2	GCAGCAGAGTGAGACCCTGAAAAG	GCAGCAGAGTGAGACCCTGAAAAG	GCAGCATAGTGAG-CCCAGAANRG	GCAGCATAGTGAGCCCAGAANRG				0	0	0	0	42.17	0	0	0	GGGCAGCAGAGTGAGACCCTGAAAAGAAA	0.304878	0
RNA	1	chr13	82437906	+	3	GCAGCAAAGTGA-TCAAGAAGGG	GCAGCAAAGTGATCAAGAAGGG	GCAGCATAGTGAGCCCAGAANRG	GCAGCATAGTGAGCCCAGAANRG				0	0	0	0	42.96	0	0	0	TAAGCAGCAAAGTGATCAAGAAGGGGTCT	0.13696	0
RNA	1	chr13	69761163	+	2	GCAGCATAATGA-ACCAGAATAG	GCAGCATAATGAACCAGAATAG	GCAGCATAGTGAGCCCAGAANRG	GCAGCATAGTGAGCCCAGAANRG				0	0	0	0	45.14	0	0	0	CTGGCAGCATAATGAACCAGAATAGTTTC	0.191065	0
RNA	1	chr13	42523293	+	2	GCAGCATGGGGA-CCCAGAATGG	GCAGCATGGGGACCCAGAATGG	GCAGCATAGTGAGCCCAGAANRG	GCAGCATAGTGAGCCCAGAANRG				0	0	0	0	46.02	0	0	0	GCAGCAGCATGGGGACCCAGAATGGTGGC	0.185527	0
[truncated: 15,488 more rows]
